# Supplementary material for: Developing a crop- wild-reservoir pathogen system to understand pathogen evolution and emergence
Source: eLife. 2025 Apr 11;14:e91245. doi: 10.7554/eLife.91245 (PMC11991705; doi:10.7554/eLife.91245)
Supplement: Source data 1. — Gene diversity and differentiation analyses combined with annotation statistics for all genes. Analyses are replicated using SNP diversity from isolates partitioned into five groupings (see ‘Pop’ column). The groups contain diversity from all individuals combined (allind), crop isolates, defined both using population differentiation analyses (agri-dapc) and based on host affiliation (agri-host) and the wild rusts by both of those criteria (wild-dapc and wild-host). Genetic differentiation measures are recorded between populations defined using the same criteria (-dapc or -host). [file elife-91245-data1.xlsx]

## Sheet: allind.annt.dnasp.yn00.all.busc
Pop	Gene	effectorP	No.Trnscpts	TrnscptsID	Confidence	BioType	Human-Readable-Description	Interpro-ID	Gene-Ontology-Term	n	Sites	S	Hap	Pi	GC	TajimaD	GeneFST	WC-mean-Fst	WC-wghtd-Fst	No.SNPsFst
allind	UROBE1963355_EIv1.0_0000010	0	2	UROBE1963355_EIv1.0_0000010.1	High	protein_coding_gene	zf-C2HC5 domain-containing protein	IPR009349 (Zinc finger, C2HC5-type)	GO:0005634, GO:0006355, GO:0008270	84	1572	1	2	1.5146e-05	0.470738	-1.04726	UROBE1963355_EIv1.0_0000010	0.10038	0.22243	29
allind	UROBE1963355_EIv1.0_0000020	0	1	UROBE1963355_EIv1.0_0000020.1	High	transposable_element_gene	Integrase catalytic domain-containing protein	IPR012337 (Ribonuclease H-like domain)	None	84	1710	0	1	0	0.447368	NA	UROBE1963355_EIv1.0_0000020	0.048897	0.14643	64
allind	UROBE1963355_EIv1.0_0000030	0	1	UROBE1963355_EIv1.0_0000030.1	High	protein_coding_gene	ARM repeat-containing protein	IPR016024 (Armadillo-type fold)	None	84	2442	0	1	0	0.48403	NA	UROBE1963355_EIv1.0_0000030	0.16857	0.36677	14
allind	UROBE1963355_EIv1.0_0000040	0	1	UROBE1963355_EIv1.0_0000040.1	Low	transposable_element_gene	Unknown protein	None	None	84	189	0	1	0	0.31746	NA	UROBE1963355_EIv1.0_0000040	0.082085	0.13802	17
allind	UROBE1963355_EIv1.0_0000050	0	3	UROBE1963355_EIv1.0_0000050.1	High	protein_coding_gene	HIT-type domain-containing protein	IPR007529 (Zinc finger, HIT-type)	GO:0046872	84	600	1	2	0.000652132	0.455437	1.13797	UROBE1963355_EIv1.0_0000050	0.088988	0.16878	16
allind	UROBE1963355_EIv1.0_0000060	0	1	UROBE1963355_EIv1.0_0000060.1	High	protein_coding_gene	TAP42-like protein	IPR007304 (TAP42-like protein)	GO:0009966	84	1161	0	1	0	0.513351	NA	UROBE1963355_EIv1.0_0000060	0.082864	0.17444	16
allind	UROBE1963355_EIv1.0_0000070	0	2	UROBE1963355_EIv1.0_0000070.1	High	protein_coding_gene	CAP-Gly domain-containing protein	IPR000938 (CAP Gly-rich domain), IPR022157 (Dynein associated protein)	None	84	4155	1	2	9.68633e-05	0.473231	1.2045	UROBE1963355_EIv1.0_0000070	0.1915	0.48227	13
allind	UROBE1963355_EIv1.0_0000080	0	1	UROBE1963355_EIv1.0_0000080.1	High	protein_coding_gene	Deacetylase sirtuin-type domain-containing protein	IPR003000 (Sirtuin family), IPR007654 (NAD-dependent histone deacetylase Sir2, N-terminal), IPR026591 (Sirtuin family, catalytic core small domain), IPR029035 (DHS-like NAD/FAD-binding domain)	GO:0070403	84	1863	4	4	0.000100086	0.463257	-1.56848	UROBE1963355_EIv1.0_0000080	0.2153	0.50822	11
allind	UROBE1963355_EIv1.0_0000090	0	1	UROBE1963355_EIv1.0_0000090.1	High	transposable_element_gene	Integrase catalytic domain-containing protein	None	GO:0003676, GO:0015074	84	483	0	1	0	0.438923	NA	UROBE1963355_EIv1.0_0000090	0.2316	0.61944	15
allind	UROBE1963355_EIv1.0_0000100	0	1	UROBE1963355_EIv1.0_0000100.1	High	transposable_element_gene	DDE_3 domain-containing protein	IPR009057 (Homeobox domain-like)	GO:0003677	84	501	0	1	0	0.463074	NA	UROBE1963355_EIv1.0_0000100	0.08429	0.080785	5
allind	UROBE1963355_EIv1.0_0000110	0	3	UROBE1963355_EIv1.0_0000110.1	High	protein_coding_gene	V-type proton ATPase subunit F	IPR008218 (ATPase, V1 complex, subunit F)	GO:0006811, GO:0015991, GO:0033180, GO:0034220, GO:0046961	84	369	0	1	0	0.512195	NA	UROBE1963355_EIv1.0_0000110	0.068454	0.070026	4
allind	UROBE1963355_EIv1.0_0000120	0	1	UROBE1963355_EIv1.0_0000120.1	Low	protein_coding_gene	Unknown protein	None	None	84	948	0	1	0	0.477848	NA	UROBE1963355_EIv1.0_0000120	0.014184	0.0079347	2
allind	UROBE1963355_EIv1.0_0000130	0	3	UROBE1963355_EIv1.0_0000130.1	High	protein_coding_gene	Unknown protein	None	None	84	3693	0	1	0	0.512321	NA	UROBE1963355_EIv1.0_0000130	0.005941	0.00048814	63
allind	UROBE1963355_EIv1.0_0000140	0	1	UROBE1963355_EIv1.0_0000140.1	High	protein_coding_gene	Nucleolar GTP-binding protein 1	IPR010674 (Nucleolar GTP-binding protein 1, Rossman-fold domain), IPR012973 (NOG, C-terminal), IPR024926 (Nucleolar GTP-binding protein 1), IPR027417 (P-loop containing nucleoside triphosphate hydrolase)	GO:0005525, GO:0005634, GO:0005730, GO:0042254	84	2103	0	1	0	0.448883	NA	UROBE1963355_EIv1.0_0000140	0.026914	0.022639	18
allind	UROBE1963355_EIv1.0_0000150	0	1	UROBE1963355_EIv1.0_0000150.1	High	protein_coding_gene	Unknown protein	None	None	84	318	1	2	0.000291415	0.520786	-0.642967	UROBE1963355_EIv1.0_0000150	0.015416	0.010966	17
allind	UROBE1963355_EIv1.0_0000160	0	1	UROBE1963355_EIv1.0_0000160.1	High	transposable_element_gene	Helicase ATP-binding domain-containing protein	IPR000330 (SNF2-related, N-terminal domain), IPR027417 (P-loop containing nucleoside triphosphate hydrolase), IPR030065 (Helicase-like transcription factor)	None	84	798	2	3	0.000200947	0.454962	-0.952757	UROBE1963355_EIv1.0_0000160	0.045116	0.061299	13
allind	UROBE1963355_EIv1.0_0000170	0	1	UROBE1963355_EIv1.0_0000170.1	High	transposable_element_gene	Unknown protein	None	None	84	1944	2	3	6.0058e-05	0.46962	-1.12623	UROBE1963355_EIv1.0_0000170	0.058246	0.099212	21
allind	UROBE1963355_EIv1.0_0000180	0	2	UROBE1963355_EIv1.0_0000180.1	Low	protein_coding_gene	Unknown protein	None	None	84	747	0	1	0	0.544846	NA	UROBE1963355_EIv1.0_0000180	0.035823	0.060871	16
allind	UROBE1963355_EIv1.0_0000190	0	1	UROBE1963355_EIv1.0_0000190.1	Low	transposable_element_gene	Integrase catalytic domain-containing protein	IPR013103 (Reverse transcriptase, RNA-dependent DNA polymerase)	GO:0000943, GO:0003676, GO:0015074	84	2958	0	1	0	0.496957	NA	UROBE1963355_EIv1.0_0000190	0.093072	0.20534	20
allind	UROBE1963355_EIv1.0_0000200	0	2	UROBE1963355_EIv1.0_0000200.1	High	protein_coding_gene	Histone acetyltransferase	IPR016181 (Acyl-CoA N-acyltransferase), IPR016197 (Chromo domain-like)	None	84	1686	7	6	0.000208426	0.443689	-1.80525	UROBE1963355_EIv1.0_0000200	0.021434	0.047428	34
allind	UROBE1963355_EIv1.0_0000210	0	3	UROBE1963355_EIv1.0_0000210.1	High	protein_coding_gene	Unknown protein	None	None	84	489	0	1	0	0.539877	NA	UROBE1963355_EIv1.0_0000210	0.13322	0.25669	14
allind	UROBE1963355_EIv1.0_0000220	0	1	UROBE1963355_EIv1.0_0000220.1	High	protein_coding_gene	AB hydrolase-1 domain-containing protein	None	None	84	675	1	2	0.00010327	0.503704	-0.774319	UROBE1963355_EIv1.0_0000220	0.013639	0.018095	11
allind	UROBE1963355_EIv1.0_0000230	0	2	UROBE1963355_EIv1.0_0000230.1	Low	transposable_element_gene	Unknown protein	None	None	84	204	2	3	0.000233427	0.362862	-1.40128	UROBE1963355_EIv1.0_0000230	0.03672	0.072085	28
allind	UROBE1963355_EIv1.0_0000240	0	1	UROBE1963355_EIv1.0_0000240.1	High	protein_coding_gene	6-phosphogluconate dehydrogenase, decarboxylating	IPR006183 (6-phosphogluconate dehydrogenase), IPR008927 (6-phosphogluconate dehydrogenase C-terminal domain-like), IPR013328 (6-phosphogluconate dehydrogenase, domain 2), IPR016040 (NAD(P)-binding domain)	GO:0004616, GO:0006098, GO:0016491, GO:0019521, GO:0050661, GO:0055114	84	1476	0	1	0	0.493225	NA	UROBE1963355_EIv1.0_0000240	0.074582	0.1156	40
allind	UROBE1963355_EIv1.0_0000250	0	2	UROBE1963355_EIv1.0_0000250.1	High	transposable_element_gene	Integrase catalytic domain-containing protein	None	GO:0000943, GO:0003676, GO:0015074	84	861	40	44	0.0162515	0.42441	2.38941	UROBE1963355_EIv1.0_0000250	0.041197	0.071341	76
allind	UROBE1963355_EIv1.0_0000260	0	1	UROBE1963355_EIv1.0_0000260.1	High	transposable_element_gene	CCHC-type domain-containing protein	IPR001878 (Zinc finger, CCHC-type)	GO:0000943, GO:0003676, GO:0008270	84	873	1	2	2.72732e-05	0.483404	-1.04726	UROBE1963355_EIv1.0_0000260	0.055731	0.15648	34
allind	UROBE1963355_EIv1.0_0000270	0	3	UROBE1963355_EIv1.0_0000270.1	High	protein_coding_gene	Homeobox domain-containing protein	IPR009057 (Homeobox domain-like)	GO:0003677, GO:0005634, GO:0006355	84	2406	5	7	0.000268978	0.537228	-0.773459	UROBE1963355_EIv1.0_0000270	0.059066	0.12347	47
allind	UROBE1963355_EIv1.0_0000280	0	1	UROBE1963355_EIv1.0_0000280.1	Low	transposable_element_gene	Unknown protein	None	None	84	123	0	1	0	0.504065	NA	UROBE1963355_EIv1.0_0000280	0.080072	0.16635	41
allind	UROBE1963355_EIv1.0_0000290	0	1	UROBE1963355_EIv1.0_0000290.1	High	protein_coding_gene	Unknown protein	None	None	84	1128	1	2	2.11077e-05	0.470745	-1.04726	UROBE1963355_EIv1.0_0000290	0.13309	0.33728	27
allind	UROBE1963355_EIv1.0_0000300	1	1	UROBE1963355_EIv1.0_0000300.1	High	protein_coding_gene	Unknown protein	None	None	84	276	0	1	0	0.481884	NA	UROBE1963355_EIv1.0_0000300	0.075445	0.19909	36
allind	UROBE1963355_EIv1.0_0000310	0	1	UROBE1963355_EIv1.0_0000310.1	High	transposable_element_gene	Integrase catalytic domain-containing protein	None	GO:0003676, GO:0015074	84	519	1	2	0.000895407	0.408478	1.57468	UROBE1963355_EIv1.0_0000310	0.025876	0.034899	23
allind	UROBE1963355_EIv1.0_0000320	0	1	UROBE1963355_EIv1.0_0000320.1	Low	transposable_element_gene	Unknown protein	None	None	84	297	0	1	0	0.444444	NA	UROBE1963355_EIv1.0_0000320	0.025876	0.034899	23
allind	UROBE1963355_EIv1.0_0000330	0	1	UROBE1963355_EIv1.0_0000330.1	High	transposable_element_gene	Integrase catalytic domain-containing protein	None	GO:0000943, GO:0003676, GO:0015074	84	1063	0	1	0	0.476011	NA	UROBE1963355_EIv1.0_0000330	0.11192	0.12893	18
allind	UROBE1963355_EIv1.0_0000340	0	3	UROBE1963355_EIv1.0_0000340.1	High	protein_coding_gene	X-Pro aminopeptidase	IPR000994 (Peptidase M24), IPR029149 (Creatinase/Aminopeptidase P/Spt16, N-terminal), IPR032416 (Peptidase M24, C-terminal domain)	GO:0004177, GO:0006508, GO:0016787, GO:0046872, GO:0070006	84	2088	2	3	3.39343e-05	0.45786	-1.30883	UROBE1963355_EIv1.0_0000340	0.027607	0.015932	63
allind	UROBE1963355_EIv1.0_0000350	0	1	UROBE1963355_EIv1.0_0000350.1	Low	protein_coding_gene	RNase H domain-containing protein	IPR012337 (Ribonuclease H-like domain)	GO:0003676, GO:0004523, GO:0090502	84	510	0	1	0	0.519608	NA	UROBE1963355_EIv1.0_0000350	0.055131	0.064099	15
allind	UROBE1963355_EIv1.0_0000360	0	1	UROBE1963355_EIv1.0_0000360.1	High	transposable_element_gene	Integrase catalytic domain-containing protein	None	GO:0000943, GO:0003676, GO:0015074	84	486	1	2	0.000755521	0.455222	0.994679	UROBE1963355_EIv1.0_0000360	0.080556	0.086828	14
allind	UROBE1963355_EIv1.0_0000370	0	1	UROBE1963355_EIv1.0_0000370.1	High	transposable_element_gene	Integrase catalytic domain-containing protein	None	GO:0000943, GO:0003676, GO:0015074	84	885	2	3	5.38068e-05	0.538983	-1.40128	UROBE1963355_EIv1.0_0000370	0.019181	0.024191	22
allind	UROBE1963355_EIv1.0_0000380	0	1	UROBE1963355_EIv1.0_0000380.1	High	transposable_element_gene	CCHC-type domain-containing protein	None	GO:0003676, GO:0008270	84	1170	2	3	0.000201784	0.570849	-0.651463	UROBE1963355_EIv1.0_0000380	0.023255	0.049381	36
allind	UROBE1963355_EIv1.0_0000390	0	1	UROBE1963355_EIv1.0_0000390.1	High	protein_coding_gene	DUF572-domain-containing protein	IPR007590 (CWC16 protein)	GO:0005681, GO:0005684	84	1041	1	2	6.6962e-05	0.46209	-0.774319	UROBE1963355_EIv1.0_0000390	0.086553	0.1449	10
allind	UROBE1963355_EIv1.0_0000400	0	1	UROBE1963355_EIv1.0_0000400.1	High	protein_coding_gene	CCHC-type domain-containing protein	None	GO:0003676, GO:0008270	84	579	0	1	0	0.523316	NA	UROBE1963355_EIv1.0_0000400	0.078062	0.12787	11
allind	UROBE1963355_EIv1.0_0000410	0	1	UROBE1963355_EIv1.0_0000410.1	High	protein_coding_gene	Unknown protein	None	None	84	1311	0	1	0	0.475973	NA	UROBE1963355_EIv1.0_0000410	0.056031	0.048911	14
allind	UROBE1963355_EIv1.0_0000420	0	1	UROBE1963355_EIv1.0_0000420.1	High	protein_coding_gene	DDE Tnp4 domain-containing protein	IPR027806 (Harbinger transposase-derived nuclease domain)	None	84	939	0	1	0	0.476038	NA	UROBE1963355_EIv1.0_0000420	0.18902	0.26809	8
allind	UROBE1963355_EIv1.0_0000430	0	1	UROBE1963355_EIv1.0_0000430.1	High	protein_coding_gene	Myb_DNA-bind_3 domain-containing protein	IPR024752 (Myb/SANT-like domain)	None	84	546	0	1	0	0.507326	NA	UROBE1963355_EIv1.0_0000430	0.16391	0.23997	10
allind	UROBE1963355_EIv1.0_0000440	0	2	UROBE1963355_EIv1.0_0000440.1	High	protein_coding_gene	Glutamine amidotransferase type-1 domain-containing protein	IPR005801 (ADC synthase), IPR019999 (Anthranilate synthase component I-like), IPR029062 (Class I glutamine amidotransferase-like)	GO:0006541, GO:0009058	84	2514	5	6	9.21974e-05	0.569217	-1.68507	UROBE1963355_EIv1.0_0000440	0.073878	0.1816	34
allind	UROBE1963355_EIv1.0_0000450	0	1	UROBE1963355_EIv1.0_0000450.1	Low	protein_coding_gene	Unknown protein	None	None	84	324	0	1	0	0.5	NA	UROBE1963355_EIv1.0_0000450	0.056797	0.15619	29
allind	UROBE1963355_EIv1.0_0000460	0	4	UROBE1963355_EIv1.0_0000460.1	High	protein_coding_gene	CTP_transf_like domain-containing protein	IPR014729 (Rossmann-like alpha/beta/alpha sandwich fold)	GO:0003824, GO:0009058	84	1401	0	1	0	0.55389	NA	UROBE1963355_EIv1.0_0000460	0.026725	0.012668	32
allind	UROBE1963355_EIv1.0_0000470	0	1	UROBE1963355_EIv1.0_0000470.1	High	protein_coding_gene	Unknown protein	None	None	84	258	8	5	0.0141407	0.468531	3.1935	UROBE1963355_EIv1.0_0000470	0.037474	0.020362	35
allind	UROBE1963355_EIv1.0_0000480	0	1	UROBE1963355_EIv1.0_0000480.1	Low	transposable_element_gene	Unknown protein	None	None	84	285	0	1	0	0.396491	NA	UROBE1963355_EIv1.0_0000480	0.036203	0.020552	38
allind	UROBE1963355_EIv1.0_0000490	0	1	UROBE1963355_EIv1.0_0000490.1	High	transposable_element_gene	CCHC-type domain-containing protein	None	GO:0003676, GO:0008270	84	519	0	1	0	0.504817	NA	UROBE1963355_EIv1.0_0000490	0.10495	0.13996	43
allind	UROBE1963355_EIv1.0_0000500	0	1	UROBE1963355_EIv1.0_0000500.1	Low	transposable_element_gene	Unknown protein	None	None	84	201	1	2	0.00182678	0.344468	0.994679	UROBE1963355_EIv1.0_0000500	0.066507	0.14248	32
allind	UROBE1963355_EIv1.0_0000510	0	1	UROBE1963355_EIv1.0_0000510.1	High	transposable_element_gene	Integrase catalytic domain-containing protein	None	None	84	1113	0	1	0	0.493262	NA	UROBE1963355_EIv1.0_0000510	0.10191	0.22047	22
allind	UROBE1963355_EIv1.0_0000520	0	2	UROBE1963355_EIv1.0_0000520.1	High	transposable_element_gene	Integrase catalytic domain-containing protein	None	None	84	879	0	1	0	0.530148	NA	UROBE1963355_EIv1.0_0000520	0.061246	0.10371	37
allind	UROBE1963355_EIv1.0_0000530	0	1	UROBE1963355_EIv1.0_0000530.1	High	transposable_element_gene	Integrase catalytic domain-containing protein	None	GO:0000943, GO:0003676, GO:0015074	84	375	0	1	0	0.453333	NA	UROBE1963355_EIv1.0_0000530	0.050295	0.065068	12
allind	UROBE1963355_EIv1.0_0000540	0	5	UROBE1963355_EIv1.0_0000540.1	High	protein_coding_gene	Unknown protein	None	None	84	2562	2	3	6.25901e-05	0.503136	-0.952757	UROBE1963355_EIv1.0_0000540	0.026043	0.020348	23
allind	UROBE1963355_EIv1.0_0000550	0	1	UROBE1963355_EIv1.0_0000550.1	Low	transposable_element_gene	Unknown protein	None	None	84	528	2	3	0.00174671	0.682382	2.07845	UROBE1963355_EIv1.0_0000550	0.027618	0.027177	48
allind	UROBE1963355_EIv1.0_0000560	0	1	UROBE1963355_EIv1.0_0000560.1	High	protein_coding_gene	P-loop containing nucleoside triphosphate hydrolase protein	IPR001650 (Helicase, C-terminal), IPR004179 (Sec63 domain), IPR011991 (Winged helix-turn-helix DNA-binding domain), IPR014001 (Helicase superfamily 1/2, ATP-binding domain), IPR027417 (P-loop containing nucleoside triphosphate hydrolase)	None	84	4422	2	3	9.07552e-05	0.462291	0.005908	UROBE1963355_EIv1.0_0000560	0.060697	0.1603	16
allind	UROBE1963355_EIv1.0_0000570	0	1	UROBE1963355_EIv1.0_0000570.1	Low	predicted_gene	Unknown protein	None	None	84	264	0	1	0	0.386364	NA	UROBE1963355_EIv1.0_0000570	0.060485	0.12361	9
allind	UROBE1963355_EIv1.0_0000580	0	1	UROBE1963355_EIv1.0_0000580.1	High	protein_coding_gene	Integrase catalytic domain-containing protein	None	GO:0000943, GO:0003676, GO:0015074	84	396	0	1	0	0.467172	NA	UROBE1963355_EIv1.0_0000580	0.10589	0.19315	10
allind	UROBE1963355_EIv1.0_0000590	0	2	UROBE1963355_EIv1.0_0000590.1	High	transposable_element_gene	Integrase catalytic domain-containing protein	None	GO:0000943, GO:0003676, GO:0015074	84	945	0	1	0	0.428571	NA	UROBE1963355_EIv1.0_0000590	0.047163	0.079584	20
allind	UROBE1963355_EIv1.0_0000600	0	3	UROBE1963355_EIv1.0_0000600.1	High	protein_coding_gene	Guanine nucleotide binding protein, alpha subunit	IPR001019 (Guanine nucleotide binding protein (G-protein), alpha subunit), IPR027417 (P-loop containing nucleoside triphosphate hydrolase)	None	84	1083	2	3	0.000504061	0.44905	0.581107	UROBE1963355_EIv1.0_0000600	0.015667	0.030658	27
allind	UROBE1963355_EIv1.0_0000610	0	1	UROBE1963355_EIv1.0_0000610.1	High	transposable_element_gene	Retrotransposable element Tf2 155 kDa protein type 1-like	IPR012337 (Ribonuclease H-like domain), IPR016197 (Chromo domain-like)	GO:0003676, GO:0005634, GO:0015074	84	1005	4	5	0.000741274	0.473182	-0.139885	UROBE1963355_EIv1.0_0000610	0.050807	0.13763	21
allind	UROBE1963355_EIv1.0_0000620	0	1	UROBE1963355_EIv1.0_0000620.1	High	protein_coding_gene	P-loop containing nucleoside triphosphate hydrolase protein	IPR027417 (P-loop containing nucleoside triphosphate hydrolase), IPR033756 (Flagellum site-determining protein YlxH/ Fe-S cluster assembling factor NBP35)	None	84	1041	0	1	0	0.536023	NA	UROBE1963355_EIv1.0_0000620	0.016322	0.038419	15
allind	UROBE1963355_EIv1.0_0000630	0	1	UROBE1963355_EIv1.0_0000630.1	High	protein_coding_gene	Mitochondrial distribution and morphology protein 34	None	GO:0000002, GO:0005739, GO:0005741, GO:0006869, GO:0007005, GO:0008289, GO:0016020, GO:0016021, GO:0031307, GO:0032865	84	1851	3	4	0.00016877	0.506682	-0.888072	UROBE1963355_EIv1.0_0000630	0.019885	0.03249	18
allind	UROBE1963355_EIv1.0_0000640	0	3	UROBE1963355_EIv1.0_0000640.1	High	protein_coding_gene	RPOL4c domain-containing protein	IPR005574 (RNA polymerase II, Rpb4)	GO:0000166, GO:0003824, GO:0006352, GO:0030880, GO:0044237	84	393	0	1	0	0.427481	NA	UROBE1963355_EIv1.0_0000640	0.075652	0.20503	21
allind	UROBE1963355_EIv1.0_0000650	0	2	UROBE1963355_EIv1.0_0000650.1	High	protein_coding_gene	Aminopeptidase	IPR001930 (Peptidase M1, alanine aminopeptidase/leukotriene A4 hydrolase), IPR024571 (ERAP1-like C-terminal domain)	GO:0004177, GO:0006508, GO:0008233, GO:0008237, GO:0008270, GO:0016787, GO:0046872	84	2730	2	3	9.95084e-05	0.471376	-0.509945	UROBE1963355_EIv1.0_0000650	0.059633	0.08365	34
allind	UROBE1963355_EIv1.0_0000660	0	1	UROBE1963355_EIv1.0_0000660.1	Low	transposable_element_gene	Unknown protein	None	None	84	210	0	1	0	0.495238	NA	UROBE1963355_EIv1.0_0000660	0.019251	0.01303	24
allind	UROBE1963355_EIv1.0_0000670	0	1	UROBE1963355_EIv1.0_0000670.1	High	protein_coding_gene	Aldedh domain-containing protein	IPR016161 (Aldehyde/histidinol dehydrogenase)	GO:0016491, GO:0016620, GO:0055114	84	1521	2	3	0.000205009	0.537029	-0.350168	UROBE1963355_EIv1.0_0000670	0.035144	0.078189	34
allind	UROBE1963355_EIv1.0_0000680	0	1	UROBE1963355_EIv1.0_0000680.1	High	transposable_element_gene	Integrase catalytic domain-containing protein	IPR029472 (Gag-polypeptide of LTR copia-type)	GO:0000943, GO:0003676, GO:0015074	84	333	0	1	0	0.45946	NA	UROBE1963355_EIv1.0_0000680	0.075447	0.16533	28
allind	UROBE1963355_EIv1.0_0000690	0	4	UROBE1963355_EIv1.0_0000690.1	High	protein_coding_gene	ERCC4 domain-containing protein	IPR011335 (Restriction endonuclease type II-like)	GO:0003677, GO:0004518, GO:0090305	84	2862	3	4	0.000169491	0.442976	-0.354379	UROBE1963355_EIv1.0_0000690	0.18617	0.29406	28
allind	UROBE1963355_EIv1.0_0000700	0	2	UROBE1963355_EIv1.0_0000700.1	High	protein_coding_gene	Phosphatidylserine decarboxylase proenzyme 2	IPR000008 (C2 domain), IPR003817 (Phosphatidylserine decarboxylase-related), IPR011992 (EF-hand domain pair)	GO:0000139, GO:0004609, GO:0005509, GO:0005768, GO:0005794, GO:0005795, GO:0006629, GO:0006646, GO:0008654, GO:0010008, GO:0016020, GO:0016540, GO:0016829, GO:0016831	84	2619	1	2	0.000192775	0.447117	1.8135	UROBE1963355_EIv1.0_0000700	0.18054	0.41774	14
allind	UROBE1963355_EIv1.0_0000710	0	1	UROBE1963355_EIv1.0_0000710.1	Low	protein_coding_gene	Unknown protein	None	None	84	339	0	1	0	0.486726	NA	UROBE1963355_EIv1.0_0000710	0.12415	0.30252	10
allind	UROBE1963355_EIv1.0_0000720	0	2	UROBE1963355_EIv1.0_0000720.1	High	transposable_element_gene	Integrase catalytic domain-containing protein	None	None	84	747	0	1	0	0.429719	NA	UROBE1963355_EIv1.0_0000720	0.008963	0.0099636	47
allind	UROBE1963355_EIv1.0_0000730	0	1	UROBE1963355_EIv1.0_0000730.1	High	protein_coding_gene	Unknown protein	None	None	84	222	1	2	0.00126633	0.469219	0.482915	UROBE1963355_EIv1.0_0000730	0.034111	0.039037	26
allind	UROBE1963355_EIv1.0_0000740	0	1	UROBE1963355_EIv1.0_0000740.1	High	transposable_element_gene	RNase H domain-containing protein	None	GO:0003676, GO:0004523, GO:0090502	84	546	1	2	4.36072e-05	0.571407	-1.04726	UROBE1963355_EIv1.0_0000740	0.031169	0.035744	30
allind	UROBE1963355_EIv1.0_0000750	0	1	UROBE1963355_EIv1.0_0000750.1	High	transposable_element_gene	Integrase catalytic domain-containing protein	None	GO:0000943, GO:0003676, GO:0015074	84	681	2	3	0.000643649	0.476191	0.153131	UROBE1963355_EIv1.0_0000750	0.013234	0.017682	77
allind	UROBE1963355_EIv1.0_0000760	0	1	UROBE1963355_EIv1.0_0000760.1	Low	transposable_element_gene	Unknown protein	None	None	84	261	0	1	0	0.467433	NA	UROBE1963355_EIv1.0_0000760	0.11461	0.32583	13
allind	UROBE1963355_EIv1.0_0000770	0	1	UROBE1963355_EIv1.0_0000770.1	Low	transposable_element_gene	Unknown protein	None	None	84	211	0	1	0	0.49763	NA	UROBE1963355_EIv1.0_0000770	0.03441	0.076292	60
allind	UROBE1963355_EIv1.0_0000780	0	4	UROBE1963355_EIv1.0_0000780.1	High	protein_coding_gene	SAC domain-containing protein	IPR002013 (SAC domain), IPR022158 (Inositol phosphatase)	GO:0042578	84	3120	2	3	0.000166509	0.502751	0.47611	UROBE1963355_EIv1.0_0000780	0.042095	0.11609	36
allind	UROBE1963355_EIv1.0_0000790	0	2	UROBE1963355_EIv1.0_0000790.1	High	protein_coding_gene	DUF1691 domain-containing protein	None	GO:0016020, GO:0032592, GO:0055088	84	762	0	1	0	0.57874	NA	UROBE1963355_EIv1.0_0000790	0.058079	0.12981	10
allind	UROBE1963355_EIv1.0_0000800	0	2	UROBE1963355_EIv1.0_0000800.1	High	protein_coding_gene	Unplaced genomic scaffold K443scaffold_8, whole genome shotgun sequence	None	None	84	3387	2	3	0.000146183	0.541816	0.379103	UROBE1963355_EIv1.0_0000800	0.078281	0.081729	18
allind	UROBE1963355_EIv1.0_0000810	0	2	UROBE1963355_EIv1.0_0000810.1	High	protein_coding_gene	ATP-dependent RNA helicase	IPR001650 (Helicase, C-terminal), IPR014001 (Helicase superfamily 1/2, ATP-binding domain), IPR014014 (RNA helicase, DEAD-box type, Q motif), IPR027417 (P-loop containing nucleoside triphosphate hydrolase)	None	84	2625	2	3	0.000175286	0.473043	0.239868	UROBE1963355_EIv1.0_0000810	0.046527	0.063072	38
allind	UROBE1963355_EIv1.0_0000820	0	1	UROBE1963355_EIv1.0_0000820.1	High	transposable_element_gene	Integrase catalytic domain-containing protein	None	GO:0000943, GO:0003676, GO:0015074	84	201	0	1	0	0.437811	NA	UROBE1963355_EIv1.0_0000820	0.10635	0.091126	34
allind	UROBE1963355_EIv1.0_0000830	0	1	UROBE1963355_EIv1.0_0000830.1	Low	transposable_element_gene	Unknown protein	None	None	84	288	1	2	8.2672e-05	0.381903	-1.04726	UROBE1963355_EIv1.0_0000830	0.07276	0.12957	10
allind	UROBE1963355_EIv1.0_0000840	1	1	UROBE1963355_EIv1.0_0000840.1	Low	protein_coding_gene	Unknown protein	None	None	84	453	0	1	0	0.620309	NA	UROBE1963355_EIv1.0_0000840	0.076764	0.12398	12
allind	UROBE1963355_EIv1.0_0000850	0	2	UROBE1963355_EIv1.0_0000850.1	High	protein_coding_gene	2OG-FeII_Oxy_2 domain-containing protein	IPR027450 (Alpha-ketoglutarate-dependent dioxygenase AlkB-like), IPR032870 (Alpha-ketoglutarate-dependent dioxygenase alkB homologue 7)	GO:0005759, GO:0006974, GO:1902445	84	894	0	1	0	0.533557	NA	UROBE1963355_EIv1.0_0000850	0.080761	0.24127	17
allind	UROBE1963355_EIv1.0_0000860	0	1	UROBE1963355_EIv1.0_0000860.1	Low	protein_coding_gene	Unknown protein	None	None	84	411	0	1	0	0.508516	NA	UROBE1963355_EIv1.0_0000860	0.083656	0.24355	16
allind	UROBE1963355_EIv1.0_0000870	0	1	UROBE1963355_EIv1.0_0000870.1	High	transposable_element_gene	Integrase catalytic domain-containing protein	None	None	84	921	0	1	0	0.462541	NA	UROBE1963355_EIv1.0_0000870	0.08939	0.30243	15
allind	UROBE1963355_EIv1.0_0000880	0	1	UROBE1963355_EIv1.0_0000880.1	High	protein_coding_gene	6-phosphofructo-2-kinase / fructose-2,6-bisphosphatase	IPR027417 (P-loop containing nucleoside triphosphate hydrolase), IPR029033 (Histidine phosphatase superfamily)	GO:0003824, GO:0003873, GO:0005524, GO:0006000, GO:0006003, GO:0016301, GO:0016310, GO:0046835	84	1935	0	1	0	0.450129	NA	UROBE1963355_EIv1.0_0000880	0.061391	0.1456	6
allind	UROBE1963355_EIv1.0_0000890	0	5	UROBE1963355_EIv1.0_0000890.1	High	protein_coding_gene	54S ribosomal protein, mitochondrial	IPR002136 (Ribosomal protein L4/L1e), IPR023574 (Ribosomal protein L4 domain)	None	84	1032	0	1	0	0.569767	NA	UROBE1963355_EIv1.0_0000890	-0.018471	-0.022302	5
allind	UROBE1963355_EIv1.0_0000900	0	1	UROBE1963355_EIv1.0_0000900.1	High	protein_coding_gene	TAFII55_N domain-containing protein	IPR006751 (TAFII55 protein, conserved region)	GO:0005669, GO:0006367	84	1611	0	1	0	0.50031	NA	UROBE1963355_EIv1.0_0000900	-0.0057655	-0.0095788	9
allind	UROBE1963355_EIv1.0_0000910	0	1	UROBE1963355_EIv1.0_0000910.1	High	protein_coding_gene	EF-hand domain-containing protein	IPR006685 (Mechanosensitive ion channel MscS), IPR010920 (LSM domain), IPR011992 (EF-hand domain pair)	None	84	2580	0	1	0	0.454264	NA	UROBE1963355_EIv1.0_0000910	0.059145	0.12636	19
allind	UROBE1963355_EIv1.0_0000920	0	1	UROBE1963355_EIv1.0_0000920.1	High	protein_coding_gene	SGNH_hydro domain-containing protein	IPR013830 (SGNH hydrolase-type esterase domain)	None	84	828	0	1	0	0.557971	NA	UROBE1963355_EIv1.0_0000920	0.054417	0.19731	12
allind	UROBE1963355_EIv1.0_0000930	0	1	UROBE1963355_EIv1.0_0000930.1	High	protein_coding_gene	RRM domain-containing protein	IPR012677 (Nucleotide-binding alpha-beta plait domain)	GO:0003676	84	822	2	3	5.79307e-05	0.461071	-1.40128	UROBE1963355_EIv1.0_0000930	0.073697	0.32817	13
allind	UROBE1963355_EIv1.0_0000940	0	3	UROBE1963355_EIv1.0_0000940.1	High	protein_coding_gene	Mitochondrial fission process protein 1	IPR019560 (Mitochondrial 18kDa protein)	None	84	594	0	1	0	0.501683	NA	UROBE1963355_EIv1.0_0000940	0.093789	0.35115	18
allind	UROBE1963355_EIv1.0_0000950	0	1	UROBE1963355_EIv1.0_0000950.1	High	protein_coding_gene	Trehalose 6-phosphate phosphatase	IPR003337 (Trehalose-phosphatase), IPR023214 (HAD-like domain)	GO:0003824, GO:0004805, GO:0005992, GO:0016311, GO:0016787	84	951	0	1	0	0.458465	NA	UROBE1963355_EIv1.0_0000950	0.031018	0.026272	52
allind	UROBE1963355_EIv1.0_0000960	0	1	UROBE1963355_EIv1.0_0000960.1	High	transposable_element_gene	Integrase catalytic domain-containing protein	None	GO:0000943, GO:0003676, GO:0015074	84	405	0	1	0	0.441975	NA	UROBE1963355_EIv1.0_0000960	0.091905	0.38343	25
allind	UROBE1963355_EIv1.0_0000970	0	1	UROBE1963355_EIv1.0_0000970.1	High	transposable_element_gene	Integrase catalytic domain-containing protein	None	GO:0000943, GO:0003676, GO:0015074	84	306	1	2	7.78089e-05	0.395386	-1.04726	UROBE1963355_EIv1.0_0000970	0.19147	0.51787	18
allind	UROBE1963355_EIv1.0_0000980	0	1	UROBE1963355_EIv1.0_0000980.1	High	transposable_element_gene	DUF4219 domain-containing protein	None	None	84	342	0	1	0	0.467836	NA	UROBE1963355_EIv1.0_0000980	0.1535	0.45942	18
allind	UROBE1963355_EIv1.0_0000990	0	2	UROBE1963355_EIv1.0_0000990.1	High	transposable_element_gene	Integrase catalytic domain-containing protein	IPR013103 (Reverse transcriptase, RNA-dependent DNA polymerase)	GO:0000943, GO:0003676, GO:0015074	84	756	3	3	0.00106662	0.460333	0.638539	UROBE1963355_EIv1.0_0000990	0.24099	0.5349	17
allind	UROBE1963355_EIv1.0_0001000	0	1	UROBE1963355_EIv1.0_0001000.1	High	transposable_element_gene	Integrase catalytic domain-containing protein	None	GO:0000943, GO:0003676, GO:0015074	84	345	0	1	0	0.46087	NA	UROBE1963355_EIv1.0_0001000	0.23865	0.60517	13
allind	UROBE1963355_EIv1.0_0001010	0	2	UROBE1963355_EIv1.0_0001010.1	High	protein_coding_gene	Vacuolar abc heavy metal transporter	IPR003439 (ABC transporter-like), IPR011527 (ABC transporter type 1, transmembrane domain), IPR027417 (P-loop containing nucleoside triphosphate hydrolase)	GO:0000166, GO:0005524, GO:0016020, GO:0016021, GO:0016887, GO:0042626, GO:0055085	84	2844	2	3	2.49138e-05	0.474688	-1.30883	UROBE1963355_EIv1.0_0001010	-0.010101	-0.011729	17
allind	UROBE1963355_EIv1.0_0001020	0	1	UROBE1963355_EIv1.0_0001020.1	High	transposable_element_gene	Integrase catalytic domain-containing protein	None	GO:0000943, GO:0003676, GO:0015074	84	918	1	2	2.59363e-05	0.489094	-1.04726	UROBE1963355_EIv1.0_0001020	0.025194	0.039121	24
allind	UROBE1963355_EIv1.0_0001030	0	1	UROBE1963355_EIv1.0_0001030.1	High	transposable_element_gene	Integrase catalytic domain-containing protein	IPR013103 (Reverse transcriptase, RNA-dependent DNA polymerase)	GO:0000943, GO:0003676, GO:0015074	84	558	1	2	4.26694e-05	0.521484	-1.04726	UROBE1963355_EIv1.0_0001030	0.027053	0.039678	26
allind	UROBE1963355_EIv1.0_0001040	0	1	UROBE1963355_EIv1.0_0001040.1	High	protein_coding_gene	RRM domain-containing protein	IPR012677 (Nucleotide-binding alpha-beta plait domain)	None	84	624	0	1	0	0.559295	NA	UROBE1963355_EIv1.0_0001040	0.032217	0.12897	31
allind	UROBE1963355_EIv1.0_0001050	0	1	UROBE1963355_EIv1.0_0001050.1	High	transposable_element_gene	Integrase catalytic domain-containing protein	None	GO:0000943, GO:0003676, GO:0015074	84	699	1	2	0.000277012	0.513438	-0.037379	UROBE1963355_EIv1.0_0001050	0.11337	0.47739	12
allind	UROBE1963355_EIv1.0_0001060	0	1	UROBE1963355_EIv1.0_0001060.1	High	transposable_element_gene	Integrase catalytic domain-containing protein	IPR012337 (Ribonuclease H-like domain), IPR013103 (Reverse transcriptase, RNA-dependent DNA polymerase)	GO:0000943, GO:0003676, GO:0015074	84	1281	0	1	0	0.504293	NA	UROBE1963355_EIv1.0_0001060	0.10773	0.53694	16
allind	UROBE1963355_EIv1.0_0001070	0	1	UROBE1963355_EIv1.0_0001070.1	High	transposable_element_gene	Integrase catalytic domain-containing protein	None	None	84	1080	0	1	0	0.477778	NA	UROBE1963355_EIv1.0_0001070	0.23492	0.4606	27
allind	UROBE1963355_EIv1.0_0001080	0	1	UROBE1963355_EIv1.0_0001080.1	Low	protein_coding_gene	Acetyl CoA carboxylase	IPR029045 (ClpP/crotonase-like domain)	None	84	324	0	1	0	0.509259	NA	UROBE1963355_EIv1.0_0001080	0.11592	0.45029	10
allind	UROBE1963355_EIv1.0_0001090	0	2	UROBE1963355_EIv1.0_0001090.1	Low	transposable_element_gene	Unknown protein	None	None	84	690	0	1	0	0.442029	NA	UROBE1963355_EIv1.0_0001090	0.10381	0.43685	11
allind	UROBE1963355_EIv1.0_0001100	0	1	UROBE1963355_EIv1.0_0001100.1	Low	protein_coding_gene	Unknown protein	None	None	84	369	2	3	0.00102462	0.588076	-0.086535	UROBE1963355_EIv1.0_0001100	0.077591	0.33268	20
allind	UROBE1963355_EIv1.0_0001110	0	1	UROBE1963355_EIv1.0_0001110.1	High	transposable_element_gene	Integrase catalytic domain-containing protein	None	GO:0000943, GO:0003676, GO:0015074	84	252	0	1	0	0.464286	NA	UROBE1963355_EIv1.0_0001110	0.067615	0.14277	18
allind	UROBE1963355_EIv1.0_0001120	1	1	UROBE1963355_EIv1.0_0001120.1	High	protein_coding_gene	Cupredoxin	IPR008972 (Cupredoxin)	None	84	540	0	1	0	0.481482	NA	UROBE1963355_EIv1.0_0001120	0.076086	0.1046	17
allind	UROBE1963355_EIv1.0_0001130	0	2	UROBE1963355_EIv1.0_0001130.1	High	protein_coding_gene	Integrase catalytic domain-containing protein	None	GO:0000943, GO:0003676, GO:0015074	84	825	0	1	0	0.41697	NA	UROBE1963355_EIv1.0_0001130	0.084141	0.18648	9
allind	UROBE1963355_EIv1.0_0001140	0	1	UROBE1963355_EIv1.0_0001140.1	High	transposable_element_gene	Integrase catalytic domain-containing protein	IPR012337 (Ribonuclease H-like domain)	GO:0000943, GO:0003676, GO:0015074	84	495	0	1	0	0.430303	NA	UROBE1963355_EIv1.0_0001140	0.070661	0.17037	12
allind	UROBE1963355_EIv1.0_0001150	0	1	UROBE1963355_EIv1.0_0001150.1	High	transposable_element_gene	Reverse transcriptase Ty1/copia-type domain-containing protein	IPR013103 (Reverse transcriptase, RNA-dependent DNA polymerase)	None	84	817	1	2	0.000344094	0.424929	0.482915	UROBE1963355_EIv1.0_0001150	0.057962	0.15985	14
allind	UROBE1963355_EIv1.0_0001160	0	2	UROBE1963355_EIv1.0_0001160.1	Low	transposable_element_gene	Unknown protein	None	None	84	444	0	1	0	0.452703	NA	UROBE1963355_EIv1.0_0001160	0.052444	0.13725	12
allind	UROBE1963355_EIv1.0_0001170	0	1	UROBE1963355_EIv1.0_0001170.1	High	transposable_element_gene	Integrase catalytic domain-containing protein	IPR012337 (Ribonuclease H-like domain)	GO:0000943, GO:0003676, GO:0015074	84	506	0	1	0	0.523715	NA	UROBE1963355_EIv1.0_0001170	0.15972	0.35944	28
allind	UROBE1963355_EIv1.0_0001180	0	1	UROBE1963355_EIv1.0_0001180.1	Low	predicted_gene	Unknown protein	None	None	84	225	1	2	0.000503602	0.421958	-0.515026	UROBE1963355_EIv1.0_0001180	0.11074	0.29515	26
allind	UROBE1963355_EIv1.0_0001190	0	1	UROBE1963355_EIv1.0_0001190.1	Low	transposable_element_gene	Unknown protein	None	None	84	195	0	1	0	0.45641	NA	UROBE1963355_EIv1.0_0001190	0.10043	0.17858	24
allind	UROBE1963355_EIv1.0_0001200	0	1	UROBE1963355_EIv1.0_0001200.1	Low	transposable_element_gene	Unknown protein	None	None	84	228	0	1	0	0.45614	NA	UROBE1963355_EIv1.0_0001200	0.079067	0.13502	20
allind	UROBE1963355_EIv1.0_0001210	0	1	UROBE1963355_EIv1.0_0001210.1	High	transposable_element_gene	CxC1 domain-containing protein	None	None	84	834	1	2	2.85486e-05	0.428043	-1.04726	UROBE1963355_EIv1.0_0001210	0.095538	0.2263	28
allind	UROBE1963355_EIv1.0_0001220	0	1	UROBE1963355_EIv1.0_0001220.1	High	transposable_element_gene	Integrase catalytic domain-containing protein	IPR012337 (Ribonuclease H-like domain)	GO:0000943, GO:0003676, GO:0015074	84	1176	2	3	0.000118062	0.489755	-1.03835	UROBE1963355_EIv1.0_0001220	0.094204	0.16246	28
allind	UROBE1963355_EIv1.0_0001230	0	1	UROBE1963355_EIv1.0_0001230.1	Low	transposable_element_gene	Integrase catalytic domain-containing protein	None	GO:0000943, GO:0003676, GO:0015074	84	603	0	1	0	0.562189	NA	UROBE1963355_EIv1.0_0001230	0.09756	0.2902	18
allind	UROBE1963355_EIv1.0_0001240	0	1	UROBE1963355_EIv1.0_0001240.1	High	transposable_element_gene	Integrase catalytic domain-containing protein	None	GO:0000943, GO:0003676, GO:0015074	84	672	0	1	0	0.525298	NA	UROBE1963355_EIv1.0_0001240	0.14284	0.26834	11
allind	UROBE1963355_EIv1.0_0001250	0	1	UROBE1963355_EIv1.0_0001250.1	High	protein_coding_gene	DNA replication licensing factor MCM7	IPR008050 (DNA replication licensing factor Mcm7), IPR027417 (P-loop containing nucleoside triphosphate hydrolase), IPR027925 (MCM N-terminal domain), IPR031327 (Mini-chromosome maintenance protein), IPR033762 (MCM OB domain)	GO:0000166, GO:0000727, GO:0000781, GO:0003677, GO:0003678, GO:0003682, GO:0003688, GO:0003697, GO:0004003, GO:0004386, GO:0005524, GO:0005634, GO:0005656, GO:0005737, GO:0006260, GO:0006267, GO:0006268, GO:0006270, GO:0006271, GO:0006348, GO:0007049, GO:0016787, GO:0017116, GO:0030466, GO:0031261, GO:0031298, GO:0033260, GO:0042555, GO:0043140, GO:0043142, GO:0071162, GO:0097373, GO:1904931, GO:…	84	2433	1	2	9.78608e-06	0.47555	-1.04726	UROBE1963355_EIv1.0_0001250	0.26325	0.93391	5
allind	UROBE1963355_EIv1.0_0001260	0	1	UROBE1963355_EIv1.0_0001260.1	Low	predicted_gene	Unknown protein	None	None	84	294	1	2	8.09848e-05	0.489755	-1.04726	UROBE1963355_EIv1.0_0001260	0.24423	0.65255	6
allind	UROBE1963355_EIv1.0_0001270	0	1	UROBE1963355_EIv1.0_0001270.1	High	protein_coding_gene	Unknown protein	None	None	84	840	0	1	0	0.496429	NA	UROBE1963355_EIv1.0_0001270	0.040003	0.094657	8
allind	UROBE1963355_EIv1.0_0001280	0	1	UROBE1963355_EIv1.0_0001280.1	Low	predicted_gene	Unknown protein	None	None	84	231	0	1	0	0.476191	NA	UROBE1963355_EIv1.0_0001280	0.22764	0.70516	11
allind	UROBE1963355_EIv1.0_0001290	0	1	UROBE1963355_EIv1.0_0001290.1	High	transposable_element_gene	Integrase catalytic domain-containing protein	IPR013103 (Reverse transcriptase, RNA-dependent DNA polymerase)	None	84	1680	1	2	0.000276617	0.479975	1.57468	UROBE1963355_EIv1.0_0001290	0.15897	0.46341	25
allind	UROBE1963355_EIv1.0_0001300	0	1	UROBE1963355_EIv1.0_0001300.1	High	transposable_element_gene	Integrase catalytic domain-containing protein	None	None	84	696	0	1	0	0.438218	NA	UROBE1963355_EIv1.0_0001300	0.14815	0.35482	22
allind	UROBE1963355_EIv1.0_0001310	0	1	UROBE1963355_EIv1.0_0001310.1	High	transposable_element_gene	Integrase catalytic domain-containing protein	IPR012337 (Ribonuclease H-like domain)	GO:0000943, GO:0003676, GO:0015074	84	1719	1	2	8.99468e-05	0.447886	-0.269379	UROBE1963355_EIv1.0_0001310	0.16814	0.34735	23
allind	UROBE1963355_EIv1.0_0001320	1	1	UROBE1963355_EIv1.0_0001320.1	High	protein_coding_gene	Unknown protein	None	None	84	741	0	1	0	0.500675	NA	UROBE1963355_EIv1.0_0001320	0.17944	0.46462	23
allind	UROBE1963355_EIv1.0_0001330	0	1	UROBE1963355_EIv1.0_0001330.1	High	transposable_element_gene	Integrase catalytic domain-containing protein	None	GO:0000943, GO:0003676, GO:0015074	84	651	0	1	0	0.494624	NA	UROBE1963355_EIv1.0_0001330	0.057507	0.30804	30
allind	UROBE1963355_EIv1.0_0001340	0	2	UROBE1963355_EIv1.0_0001340.1	High	transposable_element_gene	Integrase catalytic domain-containing protein	None	GO:0000943, GO:0003676, GO:0015074	84	423	0	1	0	0.449173	NA	UROBE1963355_EIv1.0_0001340	0.11182	0.37168	48
allind	UROBE1963355_EIv1.0_0001350	0	1	UROBE1963355_EIv1.0_0001350.1	Low	transposable_element_gene	Unknown protein	None	None	84	291	4	5	0.00246642	0.398748	-0.209591	UROBE1963355_EIv1.0_0001350	0.034239	0.065323	66
allind	UROBE1963355_EIv1.0_0001360	0	1	UROBE1963355_EIv1.0_0001360.1	High	protein_coding_gene	Unknown protein	None	None	84	1641	2	3	4.31778e-05	0.522874	-1.30883	UROBE1963355_EIv1.0_0001360	0.23963	0.76974	10
allind	UROBE1963355_EIv1.0_0001370	0	2	UROBE1963355_EIv1.0_0001370.1	High	protein_coding_gene	Phospho-2-dehydro-3-deoxyheptonate aldolase	IPR006219 (DHAP synthase, class 1), IPR013785 (Aldolase-type TIM barrel)	GO:0003824, GO:0003849, GO:0008652, GO:0009058, GO:0009073, GO:0016740	84	1320	2	3	0.000203411	0.519589	-0.522499	UROBE1963355_EIv1.0_0001370	0.085036	0.14495	140
allind	UROBE1963355_EIv1.0_0001380	0	2	UROBE1963355_EIv1.0_0001380.1	Low	transposable_element_gene	Unknown protein	None	None	84	228	0	1	0	0.350877	NA	UROBE1963355_EIv1.0_0001380	0.18066	0.50546	29
allind	UROBE1963355_EIv1.0_0001390	0	1	UROBE1963355_EIv1.0_0001390.1	High	protein_coding_gene	Phosphatidylinositol-4-kinase	IPR015433 (Phosphatidylinositol kinase), IPR016024 (Armadillo-type fold)	None	84	5985	1	2	7.22786e-05	0.450794	1.38362	UROBE1963355_EIv1.0_0001390	0.3535	0.68148	9
allind	UROBE1963355_EIv1.0_0001400	0	4	UROBE1963355_EIv1.0_0001400.1	High	protein_coding_gene	U3-containing 90S pre-ribosomal complex subunit-domain containing protein	IPR027417 (P-loop containing nucleoside triphosphate hydrolase), IPR032704 (Protein Cms1)	None	84	1221	0	1	0	0.472564	NA	UROBE1963355_EIv1.0_0001400	0.39422	0.64882	5
allind	UROBE1963355_EIv1.0_0001410	0	1	UROBE1963355_EIv1.0_0001410.1	High	transposable_element_gene	CCHC-type domain-containing protein	IPR001878 (Zinc finger, CCHC-type)	GO:0003676, GO:0008270	84	510	0	1	0	0.519608	NA	UROBE1963355_EIv1.0_0001410	0.094808	0.25856	13
allind	UROBE1963355_EIv1.0_0001420	0	1	UROBE1963355_EIv1.0_0001420.1	Low	transposable_element_gene	Unknown protein	None	None	84	296	0	1	0	0.425676	NA	UROBE1963355_EIv1.0_0001420	0.062882	0.25239	6
allind	UROBE1963355_EIv1.0_0001430	0	1	UROBE1963355_EIv1.0_0001430.1	High	transposable_element_gene	Integrase catalytic domain-containing protein	IPR001878 (Zinc finger, CCHC-type)	GO:0003676, GO:0008270, GO:0015074	84	732	0	1	0	0.516393	NA	UROBE1963355_EIv1.0_0001430	0.11446	0.2728	7
allind	UROBE1963355_EIv1.0_0001440	0	1	UROBE1963355_EIv1.0_0001440.1	High	transposable_element_gene	Reverse transcriptase Ty1/copia-type domain-containing protein	IPR013103 (Reverse transcriptase, RNA-dependent DNA polymerase)	None	84	525	1	2	4.53515e-05	0.417166	-1.04726	UROBE1963355_EIv1.0_0001440	0.20697	0.49233	14
allind	UROBE1963355_EIv1.0_0001450	0	2	UROBE1963355_EIv1.0_0001450.1	High	transposable_element_gene	DUF4219 domain-containing protein	None	None	84	285	0	1	0	0.421053	NA	UROBE1963355_EIv1.0_0001450	0.08927	0.1851	19
allind	UROBE1963355_EIv1.0_0001460	0	1	UROBE1963355_EIv1.0_0001460.1	High	protein_coding_gene	Iso_dh domain-containing protein	IPR024084 (Isopropylmalate dehydrogenase-like domain)	GO:0000287, GO:0016616, GO:0051287, GO:0055114	84	903	0	1	0	0.566999	NA	UROBE1963355_EIv1.0_0001460	0.11452	0.15236	14
allind	UROBE1963355_EIv1.0_0001470	0	1	UROBE1963355_EIv1.0_0001470.1	Low	protein_coding_gene	Integrase catalytic domain-containing protein	IPR013103 (Reverse transcriptase, RNA-dependent DNA polymerase)	GO:0000943, GO:0003676, GO:0015074	84	300	0	1	0	0.536667	NA	UROBE1963355_EIv1.0_0001470	0.10685	0.14947	15
allind	UROBE1963355_EIv1.0_0001480	0	1	UROBE1963355_EIv1.0_0001480.1	Low	transposable_element_gene	Unknown protein	None	None	84	288	0	1	0	0.555556	NA	UROBE1963355_EIv1.0_0001480	0.088776	0.12731	15
allind	UROBE1963355_EIv1.0_0001490	0	3	UROBE1963355_EIv1.0_0001490.1	High	protein_coding_gene	ARM repeat-containing protein	IPR016024 (Armadillo-type fold), IPR021841 (Vacuolar protein 14 C-terminal Fig4-binding domain), IPR026825 (Vacuole morphology and inheritance protein 14), IPR032878 (Vacuole morphology and inheritance protein 14, Fab1-binding region)	GO:0006661, GO:0070772	84	3495	2	3	1.36249e-05	0.471524	-1.40128	UROBE1963355_EIv1.0_0001490	0.093604	0.12802	22
allind	UROBE1963355_EIv1.0_0001500	0	1	UROBE1963355_EIv1.0_0001500.1	High	transposable_element_gene	Integrase catalytic domain-containing protein	None	None	84	474	0	1	0	0.485232	NA	UROBE1963355_EIv1.0_0001500	0.039003	0.085793	34
allind	UROBE1963355_EIv1.0_0001510	0	1	UROBE1963355_EIv1.0_0001510.1	Low	transposable_element_gene	Unknown protein	None	None	84	372	1	2	6.40041e-05	0.599462	-1.04726	UROBE1963355_EIv1.0_0001510	0.025172	0.065235	30
allind	UROBE1963355_EIv1.0_0001520	0	2	UROBE1963355_EIv1.0_0001520.1	High	protein_coding_gene	MPN domain-containing protein	IPR005366 (ER membrane protein complex subunit 8/9)	GO:0072546	84	552	0	1	0	0.472826	NA	UROBE1963355_EIv1.0_0001520	0.1303	0.24038	12
allind	UROBE1963355_EIv1.0_0001530	0	1	UROBE1963355_EIv1.0_0001530.1	High	transposable_element_gene	Integrase catalytic domain-containing protein	None	GO:0000943, GO:0003676, GO:0015074	84	567	0	1	0	0.514991	NA	UROBE1963355_EIv1.0_0001530	0.10969	0.19541	17
allind	UROBE1963355_EIv1.0_0001540	0	2	UROBE1963355_EIv1.0_0001540.1	High	transposable_element_gene	Integrase catalytic domain-containing protein	IPR029472 (Gag-polypeptide of LTR copia-type)	GO:0000943, GO:0003676, GO:0015074	84	570	1	2	4.17711e-05	0.436821	-1.04726	UROBE1963355_EIv1.0_0001540	0.065718	0.094148	8
allind	UROBE1963355_EIv1.0_0001550	0	1	UROBE1963355_EIv1.0_0001550.1	Low	transposable_element_gene	Integrase catalytic domain-containing protein	None	GO:0000943, GO:0003676, GO:0008270, GO:0015074	84	720	0	1	0	0.476389	NA	UROBE1963355_EIv1.0_0001550	0.093661	0.34934	6
allind	UROBE1963355_EIv1.0_0001560	0	1	UROBE1963355_EIv1.0_0001560.1	High	transposable_element_gene	Integrase catalytic domain-containing protein	None	GO:0000943, GO:0003676, GO:0008270, GO:0015074	84	396	0	1	0	0.424242	NA	UROBE1963355_EIv1.0_0001560	0.014686	0.015446	5
allind	UROBE1963355_EIv1.0_0001570	0	1	UROBE1963355_EIv1.0_0001570.1	Low	transposable_element_gene	Unknown protein	None	None	84	234	0	1	0	0.491453	NA	UROBE1963355_EIv1.0_0001570	0.037119	0.05806	11
allind	UROBE1963355_EIv1.0_0001580	0	1	UROBE1963355_EIv1.0_0001580.1	High	protein_coding_gene	Family 5 glycoside hydrolase	IPR017853 (Glycoside hydrolase superfamily)	GO:0016787	84	1614	2	3	4.39002e-05	0.548334	-1.30883	UROBE1963355_EIv1.0_0001580	0.030042	0.047188	13
allind	UROBE1963355_EIv1.0_0001590	0	1	UROBE1963355_EIv1.0_0001590.1	High	transposable_element_gene	Retrotransposable element Tf2 155 kDa protein type 1	IPR000477 (Reverse transcriptase domain), IPR012337 (Ribonuclease H-like domain)	GO:0003676, GO:0008270, GO:0015074	84	2397	4	5	0.000186215	0.522786	-0.90371	UROBE1963355_EIv1.0_0001590	0.01833	0.015653	42
allind	UROBE1963355_EIv1.0_0001600	0	1	UROBE1963355_EIv1.0_0001600.1	High	transposable_element_gene	Reverse transcriptase domain-containing protein	None	None	84	681	1	2	3.49626e-05	0.602073	-1.04726	UROBE1963355_EIv1.0_0001600	0.02456	0.017053	38
allind	UROBE1963355_EIv1.0_0001610	0	1	UROBE1963355_EIv1.0_0001610.1	High	transposable_element_gene	Retrotrans_gag domain-containing protein	IPR005162 (Retrotransposon gag domain), IPR032567 (LDOC1-related)	None	84	438	0	1	0	0.488584	NA	UROBE1963355_EIv1.0_0001610	0.073455	0.10569	25
allind	UROBE1963355_EIv1.0_0001620	0	2	UROBE1963355_EIv1.0_0001620.1	High	transposable_element_gene	Integrase catalytic domain-containing protein	None	GO:0000943, GO:0003676, GO:0015074	84	990	1	2	2.405e-05	0.494937	-1.04726	UROBE1963355_EIv1.0_0001620	0.2641	0.68492	57
allind	UROBE1963355_EIv1.0_0001630	0	2	UROBE1963355_EIv1.0_0001630.1	Low	transposable_element_gene	Unknown protein	None	None	84	348	0	1	0	0.416667	NA	UROBE1963355_EIv1.0_0001630	0.2237	0.53073	22
allind	UROBE1963355_EIv1.0_0001640	0	1	UROBE1963355_EIv1.0_0001640.1	Low	predicted_gene	Unknown protein	None	None	84	153	0	1	0	0.490196	NA	UROBE1963355_EIv1.0_0001640	0.19203	0.47205	21
allind	UROBE1963355_EIv1.0_0001650	0	2	UROBE1963355_EIv1.0_0001650.1	High	protein_coding_gene	Peptidyl-prolyl cis-trans isomerase	IPR002130 (Cyclophilin-type peptidyl-prolyl cis-trans isomerase domain), IPR024936 (Cyclophilin-type peptidyl-prolyl cis-trans isomerase), IPR029000 (Cyclophilin-like domain)	GO:0000413, GO:0003755, GO:0006457, GO:0016853	84	501	4	10	0.00153795	0.475002	-0.074582	UROBE1963355_EIv1.0_0001650	0.12715	0.2544	18
allind	UROBE1963355_EIv1.0_0001660	1	2	UROBE1963355_EIv1.0_0001660.1	High	protein_coding_gene	CSEP-06	None	None	84	681	1	2	0.000557295	0.492291	1.06803	UROBE1963355_EIv1.0_0001660	0.31559	0.79695	29
allind	UROBE1963355_EIv1.0_0001670	0	1	UROBE1963355_EIv1.0_0001670.1	Low	predicted_gene	Unknown protein	None	None	84	396	2	3	0.000236154	0.462181	-1.21867	UROBE1963355_EIv1.0_0001670	0.25413	0.63471	28
allind	UROBE1963355_EIv1.0_0001680	0	1	UROBE1963355_EIv1.0_0001680.1	High	transposable_element_gene	Integrase catalytic domain-containing protein	None	GO:0000943, GO:0003676, GO:0015074	84	405	2	3	0.00219007	0.441975	1.93807	UROBE1963355_EIv1.0_0001680	0.26197	0.65079	25
allind	UROBE1963355_EIv1.0_0001690	0	3	UROBE1963355_EIv1.0_0001690.1	High	protein_coding_gene	Six-hairpin glycosidase	IPR008928 (Six-hairpin glycosidase-like), IPR010905 (Glycosyl hydrolase, family 88)	GO:0003824, GO:0008152, GO:0016798	84	1473	2	3	0.000529711	0.544111	1.51352	UROBE1963355_EIv1.0_0001690	0.11083	0.18818	31
allind	UROBE1963355_EIv1.0_0001700	0	1	UROBE1963355_EIv1.0_0001700.1	Low	predicted_gene	Unknown protein	None	None	84	186	2	3	0.00311538	0.445597	0.714635	UROBE1963355_EIv1.0_0001700	0.1164	0.22343	23
allind	UROBE1963355_EIv1.0_0001710	0	1	UROBE1963355_EIv1.0_0001710.1	Low	predicted_gene	Unknown protein	None	None	84	210	0	1	0	0.571429	NA	UROBE1963355_EIv1.0_0001710	0.08997	0.16736	15
allind	UROBE1963355_EIv1.0_0001720	0	2	UROBE1963355_EIv1.0_0001720.1	High	protein_coding_gene	WD_REPEATS_REGION domain-containing protein	IPR015943 (WD40/YVTN repeat-like-containing domain)	None	84	2205	2	3	3.21337e-05	0.497965	-1.30883	UROBE1963355_EIv1.0_0001720	0.096105	0.17125	14
allind	UROBE1963355_EIv1.0_0001730	0	1	UROBE1963355_EIv1.0_0001730.1	High	protein_coding_gene	Unknown protein	None	None	84	900	4	5	0.00121151	0.437077	0.743539	UROBE1963355_EIv1.0_0001730	0.11454	0.17153	7
allind	UROBE1963355_EIv1.0_0001740	0	2	UROBE1963355_EIv1.0_0001740.1	High	protein_coding_gene	SGT1-domain-containing protein	IPR010770 (Ecd family)	None	84	2703	0	1	0	0.474658	NA	UROBE1963355_EIv1.0_0001740	0.031505	0.03716	73
allind	UROBE1963355_EIv1.0_0001750	0	1	UROBE1963355_EIv1.0_0001750.1	High	protein_coding_gene	Cutinase domain-containing protein	IPR029058 (Alpha/Beta hydrolase fold)	None	84	984	1	2	0.000385689	0.53252	1.06803	UROBE1963355_EIv1.0_0001750	0.12438	0.2067	19
allind	UROBE1963355_EIv1.0_0001760	0	1	UROBE1963355_EIv1.0_0001760.1	High	transposable_element_gene	Reverse transcriptase domain-containing protein	IPR000477 (Reverse transcriptase domain)	None	84	3417	3	4	3.43361e-05	0.499861	-1.49091	UROBE1963355_EIv1.0_0001760	0.05011	0.065622	23
allind	UROBE1963355_EIv1.0_0001770	0	1	UROBE1963355_EIv1.0_0001770.1	High	transposable_element_gene	Integrase catalytic domain-containing protein	IPR012337 (Ribonuclease H-like domain)	GO:0003676, GO:0015074	84	678	1	2	0.000559761	0.501844	1.06803	UROBE1963355_EIv1.0_0001770	0.050581	0.062662	31
allind	UROBE1963355_EIv1.0_0001780	0	1	UROBE1963355_EIv1.0_0001780.1	Low	predicted_gene	Unknown protein	None	None	84	258	0	1	0	0.507752	NA	UROBE1963355_EIv1.0_0001780	0.067684	0.14417	23
allind	UROBE1963355_EIv1.0_0001790	0	3	UROBE1963355_EIv1.0_0001790.1	High	protein_coding_gene	CK1/CK1/CK1-G protein kinase	IPR011009 (Protein kinase-like domain)	GO:0004672, GO:0005524, GO:0006468, GO:0016301, GO:0016310	84	1551	10	11	0.000757197	0.505772	-1.08222	UROBE1963355_EIv1.0_0001790	0.061509	0.14145	32
allind	UROBE1963355_EIv1.0_0001800	0	1	UROBE1963355_EIv1.0_0001800.1	Low	transposable_element_gene	CCHC-type domain-containing protein	IPR001878 (Zinc finger, CCHC-type)	GO:0000943, GO:0003676, GO:0008270	84	312	1	2	0.00117687	0.502442	0.994679	UROBE1963355_EIv1.0_0001800	0.061614	0.090324	66
allind	UROBE1963355_EIv1.0_0001810	0	3	UROBE1963355_EIv1.0_0001810.1	High	protein_coding_gene	OPT oligopeptide transporter	IPR004813 (Oligopeptide transporter, OPT superfamily)	None	84	2373	2	3	2.98588e-05	0.479577	-1.30883	UROBE1963355_EIv1.0_0001810	0.34159	0.72538	15
allind	UROBE1963355_EIv1.0_0001820	0	1	UROBE1963355_EIv1.0_0001820.1	Low	transposable_element_gene	Integrase catalytic domain-containing protein	None	GO:0000943, GO:0003676, GO:0015074	84	203	0	1	0	0.512315	NA	UROBE1963355_EIv1.0_0001820	0.20914	0.63759	9
allind	UROBE1963355_EIv1.0_0001830	0	1	UROBE1963355_EIv1.0_0001830.1	High	transposable_element_gene	DUF4219 domain-containing protein	None	None	84	175	0	1	0	0.422857	NA	UROBE1963355_EIv1.0_0001830	0.25722	0.59083	12
allind	UROBE1963355_EIv1.0_0001840	0	2	UROBE1963355_EIv1.0_0001840.1	High	protein_coding_gene	Unknown protein	None	None	84	426	1	2	5.58909e-05	0.575145	-1.04726	UROBE1963355_EIv1.0_0001840	0.23609	0.52912	10
allind	UROBE1963355_EIv1.0_0001850	0	1	UROBE1963355_EIv1.0_0001850.1	Low	transposable_element_gene	Unknown protein	None	None	84	183	0	1	0	0.431694	NA	UROBE1963355_EIv1.0_0001850	0.16621	0.34399	41
allind	UROBE1963355_EIv1.0_0001860	0	1	UROBE1963355_EIv1.0_0001860.1	High	protein_coding_gene	Mitochondrial matrix Mmp37-domain-containing protein	IPR015222 (Mitochondrial matrix Mmp37)	None	84	258	0	1	0	0.488372	NA	UROBE1963355_EIv1.0_0001860	0.1688	0.34901	45
allind	UROBE1963355_EIv1.0_0001870	0	1	UROBE1963355_EIv1.0_0001870.1	Low	transposable_element_gene	Unknown protein	None	None	84	162	0	1	0	0.41358	NA	UROBE1963355_EIv1.0_0001870	0.28539	0.50261	15
allind	UROBE1963355_EIv1.0_0001880	0	3	UROBE1963355_EIv1.0_0001880.1	High	protein_coding_gene	PH domain-containing protein	IPR011993 (PH domain-like)	GO:0005543, GO:0005938, GO:0032065	84	6603	5	3	2.49804e-05	0.528708	-1.83176	UROBE1963355_EIv1.0_0001880	0.022736	0.029267	44
allind	UROBE1963355_EIv1.0_0001890	0	1	UROBE1963355_EIv1.0_0001890.1	High	transposable_element_gene	Integrase catalytic domain-containing protein	IPR029472 (Gag-polypeptide of LTR copia-type)	GO:0000943, GO:0003676, GO:0015074	84	210	1	2	0.00168702	0.43441	0.917915	UROBE1963355_EIv1.0_0001890	0.097307	0.23574	14
allind	UROBE1963355_EIv1.0_0001900	0	1	UROBE1963355_EIv1.0_0001900.1	High	transposable_element_gene	Integrase catalytic domain-containing protein	None	GO:0000943, GO:0003676, GO:0015074	84	414	0	1	0	0.415459	NA	UROBE1963355_EIv1.0_0001900	0.11632	0.28392	33
allind	UROBE1963355_EIv1.0_0001910	0	2	UROBE1963355_EIv1.0_0001910.1	High	protein_coding_gene	SNF2 family helicase/atpase	IPR000330 (SNF2-related, N-terminal domain), IPR001650 (Helicase, C-terminal), IPR027417 (P-loop containing nucleoside triphosphate hydrolase)	GO:0004386, GO:0005524	84	2268	2	3	5.09723e-05	0.481901	-1.13079	UROBE1963355_EIv1.0_0001910	0.060406	0.1544	23
allind	UROBE1963355_EIv1.0_0001920	0	1	UROBE1963355_EIv1.0_0001920.1	Low	predicted_gene	Unknown protein	None	None	84	201	1	2	0.00227634	0.396292	1.53203	UROBE1963355_EIv1.0_0001920	0.092619	0.19141	14
allind	UROBE1963355_EIv1.0_0001930	0	2	UROBE1963355_EIv1.0_0001930.1	High	protein_coding_gene	DNA primase	IPR002755 (DNA primase, small subunit)	None	84	1521	1	2	3.09305e-05	0.474015	-0.909084	UROBE1963355_EIv1.0_0001930	0.083909	0.19268	13
allind	UROBE1963355_EIv1.0_0001940	0	2	UROBE1963355_EIv1.0_0001940.1	High	protein_coding_gene	TPT domain-containing protein	IPR004853 (Sugar phosphate transporter domain)	GO:0016020, GO:0016021	84	1797	1	2	3.8791e-05	0.53478	-0.774319	UROBE1963355_EIv1.0_0001940	0.029338	0.025111	34
allind	UROBE1963355_EIv1.0_0001950	0	2	UROBE1963355_EIv1.0_0001950.1	High	protein_coding_gene	WD_REPEATS_REGION domain-containing protein	IPR015943 (WD40/YVTN repeat-like-containing domain), IPR020472 (G-protein beta WD-40 repeat)	GO:0005053, GO:0005777, GO:0005829, GO:0016560	84	1005	0	1	0	0.506468	NA	UROBE1963355_EIv1.0_0001950	0.026898	0.0094874	35
allind	UROBE1963355_EIv1.0_0001960	0	2	UROBE1963355_EIv1.0_0001960.1	High	protein_coding_gene	GPI-anchor transamidase	IPR001096 (Peptidase C13, legumain)	GO:0003923, GO:0006506, GO:0006508, GO:0008233, GO:0008234, GO:0016255, GO:0016787, GO:0042765	84	1134	1	2	2.09961e-05	0.476201	-1.04726	UROBE1963355_EIv1.0_0001960	0.073477	0.10278	25
allind	UROBE1963355_EIv1.0_0001970	0	10	UROBE1963355_EIv1.0_0001970.1	High	protein_coding_gene	PX domain-containing protein	IPR001683 (Phox homologous domain), IPR011992 (EF-hand domain pair)	GO:0035091	84	1992	2	3	4.69462e-05	0.523612	-1.21867	UROBE1963355_EIv1.0_0001970	0.11738	0.32036	16
allind	UROBE1963355_EIv1.0_0001980	0	2	UROBE1963355_EIv1.0_0001980.1	High	protein_coding_gene	INCENP_ARK-bind domain-containing protein	IPR005635 (Inner centromere protein, ARK-binding domain)	GO:0000070, GO:1902412	84	4698	3	4	7.65697e-05	0.494471	-0.741794	UROBE1963355_EIv1.0_0001980	0.048949	0.063273	34
allind	UROBE1963355_EIv1.0_0001990	0	1	UROBE1963355_EIv1.0_0001990.1	High	transposable_element_gene	Integrase catalytic domain-containing protein	None	GO:0000943, GO:0003676, GO:0015074	84	942	1	2	0.000346853	0.50297	0.75415	UROBE1963355_EIv1.0_0001990	0.16597	0.3633	27
allind	UROBE1963355_EIv1.0_0002000	1	1	UROBE1963355_EIv1.0_0002000.1	High	protein_coding_gene	DPBB_1 domain-containing protein	IPR009009 (RlpA-like protein, double-psi beta-barrel domain)	GO:0042742, GO:0050832	84	393	1	2	0.000177373	0.582788	-0.774319	UROBE1963355_EIv1.0_0002000	0.036645	0.10121	9
allind	UROBE1963355_EIv1.0_0002010	0	1	UROBE1963355_EIv1.0_0002010.1	High	protein_coding_gene	SGF29 C-terminal domain-containing protein	IPR010750 (SGF29 tudor-like domain)	GO:0000124	84	1062	0	1	0	0.555556	NA	UROBE1963355_EIv1.0_0002010	0.019197	0.10663	9
allind	UROBE1963355_EIv1.0_0002020	0	1	UROBE1963355_EIv1.0_0002020.1	High	transposable_element_gene	Integrase catalytic domain-containing protein	None	GO:0000943, GO:0003676, GO:0015074	84	1284	1	2	3.66397e-05	0.482847	-0.909084	UROBE1963355_EIv1.0_0002020	0.10829	0.30599	18
allind	UROBE1963355_EIv1.0_0002030	0	1	UROBE1963355_EIv1.0_0002030.1	High	transposable_element_gene	CCHC-type domain-containing protein	None	None	84	978	0	1	0	0.4591	NA	UROBE1963355_EIv1.0_0002030	0.080408	0.10899	41
allind	UROBE1963355_EIv1.0_0002040	0	1	UROBE1963355_EIv1.0_0002040.1	High	protein_coding_gene	Unknown protein	None	None	84	558	0	1	0	0.401434	NA	UROBE1963355_EIv1.0_0002040	0.034848	0.1685	12
allind	UROBE1963355_EIv1.0_0002050	0	2	UROBE1963355_EIv1.0_0002050.1	High	transposable_element_gene	Integrase catalytic domain-containing protein	None	GO:0000943, GO:0003676, GO:0015074	84	627	0	1	0	0.610845	NA	UROBE1963355_EIv1.0_0002050	0.072169	0.12768	43
allind	UROBE1963355_EIv1.0_0002060	0	1	UROBE1963355_EIv1.0_0002060.1	High	transposable_element_gene	Integrase catalytic domain-containing protein	IPR013103 (Reverse transcriptase, RNA-dependent DNA polymerase)	GO:0000943, GO:0003676, GO:0015074	84	1140	0	1	0	0.430702	NA	UROBE1963355_EIv1.0_0002060	0.12636	0.30861	7
allind	UROBE1963355_EIv1.0_0002070	0	4	UROBE1963355_EIv1.0_0002070.1	High	protein_coding_gene	Palmitoyltransferase	IPR001594 (Palmitoyltransferase, DHHC domain)	GO:0016020, GO:0016021, GO:0016740, GO:0016746, GO:0019706	84	1692	0	1	0	0.527187	NA	UROBE1963355_EIv1.0_0002070	0.07172	0.21849	10
allind	UROBE1963355_EIv1.0_0002080	0	1	UROBE1963355_EIv1.0_0002080.1	High	protein_coding_gene	TPR_MLP1_2 domain-containing protein	IPR012929 (Nucleoprotein TPR/MLP1)	GO:0005623, GO:0006606	84	6276	4	6	0.000122405	0.484918	-0.080452	UROBE1963355_EIv1.0_0002080	0.062581	0.16994	39
allind	UROBE1963355_EIv1.0_0002090	0	1	UROBE1963355_EIv1.0_0002090.1	Low	protein_coding_gene	Unknown protein	None	None	84	423	1	2	0.000164793	0.536559	-0.774319	UROBE1963355_EIv1.0_0002090	0.055919	0.13442	35
allind	UROBE1963355_EIv1.0_0002100	0	1	UROBE1963355_EIv1.0_0002100.1	High	protein_coding_gene	Cell division control protein 48	IPR003959 (ATPase, AAA-type, core), IPR005938 (AAA ATPase, CDC48 family), IPR009010 (Aspartate decarboxylase-like domain), IPR015415 (Vps4 oligomerisation, C-terminal), IPR027417 (P-loop containing nucleoside triphosphate hydrolase), IPR029067 (CDC48 domain 2-like)	GO:0000166, GO:0005524, GO:0016787, GO:0051301	84	2451	28	19	0.000866905	0.495629	-1.91317	UROBE1963355_EIv1.0_0002100	0.056607	0.12902	34
allind	UROBE1963355_EIv1.0_0002110	0	1	UROBE1963355_EIv1.0_0002110.1	Low	protein_coding_gene	Unknown protein	None	None	84	219	0	1	0	0.465753	NA	UROBE1963355_EIv1.0_0002110	0.056607	0.12902	34
allind	UROBE1963355_EIv1.0_0002120	0	2	UROBE1963355_EIv1.0_0002120.1	High	protein_coding_gene	CRAL-TRIO domain-containing protein	IPR001251 (CRAL-TRIO lipid binding domain), IPR011074 (CRAL/TRIO, N-terminal domain)	GO:0016020, GO:0016021	84	1833	0	1	0	0.474086	NA	UROBE1963355_EIv1.0_0002120	0.04353	0.04572	36
allind	UROBE1963355_EIv1.0_0002130	0	4	UROBE1963355_EIv1.0_0002130.1	High	protein_coding_gene	J domain-containing protein	IPR001623 (DnaJ domain)	None	84	1080	0	1	0	0.493519	NA	UROBE1963355_EIv1.0_0002130	0.17866	0.25882	17
allind	UROBE1963355_EIv1.0_0002140	0	4	UROBE1963355_EIv1.0_0002140.1	High	protein_coding_gene	Aha1_N domain-containing protein	IPR013538 (Activator of Hsp90 ATPase homologue 1-like), IPR015310 (Activator of Hsp90 ATPase, N-terminal), IPR023393 (START-like domain)	GO:0001671, GO:0016020, GO:0016021, GO:0032781, GO:0051087, GO:0051879	84	1062	2	3	4.4839e-05	0.509405	-1.40128	UROBE1963355_EIv1.0_0002140	0.17106	0.25748	18
allind	UROBE1963355_EIv1.0_0002150	0	4	UROBE1963355_EIv1.0_0002150.1	High	protein_coding_gene	Translation initiation factor eIF-2B subunit alpha	IPR000649 (Initiation factor 2B-related)	None	84	1071	1	2	0.000305075	0.474134	0.75415	UROBE1963355_EIv1.0_0002150	0.1287	0.21488	24
allind	UROBE1963355_EIv1.0_0002160	0	1	UROBE1963355_EIv1.0_0002160.1	Low	transposable_element_gene	Integrase catalytic domain-containing protein	None	GO:0000943, GO:0003676, GO:0015074	84	192	1	2	0.000124008	0.406188	-1.04726	UROBE1963355_EIv1.0_0002160	0.16442	0.29117	21
allind	UROBE1963355_EIv1.0_0002170	0	1	UROBE1963355_EIv1.0_0002170.1	Low	transposable_element_gene	Retrotrans_gag domain-containing protein	None	None	84	273	0	1	0	0.512821	NA	UROBE1963355_EIv1.0_0002170	0.21728	0.42481	24
allind	UROBE1963355_EIv1.0_0002180	0	4	UROBE1963355_EIv1.0_0002180.1	High	protein_coding_gene	DNA repair protein RAD7	IPR006553 (Leucine-rich repeat, cysteine-containing subtype), IPR032675 (Leucine-rich repeat domain, L domain-like)	None	84	1998	0	1	0	0.477978	NA	UROBE1963355_EIv1.0_0002180	0.18391	0.37766	8
allind	UROBE1963355_EIv1.0_0002190	0	1	UROBE1963355_EIv1.0_0002190.1	High	protein_coding_gene	Unknown protein	None	None	84	1494	0	1	0	0.378179	NA	UROBE1963355_EIv1.0_0002190	0.17558	0.40875	3
allind	UROBE1963355_EIv1.0_0002200	0	1	UROBE1963355_EIv1.0_0002200.1	High	protein_coding_gene	Unknown protein	None	None	84	363	0	1	0	0.443526	NA	UROBE1963355_EIv1.0_0002200	0.022332	0.027326	2
allind	UROBE1963355_EIv1.0_0002210	0	1	UROBE1963355_EIv1.0_0002210.1	Low	protein_coding_gene	Unknown protein	None	None	84	462	0	1	0	0.484849	NA	UROBE1963355_EIv1.0_0002210	0.14867	0.31941	15
allind	UROBE1963355_EIv1.0_0002220	0	2	UROBE1963355_EIv1.0_0002220.1	High	transposable_element_gene	DUF4219 domain-containing protein	None	None	84	369	0	1	0	0.436314	NA	UROBE1963355_EIv1.0_0002220	0.12641	0.33778	27
allind	UROBE1963355_EIv1.0_0002230	0	1	UROBE1963355_EIv1.0_0002230.1	High	protein_coding_gene	SAPS-domain-containing protein	IPR007587 (SIT4 phosphatase-associated protein family)	None	84	3282	4	5	2.90183e-05	0.536868	-1.80181	UROBE1963355_EIv1.0_0002230	0.055803	0.15349	12
allind	UROBE1963355_EIv1.0_0002240	0	2	UROBE1963355_EIv1.0_0002240.1	High	protein_coding_gene	Phosphoacetylglucosamine mutase	IPR016657 (Phosphoacetylglucosamine mutase)	GO:0000287, GO:0004610, GO:0005975, GO:0006048, GO:0016853, GO:0016868, GO:0046872, GO:0071704	84	1647	0	1	0	0.513054	NA	UROBE1963355_EIv1.0_0002240	0.051112	0.20706	9
allind	UROBE1963355_EIv1.0_0002250	0	2	UROBE1963355_EIv1.0_0002250.1	High	protein_coding_gene	pH-response regulator protein palA/rim20	IPR032675 (Leucine-rich repeat domain, L domain-like)	None	84	1290	0	1	0	0.509302	NA	UROBE1963355_EIv1.0_0002250	0.018876	0.069637	7
allind	UROBE1963355_EIv1.0_0002260	0	3	UROBE1963355_EIv1.0_0002260.1	High	protein_coding_gene	WD_REPEATS_REGION domain-containing protein	IPR015943 (WD40/YVTN repeat-like-containing domain), IPR020472 (G-protein beta WD-40 repeat)	None	84	984	0	1	0	0.512195	NA	UROBE1963355_EIv1.0_0002260	0.039973	0.10761	11
allind	UROBE1963355_EIv1.0_0002270	0	1	UROBE1963355_EIv1.0_0002270.1	High	transposable_element_gene	Integrase catalytic domain-containing protein	None	None	84	156	0	1	0	0.480769	NA	UROBE1963355_EIv1.0_0002270	0.031145	0.10784	11
allind	UROBE1963355_EIv1.0_0002280	0	1	UROBE1963355_EIv1.0_0002280.1	Low	transposable_element_gene	Unknown protein	None	None	84	363	2	2	0.00278801	0.421488	2.43567	UROBE1963355_EIv1.0_0002280	0.047314	0.11982	48
allind	UROBE1963355_EIv1.0_0002290	0	1	UROBE1963355_EIv1.0_0002290.1	Low	transposable_element_gene	Reverse transcriptase Ty1/copia-type domain-containing protein	None	None	84	234	0	1	0	0.41453	NA	UROBE1963355_EIv1.0_0002290	0.1311	0.24361	12
allind	UROBE1963355_EIv1.0_0002300	0	2	UROBE1963355_EIv1.0_0002300.1	High	protein_coding_gene	Unknown protein	None	None	84	561	2	3	0.00096541	0.54121	0.563988	UROBE1963355_EIv1.0_0002300	0.14262	0.25128	21
allind	UROBE1963355_EIv1.0_0002310	1	3	UROBE1963355_EIv1.0_0002310.1	High	protein_coding_gene	Mitochondrial carrier	IPR018108 (Mitochondrial substrate/solute carrier), IPR023395 (Mitochondrial carrier domain)	GO:0016020, GO:0016021, GO:0022857, GO:0055085	84	984	0	1	0	0.518293	NA	UROBE1963355_EIv1.0_0002310	0.084786	0.12556	14
allind	UROBE1963355_EIv1.0_0002320	0	1	UROBE1963355_EIv1.0_0002320.1	Low	transposable_element_gene	Unknown protein	None	None	84	156	0	1	0	0.474359	NA	UROBE1963355_EIv1.0_0002320	0.10856	0.16266	10
allind	UROBE1963355_EIv1.0_0002330	0	1	UROBE1963355_EIv1.0_0002330.1	Low	transposable_element_gene	Unknown protein	None	None	84	207	0	1	0	0.376812	NA	UROBE1963355_EIv1.0_0002330	0.083182	0.14417	12
allind	UROBE1963355_EIv1.0_0002340	0	1	UROBE1963355_EIv1.0_0002340.1	High	protein_coding_gene	ThrE domain-containing protein	IPR010619 (Putative threonine/serine exporter)	GO:0016020, GO:0016021	84	3846	1	2	6.19072e-06	0.545505	-1.04726	UROBE1963355_EIv1.0_0002340	0.04292	0.044974	50
allind	UROBE1963355_EIv1.0_0002350	0	1	UROBE1963355_EIv1.0_0002350.1	Low	predicted_gene	Unknown protein	None	None	84	225	0	1	0	0.533333	NA	UROBE1963355_EIv1.0_0002350	0.0148	0.020331	16
allind	UROBE1963355_EIv1.0_0002360	0	1	UROBE1963355_EIv1.0_0002360.1	High	transposable_element_gene	CDC37_N domain-containing protein	None	None	84	987	1	2	0.000396433	0.472886	1.13797	UROBE1963355_EIv1.0_0002360	0.10193	0.23771	17
allind	UROBE1963355_EIv1.0_0002370	0	2	UROBE1963355_EIv1.0_0002370.1	High	protein_coding_gene	Unknown protein	None	None	84	1935	1	2	1.23047e-05	0.519386	-1.04726	UROBE1963355_EIv1.0_0002370	0.13315	0.19716	18
allind	UROBE1963355_EIv1.0_0002380	0	1	UROBE1963355_EIv1.0_0002380.1	Low	protein_coding_gene	Unknown protein	None	None	84	378	0	1	0	0.566138	NA	UROBE1963355_EIv1.0_0002380	0.13034	0.20584	16
allind	UROBE1963355_EIv1.0_0002390	0	1	UROBE1963355_EIv1.0_0002390.1	Low	predicted_gene	Unknown protein	None	None	84	261	0	1	0	0.586207	NA	UROBE1963355_EIv1.0_0002390	0.12527	0.20641	15
allind	UROBE1963355_EIv1.0_0002400	0	3	UROBE1963355_EIv1.0_0002400.1	Low	protein_coding_gene	Unknown protein	None	None	84	378	0	1	0	0.441799	NA	UROBE1963355_EIv1.0_0002400	0.032129	0.075801	28
allind	UROBE1963355_EIv1.0_0002410	0	2	UROBE1963355_EIv1.0_0002410.1	High	protein_coding_gene	HEME_HALOPEROXIDASE domain-containing protein	IPR000028 (Chloroperoxidase)	GO:0004601, GO:0016020, GO:0016021, GO:0098869	84	1266	0	1	0	0.473934	NA	UROBE1963355_EIv1.0_0002410	0.010341	0.041618	25
allind	UROBE1963355_EIv1.0_0002420	0	4	UROBE1963355_EIv1.0_0002420.1	High	protein_coding_gene	Ribosomal protein L14	IPR000218 (Ribosomal protein L14P)	GO:0003735, GO:0005840, GO:0006412, GO:0015934	84	423	0	1	0	0.49409	NA	UROBE1963355_EIv1.0_0002420	0.023269	0.067917	31
allind	UROBE1963355_EIv1.0_0002430	0	2	UROBE1963355_EIv1.0_0002430.1	High	protein_coding_gene	DNA-directed RNA polymerase subunit	IPR001222 (Zinc finger, TFIIS-type), IPR001529 (DNA-directed RNA polymerase, M/15kDa subunit), IPR012164 (DNA-directed RNA polymerase subunit/transcription factor S)	GO:0003676, GO:0003899, GO:0005634, GO:0005730, GO:0006351, GO:0006379, GO:0008270, GO:0046872	84	387	0	1	0	0.50646	NA	UROBE1963355_EIv1.0_0002430	0.078717	0.13656	17
allind	UROBE1963355_EIv1.0_0002440	0	1	UROBE1963355_EIv1.0_0002440.1	High	protein_coding_gene	NOT2_3_5 domain-containing protein	IPR007282 (NOT2/NOT3/NOT5)	GO:0005634, GO:0006355, GO:0030015	84	1836	1	2	0.000206709	0.494553	1.06803	UROBE1963355_EIv1.0_0002440	0.058357	0.11445	24
allind	UROBE1963355_EIv1.0_0002450	0	1	UROBE1963355_EIv1.0_0002450.1	High	transposable_element_gene	Integrase catalytic domain-containing protein	None	GO:0000943, GO:0003676, GO:0015074	84	399	28	23	0.0341538	0.438537	4.42343	UROBE1963355_EIv1.0_0002450	0.0094141	0.0071069	251
allind	UROBE1963355_EIv1.0_0002460	0	2	UROBE1963355_EIv1.0_0002460.1	High	protein_coding_gene	Oligosaccharide translocation protein RFT1	IPR007594 (RFT1)	GO:0005319, GO:0005789, GO:0006869, GO:0016020, GO:0016021, GO:0034203	84	1788	0	1	0	0.513982	NA	UROBE1963355_EIv1.0_0002460	-0.0030024	-0.015076	9
allind	UROBE1963355_EIv1.0_0002470	0	2	UROBE1963355_EIv1.0_0002470.1	High	protein_coding_gene	RRM Nup35-type domain-containing protein	IPR000504 (RNA recognition motif domain), IPR007846 (RNA-recognition motif (RRM) Nup35-type domain)	None	84	1116	0	1	0	0.527778	NA	UROBE1963355_EIv1.0_0002470	0.081112	0.2205	11
allind	UROBE1963355_EIv1.0_0002480	0	1	UROBE1963355_EIv1.0_0002480.1	Low	transposable_element_gene	Unknown protein	None	None	84	315	0	1	0	0.384127	NA	UROBE1963355_EIv1.0_0002480	0.090813	0.22328	10
allind	UROBE1963355_EIv1.0_0002490	0	1	UROBE1963355_EIv1.0_0002490.1	High	transposable_element_gene	DUF4219 domain-containing protein	None	None	84	324	0	1	0	0.481482	NA	UROBE1963355_EIv1.0_0002490	0.060304	0.10804	10
allind	UROBE1963355_EIv1.0_0002500	0	1	UROBE1963355_EIv1.0_0002500.1	High	protein_coding_gene	Secreted protein	None	GO:0016020, GO:0016021	84	1413	1	2	4.93329e-05	0.522975	-0.774319	UROBE1963355_EIv1.0_0002500	0.11149	0.12415	11
allind	UROBE1963355_EIv1.0_0002510	0	4	UROBE1963355_EIv1.0_0002510.1	High	transposable_element_gene	Integrase catalytic domain-containing protein	None	GO:0000943, GO:0003676, GO:0008270, GO:0015074	84	852	0	1	0	0.456573	NA	UROBE1963355_EIv1.0_0002510	0.10097	0.11052	15
allind	UROBE1963355_EIv1.0_0002520	0	1	UROBE1963355_EIv1.0_0002520.1	High	transposable_element_gene	Integrase catalytic domain-containing protein	None	GO:0003676, GO:0008270, GO:0015074	84	408	0	1	0	0.446078	NA	UROBE1963355_EIv1.0_0002520	0.0059703	0.0038051	86
allind	UROBE1963355_EIv1.0_0002530	0	1	UROBE1963355_EIv1.0_0002530.1	Low	transposable_element_gene	Unknown protein	None	None	84	252	1	2	9.44822e-05	0.500047	-1.04726	UROBE1963355_EIv1.0_0002530	0.005298	0.0028466	102
allind	UROBE1963355_EIv1.0_0002540	0	1	UROBE1963355_EIv1.0_0002540.1	High	transposable_element_gene	Integrase catalytic domain-containing protein	IPR012337 (Ribonuclease H-like domain)	None	84	1119	44	36	0.0182966	0.421539	4.26139	UROBE1963355_EIv1.0_0002540	0.0068976	0.0049487	102
allind	UROBE1963355_EIv1.0_0002550	0	1	UROBE1963355_EIv1.0_0002550.1	Low	transposable_element_gene	Unknown protein	None	None	84	333	0	1	0	0.435435	NA	UROBE1963355_EIv1.0_0002550	0.1688	0.26415	17
allind	UROBE1963355_EIv1.0_0002560	0	1	UROBE1963355_EIv1.0_0002560.1	High	protein_coding_gene	Secreted protein	None	GO:0016020, GO:0016021	84	1725	4	5	0.000219013	0.443596	-1.07907	UROBE1963355_EIv1.0_0002560	0.10771	0.15561	26
allind	UROBE1963355_EIv1.0_0002570	0	2	UROBE1963355_EIv1.0_0002570.1	High	protein_coding_gene	Secreted protein	None	GO:0016020, GO:0016021	84	1209	2	3	3.93871e-05	0.463173	-1.40128	UROBE1963355_EIv1.0_0002570	0.11265	0.20154	15
allind	UROBE1963355_EIv1.0_0002580	0	1	UROBE1963355_EIv1.0_0002580.1	Low	predicted_gene	Unknown protein	None	None	84	236	0	1	0	0.5	NA	UROBE1963355_EIv1.0_0002580	0.13404	0.22984	11
allind	UROBE1963355_EIv1.0_0002590	0	1	UROBE1963355_EIv1.0_0002590.1	High	protein_coding_gene	BZ3500_MvSof-1268-A1-R1_Chr1-1g01072 protein	IPR009598 (Bladder cancer-related BC10)	None	84	1059	2	3	0.000193679	0.431438	-0.77472	UROBE1963355_EIv1.0_0002590	0.09691	0.20174	14
allind	UROBE1963355_EIv1.0_0002600	0	1	UROBE1963355_EIv1.0_0002600.1	High	transposable_element_gene	Unknown protein	None	None	84	303	0	1	0	0.429043	NA	UROBE1963355_EIv1.0_0002600	0.085747	0.19848	14
allind	UROBE1963355_EIv1.0_0002610	0	3	UROBE1963355_EIv1.0_0002610.1	High	protein_coding_gene	Unknown protein	None	None	84	1098	0	1	0	0.505464	NA	UROBE1963355_EIv1.0_0002610	0.14042	0.38918	12
allind	UROBE1963355_EIv1.0_0002620	0	1	UROBE1963355_EIv1.0_0002620.1	Low	predicted_gene	Unknown protein	None	None	84	530	0	1	0	0.469811	NA	UROBE1963355_EIv1.0_0002620	0.076072	0.18215	10
allind	UROBE1963355_EIv1.0_0002630	0	2	UROBE1963355_EIv1.0_0002630.1	High	protein_coding_gene	Histone chaperone asf1	IPR006818 (Histone chaperone ASF1-like)	None	84	675	0	1	0	0.558519	NA	UROBE1963355_EIv1.0_0002630	0.066876	0.1734	11
allind	UROBE1963355_EIv1.0_0002640	0	1	UROBE1963355_EIv1.0_0002640.1	High	transposable_element_gene	Reverse transcriptase domain-containing protein	None	None	84	398	0	1	0	0.530151	NA	UROBE1963355_EIv1.0_0002640	0.0050043	0.014601	28
allind	UROBE1963355_EIv1.0_0002650	0	1	UROBE1963355_EIv1.0_0002650.1	High	transposable_element_gene	Retrotrans_gag domain-containing protein	IPR005162 (Retrotransposon gag domain), IPR032567 (LDOC1-related)	None	84	825	1	2	5.70246e-05	0.52482	-0.909084	UROBE1963355_EIv1.0_0002650	-0.0088671	-0.011509	29
allind	UROBE1963355_EIv1.0_0002660	0	5	UROBE1963355_EIv1.0_0002660.1	High	protein_coding_gene	Unknown protein	None	None	84	1386	1	2	1.71786e-05	0.436499	-1.04726	UROBE1963355_EIv1.0_0002660	0.13132	0.28193	23
allind	UROBE1963355_EIv1.0_0002670	0	1	UROBE1963355_EIv1.0_0002670.1	Low	transposable_element_gene	Unknown protein	None	None	84	198	0	1	0	0.373737	NA	UROBE1963355_EIv1.0_0002670	0.14157	0.41633	8
allind	UROBE1963355_EIv1.0_0002680	0	1	UROBE1963355_EIv1.0_0002680.1	Low	protein_coding_gene	Unknown protein	None	None	84	246	0	1	0	0.451219	NA	UROBE1963355_EIv1.0_0002680	0.16553	0.41482	7
allind	UROBE1963355_EIv1.0_0002690	0	1	UROBE1963355_EIv1.0_0002690.1	High	protein_coding_gene	pH-response regulator protein palA/rim20	IPR032675 (Leucine-rich repeat domain, L domain-like)	None	84	771	0	1	0	0.452659	NA	UROBE1963355_EIv1.0_0002690	0.048107	0.10899	24
allind	UROBE1963355_EIv1.0_0002700	0	4	UROBE1963355_EIv1.0_0002700.1	High	protein_coding_gene	Methyltransf_11 domain-containing protein	IPR029063 (S-adenosyl-L-methionine-dependent methyltransferase)	GO:0008168, GO:0032259	84	867	1	2	2.7462e-05	0.522478	-1.04726	UROBE1963355_EIv1.0_0002700	0.057018	0.11285	30
allind	UROBE1963355_EIv1.0_0002710	0	1	UROBE1963355_EIv1.0_0002710.1	Low	protein_coding_gene	Unknown protein	None	None	84	285	0	1	0	0.452632	NA	UROBE1963355_EIv1.0_0002710	0.129	0.32034	21
allind	UROBE1963355_EIv1.0_0002720	0	1	UROBE1963355_EIv1.0_0002720.1	Low	predicted_gene	Unknown protein	None	None	84	153	1	2	0.00194054	0.482493	0.576738	UROBE1963355_EIv1.0_0002720	0.12213	0.42298	9
allind	UROBE1963355_EIv1.0_0002730	0	2	UROBE1963355_EIv1.0_0002730.1	High	protein_coding_gene	CAAX prenyl protease	IPR001915 (Peptidase M48), IPR027057 (CAAX prenyl protease 1), IPR032456 (CAAX prenyl protease 1, N-terminal)	None	84	1548	0	1	0	0.518088	NA	UROBE1963355_EIv1.0_0002730	0.13571	0.38739	11
allind	UROBE1963355_EIv1.0_0002740	0	1	UROBE1963355_EIv1.0_0002740.1	High	transposable_element_gene	Integrase catalytic domain-containing protein	None	GO:0000943, GO:0003676, GO:0015074	84	1329	2	3	7.07981e-05	0.481529	-1.21639	UROBE1963355_EIv1.0_0002740	0.093106	0.19979	16
allind	UROBE1963355_EIv1.0_0002750	0	2	UROBE1963355_EIv1.0_0002750.1	High	protein_coding_gene	S5A_REDUCTASE domain-containing protein	IPR010721 (Protein of unknown function DUF1295)	None	84	1059	7	12	0.00242627	0.48488	2.01538	UROBE1963355_EIv1.0_0002750	0.031158	0.014398	12
allind	UROBE1963355_EIv1.0_0002760	0	4	UROBE1963355_EIv1.0_0002760.1	High	protein_coding_gene	Peptidyl-prolyl cis-trans isomerase	IPR002130 (Cyclophilin-type peptidyl-prolyl cis-trans isomerase domain), IPR024936 (Cyclophilin-type peptidyl-prolyl cis-trans isomerase), IPR029000 (Cyclophilin-like domain)	GO:0000413, GO:0003755, GO:0006457, GO:0016853	84	495	0	1	0	0.492929	NA	UROBE1963355_EIv1.0_0002760	0.031158	0.014398	12
allind	UROBE1963355_EIv1.0_0002770	0	1	UROBE1963355_EIv1.0_0002770.1	High	protein_coding_gene	Mitochondrial ribosomal protein subunit-domain-containing protein	IPR016712 (Mitochondrial ribosomal protein MRP51, fungi)	None	84	1404	0	1	0	0.514245	NA	UROBE1963355_EIv1.0_0002770	0.027561	0.014149	13
allind	UROBE1963355_EIv1.0_0002780	0	3	UROBE1963355_EIv1.0_0002780.1	High	protein_coding_gene	LETM1-like protein-domain-containing protein	IPR011685 (LETM1-like), IPR011992 (EF-hand domain pair), IPR033122 (Letm1 ribosome-binding domain)	GO:0005739, GO:0016020, GO:0016021, GO:0043022	84	2115	2	3	4.4216e-05	0.472796	-1.21867	UROBE1963355_EIv1.0_0002780	0.1005	0.14613	21
allind	UROBE1963355_EIv1.0_0002790	0	1	UROBE1963355_EIv1.0_0002790.1	High	protein_coding_gene	UPF0658 Golgi apparatus membrane protein	None	None	84	1398	2	3	6.73038e-05	0.485711	-1.21639	UROBE1963355_EIv1.0_0002790	0.052657	0.13499	15
allind	UROBE1963355_EIv1.0_0002800	0	1	UROBE1963355_EIv1.0_0002800.1	Low	protein_coding_gene	Unknown protein	None	None	84	300	0	1	0	0.516667	NA	UROBE1963355_EIv1.0_0002800	0.03881	0.060638	12
allind	UROBE1963355_EIv1.0_0002810	0	2	UROBE1963355_EIv1.0_0002810.1	High	protein_coding_gene	Auxin efflux carrier	IPR004776 (Membrane transport protein)	None	84	1428	0	1	0	0.501401	NA	UROBE1963355_EIv1.0_0002810	0.0774	0.075381	25
allind	UROBE1963355_EIv1.0_0002820	0	1	UROBE1963355_EIv1.0_0002820.1	High	transposable_element_gene	Integrase catalytic domain-containing protein	None	GO:0000943, GO:0003676, GO:0015074	84	321	1	2	0.000972291	0.43673	0.66715	UROBE1963355_EIv1.0_0002820	0.055732	0.052471	48
allind	UROBE1963355_EIv1.0_0002830	0	3	UROBE1963355_EIv1.0_0002830.1	High	protein_coding_gene	Glycyl-tRNA synthetase	IPR027031 (Glycyl-tRNA synthetase/DNA polymerase subunit gamma-2)	GO:0000166, GO:0004812, GO:0004820, GO:0005524, GO:0005737, GO:0005739, GO:0006418, GO:0006426	84	1902	0	1	0	0.462671	NA	UROBE1963355_EIv1.0_0002830	0.091276	0.2243	13
allind	UROBE1963355_EIv1.0_0002840	0	1	UROBE1963355_EIv1.0_0002840.1	Low	predicted_gene	Unknown protein	None	None	84	207	1	2	0.000227272	0.608696	-0.909084	UROBE1963355_EIv1.0_0002840	0.20286	0.40487	7
allind	UROBE1963355_EIv1.0_0002850	0	2	UROBE1963355_EIv1.0_0002850.1	High	protein_coding_gene	Deoxyuridine 5'-triphosphate nucleotidohydrolase	IPR008180 (Deoxyuridine triphosphate nucleotidohydrolase/Deoxycytidine triphosphate deaminase), IPR029054 (dUTPase-like)	GO:0004170, GO:0016787, GO:0046080	84	456	0	1	0	0.532895	NA	UROBE1963355_EIv1.0_0002850	0.18596	0.39157	8
allind	UROBE1963355_EIv1.0_0002860	0	1	UROBE1963355_EIv1.0_0002860.1	High	protein_coding_gene	Initiator tRNA phosphoribosyl transferase	IPR033449 (Rit1, N-terminal domain)	GO:0016740, GO:0019988, GO:0043399	84	324	0	1	0	0.45679	NA	UROBE1963355_EIv1.0_0002860	0.22952	0.39618	10
allind	UROBE1963355_EIv1.0_0002870	0	1	UROBE1963355_EIv1.0_0002870.1	High	protein_coding_gene	REJ domain-containing protein	None	None	84	1959	1	2	2.4015e-05	0.505858	-0.909084	UROBE1963355_EIv1.0_0002870	0.19657	0.32203	12
allind	UROBE1963355_EIv1.0_0002880	0	2	UROBE1963355_EIv1.0_0002880.1	High	protein_coding_gene	MBOAT_2 domain-containing protein	IPR032805 (Wax synthase domain)	None	84	1359	1	2	8.33778e-05	0.514305	-0.515026	UROBE1963355_EIv1.0_0002880	0.15319	0.22938	6
allind	UROBE1963355_EIv1.0_0002890	0	3	UROBE1963355_EIv1.0_0002890.1	High	protein_coding_gene	Smr domain-containing protein	IPR002625 (Smr domain)	None	84	1500	2	3	4.72366e-05	0.489992	-1.30883	UROBE1963355_EIv1.0_0002890	0.079737	0.19405	11
allind	UROBE1963355_EIv1.0_0002900	0	1	UROBE1963355_EIv1.0_0002900.1	High	transposable_element_gene	Integrase catalytic domain-containing protein	None	GO:0003676, GO:0015074	84	681	1	2	0.00010236	0.437644	-0.774319	UROBE1963355_EIv1.0_0002900	0.11937	0.61588	17
allind	UROBE1963355_EIv1.0_0002910	0	2	UROBE1963355_EIv1.0_0002910.1	High	protein_coding_gene	PfkB domain-containing protein	IPR029056 (Ribokinase-like)	None	84	1005	2	3	4.73821e-05	0.526392	-1.40128	UROBE1963355_EIv1.0_0002910	0.1829	0.47104	22
allind	UROBE1963355_EIv1.0_0002920	0	3	UROBE1963355_EIv1.0_0002920.1	High	transposable_element_gene	Integrase catalytic domain-containing protein	None	None	84	225	0	1	0	0.48	NA	UROBE1963355_EIv1.0_0002920	0.10426	0.3532	19
allind	UROBE1963355_EIv1.0_0002930	0	3	UROBE1963355_EIv1.0_0002930.1	High	protein_coding_gene	Sfi1 domain-containing protein	IPR013665 (Sfi1 spindle body)	None	84	2895	0	1	0	0.470121	NA	UROBE1963355_EIv1.0_0002930	0.15058	0.37646	28
allind	UROBE1963355_EIv1.0_0002940	0	2	UROBE1963355_EIv1.0_0002940.1	High	protein_coding_gene	SE domain-containing protein	IPR013698 (Squalene epoxidase), IPR023753 (FAD/NAD(P)-binding domain)	GO:0004506, GO:0016020, GO:0016021, GO:0016126, GO:0050660, GO:0055114	84	1572	0	1	0	0.487913	NA	UROBE1963355_EIv1.0_0002940	0.054497	0.12907	25
allind	UROBE1963355_EIv1.0_0002950	0	1	UROBE1963355_EIv1.0_0002950.1	Low	transposable_element_gene	Unknown protein	None	None	84	360	5	8	0.00401447	0.571561	0.977994	UROBE1963355_EIv1.0_0002950	0.29309	0.42681	17
allind	UROBE1963355_EIv1.0_0002960	0	1	UROBE1963355_EIv1.0_0002960.1	High	transposable_element_gene	Unknown protein	None	None	84	300	1	2	7.93651e-05	0.48004	-1.04726	UROBE1963355_EIv1.0_0002960	0.053588	0.10395	99
allind	UROBE1963355_EIv1.0_0002970	0	2	UROBE1963355_EIv1.0_0002970.1	High	protein_coding_gene	HSF_DOMAIN domain-containing protein	IPR011991 (Winged helix-turn-helix DNA-binding domain), IPR027725 (Heat shock transcription factor family)	GO:0003677, GO:0003700, GO:0005634, GO:0006355, GO:0043565	84	2232	1	2	0.000220416	0.474201	1.73674	UROBE1963355_EIv1.0_0002970	0.063194	0.1055	93
allind	UROBE1963355_EIv1.0_0002980	0	1	UROBE1963355_EIv1.0_0002980.1	Low	protein_coding_gene	S-adenosylmethionine decarboxylase proenzyme	None	GO:0004014, GO:0006557, GO:0006596, GO:0006597, GO:0008295, GO:0016829, GO:0016831	84	372	0	1	0	0.462366	NA	UROBE1963355_EIv1.0_0002980	0.30502	0.55719	22
allind	UROBE1963355_EIv1.0_0002990	0	1	UROBE1963355_EIv1.0_0002990.1	Low	transposable_element_gene	Unknown protein	None	None	84	306	0	1	0	0.441177	NA	UROBE1963355_EIv1.0_0002990	0.31863	0.56386	21
allind	UROBE1963355_EIv1.0_0003000	0	2	UROBE1963355_EIv1.0_0003000.1	High	protein_coding_gene	E3 ubiquitin-protein ligase	IPR003126 (Zinc finger, UBR-type), IPR011991 (Winged helix-turn-helix DNA-binding domain), IPR014719 (Ribosomal protein L7/L12, C-terminal/adaptor protein ClpS-like)	GO:0008270, GO:0016567, GO:0030163, GO:0061630, GO:0071596	84	6252	2	3	0.000144761	0.503151	2.00997	UROBE1963355_EIv1.0_0003000	0.16074	0.38455	20
allind	UROBE1963355_EIv1.0_0003010	0	1	UROBE1963355_EIv1.0_0003010.1	High	transposable_element_gene	Integrase catalytic domain-containing protein	None	None	84	879	1	2	0.000104432	0.489138	-0.642967	UROBE1963355_EIv1.0_0003010	0.074771	0.1256	51
allind	UROBE1963355_EIv1.0_0003020	0	1	UROBE1963355_EIv1.0_0003020.1	Low	protein_coding_gene	Unknown protein	None	None	84	528	2	3	0.0015446	0.511386	1.6539	UROBE1963355_EIv1.0_0003020	0.31826	0.53641	25
allind	UROBE1963355_EIv1.0_0003030	0	1	UROBE1963355_EIv1.0_0003030.1	Low	predicted_gene	Unknown protein	None	None	84	240	0	1	0	0.516667	NA	UROBE1963355_EIv1.0_0003030	0.33258	0.55495	20
allind	UROBE1963355_EIv1.0_0003040	0	2	UROBE1963355_EIv1.0_0003040.1	High	protein_coding_gene	BZIP domain-containing protein	None	GO:0003700, GO:0006355	84	1437	1	2	0.000280074	0.513379	1.2045	UROBE1963355_EIv1.0_0003040	0.39508	0.54137	38
allind	UROBE1963355_EIv1.0_0003050	0	1	UROBE1963355_EIv1.0_0003050.1	Low	transposable_element_gene	Unknown protein	None	None	84	306	1	2	0.00106776	0.40589	0.75415	UROBE1963355_EIv1.0_0003050	0.31114	0.56243	25
allind	UROBE1963355_EIv1.0_0003060	0	3	UROBE1963355_EIv1.0_0003060.1	High	protein_coding_gene	F-box domain-containing protein	IPR001810 (F-box domain), IPR015943 (WD40/YVTN repeat-like-containing domain)	None	84	1791	2	3	0.00023801	0.468865	0.105198	UROBE1963355_EIv1.0_0003060	0.29493	0.46557	29
allind	UROBE1963355_EIv1.0_0003070	0	1	UROBE1963355_EIv1.0_0003070.1	High	protein_coding_gene	Integrase catalytic domain-containing protein	None	GO:0000943, GO:0003676, GO:0015074	84	900	0	1	0	0.488889	NA	UROBE1963355_EIv1.0_0003070	0.24964	0.4326	19
allind	UROBE1963355_EIv1.0_0003080	0	1	UROBE1963355_EIv1.0_0003080.1	High	transposable_element_gene	Integrase catalytic domain-containing protein	None	None	84	1017	0	1	0	0.526057	NA	UROBE1963355_EIv1.0_0003080	0.014008	0.01585	47
allind	UROBE1963355_EIv1.0_0003090	0	3	UROBE1963355_EIv1.0_0003090.1	High	transposable_element_gene	Integrase catalytic domain-containing protein	None	GO:0000943, GO:0003676, GO:0015074	84	450	0	1	0	0.457778	NA	UROBE1963355_EIv1.0_0003090	0.025825	0.059234	11
allind	UROBE1963355_EIv1.0_0003100	0	1	UROBE1963355_EIv1.0_0003100.1	High	transposable_element_gene	Integrase catalytic domain-containing protein	None	GO:0000943, GO:0003676, GO:0015074	84	1203	0	1	0	0.433915	NA	UROBE1963355_EIv1.0_0003100	0.025447	0.055043	21
allind	UROBE1963355_EIv1.0_0003110	0	2	UROBE1963355_EIv1.0_0003110.1	High	transposable_element_gene	Integrase catalytic domain-containing protein	None	None	84	1065	0	1	0	0.493897	NA	UROBE1963355_EIv1.0_0003110	0.10612	0.20866	27
allind	UROBE1963355_EIv1.0_0003120	0	5	UROBE1963355_EIv1.0_0003120.1	High	protein_coding_gene	UDP-N-acetylglucosamine transferase subunit ALG14	IPR013969 (Oligosaccharide biosynthesis protein Alg14-like)	GO:0005783, GO:0005789, GO:0006488, GO:0016020, GO:0016021	84	765	0	1	0	0.471895	NA	UROBE1963355_EIv1.0_0003120	0.042184	0.026777	26
allind	UROBE1963355_EIv1.0_0003130	0	1	UROBE1963355_EIv1.0_0003130.1	Low	predicted_gene	Unknown protein	None	None	84	237	0	1	0	0.552743	NA	UROBE1963355_EIv1.0_0003130	0.023414	0.0095764	24
allind	UROBE1963355_EIv1.0_0003140	0	1	UROBE1963355_EIv1.0_0003140.1	High	transposable_element_gene	CCHC-type domain-containing protein	None	None	84	294	0	1	0	0.496599	NA	UROBE1963355_EIv1.0_0003140	0.060708	0.069507	24
allind	UROBE1963355_EIv1.0_0003150	0	1	UROBE1963355_EIv1.0_0003150.1	High	transposable_element_gene	CCHC-type domain-containing protein	None	GO:0003676, GO:0008270	84	498	10	15	0.00393254	0.453409	-0.053494	UROBE1963355_EIv1.0_0003150	0.059418	0.06843	35
allind	UROBE1963355_EIv1.0_0003160	0	1	UROBE1963355_EIv1.0_0003160.1	High	protein_coding_gene	Unplaced genomic scaffold scaffold_321, whole genome shotgun sequence	None	None	84	1722	1	2	0.000181246	0.474918	0.66715	UROBE1963355_EIv1.0_0003160	0.081537	0.15222	17
allind	UROBE1963355_EIv1.0_0003170	0	2	UROBE1963355_EIv1.0_0003170.1	High	protein_coding_gene	Golgi transport complex subunit 5-domain-containing protein	IPR019465 (Conserved oligomeric Golgi complex subunit 5)	GO:0006891, GO:0017119	84	1863	1	2	1.27802e-05	0.495431	-1.04726	UROBE1963355_EIv1.0_0003170	0.00999	0.015051	14
allind	UROBE1963355_EIv1.0_0003180	0	4	UROBE1963355_EIv1.0_0003180.1	High	protein_coding_gene	GLE1-like protein-domain containing protein	IPR012476 (GLE1-like)	None	84	1977	2	3	4.73024e-05	0.527591	-1.21867	UROBE1963355_EIv1.0_0003180	0.021193	0.052556	22
allind	UROBE1963355_EIv1.0_0003190	0	1	UROBE1963355_EIv1.0_0003190.1	High	transposable_element_gene	Leucine-zipper-like transcriptional regulator 1	None	None	84	684	1	2	0.000165658	0.432661	-0.515026	UROBE1963355_EIv1.0_0003190	0.083712	0.15846	17
allind	UROBE1963355_EIv1.0_0003200	0	3	UROBE1963355_EIv1.0_0003200.1	High	protein_coding_gene	Thiosulfate sulfurtransferase, putative	IPR001763 (Rhodanese-like domain)	GO:0016740	84	1086	0	1	0	0.515654	NA	UROBE1963355_EIv1.0_0003200	0.07512	0.13715	18
allind	UROBE1963355_EIv1.0_0003210	0	1	UROBE1963355_EIv1.0_0003210.1	High	transposable_element_gene	Endo/exonuclease/phosphatase domain-containing protein	None	None	84	390	0	1	0	0.507692	NA	UROBE1963355_EIv1.0_0003210	0.15194	0.18508	7
allind	UROBE1963355_EIv1.0_0003220	0	2	UROBE1963355_EIv1.0_0003220.1	High	protein_coding_gene	HORMA domain-containing protein	None	GO:0007094	84	1047	0	1	0	0.486151	NA	UROBE1963355_EIv1.0_0003220	0.12938	0.17756	10
allind	UROBE1963355_EIv1.0_0003230	0	1	UROBE1963355_EIv1.0_0003230.1	Low	predicted_gene	Unknown protein	None	None	84	222	0	1	0	0.558559	NA	UROBE1963355_EIv1.0_0003230	0.11657	0.19058	8
allind	UROBE1963355_EIv1.0_0003240	0	1	UROBE1963355_EIv1.0_0003240.1	High	transposable_element_gene	OTU domain-containing protein	None	None	84	213	0	1	0	0.450704	NA	UROBE1963355_EIv1.0_0003240	0.076574	0.13604	23
allind	UROBE1963355_EIv1.0_0003250	0	1	UROBE1963355_EIv1.0_0003250.1	High	protein_coding_gene	Unknown protein	None	None	84	1707	4	5	0.000331731	0.564566	-0.597006	UROBE1963355_EIv1.0_0003250	0.04756	0.10882	23
allind	UROBE1963355_EIv1.0_0003260	0	2	UROBE1963355_EIv1.0_0003260.1	High	protein_coding_gene	S-adenosyl-L-methionine-dependent methyltransferase	IPR022238 (Uncharacterised protein family, methyltransferase, Williams-Beuren syndrome), IPR029063 (S-adenosyl-L-methionine-dependent methyltransferase)	GO:0008168, GO:0016435, GO:0016740, GO:0032259, GO:0070476	84	894	0	1	0	0.450783	NA	UROBE1963355_EIv1.0_0003260	0.048242	0.030911	20
allind	UROBE1963355_EIv1.0_0003270	0	3	UROBE1963355_EIv1.0_0003270.1	High	protein_coding_gene	Prohibitin	IPR000163 (Prohibitin)	GO:0016020	84	231	0	1	0	0.484849	NA	UROBE1963355_EIv1.0_0003270	0.06156	0.076822	12
allind	UROBE1963355_EIv1.0_0003280	0	1	UROBE1963355_EIv1.0_0003280.1	High	protein_coding_gene	Histidine protein methyltransferase 1	IPR029063 (S-adenosyl-L-methionine-dependent methyltransferase)	GO:0008168, GO:0016740, GO:0032259	84	1359	0	1	0	0.407653	NA	UROBE1963355_EIv1.0_0003280	0.068053	0.076841	15
allind	UROBE1963355_EIv1.0_0003290	0	1	UROBE1963355_EIv1.0_0003290.1	High	transposable_element_gene	Integrase catalytic domain-containing protein	IPR013103 (Reverse transcriptase, RNA-dependent DNA polymerase)	GO:0000943, GO:0003676, GO:0015074	84	948	0	1	0	0.508439	NA	UROBE1963355_EIv1.0_0003290	0.0517	0.068091	31
allind	UROBE1963355_EIv1.0_0003300	0	1	UROBE1963355_EIv1.0_0003300.1	High	transposable_element_gene	Integrase catalytic domain-containing protein	None	None	84	405	0	1	0	0.51358	NA	UROBE1963355_EIv1.0_0003300	0.05586	0.068093	27
allind	UROBE1963355_EIv1.0_0003310	0	4	UROBE1963355_EIv1.0_0003310.1	High	protein_coding_gene	Arrestin_C domain-containing protein	None	None	84	5535	3	3	2.11972e-05	0.54273	-1.49091	UROBE1963355_EIv1.0_0003310	0.046644	0.039095	21
allind	UROBE1963355_EIv1.0_0003320	0	2	UROBE1963355_EIv1.0_0003320.1	Low	protein_coding_gene	Unknown protein	None	None	84	393	0	1	0	0.498728	NA	UROBE1963355_EIv1.0_0003320	0.027014	0.021114	16
allind	UROBE1963355_EIv1.0_0003330	0	1	UROBE1963355_EIv1.0_0003330.1	High	transposable_element_gene	NAM-associated domain-containing protein	None	None	84	297	0	1	0	0.46128	NA	UROBE1963355_EIv1.0_0003330	0.030329	0.029195	18
allind	UROBE1963355_EIv1.0_0003340	0	1	UROBE1963355_EIv1.0_0003340.1	High	transposable_element_gene	Integrase catalytic domain-containing protein	None	GO:0000943, GO:0003676, GO:0015074	84	914	2	3	0.000102316	0.437585	-1.21867	UROBE1963355_EIv1.0_0003340	0.074504	0.34939	10
allind	UROBE1963355_EIv1.0_0003350	0	1	UROBE1963355_EIv1.0_0003350.1	Low	transposable_element_gene	Unknown protein	None	None	84	255	0	1	0	0.45098	NA	UROBE1963355_EIv1.0_0003350	0.074504	0.34939	10
allind	UROBE1963355_EIv1.0_0003360	0	3	UROBE1963355_EIv1.0_0003360.1	High	protein_coding_gene	Unplaced genomic scaffold supercont1.1, whole genome shotgun sequence	IPR031833 (Protein of unknown function DUF4748)	GO:0016020, GO:0016021	84	342	0	1	0	0.482456	NA	UROBE1963355_EIv1.0_0003360	0.041883	0.14707	5
allind	UROBE1963355_EIv1.0_0003370	0	1	UROBE1963355_EIv1.0_0003370.1	High	protein_coding_gene	Unknown protein	None	None	84	2073	1	2	0.000150557	0.577516	0.66715	UROBE1963355_EIv1.0_0003370	0.14257	0.4907	8
allind	UROBE1963355_EIv1.0_0003380	0	1	UROBE1963355_EIv1.0_0003380.1	High	protein_coding_gene	PEK/GCN2 protein kinase	IPR004154 (Anticodon-binding), IPR011009 (Protein kinase-like domain), IPR024435 (Histidyl tRNA synthetase-related domain)	GO:0000077, GO:0000166, GO:0004672, GO:0004694, GO:0005524, GO:0006468, GO:0010998, GO:0016301, GO:0016310	84	4443	2	3	1.07178e-05	0.449251	-1.40128	UROBE1963355_EIv1.0_0003380	0.082415	0.38521	8
allind	UROBE1963355_EIv1.0_0003390	0	1	UROBE1963355_EIv1.0_0003390.1	High	transposable_element_gene	Unknown protein	None	None	84	405	0	1	0	0.520988	NA	UROBE1963355_EIv1.0_0003390	0.12039	0.53813	14
allind	UROBE1963355_EIv1.0_0003400	0	1	UROBE1963355_EIv1.0_0003400.1	Low	transposable_element_gene	Unknown protein	None	None	84	246	0	1	0	0.430894	NA	UROBE1963355_EIv1.0_0003400	0.1041	0.46791	15
allind	UROBE1963355_EIv1.0_0003410	0	1	UROBE1963355_EIv1.0_0003410.1	High	transposable_element_gene	Integrase catalytic domain-containing protein	None	None	84	660	1	2	0.000139084	0.489322	-0.642967	UROBE1963355_EIv1.0_0003410	0.14593	0.54259	10
allind	UROBE1963355_EIv1.0_0003420	0	1	UROBE1963355_EIv1.0_0003420.1	High	transposable_element_gene	Reverse transcriptase domain-containing protein	IPR000477 (Reverse transcriptase domain), IPR026523 (Paraneoplastic antigen Ma)	None	84	324	0	1	0	0.481482	NA	UROBE1963355_EIv1.0_0003420	0.19399	0.49736	11
allind	UROBE1963355_EIv1.0_0003430	0	1	UROBE1963355_EIv1.0_0003430.1	High	transposable_element_gene	Integrase catalytic domain-containing protein	None	GO:0000943, GO:0003676, GO:0015074	84	729	0	1	0	0.491084	NA	UROBE1963355_EIv1.0_0003430	0.19478	0.51942	10
allind	UROBE1963355_EIv1.0_0003440	0	1	UROBE1963355_EIv1.0_0003440.1	High	transposable_element_gene	Integrase catalytic domain-containing protein	IPR013103 (Reverse transcriptase, RNA-dependent DNA polymerase)	GO:0000943, GO:0003676, GO:0015074	84	414	1	2	0.00118833	0.482085	1.73674	UROBE1963355_EIv1.0_0003440	0.2894	0.54543	6
allind	UROBE1963355_EIv1.0_0003450	0	1	UROBE1963355_EIv1.0_0003450.1	Low	predicted_gene	Unknown protein	None	None	84	285	2	3	0.000554599	0.455931	-0.961888	UROBE1963355_EIv1.0_0003450	0.12486	0.23359	21
allind	UROBE1963355_EIv1.0_0003460	0	3	UROBE1963355_EIv1.0_0003460.1	High	protein_coding_gene	Polar growth protein	None	None	84	1704	1	2	0.000286188	0.480047	1.71115	UROBE1963355_EIv1.0_0003460	0.11656	0.22842	26
allind	UROBE1963355_EIv1.0_0003470	0	2	UROBE1963355_EIv1.0_0003470.1	High	protein_coding_gene	60S ribosomal protein L6	IPR000915 (60S ribosomal protein L6E), IPR005568 (Ribosomal protein L6, N-terminal), IPR008991 (Translation protein SH3-like domain)	GO:0003735, GO:0005840, GO:0006412	84	753	0	1	0	0.52988	NA	UROBE1963355_EIv1.0_0003470	0.025189	0.028731	10
allind	UROBE1963355_EIv1.0_0003480	0	1	UROBE1963355_EIv1.0_0003480.1	Low	predicted_gene	Unknown protein	None	None	84	228	0	1	0	0.491228	NA	UROBE1963355_EIv1.0_0003480	0.020302	0.010585	8
allind	UROBE1963355_EIv1.0_0003490	0	1	UROBE1963355_EIv1.0_0003490.1	High	transposable_element_gene	Integrase catalytic domain-containing protein	None	GO:0000943, GO:0003676, GO:0015074	84	579	2	3	0.00126734	0.449009	1.32864	UROBE1963355_EIv1.0_0003490	0.039622	0.073439	22
allind	UROBE1963355_EIv1.0_0003500	0	1	UROBE1963355_EIv1.0_0003500.1	Low	transposable_element_gene	Unknown protein	None	None	84	285	0	1	0	0.438597	NA	UROBE1963355_EIv1.0_0003500	0.041057	0.067748	20
allind	UROBE1963355_EIv1.0_0003510	0	2	UROBE1963355_EIv1.0_0003510.1	High	protein_coding_gene	Unknown protein	None	None	84	1473	6	7	0.000143918	0.539707	-1.90397	UROBE1963355_EIv1.0_0003510	0.034664	0.072553	30
allind	UROBE1963355_EIv1.0_0003520	0	1	UROBE1963355_EIv1.0_0003520.1	Low	predicted_gene	Unknown protein	None	None	84	198	0	1	0	0.550505	NA	UROBE1963355_EIv1.0_0003520	0.035039	0.076675	20
allind	UROBE1963355_EIv1.0_0003530	0	1	UROBE1963355_EIv1.0_0003530.1	High	transposable_element_gene	Integrase catalytic domain-containing protein	None	None	84	936	0	1	0	0.50641	NA	UROBE1963355_EIv1.0_0003530	0.079938	0.085126	19
allind	UROBE1963355_EIv1.0_0003540	0	4	UROBE1963355_EIv1.0_0003540.1	High	protein_coding_gene	T-complex protein 1 subunit zeta	IPR002423 (Chaperonin Cpn60/TCP-1 family), IPR027409 (GroEL-like apical domain), IPR027410 (TCP-1-like chaperonin intermediate domain), IPR027413 (GroEL-like equatorial domain)	GO:0000166, GO:0005524, GO:0005737, GO:0006457, GO:0051082	84	1665	2	3	0.00028445	0.461268	0.293507	UROBE1963355_EIv1.0_0003540	0.071632	0.11598	27
allind	UROBE1963355_EIv1.0_0003550	0	1	UROBE1963355_EIv1.0_0003550.1	High	transposable_element_gene	Integrase catalytic domain-containing protein	None	GO:0000943, GO:0003676, GO:0015074	84	268	0	1	0	0.414179	NA	UROBE1963355_EIv1.0_0003550	0.044267	0.057145	34
allind	UROBE1963355_EIv1.0_0003560	0	1	UROBE1963355_EIv1.0_0003560.1	High	transposable_element_gene	Unplaced genomic scaffold PAXINscaffold_75, whole genome shotgun sequence	None	None	84	348	0	1	0	0.456896	NA	UROBE1963355_EIv1.0_0003560	0.027717	0.047408	55
allind	UROBE1963355_EIv1.0_0003570	0	1	UROBE1963355_EIv1.0_0003570.1	High	transposable_element_gene	Integrase catalytic domain-containing protein	None	None	84	552	0	1	0	0.527174	NA	UROBE1963355_EIv1.0_0003570	0.027281	0.046091	58
allind	UROBE1963355_EIv1.0_0003580	0	4	UROBE1963355_EIv1.0_0003580.1	High	protein_coding_gene	Vesicular-fusion ATPase SEC18	IPR003959 (ATPase, AAA-type, core), IPR009010 (Aspartate decarboxylase-like domain), IPR027417 (P-loop containing nucleoside triphosphate hydrolase), IPR029067 (CDC48 domain 2-like)	GO:0005524, GO:0016887, GO:0035494	84	2295	0	1	0	0.462309	NA	UROBE1963355_EIv1.0_0003580	0.072422	0.15224	22
allind	UROBE1963355_EIv1.0_0003590	0	1	UROBE1963355_EIv1.0_0003590.1	High	protein_coding_gene	Cytochrome c heme lyase	IPR000511 (Cytochrome c/c1 haem-lyase)	GO:0004408, GO:0005739, GO:0005743, GO:0016020, GO:0016829, GO:0046872	84	864	0	1	0	0.489583	NA	UROBE1963355_EIv1.0_0003590	0.053373	0.1258	19
allind	UROBE1963355_EIv1.0_0003600	0	1	UROBE1963355_EIv1.0_0003600.1	High	transposable_element_gene	Retrotrans_gag domain-containing protein	IPR005162 (Retrotransposon gag domain), IPR032567 (LDOC1-related)	None	84	522	0	1	0	0.519157	NA	UROBE1963355_EIv1.0_0003600	0.039732	0.10921	20
allind	UROBE1963355_EIv1.0_0003610	0	1	UROBE1963355_EIv1.0_0003610.1	High	transposable_element_gene	Integrase catalytic domain-containing protein	None	None	84	294	0	1	0	0.44898	NA	UROBE1963355_EIv1.0_0003610	0.054426	0.1607	18
allind	UROBE1963355_EIv1.0_0003620	0	1	UROBE1963355_EIv1.0_0003620.1	High	transposable_element_gene	Integrase catalytic domain-containing protein	None	None	84	387	0	1	0	0.410853	NA	UROBE1963355_EIv1.0_0003620	0.068342	0.16976	16
allind	UROBE1963355_EIv1.0_0003630	0	1	UROBE1963355_EIv1.0_0003630.1	High	transposable_element_gene	Integrase catalytic domain-containing protein	None	GO:0000943, GO:0003676, GO:0015074	84	840	0	1	0	0.535714	NA	UROBE1963355_EIv1.0_0003630	0.26953	0.47616	9
allind	UROBE1963355_EIv1.0_0003640	0	2	UROBE1963355_EIv1.0_0003640.1	High	transposable_element_gene	Integrase catalytic domain-containing protein	IPR013103 (Reverse transcriptase, RNA-dependent DNA polymerase)	GO:0000943, GO:0003676, GO:0015074	84	1449	2	3	0.000518489	0.515996	1.39826	UROBE1963355_EIv1.0_0003640	0.21529	0.4338	14
allind	UROBE1963355_EIv1.0_0003650	0	2	UROBE1963355_EIv1.0_0003650.1	High	protein_coding_gene	Sin3 associated polypeptide p18 (SAP18)-domain containing protein	IPR010516 (Sin3 associated polypeptide p18)	None	84	822	0	1	0	0.541362	NA	UROBE1963355_EIv1.0_0003650	0.09383	0.27173	8
allind	UROBE1963355_EIv1.0_0003660	0	1	UROBE1963355_EIv1.0_0003660.1	High	protein_coding_gene	Palmitoyltransferase	IPR001594 (Palmitoyltransferase, DHHC domain)	None	84	1326	0	1	0	0.511312	NA	UROBE1963355_EIv1.0_0003660	0.051245	0.13915	14
allind	UROBE1963355_EIv1.0_0003670	0	2	UROBE1963355_EIv1.0_0003670.1	High	protein_coding_gene	DUF962-domain-containing protein	IPR009305 (Protein of unknown function DUF962)	GO:0016020, GO:0016021	84	717	0	1	0	0.53417	NA	UROBE1963355_EIv1.0_0003670	0.036887	0.039811	39
allind	UROBE1963355_EIv1.0_0003680	0	1	UROBE1963355_EIv1.0_0003680.1	Low	transposable_element_gene	Unknown protein	None	None	84	162	1	2	0.00107662	0.383304	-0.151673	UROBE1963355_EIv1.0_0003680	0.021434	0.009257	37
allind	UROBE1963355_EIv1.0_0003690	0	1	UROBE1963355_EIv1.0_0003690.1	Low	transposable_element_gene	Unknown protein	None	None	84	486	1	2	0.000143431	0.368239	-0.774319	UROBE1963355_EIv1.0_0003690	0.13873	0.18229	30
allind	UROBE1963355_EIv1.0_0003700	0	1	UROBE1963355_EIv1.0_0003700.1	High	protein_coding_gene	DUF1713 domain-containing protein	IPR013177 (Domain of unknown function DUF1713)	None	84	1671	0	1	0	0.495512	NA	UROBE1963355_EIv1.0_0003700	0.089317	0.2364	14
allind	UROBE1963355_EIv1.0_0003710	0	3	UROBE1963355_EIv1.0_0003710.1	High	protein_coding_gene	Polyketide_cyc domain-containing protein	IPR023393 (START-like domain)	None	84	627	0	1	0	0.424242	NA	UROBE1963355_EIv1.0_0003710	0.086259	0.16207	6
allind	UROBE1963355_EIv1.0_0003720	0	2	UROBE1963355_EIv1.0_0003720.1	High	protein_coding_gene	Unknown protein	None	None	84	1608	0	1	0	0.485075	NA	UROBE1963355_EIv1.0_0003720	0.085667	0.34468	8
allind	UROBE1963355_EIv1.0_0003730	0	2	UROBE1963355_EIv1.0_0003730.1	High	protein_coding_gene	26S protease regulatory subunit 6A	IPR003959 (ATPase, AAA-type, core), IPR005937 (26S proteasome subunit P45), IPR027417 (P-loop containing nucleoside triphosphate hydrolase)	GO:0000166, GO:0005524, GO:0005737, GO:0006508, GO:0006511, GO:0008233, GO:0008540, GO:0016787, GO:0030163, GO:0036402, GO:0045899, GO:0070682, GO:1901800	84	1386	0	1	0	0.473305	NA	UROBE1963355_EIv1.0_0003730	0.038536	0.066902	21
allind	UROBE1963355_EIv1.0_0003740	0	1	UROBE1963355_EIv1.0_0003740.1	High	protein_coding_gene	OPT oligopeptide transporter	IPR004813 (Oligopeptide transporter, OPT superfamily)	GO:0016020, GO:0016021, GO:0055085	84	2133	1	2	3.26805e-05	0.481498	-0.774319	UROBE1963355_EIv1.0_0003740	0.048902	0.11678	17
allind	UROBE1963355_EIv1.0_0003750	0	1	UROBE1963355_EIv1.0_0003750.1	Low	transposable_element_gene	Reverse transcriptase domain-containing protein	None	None	84	228	0	1	0	0.548246	NA	UROBE1963355_EIv1.0_0003750	0.056889	0.1003	18
allind	UROBE1963355_EIv1.0_0003760	0	1	UROBE1963355_EIv1.0_0003760.1	High	transposable_element_gene	Integrase_H2C2 domain-containing protein	None	None	84	264	1	2	9.01876e-05	0.556773	-1.04726	UROBE1963355_EIv1.0_0003760	0.038094	0.076092	17
allind	UROBE1963355_EIv1.0_0003770	0	1	UROBE1963355_EIv1.0_0003770.1	High	transposable_element_gene	Integrase catalytic domain-containing protein	IPR012337 (Ribonuclease H-like domain), IPR015416 (Zinc finger, H2C2-type, histone UAS binding)	GO:0003676, GO:0015074	84	1521	3	4	0.000545245	0.516679	0.709462	UROBE1963355_EIv1.0_0003770	0.024637	0.066679	17
allind	UROBE1963355_EIv1.0_0003780	0	1	UROBE1963355_EIv1.0_0003780.1	High	transposable_element_gene	Integrase catalytic domain-containing protein	None	GO:0000943, GO:0003676, GO:0015074	84	600	1	2	0.000835724	0.486667	1.79303	UROBE1963355_EIv1.0_0003780	0.064708	0.055324	15
allind	UROBE1963355_EIv1.0_0003790	0	1	UROBE1963355_EIv1.0_0003790.1	High	transposable_element_gene	Integrase catalytic domain-containing protein	None	GO:0000943, GO:0003676, GO:0015074	84	1359	2	4	0.000622273	0.542854	1.77373	UROBE1963355_EIv1.0_0003790	0.039601	0.046454	21
allind	UROBE1963355_EIv1.0_0003800	0	3	UROBE1963355_EIv1.0_0003800.1	High	protein_coding_gene	J domain-containing protein	IPR001623 (DnaJ domain)	None	84	1023	0	1	0	0.469208	NA	UROBE1963355_EIv1.0_0003800	0.098764	0.11036	13
allind	UROBE1963355_EIv1.0_0003810	0	2	UROBE1963355_EIv1.0_0003810.1	High	protein_coding_gene	Mitochondrial intermediate peptidase	None	None	84	462	0	1	0	0.474026	NA	UROBE1963355_EIv1.0_0003810	0.077234	0.07823	13
allind	UROBE1963355_EIv1.0_0003820	0	3	UROBE1963355_EIv1.0_0003820.1	High	protein_coding_gene	UPF0132 domain-containing protein	None	GO:0016020, GO:0016021	84	654	2	3	0.000108341	0.527559	-1.30883	UROBE1963355_EIv1.0_0003820	0.021579	0.026481	50
allind	UROBE1963355_EIv1.0_0003830	1	2	UROBE1963355_EIv1.0_0003830.1	High	protein_coding_gene	Rust transferred protein	None	None	84	651	1	2	0.000564029	0.492722	0.994679	UROBE1963355_EIv1.0_0003830	0.15419	0.39584	14
allind	UROBE1963355_EIv1.0_0003840	0	1	UROBE1963355_EIv1.0_0003840.1	High	protein_coding_gene	Flavodoxin-like domain-containing protein	IPR010089 (Flavoprotein WrbA), IPR029039 (Flavoprotein-like domain)	GO:0003955, GO:0010181, GO:0016491, GO:0055114	84	618	1	2	0.000112795	0.504912	-0.774319	UROBE1963355_EIv1.0_0003840	0.11995	0.40032	21
allind	UROBE1963355_EIv1.0_0003850	0	4	UROBE1963355_EIv1.0_0003850.1	High	protein_coding_gene	Unknown protein	None	None	84	1032	0	1	0	0.570736	NA	UROBE1963355_EIv1.0_0003850	0.24605	0.48132	9
allind	UROBE1963355_EIv1.0_0003860	0	1	UROBE1963355_EIv1.0_0003860.1	Low	predicted_gene	Unknown protein	None	None	84	225	0	1	0	0.448889	NA	UROBE1963355_EIv1.0_0003860	0.35999	0.62224	17
allind	UROBE1963355_EIv1.0_0003870	0	2	UROBE1963355_EIv1.0_0003870.1	High	protein_coding_gene	Chitin synthase	IPR004835 (Chitin synthase), IPR013616 (Chitin synthase N-terminal), IPR029044 (Nucleotide-diphospho-sugar transferases)	GO:0004100, GO:0006031, GO:0016020, GO:0016021, GO:0016758, GO:0030428	84	2700	0	1	0	0.475185	NA	UROBE1963355_EIv1.0_0003870	0.29387	0.61514	14
allind	UROBE1963355_EIv1.0_0003880	0	1	UROBE1963355_EIv1.0_0003880.1	High	transposable_element_gene	Reverse transcriptase domain-containing protein	None	None	84	951	1	2	9.65255e-05	0.535176	-0.642967	UROBE1963355_EIv1.0_0003880	0.43286	0.6554	16
allind	UROBE1963355_EIv1.0_0003890	0	2	UROBE1963355_EIv1.0_0003890.1	High	protein_coding_gene	Ubiquitin-like domain-containing protein	IPR000626 (Ubiquitin domain), IPR019413 (Domain of unknown function DUF2407 N-terminal), IPR025390 (Domain of unknown function DUF2407 C-terminal)	GO:0016020, GO:0016021	84	1116	1	2	8.22543e-05	0.514294	-0.642967	UROBE1963355_EIv1.0_0003890	0.31472	0.61117	25
allind	UROBE1963355_EIv1.0_0003900	0	1	UROBE1963355_EIv1.0_0003900.1	High	transposable_element_gene	Integrase catalytic domain-containing protein	None	None	84	717	0	1	0	0.474198	NA	UROBE1963355_EIv1.0_0003900	0.097418	0.19757	24
allind	UROBE1963355_EIv1.0_0003910	0	2	UROBE1963355_EIv1.0_0003910.1	High	protein_coding_gene	HIT-type domain-containing protein	IPR007529 (Zinc finger, HIT-type)	GO:0046872	84	1164	2	3	0.000461098	0.481724	0.544586	UROBE1963355_EIv1.0_0003910	0.3226	0.64364	11
allind	UROBE1963355_EIv1.0_0003920	0	1	UROBE1963355_EIv1.0_0003920.1	Low	transposable_element_gene	Unknown protein	None	None	84	174	0	1	0	0.436782	NA	UROBE1963355_EIv1.0_0003920	0.35367	0.73588	8
allind	UROBE1963355_EIv1.0_0003930	0	1	UROBE1963355_EIv1.0_0003930.1	High	transposable_element_gene	Integrase catalytic domain-containing protein	None	GO:0000943, GO:0003676, GO:0015074	84	1038	0	1	0	0.49711	NA	UROBE1963355_EIv1.0_0003930	0.043847	0.036813	33
allind	UROBE1963355_EIv1.0_0003940	0	6	UROBE1963355_EIv1.0_0003940.1	High	protein_coding_gene	Unknown protein	IPR001199 (Cytochrome b5-like heme/steroid binding domain)	None	84	1053	1	2	0.000235374	0.568987	0.285033	UROBE1963355_EIv1.0_0003940	0.017159	0.025453	22
allind	UROBE1963355_EIv1.0_0003950	0	2	UROBE1963355_EIv1.0_0003950.1	High	protein_coding_gene	Unknown protein	None	None	84	1035	0	1	0	0.532367	NA	UROBE1963355_EIv1.0_0003950	0.13551	0.33196	14
allind	UROBE1963355_EIv1.0_0003960	0	7	UROBE1963355_EIv1.0_0003960.1	High	protein_coding_gene	Serine/threonine-protein phosphatase	IPR029052 (Metallo-dependent phosphatase-like)	GO:0004721, GO:0006470, GO:0016787	84	933	1	2	5.04237e-05	0.4877	-0.909084	UROBE1963355_EIv1.0_0003960	0.13254	0.33961	12
allind	UROBE1963355_EIv1.0_0003970	0	3	UROBE1963355_EIv1.0_0003970.1	High	protein_coding_gene	Phosphoglycerate mutase-like protein	IPR029033 (Histidine phosphatase superfamily)	GO:0016311, GO:0016791	84	1785	0	1	0	0.482353	NA	UROBE1963355_EIv1.0_0003970	0.11375	0.35175	17
allind	UROBE1963355_EIv1.0_0003980	0	2	UROBE1963355_EIv1.0_0003980.1	High	protein_coding_gene	Ribosomal protein L13	IPR005822 (Ribosomal protein L13)	GO:0003735, GO:0005840, GO:0006412	84	498	0	1	0	0.48996	NA	UROBE1963355_EIv1.0_0003980	0.24395	0.44988	17
allind	UROBE1963355_EIv1.0_0003990	0	3	UROBE1963355_EIv1.0_0003990.1	High	protein_coding_gene	Ribosomal_L30 domain-containing protein	IPR005996 (Ribosomal protein L30, bacterial-type), IPR016082 (Ribosomal protein L30, ferredoxin-like fold domain)	GO:0003735, GO:0006412, GO:0015934	84	429	0	1	0	0.592075	NA	UROBE1963355_EIv1.0_0003990	0.25145	0.44636	18
allind	UROBE1963355_EIv1.0_0004000	0	1	UROBE1963355_EIv1.0_0004000.1	Low	transposable_element_gene	Integrase catalytic domain-containing protein	None	GO:0000943, GO:0003676, GO:0015074	84	510	1	2	4.66853e-05	0.521592	-1.04726	UROBE1963355_EIv1.0_0004000	0.23809	0.42849	28
allind	UROBE1963355_EIv1.0_0004010	0	2	UROBE1963355_EIv1.0_0004010.1	High	transposable_element_gene	Integrase catalytic domain-containing protein	None	GO:0000943, GO:0003676, GO:0015074	84	342	1	2	6.96185e-05	0.505813	-1.04726	UROBE1963355_EIv1.0_0004010	0.10499	0.28239	39
allind	UROBE1963355_EIv1.0_0004020	0	1	UROBE1963355_EIv1.0_0004020.1	High	protein_coding_gene	DNA mismatch repair protein	IPR011184 (DNA mismatch repair MutS), IPR027417 (P-loop containing nucleoside triphosphate hydrolase)	GO:0000166, GO:0003677, GO:0005524, GO:0006281, GO:0006298, GO:0006974, GO:0030983, GO:0032300	84	2925	1	2	1.60839e-05	0.459153	-0.909084	UROBE1963355_EIv1.0_0004020	0.14553	0.26767	27
allind	UROBE1963355_EIv1.0_0004030	0	2	UROBE1963355_EIv1.0_0004030.1	High	protein_coding_gene	Cytochrome c	IPR002327 (Cytochrome c, class IA/ IB), IPR009056 (Cytochrome c-like domain)	GO:0005739, GO:0005758, GO:0006122, GO:0006123, GO:0009055, GO:0020037, GO:0042775, GO:0046872, GO:0055114, GO:0070469	84	339	0	1	0	0.498525	NA	UROBE1963355_EIv1.0_0004030	0.13242	0.18876	26
allind	UROBE1963355_EIv1.0_0004040	0	1	UROBE1963355_EIv1.0_0004040.1	High	transposable_element_gene	Integrase catalytic domain-containing protein	IPR012337 (Ribonuclease H-like domain), IPR013103 (Reverse transcriptase, RNA-dependent DNA polymerase)	GO:0000943, GO:0003676, GO:0015074	84	1380	1	2	0.000226163	0.459282	0.66715	UROBE1963355_EIv1.0_0004040	0.1556	0.35165	20
allind	UROBE1963355_EIv1.0_0004050	0	1	UROBE1963355_EIv1.0_0004050.1	High	transposable_element_gene	Integrase catalytic domain-containing protein	None	GO:0000943, GO:0003676, GO:0015074	84	729	0	1	0	0.422497	NA	UROBE1963355_EIv1.0_0004050	0.17555	0.33177	22
allind	UROBE1963355_EIv1.0_0004060	0	1	UROBE1963355_EIv1.0_0004060.1	Low	transposable_element_gene	Unknown protein	None	None	84	207	0	1	0	0.449275	NA	UROBE1963355_EIv1.0_0004060	0.33612	0.6016	15
allind	UROBE1963355_EIv1.0_0004070	0	4	UROBE1963355_EIv1.0_0004070.1	High	protein_coding_gene	Unplaced genomic scaffold PAXINscaffold_35, whole genome shotgun sequence	IPR025337 (Domain of unknown function DUF4243)	GO:0016491, GO:0055114	84	1440	0	1	0	0.435417	NA	UROBE1963355_EIv1.0_0004070	0.14804	0.28686	15
allind	UROBE1963355_EIv1.0_0004080	0	1	UROBE1963355_EIv1.0_0004080.1	Low	predicted_gene	Unknown protein	None	None	84	417	0	1	0	0.541966	NA	UROBE1963355_EIv1.0_0004080	0.22045	0.44322	7
allind	UROBE1963355_EIv1.0_0004090	0	2	UROBE1963355_EIv1.0_0004090.1	High	protein_coding_gene	NodB homology domain-containing protein	IPR011330 (Glycoside hydrolase/deacetylase, beta/alpha-barrel)	None	84	1179	0	1	0	0.536048	NA	UROBE1963355_EIv1.0_0004090	0.22235	0.4473	11
allind	UROBE1963355_EIv1.0_0004100	0	1	UROBE1963355_EIv1.0_0004100.1	High	protein_coding_gene	GRIP domain-containing protein	IPR000237 (GRIP domain)	None	84	1383	0	1	0	0.492408	NA	UROBE1963355_EIv1.0_0004100	0.21768	0.3515	6
allind	UROBE1963355_EIv1.0_0004110	1	1	UROBE1963355_EIv1.0_0004110.1	Low	protein_coding_gene	Unknown protein	None	None	84	972	0	1	0	0.486625	NA	UROBE1963355_EIv1.0_0004110	0.094039	0.16202	9
allind	UROBE1963355_EIv1.0_0004120	0	1	UROBE1963355_EIv1.0_0004120.1	Low	transposable_element_gene	Unknown protein	None	None	84	324	1	2	0.00152993	0.477072	1.75891	UROBE1963355_EIv1.0_0004120	0.16755	0.23682	17
allind	UROBE1963355_EIv1.0_0004130	0	4	UROBE1963355_EIv1.0_0004130.1	High	protein_coding_gene	RSC complex subunit (RSC1)	IPR001025 (Bromo adjacent homology (BAH) domain), IPR001487 (Bromodomain)	GO:0003682, GO:0006338, GO:0016586	84	2433	1	2	1.93363e-05	0.472266	-0.909084	UROBE1963355_EIv1.0_0004130	0.040334	0.07591	77
allind	UROBE1963355_EIv1.0_0004140	0	1	UROBE1963355_EIv1.0_0004140.1	High	transposable_element_gene	Integrase catalytic domain-containing protein	None	GO:0000943, GO:0003676, GO:0015074	84	342	0	1	0	0.508772	NA	UROBE1963355_EIv1.0_0004140	0.15223	0.25945	17
allind	UROBE1963355_EIv1.0_0004150	0	1	UROBE1963355_EIv1.0_0004150.1	High	transposable_element_gene	Integrase catalytic domain-containing protein	IPR013103 (Reverse transcriptase, RNA-dependent DNA polymerase)	GO:0000943, GO:0003676, GO:0015074	84	1296	1	2	0.000216917	0.524563	0.482915	UROBE1963355_EIv1.0_0004150	0.1447	0.24001	23
allind	UROBE1963355_EIv1.0_0004160	0	1	UROBE1963355_EIv1.0_0004160.1	Low	transposable_element_gene	Unknown protein	None	None	84	204	0	1	0	0.470588	NA	UROBE1963355_EIv1.0_0004160	0.14286	0.25746	22
allind	UROBE1963355_EIv1.0_0004170	0	1	UROBE1963355_EIv1.0_0004170.1	High	protein_coding_gene	Unknown protein	None	None	84	1866	2	3	0.000312842	0.500785	0.731754	UROBE1963355_EIv1.0_0004170	0.014434	0.016346	125
allind	UROBE1963355_EIv1.0_0004180	0	1	UROBE1963355_EIv1.0_0004180.1	Low	transposable_element_gene	Unknown protein	None	None	84	267	0	1	0	0.382022	NA	UROBE1963355_EIv1.0_0004180	0.016208	0.019736	93
allind	UROBE1963355_EIv1.0_0004190	0	2	UROBE1963355_EIv1.0_0004190.1	High	protein_coding_gene	Mitochondrial import inner membrane translocase subunit tim16	IPR005341 (Mitochondrial import inner membrane translocase subunit Tim16)	GO:0005744, GO:0030150	84	429	0	1	0	0.503497	NA	UROBE1963355_EIv1.0_0004190	0.026728	0.075729	13
allind	UROBE1963355_EIv1.0_0004200	0	2	UROBE1963355_EIv1.0_0004200.1	High	protein_coding_gene	START domain-containing protein	IPR023393 (START-like domain)	GO:0008289	84	3276	2	3	0.000123116	0.476721	0.013897	UROBE1963355_EIv1.0_0004200	0.12651	0.21853	10
allind	UROBE1963355_EIv1.0_0004210	0	2	UROBE1963355_EIv1.0_0004210.1	High	protein_coding_gene	Unknown protein	None	None	84	864	1	2	0.000577376	0.450879	1.77768	UROBE1963355_EIv1.0_0004210	0.064818	0.13206	15
allind	UROBE1963355_EIv1.0_0004220	0	1	UROBE1963355_EIv1.0_0004220.1	High	transposable_element_gene	Integrase catalytic domain-containing protein	None	GO:0000943, GO:0003676, GO:0015074	84	579	1	2	4.11218e-05	0.626964	-1.04726	UROBE1963355_EIv1.0_0004220	0.057922	0.1461	17
allind	UROBE1963355_EIv1.0_0004230	0	1	UROBE1963355_EIv1.0_0004230.1	High	transposable_element_gene	Reverse transcriptase domain-containing protein	None	None	84	651	0	1	0	0.493088	NA	UROBE1963355_EIv1.0_0004230	0.055983	0.10906	8
allind	UROBE1963355_EIv1.0_0004240	0	1	UROBE1963355_EIv1.0_0004240.1	High	transposable_element_gene	Integrase catalytic domain-containing protein	None	GO:0000943, GO:0003676, GO:0015074	84	186	1	2	0.000128008	0.424795	-1.04726	UROBE1963355_EIv1.0_0004240	0.020201	0.041202	8
allind	UROBE1963355_EIv1.0_0004250	0	1	UROBE1963355_EIv1.0_0004250.1	High	transposable_element_gene	Integrase catalytic domain-containing protein	None	GO:0000943, GO:0003676, GO:0015074	84	405	0	1	0	0.434568	NA	UROBE1963355_EIv1.0_0004250	0.068296	0.10188	15
allind	UROBE1963355_EIv1.0_0004260	0	1	UROBE1963355_EIv1.0_0004260.1	Low	transposable_element_gene	Unknown protein	None	None	84	210	0	1	0	0.433333	NA	UROBE1963355_EIv1.0_0004260	0.017856	0.0094656	3
allind	UROBE1963355_EIv1.0_0004270	0	1	UROBE1963355_EIv1.0_0004270.1	High	transposable_element_gene	BZ3500_MvSof-1268-A1- protein	None	GO:0000943, GO:0003676, GO:0015074	84	576	1	2	4.1336e-05	0.484396	-1.04726	UROBE1963355_EIv1.0_0004270	0.017672	0.065221	6
allind	UROBE1963355_EIv1.0_0004280	0	2	UROBE1963355_EIv1.0_0004280.1	High	protein_coding_gene	Polar growth protein	None	None	84	1665	0	1	0	0.520721	NA	UROBE1963355_EIv1.0_0004280	0.075217	0.1954	9
allind	UROBE1963355_EIv1.0_0004290	0	1	UROBE1963355_EIv1.0_0004290.1	Low	predicted_gene	Unknown protein	None	None	84	297	1	2	0.0015647	0.436508	1.57468	UROBE1963355_EIv1.0_0004290	0.075217	0.1954	9
allind	UROBE1963355_EIv1.0_0004300	0	4	UROBE1963355_EIv1.0_0004300.1	High	transposable_element_gene	Integrase catalytic domain-containing protein	None	GO:0000943, GO:0003676, GO:0015074	84	534	1	2	8.80999e-05	0.462502	-0.909084	UROBE1963355_EIv1.0_0004300	0.093977	0.20626	7
allind	UROBE1963355_EIv1.0_0004310	0	3	UROBE1963355_EIv1.0_0004310.1	High	protein_coding_gene	Unknown protein	None	None	84	720	0	1	0	0.491667	NA	UROBE1963355_EIv1.0_0004310	0.073347	0.15946	9
allind	UROBE1963355_EIv1.0_0004320	0	1	UROBE1963355_EIv1.0_0004320.1	High	protein_coding_gene	C2H2-type domain-containing protein	None	None	84	459	0	1	0	0.448802	NA	UROBE1963355_EIv1.0_0004320	0.041761	0.033333	7
allind	UROBE1963355_EIv1.0_0004330	0	1	UROBE1963355_EIv1.0_0004330.1	High	protein_coding_gene	Unplaced genomic scaffold SPHSTscaffold_72, whole genome shotgun sequence	None	None	84	660	0	1	0	0.380303	NA	UROBE1963355_EIv1.0_0004330	0.053121	0.053444	8
allind	UROBE1963355_EIv1.0_0004340	0	2	UROBE1963355_EIv1.0_0004340.1	Low	protein_coding_gene	Retrotran_gag_3 domain-containing protein	None	None	84	198	0	1	0	0.474747	NA	UROBE1963355_EIv1.0_0004340	0.03001	0.037748	12
allind	UROBE1963355_EIv1.0_0004350	0	1	UROBE1963355_EIv1.0_0004350.1	Low	transposable_element_gene	Unknown protein	None	None	84	204	0	1	0	0.352941	NA	UROBE1963355_EIv1.0_0004350	0.084322	0.14367	11
allind	UROBE1963355_EIv1.0_0004360	0	1	UROBE1963355_EIv1.0_0004360.1	High	protein_coding_gene	CCHC-type domain-containing protein	None	GO:0003676, GO:0008270	84	660	0	1	0	0.490909	NA	UROBE1963355_EIv1.0_0004360	0.048023	0.049595	24
allind	UROBE1963355_EIv1.0_0004370	0	5	UROBE1963355_EIv1.0_0004370.1	High	protein_coding_gene	DNA polymerase epsilon subunit	IPR016266 (DNA polymerase epsilon, subunit B), IPR029052 (Metallo-dependent phosphatase-like)	GO:0003677, GO:0003887, GO:0005634, GO:0006260, GO:0006261, GO:0008622, GO:0016740, GO:0016779, GO:0071897	84	1722	0	1	0	0.464576	NA	UROBE1963355_EIv1.0_0004370	0.032351	0.033579	38
allind	UROBE1963355_EIv1.0_0004380	0	2	UROBE1963355_EIv1.0_0004380.1	High	protein_coding_gene	Unknown protein	None	None	84	741	0	1	0	0.476383	NA	UROBE1963355_EIv1.0_0004380	0.010118	0.012415	88
allind	UROBE1963355_EIv1.0_0004390	0	1	UROBE1963355_EIv1.0_0004390.1	High	transposable_element_gene	Integrase catalytic domain-containing protein	None	GO:0000943, GO:0003676, GO:0015074	84	288	0	1	0	0.5	NA	UROBE1963355_EIv1.0_0004390	0.040738	0.10885	15
allind	UROBE1963355_EIv1.0_0004400	0	1	UROBE1963355_EIv1.0_0004400.1	Low	transposable_element_gene	Unknown protein	None	None	84	222	0	1	0	0.427928	NA	UROBE1963355_EIv1.0_0004400	0.096442	0.13388	22
allind	UROBE1963355_EIv1.0_0004410	0	1	UROBE1963355_EIv1.0_0004410.1	High	transposable_element_gene	Integrase catalytic domain-containing protein	None	GO:0000943, GO:0003676, GO:0015074	84	285	0	1	0	0.442105	NA	UROBE1963355_EIv1.0_0004410	0.091044	0.15524	16
allind	UROBE1963355_EIv1.0_0004420	0	3	UROBE1963355_EIv1.0_0004420.1	High	protein_coding_gene	Unknown protein	None	None	84	279	0	1	0	0.530466	NA	UROBE1963355_EIv1.0_0004420	0.17156	0.39881	6
allind	UROBE1963355_EIv1.0_0004430	0	1	UROBE1963355_EIv1.0_0004430.1	High	protein_coding_gene	Salivary gland secretion 1	IPR013830 (SGNH hydrolase-type esterase domain)	None	84	1566	0	1	0	0.516603	NA	UROBE1963355_EIv1.0_0004430	0.088739	0.31887	6
allind	UROBE1963355_EIv1.0_0004440	0	1	UROBE1963355_EIv1.0_0004440.1	High	protein_coding_gene	V-ATPase V1 sector subunit E	IPR002842 (ATPase, V1/A1 complex, subunit E)	None	84	681	0	1	0	0.483113	NA	UROBE1963355_EIv1.0_0004440	0.12914	0.41978	4
allind	UROBE1963355_EIv1.0_0004450	0	1	UROBE1963355_EIv1.0_0004450.1	High	protein_coding_gene	Unplaced genomic scaffold scaffold_37, whole genome shotgun sequence	IPR022226 (Protein of unknown function DUF3752)	None	84	804	0	1	0	0.476846	NA	UROBE1963355_EIv1.0_0004450	0.1522	0.33467	5
allind	UROBE1963355_EIv1.0_0004460	0	1	UROBE1963355_EIv1.0_0004460.1	High	protein_coding_gene	NMT1 domain-containing protein	IPR015168 (SsuA/THI5-like), IPR027939 (NMT1/THI5 family)	GO:0009228	84	1026	0	1	0	0.517544	NA	UROBE1963355_EIv1.0_0004460	0.19271	0.39946	9
allind	UROBE1963355_EIv1.0_0004470	0	2	UROBE1963355_EIv1.0_0004470.1	High	protein_coding_gene	Ribosomal l19 domain-containing protein	IPR001857 (Ribosomal protein L19), IPR008991 (Translation protein SH3-like domain)	GO:0003735, GO:0005840, GO:0006412	84	669	0	1	0	0.506726	NA	UROBE1963355_EIv1.0_0004470	0.17492	0.37326	13
allind	UROBE1963355_EIv1.0_0004480	0	1	UROBE1963355_EIv1.0_0004480.1	High	protein_coding_gene	Unknown protein	None	None	84	714	0	1	0	0.473389	NA	UROBE1963355_EIv1.0_0004480	0.042889	0.024703	29
allind	UROBE1963355_EIv1.0_0004490	0	2	UROBE1963355_EIv1.0_0004490.1	High	protein_coding_gene	Cytochrome b5 heme-binding domain-containing protein	IPR001199 (Cytochrome b5-like heme/steroid binding domain)	GO:0016020, GO:0016021, GO:0020037, GO:0046872	84	393	0	1	0	0.480916	NA	UROBE1963355_EIv1.0_0004490	0.035746	0.033514	30
allind	UROBE1963355_EIv1.0_0004500	0	1	UROBE1963355_EIv1.0_0004500.1	High	transposable_element_gene	CCHC-type domain-containing protein	None	GO:0003676, GO:0008270	84	1197	0	1	0	0.489557	NA	UROBE1963355_EIv1.0_0004500	0.11995	0.19615	20
allind	UROBE1963355_EIv1.0_0004510	0	1	UROBE1963355_EIv1.0_0004510.1	Low	predicted_gene	Unknown protein	None	None	84	246	0	1	0	0.495935	NA	UROBE1963355_EIv1.0_0004510	0.13213	0.23039	13
allind	UROBE1963355_EIv1.0_0004520	0	3	UROBE1963355_EIv1.0_0004520.1	High	protein_coding_gene	STAS domain-containing protein	IPR001902 (SLC26A/SulP transporter)	GO:0008271, GO:0008272, GO:0015116, GO:0016020, GO:0016021, GO:0055085, GO:1902358	84	2052	0	1	0	0.479045	NA	UROBE1963355_EIv1.0_0004520	0.14986	0.24043	22
allind	UROBE1963355_EIv1.0_0004530	0	1	UROBE1963355_EIv1.0_0004530.1	High	transposable_element_gene	Integrase catalytic domain-containing protein	None	None	84	279	1	2	8.53388e-05	0.494581	-1.04726	UROBE1963355_EIv1.0_0004530	0.10262	0.15421	30
allind	UROBE1963355_EIv1.0_0004540	0	2	UROBE1963355_EIv1.0_0004540.1	High	protein_coding_gene	TLC domain-containing protein	None	GO:0016020, GO:0016021	84	3582	3	3	3.89209e-05	0.483821	-1.42265	UROBE1963355_EIv1.0_0004540	0.18064	0.3386	18
allind	UROBE1963355_EIv1.0_0004550	0	1	UROBE1963355_EIv1.0_0004550.1	Low	predicted_gene	Unknown protein	None	None	84	285	1	2	0.00175942	0.475272	1.79303	UROBE1963355_EIv1.0_0004550	0.15503	0.3409	14
allind	UROBE1963355_EIv1.0_0004560	0	1	UROBE1963355_EIv1.0_0004560.1	Low	predicted_gene	Unknown protein	None	None	84	210	0	1	0	0.6	NA	UROBE1963355_EIv1.0_0004560	0.19503	0.3568	10
allind	UROBE1963355_EIv1.0_0004570	0	5	UROBE1963355_EIv1.0_0004570.1	High	protein_coding_gene	P-loop containing nucleoside triphosphate hydrolase protein	IPR001650 (Helicase, C-terminal), IPR007502 (Helicase-associated domain), IPR011709 (Domain of unknown function DUF1605), IPR014001 (Helicase superfamily 1/2, ATP-binding domain), IPR027417 (P-loop containing nucleoside triphosphate hydrolase)	None	84	2187	0	1	0	0.507545	NA	UROBE1963355_EIv1.0_0004570	0.16787	0.32011	13
allind	UROBE1963355_EIv1.0_0004580	0	2	UROBE1963355_EIv1.0_0004580.1	High	transposable_element_gene	Integrase catalytic domain-containing protein	None	None	84	669	0	1	0	0.54858	NA	UROBE1963355_EIv1.0_0004580	0.025328	0.025153	141
allind	UROBE1963355_EIv1.0_0004590	0	1	UROBE1963355_EIv1.0_0004590.1	High	transposable_element_gene	Integrase catalytic domain-containing protein	IPR013103 (Reverse transcriptase, RNA-dependent DNA polymerase)	GO:0000943, GO:0003676, GO:0015074	84	297	0	1	0	0.457912	NA	UROBE1963355_EIv1.0_0004590	0.16555	0.29509	9
allind	UROBE1963355_EIv1.0_0004600	0	1	UROBE1963355_EIv1.0_0004600.1	High	transposable_element_gene	Integrase catalytic domain-containing protein	None	GO:0000943, GO:0003676, GO:0015074	84	1356	0	1	0	0.429204	NA	UROBE1963355_EIv1.0_0004600	0.16272	0.29133	11
allind	UROBE1963355_EIv1.0_0004610	0	5	UROBE1963355_EIv1.0_0004610.1	High	protein_coding_gene	Unplaced genomic scaffold scaffold_270, whole genome shotgun sequence	IPR019357 (Predicted coiled-coil protein (DUF2205))	None	84	282	1	2	8.44309e-05	0.414936	-1.04726	UROBE1963355_EIv1.0_0004610	0.1189	0.32412	21
allind	UROBE1963355_EIv1.0_0004620	0	2	UROBE1963355_EIv1.0_0004620.1	High	protein_coding_gene	Dsl1_C domain-containing protein	IPR009361 (RZZ complex, subunit Zw10), IPR021876 (Retrograde transport protein Dsl1, C-terminal domain)	GO:0000278, GO:0000775, GO:0005634	84	2769	1	2	4.84837e-05	0.442063	-0.390496	UROBE1963355_EIv1.0_0004620	0.022087	0.025194	52
allind	UROBE1963355_EIv1.0_0004630	0	1	UROBE1963355_EIv1.0_0004630.1	Low	predicted_gene	Unknown protein	None	None	84	201	0	1	0	0.457711	NA	UROBE1963355_EIv1.0_0004630	0.060996	0.13275	12
allind	UROBE1963355_EIv1.0_0004640	0	1	UROBE1963355_EIv1.0_0004640.1	High	transposable_element_gene	RNase H domain-containing protein	IPR012337 (Ribonuclease H-like domain)	GO:0003676, GO:0004523, GO:0090502	84	486	1	2	0.000473971	0.479154	0.180974	UROBE1963355_EIv1.0_0004640	0.086548	0.11677	55
allind	UROBE1963355_EIv1.0_0004650	0	1	UROBE1963355_EIv1.0_0004650.1	High	protein_coding_gene	Histone H3	IPR000164 (Histone H3/CENP-A), IPR009072 (Histone-fold)	GO:0000786, GO:0003677, GO:0005634, GO:0005694, GO:0046982	84	492	0	1	0	0.502032	NA	UROBE1963355_EIv1.0_0004650	0.086981	0.1128	52
allind	UROBE1963355_EIv1.0_0004660	0	1	UROBE1963355_EIv1.0_0004660.1	High	transposable_element_gene	Endo/exonuclease/phosphatase domain-containing protein	None	None	84	810	27	34	0.011892	0.542402	2.40982	UROBE1963355_EIv1.0_0004660	0.08568	0.11298	55
allind	UROBE1963355_EIv1.0_0004670	0	5	UROBE1963355_EIv1.0_0004670.1	High	protein_coding_gene	DNA_LIGASE_A3 domain-containing protein	IPR012308 (DNA ligase, ATP-dependent, N-terminal), IPR012310 (DNA ligase, ATP-dependent, central)	GO:0003677, GO:0003909, GO:0003910, GO:0005524, GO:0006281, GO:0006310, GO:0051103	84	3822	0	1	0	0.478022	NA	UROBE1963355_EIv1.0_0004670	0.018462	0.022142	82
allind	UROBE1963355_EIv1.0_0004680	0	1	UROBE1963355_EIv1.0_0004680.1	Low	predicted_gene	Unknown protein	None	None	84	258	0	1	0	0.468992	NA	UROBE1963355_EIv1.0_0004680	0.023736	0.02619	52
allind	UROBE1963355_EIv1.0_0004690	0	1	UROBE1963355_EIv1.0_0004690.1	Low	transposable_element_gene	Unknown protein	None	None	84	555	1	2	8.47663e-05	0.522565	-0.909084	UROBE1963355_EIv1.0_0004690	0.081635	0.18704	31
allind	UROBE1963355_EIv1.0_0004700	0	1	UROBE1963355_EIv1.0_0004700.1	High	transposable_element_gene	Integrase catalytic domain-containing protein	None	GO:0000943, GO:0003676, GO:0015074	84	450	1	2	0.000550775	0.571429	0.285033	UROBE1963355_EIv1.0_0004700	0.091886	0.1544	44
allind	UROBE1963355_EIv1.0_0004710	0	1	UROBE1963355_EIv1.0_0004710.1	Low	transposable_element_gene	Unknown protein	None	None	84	229	1	2	0.00108231	0.480973	0.285033	UROBE1963355_EIv1.0_0004710	0.34598	0.49409	26
allind	UROBE1963355_EIv1.0_0004720	0	2	UROBE1963355_EIv1.0_0004720.1	High	protein_coding_gene	Unplaced genomic scaffold scaffold_9, whole genome shotgun sequence	None	None	84	1239	4	5	0.000577428	0.525164	-0.215461	UROBE1963355_EIv1.0_0004720	0.07237	0.18056	19
allind	UROBE1963355_EIv1.0_0004730	0	1	UROBE1963355_EIv1.0_0004730.1	High	transposable_element_gene	DUF4219 domain-containing protein	None	None	84	414	1	2	0.00116616	0.445911	1.68215	UROBE1963355_EIv1.0_0004730	0.13196	0.35428	25
allind	UROBE1963355_EIv1.0_0004740	0	3	UROBE1963355_EIv1.0_0004740.1	High	protein_coding_gene	26S proteasome regulatory subunit	IPR003959 (ATPase, AAA-type, core), IPR005937 (26S proteasome subunit P45), IPR027417 (P-loop containing nucleoside triphosphate hydrolase)	GO:0000166, GO:0000502, GO:0005524, GO:0005737, GO:0016787, GO:0030163, GO:0036402, GO:1901800	84	1182	14	5	0.000881699	0.476261	-1.75794	UROBE1963355_EIv1.0_0004740	0.22644	0.5482	49
allind	UROBE1963355_EIv1.0_0004750	0	3	UROBE1963355_EIv1.0_0004750.1	High	protein_coding_gene	Clathrin heavy chain	IPR016341 (Clathrin, heavy chain)	GO:0005198, GO:0005829, GO:0005905, GO:0006886, GO:0006895, GO:0006897, GO:0006898, GO:0016020, GO:0016192, GO:0030130, GO:0030132, GO:0030479, GO:0030659, GO:0031410, GO:0032051, GO:0048268, GO:0071439	84	5112	2	2	9.31515e-06	0.471051	-1.40128	UROBE1963355_EIv1.0_0004750	0.10689	0.26593	20
allind	UROBE1963355_EIv1.0_0004760	0	4	UROBE1963355_EIv1.0_0004760.1	High	protein_coding_gene	BPL/LPL catalytic domain-containing protein	IPR004408 (Biotin--acetyl-CoA-carboxylase ligase), IPR019197 (Biotin-protein ligase, N-terminal)	GO:0004077, GO:0006464	84	1812	1	2	3.84699e-05	0.481256	-0.774319	UROBE1963355_EIv1.0_0004760	0.084317	0.14917	10
allind	UROBE1963355_EIv1.0_0004770	0	1	UROBE1963355_EIv1.0_0004770.1	Low	predicted_gene	Unknown protein	None	None	84	221	0	1	0	0.425339	NA	UROBE1963355_EIv1.0_0004770	0.10129	0.15969	7
allind	UROBE1963355_EIv1.0_0004780	0	1	UROBE1963355_EIv1.0_0004780.1	Low	transposable_element_gene	Unknown protein	None	None	84	198	0	1	0	0.424242	NA	UROBE1963355_EIv1.0_0004780	0.12958	0.18807	14
allind	UROBE1963355_EIv1.0_0004790	0	1	UROBE1963355_EIv1.0_0004790.1	High	protein_coding_gene	Transcription elongation factor SPT5	IPR008991 (Translation protein SH3-like domain), IPR017071 (Transcription elongation factor Spt5)	GO:0005634, GO:0006355, GO:0006357, GO:0032784	84	3696	1	2	6.44197e-06	0.510008	-1.04726	UROBE1963355_EIv1.0_0004790	0.11256	0.20481	14
allind	UROBE1963355_EIv1.0_0004800	1	5	UROBE1963355_EIv1.0_0004800.1	High	protein_coding_gene	Secreted protein	IPR021476 (Protein of unknown function DUF3129)	None	84	885	0	1	0	0.498305	NA	UROBE1963355_EIv1.0_0004800	0.17133	0.23422	7
allind	UROBE1963355_EIv1.0_0004810	0	1	UROBE1963355_EIv1.0_0004810.1	Low	predicted_gene	Unknown protein	None	None	84	234	0	1	0	0.405983	NA	UROBE1963355_EIv1.0_0004810	0.051373	0.069652	26
allind	UROBE1963355_EIv1.0_0004820	0	2	UROBE1963355_EIv1.0_0004820.1	High	transposable_element_gene	Integrase catalytic domain-containing protein	None	GO:0000943, GO:0003676, GO:0015074	84	669	2	3	0.000236264	0.440832	-0.961888	UROBE1963355_EIv1.0_0004820	0.066408	0.05411	45
allind	UROBE1963355_EIv1.0_0004830	0	1	UROBE1963355_EIv1.0_0004830.1	Low	protein_coding_gene	PQ loop repeat-domain-containing protein	None	None	84	327	0	1	0	0.437309	NA	UROBE1963355_EIv1.0_0004830	0.11176	0.22112	12
allind	UROBE1963355_EIv1.0_0004840	0	1	UROBE1963355_EIv1.0_0004840.1	High	transposable_element_gene	Integrase catalytic domain-containing protein	None	GO:0000943, GO:0003676, GO:0008270, GO:0015074	84	564	0	1	0	0.437943	NA	UROBE1963355_EIv1.0_0004840	0.18304	0.28499	9
allind	UROBE1963355_EIv1.0_0004850	0	2	UROBE1963355_EIv1.0_0004850.1	High	protein_coding_gene	Cell surface protein Mas1, putative	IPR021476 (Protein of unknown function DUF3129)	None	84	939	1	2	7.42358e-05	0.531378	-0.774319	UROBE1963355_EIv1.0_0004850	0.1173	0.21483	20
allind	UROBE1963355_EIv1.0_0004860	0	1	UROBE1963355_EIv1.0_0004860.1	Low	predicted_gene	Unknown protein	None	None	84	237	0	1	0	0.455696	NA	UROBE1963355_EIv1.0_0004860	0.13077	0.21794	23
allind	UROBE1963355_EIv1.0_0004870	0	1	UROBE1963355_EIv1.0_0004870.1	Low	predicted_gene	Unknown protein	None	None	84	150	0	1	0	0.44	NA	UROBE1963355_EIv1.0_0004870	0.067142	0.070778	9
allind	UROBE1963355_EIv1.0_0004880	0	2	UROBE1963355_EIv1.0_0004880.1	High	protein_coding_gene	Josephin domain-containing protein	IPR006155 (Josephin domain), IPR033865 (Machado-Joseph disease protein)	GO:0004843, GO:0016579, GO:0016787	84	1164	0	1	0	0.511168	NA	UROBE1963355_EIv1.0_0004880	0.067911	0.086931	9
allind	UROBE1963355_EIv1.0_0004890	0	2	UROBE1963355_EIv1.0_0004890.1	High	protein_coding_gene	RNA polymerase II transcription factor B subunit 1	IPR005607 (BSD domain), IPR011993 (PH domain-like), IPR027079 (TFIIH subunit Tfb1/p62)	None	84	1944	2	3	0.000139742	0.510735	-0.509945	UROBE1963355_EIv1.0_0004890	0.08671	0.13484	13
allind	UROBE1963355_EIv1.0_0004900	0	1	UROBE1963355_EIv1.0_0004900.1	High	transposable_element_gene	Integrase catalytic domain-containing protein	None	GO:0000943, GO:0003676, GO:0015074	84	504	1	2	0.000702925	0.463837	0.917915	UROBE1963355_EIv1.0_0004900	0.19471	0.44286	23
allind	UROBE1963355_EIv1.0_0004910	0	2	UROBE1963355_EIv1.0_0004910.1	High	protein_coding_gene	PWWP domain-containing protein	IPR000313 (PWWP domain)	None	84	1728	2	2	2.75573e-05	0.506931	-1.40128	UROBE1963355_EIv1.0_0004910	0.03543	0.059477	15
allind	UROBE1963355_EIv1.0_0004920	0	1	UROBE1963355_EIv1.0_0004920.1	Low	predicted_gene	Unknown protein	None	None	84	267	1	2	8.91742e-05	0.441948	-1.04726	UROBE1963355_EIv1.0_0004920	0.016399	0.038331	10
allind	UROBE1963355_EIv1.0_0004930	0	2	UROBE1963355_EIv1.0_0004930.1	High	protein_coding_gene	ATP synthase F1, epsilon subunit	IPR001469 (ATP synthase, F1 complex, delta/epsilon subunit)	GO:0000275, GO:0005756, GO:0015986, GO:0016887, GO:0045261, GO:0046933, GO:0099132	84	531	1	2	0.000498632	0.525424	0.38568	UROBE1963355_EIv1.0_0004930	0.024441	0.061294	12
allind	UROBE1963355_EIv1.0_0004940	0	3	UROBE1963355_EIv1.0_0004940.1	High	protein_coding_gene	Trafficking protein particle complex subunit	IPR006722 (Trafficking protein particle complex subunit 2)	GO:0005737, GO:0006888, GO:0016192, GO:0030008	84	594	0	1	0	0.516835	NA	UROBE1963355_EIv1.0_0004940	0.11199	0.21123	52
allind	UROBE1963355_EIv1.0_0004950	0	2	UROBE1963355_EIv1.0_0004950.1	High	protein_coding_gene	RTP1_C1 domain-containing protein	IPR016024 (Armadillo-type fold)	None	84	3204	4	6	0.000157308	0.550967	-0.756228	UROBE1963355_EIv1.0_0004950	0.13896	0.21511	51
allind	UROBE1963355_EIv1.0_0004960	0	2	UROBE1963355_EIv1.0_0004960.1	High	transposable_element_gene	Integrase catalytic domain-containing protein	IPR012337 (Ribonuclease H-like domain)	GO:0000943, GO:0003676, GO:0015074	84	1674	1	2	0.000301599	0.451926	1.8135	UROBE1963355_EIv1.0_0004960	0.064619	0.22736	30
allind	UROBE1963355_EIv1.0_0004970	0	1	UROBE1963355_EIv1.0_0004970.1	High	transposable_element_gene	CCHC-type domain-containing protein	None	GO:0000943, GO:0003676, GO:0008270	84	411	0	1	0	0.440389	NA	UROBE1963355_EIv1.0_0004970	0.062106	0.23765	25
allind	UROBE1963355_EIv1.0_0004980	0	3	UROBE1963355_EIv1.0_0004980.1	High	protein_coding_gene	S-adenosyl-L-methionine-dependent methyltransferase	IPR029063 (S-adenosyl-L-methionine-dependent methyltransferase)	None	84	1695	0	1	0	0.510324	NA	UROBE1963355_EIv1.0_0004980	0.10405	0.22538	12
allind	UROBE1963355_EIv1.0_0004990	0	2	UROBE1963355_EIv1.0_0004990.1	High	protein_coding_gene	Transcription initiation factor IIA large subunit	IPR004855 (Transcription factor IIA, alpha/beta subunit), IPR009083 (Transcription factor IIA, helical)	None	84	570	0	1	0	0.501754	NA	UROBE1963355_EIv1.0_0004990	0.17558	0.27553	7
allind	UROBE1963355_EIv1.0_0005000	0	4	UROBE1963355_EIv1.0_0005000.1	High	protein_coding_gene	Unknown protein	IPR002765 (Uncharacterised protein family UPF0145)	None	84	3717	2	3	6.03513e-05	0.506582	-0.698255	UROBE1963355_EIv1.0_0005000	0.047706	0.066966	24
allind	UROBE1963355_EIv1.0_0005010	0	1	UROBE1963355_EIv1.0_0005010.1	High	transposable_element_gene	Integrase catalytic domain-containing protein	None	GO:0000943, GO:0003676, GO:0015074	84	1254	3	3	0.000549246	0.423378	0.27506	UROBE1963355_EIv1.0_0005010	0.13538	0.21347	17
allind	UROBE1963355_EIv1.0_0005020	0	1	UROBE1963355_EIv1.0_0005020.1	High	transposable_element_gene	Integrase catalytic domain-containing protein	IPR012337 (Ribonuclease H-like domain)	GO:0000943, GO:0003676, GO:0015074	84	1299	1	2	0.000134266	0.459658	-0.151673	UROBE1963355_EIv1.0_0005020	0.15344	0.23056	17
allind	UROBE1963355_EIv1.0_0005030	0	1	UROBE1963355_EIv1.0_0005030.1	High	transposable_element_gene	Integrase catalytic domain-containing protein	IPR029472 (Gag-polypeptide of LTR copia-type)	GO:0000943, GO:0003676, GO:0015074	84	525	1	2	0.000215829	0.455352	-0.515026	UROBE1963355_EIv1.0_0005030	0.16206	0.24983	40
allind	UROBE1963355_EIv1.0_0005040	0	1	UROBE1963355_EIv1.0_0005040.1	Low	transposable_element_gene	Unknown protein	None	None	84	291	0	1	0	0.515464	NA	UROBE1963355_EIv1.0_0005040	0.16841	0.30295	16
allind	UROBE1963355_EIv1.0_0005050	0	1	UROBE1963355_EIv1.0_0005050.1	High	protein_coding_gene	60S acidic ribosomal protein P0	IPR001790 (Ribosomal protein L10P)	GO:0005840, GO:0042254	84	939	2	2	0.000100203	0.514377	-1.21639	UROBE1963355_EIv1.0_0005050	0.13117	0.28427	15
allind	UROBE1963355_EIv1.0_0005060	0	1	UROBE1963355_EIv1.0_0005060.1	High	protein_coding_gene	SCP2 sterol-binding domain containing protein	IPR003033 (SCP2 sterol-binding domain)	None	84	390	1	2	0.000973123	0.472436	1.06803	UROBE1963355_EIv1.0_0005060	0.090721	0.16308	17
allind	UROBE1963355_EIv1.0_0005070	0	4	UROBE1963355_EIv1.0_0005070.1	High	protein_coding_gene	Dynamin-type G domain-containing protein	IPR022812 (Dynamin superfamily), IPR027091 (Transmembrane GTPase Fzo/Fzo1), IPR027417 (P-loop containing nucleoside triphosphate hydrolase)	GO:0003924, GO:0005525	84	2715	1	2	5.69497e-05	0.495365	-0.269379	UROBE1963355_EIv1.0_0005070	0.079384	0.12055	17
allind	UROBE1963355_EIv1.0_0005080	0	1	UROBE1963355_EIv1.0_0005080.1	High	protein_coding_gene	CRIB domain-containing protein	None	None	84	1452	2	3	0.000110438	0.460719	-0.952757	UROBE1963355_EIv1.0_0005080	0.01667	0.0076666	63
allind	UROBE1963355_EIv1.0_0005090	0	1	UROBE1963355_EIv1.0_0005090.1	High	protein_coding_gene	Unknown protein	None	None	84	1203	1	2	1.97918e-05	0.438913	-1.04726	UROBE1963355_EIv1.0_0005090	0.094206	0.16138	9
allind	UROBE1963355_EIv1.0_0005100	0	2	UROBE1963355_EIv1.0_0005100.1	High	protein_coding_gene	Ras-GAP domain-containing protein	IPR000593 (RasGAP protein, C-terminal), IPR008936 (Rho GTPase activation protein)	GO:0007165, GO:0043087	84	2427	3	5	0.000146327	0.465654	-0.755978	UROBE1963355_EIv1.0_0005100	0.076888	0.1348	13
allind	UROBE1963355_EIv1.0_0005110	0	3	UROBE1963355_EIv1.0_0005110.1	High	protein_coding_gene	Unknown protein	None	None	84	396	0	1	0	0.502525	NA	UROBE1963355_EIv1.0_0005110	0.21579	0.37315	4
allind	UROBE1963355_EIv1.0_0005120	0	1	UROBE1963355_EIv1.0_0005120.1	High	protein_coding_gene	Acyl-coenzyme A oxidase	IPR009075 (Acyl-CoA dehydrogenase/oxidase C-terminal), IPR012258 (Acyl-CoA oxidase), IPR013786 (Acyl-CoA dehydrogenase/oxidase, N-terminal)	None	84	2202	0	1	0	0.466848	NA	UROBE1963355_EIv1.0_0005120	0.21834	0.31156	7
allind	UROBE1963355_EIv1.0_0005130	0	1	UROBE1963355_EIv1.0_0005130.1	High	transposable_element_gene	Integrase catalytic domain-containing protein	None	GO:0000943, GO:0003676, GO:0015074	84	1104	0	1	0	0.447464	NA	UROBE1963355_EIv1.0_0005130	0.047085	0.083882	10
allind	UROBE1963355_EIv1.0_0005140	0	3	UROBE1963355_EIv1.0_0005140.1	High	protein_coding_gene	BZ3500_MvSof-1268-A1-R1_Chr7-3g09649 protein	IPR029005 (LIM-domain binding protein/SEUSS)	None	84	4596	9	19	0.00038785	0.516078	-0.023782	UROBE1963355_EIv1.0_0005140	0.059935	0.11734	28
allind	UROBE1963355_EIv1.0_0005150	0	1	UROBE1963355_EIv1.0_0005150.1	Low	protein_coding_gene	Unknown protein	None	None	84	573	0	1	0	0.589878	NA	UROBE1963355_EIv1.0_0005150	0.037867	0.047343	23
allind	UROBE1963355_EIv1.0_0005160	0	1	UROBE1963355_EIv1.0_0005160.1	Low	transposable_element_gene	Unknown protein	None	None	84	297	0	1	0	0.380471	NA	UROBE1963355_EIv1.0_0005160	0.16728	0.38595	21
allind	UROBE1963355_EIv1.0_0005170	0	1	UROBE1963355_EIv1.0_0005170.1	High	protein_coding_gene	Polar growth protein	None	None	84	1371	1	2	3.43146e-05	0.47263	-0.909084	UROBE1963355_EIv1.0_0005170	0.062856	0.22757	28
allind	UROBE1963355_EIv1.0_0005180	0	2	UROBE1963355_EIv1.0_0005180.1	High	protein_coding_gene	Transcription factor, putative	IPR003163 (Transcription regulator HTH, APSES-type DNA-binding domain), IPR018004 (KilA, N-terminal/APSES-type HTH, DNA-binding), IPR020683 (Ankyrin repeat-containing domain), IPR029793 (MBF transcription factor complex subunit Mbp1/Res1/Res2)	GO:0000083, GO:0000790, GO:0001228, GO:0003677, GO:0005737, GO:0030907, GO:0033309, GO:0045944, GO:0071931	84	2562	2	3	3.65015e-05	0.471107	-1.21867	UROBE1963355_EIv1.0_0005180	0.11124	0.33579	12
allind	UROBE1963355_EIv1.0_0005190	0	1	UROBE1963355_EIv1.0_0005190.1	Low	protein_coding_gene	Unknown protein	None	None	84	330	0	1	0	0.539394	NA	UROBE1963355_EIv1.0_0005190	0.14333	0.50603	6
allind	UROBE1963355_EIv1.0_0005200	0	1	UROBE1963355_EIv1.0_0005200.1	High	transposable_element_gene	Integrase catalytic domain-containing protein	None	GO:0000943, GO:0003676, GO:0015074	84	357	1	2	0.00013178	0.470521	-0.909084	UROBE1963355_EIv1.0_0005200	0.075041	0.26133	29
allind	UROBE1963355_EIv1.0_0005210	0	2	UROBE1963355_EIv1.0_0005210.1	Low	transposable_element_gene	Unknown protein	None	None	84	345	0	1	0	0.423188	NA	UROBE1963355_EIv1.0_0005210	0.13178	0.34476	20
allind	UROBE1963355_EIv1.0_0005220	0	2	UROBE1963355_EIv1.0_0005220.1	High	protein_coding_gene	WD_REPEATS_REGION domain-containing protein	IPR015943 (WD40/YVTN repeat-like-containing domain)	None	84	1494	1	2	1.59368e-05	0.475912	-1.04726	UROBE1963355_EIv1.0_0005220	0.083032	0.24261	18
allind	UROBE1963355_EIv1.0_0005230	0	2	UROBE1963355_EIv1.0_0005230.1	High	protein_coding_gene	Nuclear protein localization protein 4	IPR001876 (Zinc finger, RanBP2-type), IPR016563 (Nuclear protein localization protein 4), IPR024682 (Nuclear pore localisation protein Npl4, ubiquitin-like domain)	None	84	2094	0	1	0	0.462273	NA	UROBE1963355_EIv1.0_0005230	0.12626	0.27332	6
allind	UROBE1963355_EIv1.0_0005240	0	3	UROBE1963355_EIv1.0_0005240.1	High	protein_coding_gene	Mitochondrial carrier	IPR002067 (Mitochondrial carrier protein), IPR023395 (Mitochondrial carrier domain)	GO:0016020, GO:0016021, GO:0022857, GO:0055085	84	942	0	1	0	0.492569	NA	UROBE1963355_EIv1.0_0005240	0.2372	0.4171	11
allind	UROBE1963355_EIv1.0_0005250	0	1	UROBE1963355_EIv1.0_0005250.1	Low	transposable_element_gene	Unknown protein	None	None	84	347	0	1	0	0.492795	NA	UROBE1963355_EIv1.0_0005250	0.29832	0.47679	10
allind	UROBE1963355_EIv1.0_0005260	0	1	UROBE1963355_EIv1.0_0005260.1	High	transposable_element_gene	Integrase catalytic domain-containing protein	None	GO:0003676, GO:0015074	84	288	1	2	8.2672e-05	0.444403	-1.04726	UROBE1963355_EIv1.0_0005260	0.105	0.20836	23
allind	UROBE1963355_EIv1.0_0005270	0	1	UROBE1963355_EIv1.0_0005270.1	Low	transposable_element_gene	Unknown protein	None	None	84	678	6	6	0.00034525	0.573887	-1.86138	UROBE1963355_EIv1.0_0005270	0.059581	0.22437	25
allind	UROBE1963355_EIv1.0_0005280	0	2	UROBE1963355_EIv1.0_0005280.1	High	protein_coding_gene	Family 2 glycoside hydrolase	IPR006102 (Glycoside hydrolase, family 2, immunoglobulin-like beta-sandwich), IPR008979 (Galactose-binding domain-like), IPR017853 (Glycoside hydrolase superfamily)	GO:0016787	84	3048	1	2	1.54348e-05	0.47901	-0.909084	UROBE1963355_EIv1.0_0005280	0.046401	0.095516	39
allind	UROBE1963355_EIv1.0_0005290	0	1	UROBE1963355_EIv1.0_0005290.1	High	transposable_element_gene	Integrase catalytic domain-containing protein	None	GO:0000943, GO:0003676, GO:0015074	84	294	2	2	0.00222269	0.380952	1.00908	UROBE1963355_EIv1.0_0005290	0.064399	0.1129	22
allind	UROBE1963355_EIv1.0_0005300	0	1	UROBE1963355_EIv1.0_0005300.1	High	transposable_element_gene	Unknown protein	None	None	84	714	0	1	0	0.477591	NA	UROBE1963355_EIv1.0_0005300	0.12921	0.17384	63
allind	UROBE1963355_EIv1.0_0005310	0	4	UROBE1963355_EIv1.0_0005310.1	High	protein_coding_gene	Unplaced genomic scaffold scaffold_74, whole genome shotgun sequence	None	GO:0016020, GO:0016021	84	864	1	2	5.44506e-05	0.554426	-0.909084	UROBE1963355_EIv1.0_0005310	0.073241	0.14545	26
allind	UROBE1963355_EIv1.0_0005320	0	1	UROBE1963355_EIv1.0_0005320.1	Low	predicted_gene	Unknown protein	None	None	84	225	0	1	0	0.56	NA	UROBE1963355_EIv1.0_0005320	0.023722	0.029122	52
allind	UROBE1963355_EIv1.0_0005330	0	1	UROBE1963355_EIv1.0_0005330.1	High	protein_coding_gene	Histone H4	IPR001951 (Histone H4), IPR009072 (Histone-fold)	None	84	315	40	32	0.0504266	0.542782	3.14333	UROBE1963355_EIv1.0_0005330	0.023722	0.029122	52
allind	UROBE1963355_EIv1.0_0005340	0	1	UROBE1963355_EIv1.0_0005340.1	High	protein_coding_gene	TLC domain-containing protein	IPR016439 (Ceramide synthase component Lag1/Lac1)	GO:0016020, GO:0016021	84	1098	0	1	0	0.451642	NA	UROBE1963355_EIv1.0_0005340	0.038194	0.049302	59
allind	UROBE1963355_EIv1.0_0005350	0	2	UROBE1963355_EIv1.0_0005350.1	High	protein_coding_gene	Copper-bind domain-containing protein	IPR008972 (Cupredoxin)	GO:0005507, GO:0009055, GO:0022900	84	834	0	1	0	0.491607	NA	UROBE1963355_EIv1.0_0005350	0.1427	0.30882	15
allind	UROBE1963355_EIv1.0_0005360	0	1	UROBE1963355_EIv1.0_0005360.1	High	transposable_element_gene	Integrase catalytic domain-containing protein	None	GO:0000943, GO:0003676, GO:0015074	84	549	1	2	0.000913359	0.458192	1.79303	UROBE1963355_EIv1.0_0005360	0.19861	0.32677	31
allind	UROBE1963355_EIv1.0_0005370	0	1	UROBE1963355_EIv1.0_0005370.1	Low	transposable_element_gene	Unknown protein	None	None	84	234	0	1	0	0.388889	NA	UROBE1963355_EIv1.0_0005370	0.19285	0.35328	8
allind	UROBE1963355_EIv1.0_0005380	0	4	UROBE1963355_EIv1.0_0005380.1	High	protein_coding_gene	6-phosphogluconate dehydrogenase, decarboxylating	IPR006183 (6-phosphogluconate dehydrogenase), IPR008927 (6-phosphogluconate dehydrogenase C-terminal domain-like), IPR013328 (6-phosphogluconate dehydrogenase, domain 2), IPR016040 (NAD(P)-binding domain)	GO:0004616, GO:0006098, GO:0016491, GO:0019521, GO:0050661, GO:0055114	84	1476	0	1	0	0.490515	NA	UROBE1963355_EIv1.0_0005380	0.1212	0.23617	19
allind	UROBE1963355_EIv1.0_0005390	0	3	UROBE1963355_EIv1.0_0005390.1	High	protein_coding_gene	DNA-directed RNA polymerase I and III	IPR009025 (DNA-directed RNA polymerase, RBP11-like dimerisation domain), IPR033898 (DNA-directed RNA polymerases I and III subunit AC19)	GO:0003677, GO:0003899, GO:0006351, GO:0046983	84	465	0	1	0	0.524731	NA	UROBE1963355_EIv1.0_0005390	0.053997	0.14133	16
allind	UROBE1963355_EIv1.0_0005400	0	1	UROBE1963355_EIv1.0_0005400.1	High	protein_coding_gene	PUM-HD domain-containing protein	IPR016024 (Armadillo-type fold)	GO:0003723	84	2931	0	1	0	0.499147	NA	UROBE1963355_EIv1.0_0005400	0.10537	0.2409	16
allind	UROBE1963355_EIv1.0_0005410	0	1	UROBE1963355_EIv1.0_0005410.1	Low	predicted_gene	Unknown protein	None	None	84	255	0	1	0	0.47451	NA	UROBE1963355_EIv1.0_0005410	0.079194	0.19345	8
allind	UROBE1963355_EIv1.0_0005420	0	1	UROBE1963355_EIv1.0_0005420.1	High	transposable_element_gene	Integrase catalytic domain-containing protein	None	None	84	267	0	1	0	0.41573	NA	UROBE1963355_EIv1.0_0005420	0.21807	0.54152	13
allind	UROBE1963355_EIv1.0_0005430	0	1	UROBE1963355_EIv1.0_0005430.1	High	transposable_element_gene	Integrase catalytic domain-containing protein	None	GO:0000943, GO:0003676, GO:0015074	84	843	2	3	0.000658115	0.459385	0.616486	UROBE1963355_EIv1.0_0005430	0.20523	0.5456	31
allind	UROBE1963355_EIv1.0_0005440	0	1	UROBE1963355_EIv1.0_0005440.1	High	transposable_element_gene	Integrase catalytic domain-containing protein	IPR013103 (Reverse transcriptase, RNA-dependent DNA polymerase)	None	84	1077	0	1	0	0.471681	NA	UROBE1963355_EIv1.0_0005440	0.19475	0.51024	12
allind	UROBE1963355_EIv1.0_0005450	0	1	UROBE1963355_EIv1.0_0005450.1	High	protein_coding_gene	Ribonuclease P/MRP protein subunit POP5	IPR002759 (Ribonuclease P/MRP protein subunit)	GO:0004526, GO:0004540, GO:0008033, GO:0016070, GO:0016787, GO:0090501, GO:0090502	84	477	0	1	0	0.515723	NA	UROBE1963355_EIv1.0_0005450	0.11932	0.2581	20
allind	UROBE1963355_EIv1.0_0005460	0	1	UROBE1963355_EIv1.0_0005460.1	High	protein_coding_gene	Inositol phospholipid biosynthesis protein Scs3	IPR019388 (Fat storage-inducing transmembrane protein)	GO:0005789, GO:0019915	84	885	1	2	2.70563e-05	0.584104	-1.04726	UROBE1963355_EIv1.0_0005460	0.11521	0.25044	23
allind	UROBE1963355_EIv1.0_0005470	0	1	UROBE1963355_EIv1.0_0005470.1	Low	transposable_element_gene	Unknown protein	None	None	84	225	0	1	0	0.364444	NA	UROBE1963355_EIv1.0_0005470	0.29077	0.51159	21
allind	UROBE1963355_EIv1.0_0005480	0	1	UROBE1963355_EIv1.0_0005480.1	Low	transposable_element_gene	Unknown protein	None	None	84	366	1	2	0.000128539	0.431629	-0.909084	UROBE1963355_EIv1.0_0005480	0.37492	0.62444	17
allind	UROBE1963355_EIv1.0_0005490	0	1	UROBE1963355_EIv1.0_0005490.1	High	protein_coding_gene	Riboflavin synthase, alpha subunit	IPR001783 (Lumazine-binding protein), IPR023366 (ATP synthase subunit alpha-like domain), IPR026017 (Lumazine-binding domain)	GO:0004746, GO:0016740	84	891	0	1	0	0.462402	NA	UROBE1963355_EIv1.0_0005490	0.073579	0.11147	20
allind	UROBE1963355_EIv1.0_0005500	0	4	UROBE1963355_EIv1.0_0005500.1	High	protein_coding_gene	L-type lectin-like domain-containing protein	IPR013320 (Concanavalin A-like lectin/glucanase domain)	None	84	1062	0	1	0	0.451977	NA	UROBE1963355_EIv1.0_0005500	0.051185	0.064426	25
allind	UROBE1963355_EIv1.0_0005510	0	1	UROBE1963355_EIv1.0_0005510.1	High	protein_coding_gene	Ribosomal RNA methyltransferase FtsJ domain-containing protein	IPR015507 (Ribosomal RNA large subunit methyltransferase E), IPR029063 (S-adenosyl-L-methionine-dependent methyltransferase)	None	84	1005	3	3	0.000505219	0.450486	-0.284343	UROBE1963355_EIv1.0_0005510	0.079837	0.182	44
allind	UROBE1963355_EIv1.0_0005520	0	5	UROBE1963355_EIv1.0_0005520.1	High	protein_coding_gene	SWIM-type domain-containing protein	IPR007527 (Zinc finger, SWIM-type)	GO:0008270	84	420	0	1	0	0.380952	NA	UROBE1963355_EIv1.0_0005520	0.11587	0.25804	34
allind	UROBE1963355_EIv1.0_0005530	0	1	UROBE1963355_EIv1.0_0005530.1	Low	transposable_element_gene	Unknown protein	None	None	84	162	1	2	0.000430293	0.50022	-0.774319	UROBE1963355_EIv1.0_0005530	0.073901	0.2758	24
allind	UROBE1963355_EIv1.0_0005540	0	1	UROBE1963355_EIv1.0_0005540.1	High	transposable_element_gene	BZ3500_MvSof-1268-A1- protein	None	GO:0000943, GO:0003676, GO:0008270, GO:0015074	84	651	0	1	0	0.436252	NA	UROBE1963355_EIv1.0_0005540	0.030686	0.048317	37
allind	UROBE1963355_EIv1.0_0005550	0	1	UROBE1963355_EIv1.0_0005550.1	Low	transposable_element_gene	Unknown protein	None	None	84	177	0	1	0	0.412429	NA	UROBE1963355_EIv1.0_0005550	0.040786	0.060031	56
allind	UROBE1963355_EIv1.0_0005560	0	1	UROBE1963355_EIv1.0_0005560.1	High	transposable_element_gene	Integrase catalytic domain-containing protein	IPR012337 (Ribonuclease H-like domain), IPR013103 (Reverse transcriptase, RNA-dependent DNA polymerase)	GO:0000943, GO:0003676, GO:0015074	84	963	0	1	0	0.478712	NA	UROBE1963355_EIv1.0_0005560	0.081984	0.083732	15
allind	UROBE1963355_EIv1.0_0005570	0	1	UROBE1963355_EIv1.0_0005570.1	High	transposable_element_gene	Integrase catalytic domain-containing protein	None	GO:0000943, GO:0003676, GO:0015074	84	579	1	2	0.000120393	0.457624	-0.774319	UROBE1963355_EIv1.0_0005570	0.10203	0.09673	15
allind	UROBE1963355_EIv1.0_0005580	0	1	UROBE1963355_EIv1.0_0005580.1	High	protein_coding_gene	White collar 1 protein	IPR000014 (PAS domain)	GO:0006355, GO:0008270, GO:0043565, GO:0046872	84	2994	1	2	7.95241e-06	0.516366	-1.04726	UROBE1963355_EIv1.0_0005580	0.030252	0.09102	8
allind	UROBE1963355_EIv1.0_0005590	0	1	UROBE1963355_EIv1.0_0005590.1	Low	predicted_gene	Unknown protein	None	None	84	237	0	1	0	0.535865	NA	UROBE1963355_EIv1.0_0005590	0.0048642	0.0064104	8
allind	UROBE1963355_EIv1.0_0005600	0	1	UROBE1963355_EIv1.0_0005600.1	High	transposable_element_gene	Retrotransposable element Tf2 155 kDa protein type 1	IPR000477 (Reverse transcriptase domain)	GO:0003676, GO:0008270, GO:0015074	84	720	1	2	0.00018646	0.473512	-0.390496	UROBE1963355_EIv1.0_0005600	0.001977	0.00024908	27
allind	UROBE1963355_EIv1.0_0005610	0	1	UROBE1963355_EIv1.0_0005610.1	High	transposable_element_gene	Reverse transcriptase domain-containing protein	None	None	84	1125	0	1	0	0.512	NA	UROBE1963355_EIv1.0_0005610	0.0037019	0.00049407	34
allind	UROBE1963355_EIv1.0_0005620	0	2	UROBE1963355_EIv1.0_0005620.1	High	protein_coding_gene	60S ribosomal protein L10	IPR001197 (Ribosomal protein L10e), IPR016180 (Ribosomal protein L10e/L16)	GO:0003735, GO:0005840, GO:0006412	84	663	22	12	0.00279203	0.53171	-1.73629	UROBE1963355_EIv1.0_0005620	0.10174	0.12948	29
allind	UROBE1963355_EIv1.0_0005630	0	3	UROBE1963355_EIv1.0_0005630.1	High	protein_coding_gene	Dynamin-GTPase protein	IPR000375 (Dynamin central domain), IPR001401 (Dynamin, GTPase domain), IPR020850 (GTPase effector domain), IPR022812 (Dynamin superfamily), IPR027417 (P-loop containing nucleoside triphosphate hydrolase)	None	84	2523	0	1	0	0.463734	NA	UROBE1963355_EIv1.0_0005630	0.15276	0.23572	34
allind	UROBE1963355_EIv1.0_0005640	0	3	UROBE1963355_EIv1.0_0005640.1	High	protein_coding_gene	WD_REPEATS_REGION domain-containing protein	IPR015943 (WD40/YVTN repeat-like-containing domain)	None	84	1446	1	2	0.000235679	0.53443	0.837738	UROBE1963355_EIv1.0_0005640	0.20767	0.36501	14
allind	UROBE1963355_EIv1.0_0005650	0	1	UROBE1963355_EIv1.0_0005650.1	High	protein_coding_gene	MRP-L46 domain-containing protein	IPR021757 (Ribosomal protein L46)	GO:0003735	84	945	0	1	0	0.524868	NA	UROBE1963355_EIv1.0_0005650	0.16616	0.3462	14
allind	UROBE1963355_EIv1.0_0005660	0	1	UROBE1963355_EIv1.0_0005660.1	High	transposable_element_gene	Integrase catalytic domain-containing protein	None	GO:0003676, GO:0015074	84	540	1	2	0.000248614	0.427646	-0.390496	UROBE1963355_EIv1.0_0005660	0.10264	0.22479	29
allind	UROBE1963355_EIv1.0_0005670	0	2	UROBE1963355_EIv1.0_0005670.1	High	protein_coding_gene	Cytochrome P450 monooxygenase 67	IPR001128 (Cytochrome P450)	None	84	1656	0	1	0	0.464372	NA	UROBE1963355_EIv1.0_0005670	0.27096	0.43915	12
allind	UROBE1963355_EIv1.0_0005680	0	1	UROBE1963355_EIv1.0_0005680.1	Low	protein_coding_gene	Unknown protein	None	None	84	246	0	1	0	0.45935	NA	UROBE1963355_EIv1.0_0005680	0.30614	0.47388	11
allind	UROBE1963355_EIv1.0_0005690	0	1	UROBE1963355_EIv1.0_0005690.1	High	transposable_element_gene	Integrase catalytic domain-containing protein	None	GO:0000943, GO:0003676, GO:0015074	84	402	0	1	0	0.455224	NA	UROBE1963355_EIv1.0_0005690	0.21962	0.39057	19
allind	UROBE1963355_EIv1.0_0005700	0	1	UROBE1963355_EIv1.0_0005700.1	High	transposable_element_gene	Integrase catalytic domain-containing protein	IPR012337 (Ribonuclease H-like domain)	GO:0000943, GO:0003676, GO:0015074	84	642	1	2	0.000386057	0.473743	0.285033	UROBE1963355_EIv1.0_0005700	0.21389	0.38289	22
allind	UROBE1963355_EIv1.0_0005710	0	1	UROBE1963355_EIv1.0_0005710.1	High	transposable_element_gene	Integrase catalytic domain-containing protein	None	GO:0000943, GO:0003676, GO:0015074	84	213	0	1	0	0.507042	NA	UROBE1963355_EIv1.0_0005710	0.3768	0.5094	10
allind	UROBE1963355_EIv1.0_0005720	0	1	UROBE1963355_EIv1.0_0005720.1	High	transposable_element_gene	Integrase catalytic domain-containing protein	None	None	84	351	0	1	0	0.478633	NA	UROBE1963355_EIv1.0_0005720	0.30419	0.45185	9
allind	UROBE1963355_EIv1.0_0005730	0	4	UROBE1963355_EIv1.0_0005730.1	High	protein_coding_gene	TPT domain-containing protein	IPR004853 (Sugar phosphate transporter domain)	GO:0004576, GO:0006486, GO:0016020, GO:0016021	84	1299	0	1	0	0.488068	NA	UROBE1963355_EIv1.0_0005730	0.35908	0.43102	104
allind	UROBE1963355_EIv1.0_0005740	0	2	UROBE1963355_EIv1.0_0005740.1	High	transposable_element_gene	Integrase catalytic domain-containing protein	IPR013103 (Reverse transcriptase, RNA-dependent DNA polymerase)	GO:0000943, GO:0003676, GO:0015074	84	1203	0	1	0	0.526185	NA	UROBE1963355_EIv1.0_0005740	0.029766	0.087414	23
allind	UROBE1963355_EIv1.0_0005750	0	2	UROBE1963355_EIv1.0_0005750.1	High	transposable_element_gene	Integrase catalytic domain-containing protein	None	None	84	1281	1	2	3.67255e-05	0.524609	-0.909084	UROBE1963355_EIv1.0_0005750	-0.003485	-0.00041369	66
allind	UROBE1963355_EIv1.0_0005760	0	2	UROBE1963355_EIv1.0_0005760.1	Low	predicted_gene	Unknown protein	None	None	84	255	0	1	0	0.52549	NA	UROBE1963355_EIv1.0_0005760	0.10627	0.099457	34
allind	UROBE1963355_EIv1.0_0005770	0	2	UROBE1963355_EIv1.0_0005770.1	High	protein_coding_gene	WD_REPEATS_REGION domain-containing protein	None	None	84	2604	1	2	0.00013605	0.508151	0.917915	UROBE1963355_EIv1.0_0005770	0.10816	0.099094	34
allind	UROBE1963355_EIv1.0_0005780	0	1	UROBE1963355_EIv1.0_0005780.1	High	protein_coding_gene	WD_REPEATS_REGION domain-containing protein	IPR015943 (WD40/YVTN repeat-like-containing domain), IPR024977 (Anaphase-promoting complex subunit 4, WD40 domain)	None	84	2514	0	1	0	0.5	NA	UROBE1963355_EIv1.0_0005780	0.030034	0.049635	56
allind	UROBE1963355_EIv1.0_0005790	0	1	UROBE1963355_EIv1.0_0005790.1	Low	protein_coding_gene	Unknown protein	None	None	84	387	0	1	0	0.571059	NA	UROBE1963355_EIv1.0_0005790	0.0073612	0.00050623	4
allind	UROBE1963355_EIv1.0_0005800	0	1	UROBE1963355_EIv1.0_0005800.1	High	protein_coding_gene	Unknown protein	None	None	84	225	1	2	0.00131956	0.61254	0.576738	UROBE1963355_EIv1.0_0005800	0.17304	0.34755	10
allind	UROBE1963355_EIv1.0_0005810	0	1	UROBE1963355_EIv1.0_0005810.1	Low	predicted_gene	Unknown protein	None	None	84	204	0	1	0	0.495098	NA	UROBE1963355_EIv1.0_0005810	0.16291	0.33547	11
allind	UROBE1963355_EIv1.0_0005820	0	3	UROBE1963355_EIv1.0_0005820.1	High	protein_coding_gene	Cytochrome c oxidase assembly protein COX11	IPR007533 (Cytochrome c oxidase assembly protein CtaG/Cox11), IPR023471 (Cytochrome c oxidase assembly protein CtaG/Cox11, domain)	GO:0005507, GO:0016020, GO:0016021	84	768	0	1	0	0.514323	NA	UROBE1963355_EIv1.0_0005820	0.14874	0.34105	12
allind	UROBE1963355_EIv1.0_0005830	0	2	UROBE1963355_EIv1.0_0005830.1	High	protein_coding_gene	Unknown protein	None	None	84	1140	1	2	4.12678e-05	0.55967	-0.909084	UROBE1963355_EIv1.0_0005830	0.14088	0.3378	13
allind	UROBE1963355_EIv1.0_0005840	0	2	UROBE1963355_EIv1.0_0005840.1	High	protein_coding_gene	Unknown protein	IPR019038 (DNA polymerase subunit Cdc27)	None	84	1209	0	1	0	0.46402	NA	UROBE1963355_EIv1.0_0005840	0.1007	0.46682	10
allind	UROBE1963355_EIv1.0_0005850	0	2	UROBE1963355_EIv1.0_0005850.1	Low	predicted_gene	Unknown protein	None	None	84	231	0	1	0	0.515151	NA	UROBE1963355_EIv1.0_0005850	0.081659	0.49621	10
allind	UROBE1963355_EIv1.0_0005860	0	1	UROBE1963355_EIv1.0_0005860.1	High	protein_coding_gene	Origin recognition complex subunit 1	IPR003959 (ATPase, AAA-type, core), IPR011991 (Winged helix-turn-helix DNA-binding domain), IPR027417 (P-loop containing nucleoside triphosphate hydrolase)	GO:0000166, GO:0003677, GO:0005524, GO:0005634, GO:0006260	84	1377	1	2	1.72909e-05	0.482199	-1.04726	UROBE1963355_EIv1.0_0005860	0.081659	0.49621	10
allind	UROBE1963355_EIv1.0_0005870	0	1	UROBE1963355_EIv1.0_0005870.1	High	protein_coding_gene	Secreted protein	IPR021476 (Protein of unknown function DUF3129)	None	84	1128	0	1	0	0.49734	NA	UROBE1963355_EIv1.0_0005870	0.06058	0.43662	13
allind	UROBE1963355_EIv1.0_0005880	0	1	UROBE1963355_EIv1.0_0005880.1	High	protein_coding_gene	Unknown protein	None	None	84	1248	2	3	5.67747e-05	0.451904	-1.30883	UROBE1963355_EIv1.0_0005880	0.077894	0.13075	25
allind	UROBE1963355_EIv1.0_0005890	0	1	UROBE1963355_EIv1.0_0005890.1	High	protein_coding_gene	BTB domain-containing protein	IPR000938 (CAP Gly-rich domain), IPR011333 (SKP1/BTB/POZ domain)	None	84	3852	3	4	7.45453e-05	0.524891	-0.966087	UROBE1963355_EIv1.0_0005890	0.090438	0.13106	16
allind	UROBE1963355_EIv1.0_0005900	0	1	UROBE1963355_EIv1.0_0005900.1	High	transposable_element_gene	Integrase catalytic domain-containing protein	None	GO:0000943, GO:0003676, GO:0015074	84	789	1	2	0.000269046	0.415565	0.073503	UROBE1963355_EIv1.0_0005900	0.034014	0.046193	58
allind	UROBE1963355_EIv1.0_0005910	0	1	UROBE1963355_EIv1.0_0005910.1	High	transposable_element_gene	DDE Tnp4 domain-containing protein	None	None	84	1098	0	1	0	0.509108	NA	UROBE1963355_EIv1.0_0005910	0.10167	0.20952	12
allind	UROBE1963355_EIv1.0_0005920	0	1	UROBE1963355_EIv1.0_0005920.1	High	protein_coding_gene	Unplaced genomic scaffold PAXINscaffold_47, whole genome shotgun sequence	None	None	84	564	0	1	0	0.533688	NA	UROBE1963355_EIv1.0_0005920	0.10358	0.24809	8
allind	UROBE1963355_EIv1.0_0005930	0	1	UROBE1963355_EIv1.0_0005930.1	High	protein_coding_gene	Bystin-domain-containing protein	IPR007955 (Bystin)	None	84	1461	1	2	4.77121e-05	0.459274	-0.774319	UROBE1963355_EIv1.0_0005930	0.066028	0.056051	22
allind	UROBE1963355_EIv1.0_0005940	0	1	UROBE1963355_EIv1.0_0005940.1	High	transposable_element_gene	Integrase catalytic domain-containing protein	IPR013103 (Reverse transcriptase, RNA-dependent DNA polymerase)	GO:0000943, GO:0003676, GO:0015074	84	1494	2	3	0.0001634	0.511419	-0.619507	UROBE1963355_EIv1.0_0005940	0.13547	0.25645	12
allind	UROBE1963355_EIv1.0_0005950	0	1	UROBE1963355_EIv1.0_0005950.1	High	transposable_element_gene	Integrase catalytic domain-containing protein	None	GO:0000943, GO:0003676, GO:0015074	84	426	0	1	0	0.549296	NA	UROBE1963355_EIv1.0_0005950	0.10742	0.23795	11
allind	UROBE1963355_EIv1.0_0005960	0	2	UROBE1963355_EIv1.0_0005960.1	High	protein_coding_gene	DNA repair and recombination protein	IPR000330 (SNF2-related, N-terminal domain), IPR001650 (Helicase, C-terminal), IPR027417 (P-loop containing nucleoside triphosphate hydrolase)	None	84	3093	0	1	0	0.445522	NA	UROBE1963355_EIv1.0_0005960	0.052103	0.042418	36
allind	UROBE1963355_EIv1.0_0005970	0	1	UROBE1963355_EIv1.0_0005970.1	Low	transposable_element_gene	Unknown protein	None	None	84	291	1	2	8.18197e-05	0.457004	-1.04726	UROBE1963355_EIv1.0_0005970	0.12933	0.24198	21
allind	UROBE1963355_EIv1.0_0005980	0	1	UROBE1963355_EIv1.0_0005980.1	Low	transposable_element_gene	Integrase catalytic domain-containing protein	IPR013103 (Reverse transcriptase, RNA-dependent DNA polymerase)	GO:0000943, GO:0003676, GO:0015074	84	987	19	37	0.00822802	0.496345	3.34518	UROBE1963355_EIv1.0_0005980	0.064583	0.078285	45
allind	UROBE1963355_EIv1.0_0005990	0	2	UROBE1963355_EIv1.0_0005990.1	High	protein_coding_gene	E2 ubiquitin-conjugating enzyme	IPR016135 (Ubiquitin-conjugating enzyme/RWD-like)	GO:0000166, GO:0005524, GO:0016740	84	444	0	1	0	0.506757	NA	UROBE1963355_EIv1.0_0005990	0.1298	0.33643	14
allind	UROBE1963355_EIv1.0_0006000	0	2	UROBE1963355_EIv1.0_0006000.1	Low	predicted_gene	Unknown protein	None	None	84	291	0	1	0	0.505155	NA	UROBE1963355_EIv1.0_0006000	0.10708	0.29916	13
allind	UROBE1963355_EIv1.0_0006010	0	1	UROBE1963355_EIv1.0_0006010.1	Low	predicted_gene	Unknown protein	None	None	84	363	0	1	0	0.424242	NA	UROBE1963355_EIv1.0_0006010	0.024888	0.028419	36
allind	UROBE1963355_EIv1.0_0006020	0	4	UROBE1963355_EIv1.0_0006020.1	High	protein_coding_gene	ML domain-containing protein	None	GO:0005623, GO:0032366	84	1143	0	1	0	0.467192	NA	UROBE1963355_EIv1.0_0006020	0.014391	0.017785	107
allind	UROBE1963355_EIv1.0_0006030	0	1	UROBE1963355_EIv1.0_0006030.1	Low	predicted_gene	Unknown protein	None	None	84	192	0	1	0	0.489583	NA	UROBE1963355_EIv1.0_0006030	0.014391	0.017785	107
allind	UROBE1963355_EIv1.0_0006040	0	3	UROBE1963355_EIv1.0_0006040.1	High	transposable_element_gene	Integrase catalytic domain-containing protein	None	GO:0000943, GO:0003676, GO:0015074	84	390	0	1	0	0.45641	NA	UROBE1963355_EIv1.0_0006040	0.027247	0.014452	42
allind	UROBE1963355_EIv1.0_0006050	0	1	UROBE1963355_EIv1.0_0006050.1	High	protein_coding_gene	J domain-containing protein	IPR001623 (DnaJ domain)	None	84	1629	0	1	0	0.590546	NA	UROBE1963355_EIv1.0_0006050	0.08733	0.15819	48
allind	UROBE1963355_EIv1.0_0006060	0	1	UROBE1963355_EIv1.0_0006060.1	Low	predicted_gene	Unknown protein	None	None	84	213	1	2	0.00228951	0.528616	1.71115	UROBE1963355_EIv1.0_0006060	0.15224	0.61873	9
allind	UROBE1963355_EIv1.0_0006070	0	1	UROBE1963355_EIv1.0_0006070.1	High	protein_coding_gene	Small RNA 2-O-methyltransferase	IPR026610 (3'-RNA ribose 2'-O-methyltransferase, Hen1), IPR029063 (S-adenosyl-L-methionine-dependent methyltransferase)	None	84	1389	2	3	0.000384961	0.543985	0.536598	UROBE1963355_EIv1.0_0006070	0.14379	0.56478	10
allind	UROBE1963355_EIv1.0_0006080	0	3	UROBE1963355_EIv1.0_0006080.1	High	protein_coding_gene	Ubiquitin-like domain-containing protein	IPR029071 (Ubiquitin-related domain)	GO:0006464	84	240	0	1	0	0.445833	NA	UROBE1963355_EIv1.0_0006080	0.085861	0.55445	11
allind	UROBE1963355_EIv1.0_0006090	0	1	UROBE1963355_EIv1.0_0006090.1	High	transposable_element_gene	Integrase catalytic domain-containing protein	IPR012337 (Ribonuclease H-like domain)	GO:0000943, GO:0003676, GO:0015074	84	1134	2	3	4.19921e-05	0.478857	-1.40128	UROBE1963355_EIv1.0_0006090	0.24757	0.66501	23
allind	UROBE1963355_EIv1.0_0006100	1	2	UROBE1963355_EIv1.0_0006100.1	Low	transposable_element_gene	Unknown protein	None	None	84	252	1	2	9.44822e-05	0.416619	-1.04726	UROBE1963355_EIv1.0_0006100	0.3997	0.68555	20
allind	UROBE1963355_EIv1.0_0006110	0	7	UROBE1963355_EIv1.0_0006110.1	High	protein_coding_gene	PTH2 family peptidyl-tRNA hydrolase	IPR002833 (Peptidyl-tRNA hydrolase, PTH2), IPR023476 (Peptidyl-tRNA hydrolase II domain)	GO:0004045, GO:0005829, GO:0016020, GO:0016021, GO:0016787	84	633	0	1	0	0.451817	NA	UROBE1963355_EIv1.0_0006110	0.35022	0.81276	32
allind	UROBE1963355_EIv1.0_0006120	0	1	UROBE1963355_EIv1.0_0006120.1	Low	transposable_element_gene	Unknown protein	None	None	84	279	0	1	0	0.512545	NA	UROBE1963355_EIv1.0_0006120	0.1568	0.25495	7
allind	UROBE1963355_EIv1.0_0006130	0	1	UROBE1963355_EIv1.0_0006130.1	High	protein_coding_gene	Protein tyrosine phosphatase	IPR001763 (Rhodanese-like domain), IPR003595 (Protein-tyrosine phosphatase, catalytic), IPR029021 (Protein-tyrosine phosphatase-like)	GO:0004721, GO:0004725, GO:0006470, GO:0016311, GO:0016787, GO:0016791, GO:0035335	84	2865	2	3	9.19159e-05	0.530167	-0.543042	UROBE1963355_EIv1.0_0006130	0.12438	0.23741	10
allind	UROBE1963355_EIv1.0_0006140	0	2	UROBE1963355_EIv1.0_0006140.1	High	protein_coding_gene	Unknown protein	None	None	84	435	0	1	0	0.533333	NA	UROBE1963355_EIv1.0_0006140	0.07768	0.15475	9
allind	UROBE1963355_EIv1.0_0006150	0	1	UROBE1963355_EIv1.0_0006150.1	Low	transposable_element_gene	Unknown protein	None	None	84	405	0	1	0	0.469136	NA	UROBE1963355_EIv1.0_0006150	0.083427	0.17456	14
allind	UROBE1963355_EIv1.0_0006160	0	1	UROBE1963355_EIv1.0_0006160.1	High	protein_coding_gene	Rieske domain-containing protein	IPR016156 (FAD/NAD-linked reductase, dimerisation domain), IPR017941 (Rieske [2Fe-2S] iron-sulphur domain), IPR023753 (FAD/NAD(P)-binding domain)	None	84	1938	2	3	2.45712e-05	0.47678	-1.40128	UROBE1963355_EIv1.0_0006160	0.10195	0.17432	18
allind	UROBE1963355_EIv1.0_0006170	0	1	UROBE1963355_EIv1.0_0006170.1	High	transposable_element_gene	Reverse transcriptase Ty1/copia-type domain-containing protein	None	GO:0003676	84	312	0	1	0	0.496795	NA	UROBE1963355_EIv1.0_0006170	0.11009	0.17279	14
allind	UROBE1963355_EIv1.0_0006180	0	4	UROBE1963355_EIv1.0_0006180.1	High	transposable_element_gene	Integrase catalytic domain-containing protein	None	None	84	240	1	2	0.000290448	0.425	-0.774319	UROBE1963355_EIv1.0_0006180	0.17308	0.4277	18
allind	UROBE1963355_EIv1.0_0006190	0	2	UROBE1963355_EIv1.0_0006190.1	High	protein_coding_gene	60S ribosomal protein L20	IPR021138 (60S ribosomal protein L18a/ L20, eukaryotes), IPR023573 (Ribosomal protein 50S-L18Ae/60S-L20/60S-L18A)	GO:0003735, GO:0005840, GO:0006412	84	519	15	16	0.00316432	0.530278	-1.28201	UROBE1963355_EIv1.0_0006190	0.16628	0.55519	31
allind	UROBE1963355_EIv1.0_0006200	0	4	UROBE1963355_EIv1.0_0006200.1	High	protein_coding_gene	RanBP2-type domain-containing protein	IPR001876 (Zinc finger, RanBP2-type)	GO:0046872	84	2865	2	3	0.000159301	0.50809	0.225031	UROBE1963355_EIv1.0_0006200	0.42919	0.6817	60
allind	UROBE1963355_EIv1.0_0006210	0	1	UROBE1963355_EIv1.0_0006210.1	High	protein_coding_gene	Unknown protein	None	None	84	357	1	2	0.00125994	0.575163	1.48597	UROBE1963355_EIv1.0_0006210	0.52572	0.78593	17
allind	UROBE1963355_EIv1.0_0006220	0	1	UROBE1963355_EIv1.0_0006220.1	Low	protein_coding_gene	Unknown protein	None	None	84	465	3	4	0.00120975	0.486175	-0.115015	UROBE1963355_EIv1.0_0006220	0.54332	0.79084	18
allind	UROBE1963355_EIv1.0_0006230	0	1	UROBE1963355_EIv1.0_0006230.1	Low	transposable_element_gene	Integrase catalytic domain-containing protein	IPR012337 (Ribonuclease H-like domain), IPR013103 (Reverse transcriptase, RNA-dependent DNA polymerase)	GO:0000943, GO:0003676, GO:0015074	84	2709	3	5	0.000377294	0.506908	1.30521	UROBE1963355_EIv1.0_0006230	0.091881	0.16499	48
allind	UROBE1963355_EIv1.0_0006240	0	1	UROBE1963355_EIv1.0_0006240.1	Low	transposable_element_gene	Integrase catalytic domain-containing protein	None	GO:0000943, GO:0003676, GO:0015074	84	204	1	2	0.000757934	0.510212	-0.269379	UROBE1963355_EIv1.0_0006240	0.096106	0.16883	44
allind	UROBE1963355_EIv1.0_0006250	0	1	UROBE1963355_EIv1.0_0006250.1	High	transposable_element_gene	Integrase catalytic domain-containing protein	IPR012337 (Ribonuclease H-like domain)	GO:0000943, GO:0003676, GO:0015074	84	354	0	1	0	0.483051	NA	UROBE1963355_EIv1.0_0006250	0.11108	0.20379	46
allind	UROBE1963355_EIv1.0_0006260	0	2	UROBE1963355_EIv1.0_0006260.1	High	protein_coding_gene	FAD_binding_3 domain-containing protein	IPR002938 (FAD-binding domain), IPR023753 (FAD/NAD(P)-binding domain)	GO:0016020, GO:0016021, GO:0071949	84	1275	1	2	0.000352784	0.545621	1.48597	UROBE1963355_EIv1.0_0006260	0.22524	0.66624	17
allind	UROBE1963355_EIv1.0_0006270	0	1	UROBE1963355_EIv1.0_0006270.1	High	protein_coding_gene	Transcription factor	IPR003120 (Transcription factor Ste12)	GO:0003676, GO:0003700, GO:0005634, GO:0006355	84	2628	4	5	0.00032583	0.523243	0.144806	UROBE1963355_EIv1.0_0006270	0.04217	0.11953	66
allind	UROBE1963355_EIv1.0_0006280	0	2	UROBE1963355_EIv1.0_0006280.1	High	protein_coding_gene	SGNH_hydro domain-containing protein	None	GO:0016788	84	1545	1	2	1.54107e-05	0.486084	-1.04726	UROBE1963355_EIv1.0_0006280	0.072272	0.28903	11
allind	UROBE1963355_EIv1.0_0006290	0	2	UROBE1963355_EIv1.0_0006290.1	High	protein_coding_gene	Ubiquitin-like domain-containing protein	IPR015496 (Ubiquilin), IPR029071 (Ubiquitin-related domain)	None	84	927	0	1	0	0.514563	NA	UROBE1963355_EIv1.0_0006290	0.097797	0.29732	10
allind	UROBE1963355_EIv1.0_0006300	0	1	UROBE1963355_EIv1.0_0006300.1	Low	transposable_element_gene	DUF4219 domain-containing protein	IPR025314 (Domain of unknown function DUF4219)	None	84	270	0	1	0	0.466667	NA	UROBE1963355_EIv1.0_0006300	0.098481	0.21936	23
allind	UROBE1963355_EIv1.0_0006310	0	1	UROBE1963355_EIv1.0_0006310.1	Low	protein_coding_gene	DLH domain-containing protein	None	GO:0016787	84	594	0	1	0	0.515151	NA	UROBE1963355_EIv1.0_0006310	0.10023	0.29479	14
allind	UROBE1963355_EIv1.0_0006320	0	2	UROBE1963355_EIv1.0_0006320.1	High	protein_coding_gene	60S ribosomal protein L13	IPR001380 (Ribosomal protein L13e)	None	84	630	0	1	0	0.550794	NA	UROBE1963355_EIv1.0_0006320	0.11518	0.29051	15
allind	UROBE1963355_EIv1.0_0006330	0	1	UROBE1963355_EIv1.0_0006330.1	High	transposable_element_gene	Integrase catalytic domain-containing protein	None	GO:0003676, GO:0015074	84	462	1	2	0.000245261	0.400433	-0.515026	UROBE1963355_EIv1.0_0006330	0.07003	0.14308	12
allind	UROBE1963355_EIv1.0_0006340	0	1	UROBE1963355_EIv1.0_0006340.1	High	transposable_element_gene	Integrase catalytic domain-containing protein	IPR025314 (Domain of unknown function DUF4219)	None	84	1017	1	2	2.34115e-05	0.414958	-1.04726	UROBE1963355_EIv1.0_0006340	0.087028	0.26514	22
allind	UROBE1963355_EIv1.0_0006350	0	1	UROBE1963355_EIv1.0_0006350.1	High	transposable_element_gene	Integrase catalytic domain-containing protein	None	GO:0000943, GO:0003676, GO:0015074	84	1200	1	2	1.98413e-05	0.425823	-1.04726	UROBE1963355_EIv1.0_0006350	0.22282	0.35595	18
allind	UROBE1963355_EIv1.0_0006360	0	1	UROBE1963355_EIv1.0_0006360.1	Low	transposable_element_gene	Unknown protein	None	None	84	212	0	1	0	0.462264	NA	UROBE1963355_EIv1.0_0006360	0.076938	0.2245	13
allind	UROBE1963355_EIv1.0_0006370	0	2	UROBE1963355_EIv1.0_0006370.1	High	transposable_element_gene	Integrase catalytic domain-containing protein	None	GO:0000943, GO:0003676, GO:0015074	84	957	0	1	0	0.503657	NA	UROBE1963355_EIv1.0_0006370	0.1399	0.28608	21
allind	UROBE1963355_EIv1.0_0006380	0	1	UROBE1963355_EIv1.0_0006380.1	High	transposable_element_gene	Integrase catalytic domain-containing protein	None	GO:0000943, GO:0003676, GO:0015074	84	684	0	1	0	0.44152	NA	UROBE1963355_EIv1.0_0006380	0.1975	0.37891	17
allind	UROBE1963355_EIv1.0_0006390	0	1	UROBE1963355_EIv1.0_0006390.1	Low	predicted_gene	Unknown protein	None	None	84	191	0	1	0	0.554974	NA	UROBE1963355_EIv1.0_0006390	0.15637	0.2241	23
allind	UROBE1963355_EIv1.0_0006400	0	1	UROBE1963355_EIv1.0_0006400.1	Low	protein_coding_gene	Unknown protein	None	None	84	630	0	1	0	0.395238	NA	UROBE1963355_EIv1.0_0006400	0.14449	0.20438	23
allind	UROBE1963355_EIv1.0_0006410	0	1	UROBE1963355_EIv1.0_0006410.1	High	transposable_element_gene	Reverse transcriptase domain-containing protein	None	None	84	501	0	1	0	0.576846	NA	UROBE1963355_EIv1.0_0006410	0.058654	0.11862	50
allind	UROBE1963355_EIv1.0_0006420	0	1	UROBE1963355_EIv1.0_0006420.1	High	transposable_element_gene	Peptidase A2 domain-containing protein	None	GO:0004190, GO:0006508	84	702	4	5	0.00144289	0.567308	0.545429	UROBE1963355_EIv1.0_0006420	0.057346	0.11767	47
allind	UROBE1963355_EIv1.0_0006430	0	2	UROBE1963355_EIv1.0_0006430.1	High	protein_coding_gene	60S ribosomal protein L23	IPR000218 (Ribosomal protein L14P)	GO:0003735, GO:0005840, GO:0006412	84	414	0	1	0	0.528985	NA	UROBE1963355_EIv1.0_0006430	0.073377	0.23621	28
allind	UROBE1963355_EIv1.0_0006440	0	1	UROBE1963355_EIv1.0_0006440.1	High	transposable_element_gene	Integrase catalytic domain-containing protein	None	GO:0000943, GO:0003676, GO:0015074	84	725	0	1	0	0.464828	NA	UROBE1963355_EIv1.0_0006440	0.10597	0.29421	13
allind	UROBE1963355_EIv1.0_0006450	0	1	UROBE1963355_EIv1.0_0006450.1	High	transposable_element_gene	Integrase catalytic domain-containing protein	None	GO:0000943, GO:0003676, GO:0015074	84	690	1	2	3.45066e-05	0.442046	-1.04726	UROBE1963355_EIv1.0_0006450	0.1686	0.51759	15
allind	UROBE1963355_EIv1.0_0006460	0	2	UROBE1963355_EIv1.0_0006460.1	High	protein_coding_gene	Unknown protein	None	None	84	321	0	1	0	0.420561	NA	UROBE1963355_EIv1.0_0006460	0.0055076	0.012872	20
allind	UROBE1963355_EIv1.0_0006470	0	1	UROBE1963355_EIv1.0_0006470.1	High	protein_coding_gene	Unknown protein	None	None	84	327	0	1	0	0.571865	NA	UROBE1963355_EIv1.0_0006470	-0.0071097	-0.0039767	11
allind	UROBE1963355_EIv1.0_0006480	0	1	UROBE1963355_EIv1.0_0006480.1	High	transposable_element_gene	Unknown protein	None	None	84	210	0	1	0	0.433333	NA	UROBE1963355_EIv1.0_0006480	0.11407	0.43677	8
allind	UROBE1963355_EIv1.0_0006490	0	1	UROBE1963355_EIv1.0_0006490.1	High	transposable_element_gene	Integrase catalytic domain-containing protein	IPR001878 (Zinc finger, CCHC-type)	None	84	573	0	1	0	0.530541	NA	UROBE1963355_EIv1.0_0006490	0.27667	0.65393	10
allind	UROBE1963355_EIv1.0_0006500	0	1	UROBE1963355_EIv1.0_0006500.1	High	transposable_element_gene	Integrase catalytic domain-containing protein	IPR013103 (Reverse transcriptase, RNA-dependent DNA polymerase)	GO:0000943, GO:0003676, GO:0015074	84	1776	0	1	0	0.502252	NA	UROBE1963355_EIv1.0_0006500	0.18587	0.60146	14
allind	UROBE1963355_EIv1.0_0006510	0	1	UROBE1963355_EIv1.0_0006510.1	Low	protein_coding_gene	Eukaryotic mitochondrial regulator protein-domain-containing protein	IPR021036 (Ribosomal protein S35, mitochondrial)	None	84	318	0	1	0	0.427673	NA	UROBE1963355_EIv1.0_0006510	0.059792	0.19665	41
allind	UROBE1963355_EIv1.0_0006520	0	4	UROBE1963355_EIv1.0_0006520.1	High	protein_coding_gene	Chromo domain-containing protein	None	None	84	2049	1	2	4.48003e-05	0.52123	-0.642967	UROBE1963355_EIv1.0_0006520	0.17429	0.3098	6
allind	UROBE1963355_EIv1.0_0006530	0	1	UROBE1963355_EIv1.0_0006530.1	High	transposable_element_gene	Chromo domain-containing protein	IPR016197 (Chromo domain-like)	GO:0003676, GO:0005634	84	399	2	3	0.000289738	0.491138	-1.13079	UROBE1963355_EIv1.0_0006530	0.041677	0.12568	25
allind	UROBE1963355_EIv1.0_0006540	0	1	UROBE1963355_EIv1.0_0006540.1	High	transposable_element_gene	CCHC-type domain-containing protein	None	GO:0003676, GO:0008270	84	246	0	1	0	0.50813	NA	UROBE1963355_EIv1.0_0006540	0.034665	0.039386	40
allind	UROBE1963355_EIv1.0_0006550	0	1	UROBE1963355_EIv1.0_0006550.1	High	transposable_element_gene	Integrase catalytic domain-containing protein	None	GO:0000943, GO:0003676, GO:0015074	84	672	2	3	0.000105439	0.449369	-1.30883	UROBE1963355_EIv1.0_0006550	0.09731	0.37164	32
allind	UROBE1963355_EIv1.0_0006560	0	3	UROBE1963355_EIv1.0_0006560.1	High	protein_coding_gene	Chromo domain-containing protein	IPR016197 (Chromo domain-like)	GO:0005634	84	1776	2	3	3.98957e-05	0.524782	-1.30883	UROBE1963355_EIv1.0_0006560	0.033083	0.029104	26
allind	UROBE1963355_EIv1.0_0006570	0	1	UROBE1963355_EIv1.0_0006570.1	High	transposable_element_gene	CCHC-type domain-containing protein	None	GO:0003676, GO:0008270	84	246	0	1	0	0.487805	NA	UROBE1963355_EIv1.0_0006570	0.077506	0.1129	63
allind	UROBE1963355_EIv1.0_0006580	0	1	UROBE1963355_EIv1.0_0006580.1	Low	transposable_element_gene	Unknown protein	None	None	84	291	1	2	0.000531335	0.42984	-0.269379	UROBE1963355_EIv1.0_0006580	0.052002	0.10149	17
allind	UROBE1963355_EIv1.0_0006590	0	3	UROBE1963355_EIv1.0_0006590.1	High	protein_coding_gene	Small COPII coat GTPase SAR1	IPR006689 (Small GTPase superfamily, ARF/SAR type), IPR027417 (P-loop containing nucleoside triphosphate hydrolase)	GO:0000139, GO:0000166, GO:0000266, GO:0003400, GO:0003924, GO:0005525, GO:0005739, GO:0005783, GO:0005789, GO:0005794, GO:0006886, GO:0006888, GO:0007006, GO:0012507, GO:0015031, GO:0016020, GO:0016050, GO:0016192, GO:0016787, GO:0030127, GO:0031410, GO:0044233, GO:0061024, GO:0070863, GO:0070971	84	741	0	1	0	0.512821	NA	UROBE1963355_EIv1.0_0006590	0.095043	0.18008	23
allind	UROBE1963355_EIv1.0_0006600	0	1	UROBE1963355_EIv1.0_0006600.1	High	protein_coding_gene	ERCC4 domain-containing protein	IPR006166 (ERCC4 domain), IPR033310 (Mms4/EME1/EME2)	GO:0003677, GO:0004518, GO:0005634, GO:0006281, GO:0048476, GO:0090305	84	1656	0	1	0	0.483696	NA	UROBE1963355_EIv1.0_0006600	0.07229	0.16747	19
allind	UROBE1963355_EIv1.0_0006610	0	1	UROBE1963355_EIv1.0_0006610.1	Low	predicted_gene	Unknown protein	None	None	84	194	0	1	0	0.43299	NA	UROBE1963355_EIv1.0_0006610	0.045459	0.090216	15
allind	UROBE1963355_EIv1.0_0006620	0	1	UROBE1963355_EIv1.0_0006620.1	High	protein_coding_gene	Tryptophan synthase	IPR002028 (Tryptophan synthase, alpha chain), IPR006654 (Tryptophan synthase, beta chain), IPR013785 (Aldolase-type TIM barrel)	GO:0000162, GO:0003824, GO:0004834, GO:0006568, GO:0008652, GO:0009073, GO:0016829	84	2211	10	13	0.000615111	0.52354	-0.838681	UROBE1963355_EIv1.0_0006620	0.075789	0.14796	17
allind	UROBE1963355_EIv1.0_0006630	0	4	UROBE1963355_EIv1.0_0006630.1	Low	protein_coding_gene	Unknown protein	None	None	84	327	0	1	0	0.626911	NA	UROBE1963355_EIv1.0_0006630	0.068549	0.13387	18
allind	UROBE1963355_EIv1.0_0006640	0	3	UROBE1963355_EIv1.0_0006640.1	Low	transposable_element_gene	Integrase catalytic domain-containing protein	None	GO:0000943, GO:0003676, GO:0008270, GO:0015074	84	525	1	2	0.000132776	0.535306	-0.774319	UROBE1963355_EIv1.0_0006640	0.12925	0.23464	15
allind	UROBE1963355_EIv1.0_0006650	0	1	UROBE1963355_EIv1.0_0006650.1	High	transposable_element_gene	CCHC-type domain-containing protein	None	None	84	984	1	2	7.08409e-05	0.453216	-0.774319	UROBE1963355_EIv1.0_0006650	0.09002	0.17982	30
allind	UROBE1963355_EIv1.0_0006660	0	1	UROBE1963355_EIv1.0_0006660.1	Low	transposable_element_gene	Unknown protein	None	None	84	192	0	1	0	0.458333	NA	UROBE1963355_EIv1.0_0006660	0.083682	0.17049	31
allind	UROBE1963355_EIv1.0_0006670	0	3	UROBE1963355_EIv1.0_0006670.1	High	transposable_element_gene	Integrase catalytic domain-containing protein	None	None	84	861	0	1	0	0.472706	NA	UROBE1963355_EIv1.0_0006670	0.16193	0.38751	17
allind	UROBE1963355_EIv1.0_0006680	0	1	UROBE1963355_EIv1.0_0006680.1	Low	transposable_element_gene	Unknown protein	None	None	84	222	7	6	0.00288929	0.442031	-1.30569	UROBE1963355_EIv1.0_0006680	0.064685	0.17513	26
allind	UROBE1963355_EIv1.0_0006690	0	2	UROBE1963355_EIv1.0_0006690.1	High	protein_coding_gene	High-affinity iron permease	IPR004923 (Iron permease FTR1/Fip1/EfeU)	None	84	1275	1	2	0.000396657	0.48352	1.81862	UROBE1963355_EIv1.0_0006690	0.11844	0.20576	21
allind	UROBE1963355_EIv1.0_0006700	0	1	UROBE1963355_EIv1.0_0006700.1	High	protein_coding_gene	Unknown protein	None	None	84	1143	2	3	0.000138286	0.489001	-0.961888	UROBE1963355_EIv1.0_0006700	0.03575	0.060487	16
allind	UROBE1963355_EIv1.0_0006710	0	1	UROBE1963355_EIv1.0_0006710.1	High	protein_coding_gene	Dcp1p-Dcp2p decapping enzyme complex alpha subunit	None	None	84	303	0	1	0	0.435644	NA	UROBE1963355_EIv1.0_0006710	0.006025	-0.0047416	28
allind	UROBE1963355_EIv1.0_0006720	0	1	UROBE1963355_EIv1.0_0006720.1	High	protein_coding_gene	RFX-type winged-helix domain-containing protein	IPR011991 (Winged helix-turn-helix DNA-binding domain)	None	84	3156	2	3	2.24508e-05	0.549124	-1.30883	UROBE1963355_EIv1.0_0006720	0.037838	0.18006	31
allind	UROBE1963355_EIv1.0_0006730	0	1	UROBE1963355_EIv1.0_0006730.1	High	protein_coding_gene	3-ketoacyl-CoA thiolase	IPR002155 (Thiolase), IPR016039 (Thiolase-like)	GO:0003824, GO:0016740, GO:0016746, GO:0016747	84	1254	0	1	0	0.519139	NA	UROBE1963355_EIv1.0_0006730	0.10616	0.13844	25
allind	UROBE1963355_EIv1.0_0006740	0	1	UROBE1963355_EIv1.0_0006740.1	High	transposable_element_gene	CCHC-type domain-containing protein	IPR001878 (Zinc finger, CCHC-type)	GO:0003676, GO:0008270	84	1239	0	1	0	0.510089	NA	UROBE1963355_EIv1.0_0006740	0.058739	0.034415	9
allind	UROBE1963355_EIv1.0_0006750	0	1	UROBE1963355_EIv1.0_0006750.1	High	protein_coding_gene	Sox C-terminal domain-containing protein	None	None	84	3141	2	3	2.99556e-05	0.532011	-1.21639	UROBE1963355_EIv1.0_0006750	0.034065	0.090538	33
allind	UROBE1963355_EIv1.0_0006760	0	1	UROBE1963355_EIv1.0_0006760.1	Low	transposable_element_gene	Unknown protein	None	None	84	207	0	1	0	0.492754	NA	UROBE1963355_EIv1.0_0006760	0.014361	0.055118	25
allind	UROBE1963355_EIv1.0_0006770	0	3	UROBE1963355_EIv1.0_0006770.1	High	protein_coding_gene	ORC_WH_C domain-containing protein	IPR020795 (Origin recognition complex, subunit 3)	GO:0003677, GO:0005664, GO:0006260	84	2130	0	1	0	0.416432	NA	UROBE1963355_EIv1.0_0006770	0.025644	0.094466	41
allind	UROBE1963355_EIv1.0_0006780	0	1	UROBE1963355_EIv1.0_0006780.1	High	transposable_element_gene	Peptidase A2 domain-containing protein	IPR021109 (Aspartic peptidase domain)	GO:0004190, GO:0006508	84	1215	0	1	0	0.544033	NA	UROBE1963355_EIv1.0_0006780	0.02455	0.016007	12
allind	UROBE1963355_EIv1.0_0006790	0	1	UROBE1963355_EIv1.0_0006790.1	High	protein_coding_gene	Integrase catalytic domain-containing protein	None	GO:0000943, GO:0003676, GO:0015074	84	459	0	1	0	0.424837	NA	UROBE1963355_EIv1.0_0006790	0.019511	0.009602	8
allind	UROBE1963355_EIv1.0_0006800	0	1	UROBE1963355_EIv1.0_0006800.1	High	transposable_element_gene	Reverse transcriptase Ty1/copia-type domain-containing protein	None	None	84	348	0	1	0	0.448276	NA	UROBE1963355_EIv1.0_0006800	0.049596	0.04385	25
allind	UROBE1963355_EIv1.0_0006810	0	1	UROBE1963355_EIv1.0_0006810.1	High	transposable_element_gene	Integrase catalytic domain-containing protein	None	GO:0003676, GO:0015074	84	879	2	3	0.00010639	0.477762	-1.21867	UROBE1963355_EIv1.0_0006810	0.051349	0.02755	26
allind	UROBE1963355_EIv1.0_0006820	0	1	UROBE1963355_EIv1.0_0006820.1	High	transposable_element_gene	Integrase catalytic domain-containing protein	None	GO:0000943, GO:0003676, GO:0015074	84	312	1	2	7.63126e-05	0.435859	-1.04726	UROBE1963355_EIv1.0_0006820	0.013247	0.0043806	55
allind	UROBE1963355_EIv1.0_0006830	0	1	UROBE1963355_EIv1.0_0006830.1	High	transposable_element_gene	Integrase catalytic domain-containing protein	None	GO:0000943, GO:0003676, GO:0015074	84	897	0	1	0	0.491639	NA	UROBE1963355_EIv1.0_0006830	0.034939	0.028046	19
allind	UROBE1963355_EIv1.0_0006840	0	2	UROBE1963355_EIv1.0_0006840.1	High	protein_coding_gene	Unknown protein	None	None	84	1782	4	6	0.00058628	0.535354	0.626874	UROBE1963355_EIv1.0_0006840	0.044131	0.048625	27
allind	UROBE1963355_EIv1.0_0006850	0	1	UROBE1963355_EIv1.0_0006850.1	High	protein_coding_gene	Amino acid permease-domain-containing protein	IPR002293 (Amino acid/polyamine transporter I)	GO:0006865, GO:0016020, GO:0016021, GO:0022857, GO:0055085	84	2109	1	2	3.30523e-05	0.490754	-0.774319	UROBE1963355_EIv1.0_0006850	0.018027	0.017306	49
allind	UROBE1963355_EIv1.0_0006860	0	1	UROBE1963355_EIv1.0_0006860.1	High	transposable_element_gene	Integrase catalytic domain-containing protein	IPR012337 (Ribonuclease H-like domain)	GO:0000943, GO:0003676, GO:0015074	84	1008	0	1	0	0.435516	NA	UROBE1963355_EIv1.0_0006860	0.065494	0.065153	16
allind	UROBE1963355_EIv1.0_0006870	0	1	UROBE1963355_EIv1.0_0006870.1	High	transposable_element_gene	Integrase catalytic domain-containing protein	None	GO:0000943, GO:0003676, GO:0015074	84	981	0	1	0	0.493374	NA	UROBE1963355_EIv1.0_0006870	0.090005	0.14634	14
allind	UROBE1963355_EIv1.0_0006880	0	1	UROBE1963355_EIv1.0_0006880.1	High	transposable_element_gene	Integrase catalytic domain-containing protein	IPR012337 (Ribonuclease H-like domain), IPR013103 (Reverse transcriptase, RNA-dependent DNA polymerase)	GO:0000943, GO:0003676, GO:0015074	84	1203	3	4	0.000189334	0.42968	-1.1496	UROBE1963355_EIv1.0_0006880	0.014914	0.027697	37
allind	UROBE1963355_EIv1.0_0006890	0	3	UROBE1963355_EIv1.0_0006890.1	High	protein_coding_gene	Farnesyl pyrophosphate synthase	IPR000092 (Polyprenyl synthetase)	GO:0004161, GO:0004337, GO:0008299, GO:0016740, GO:0033384, GO:0045337	84	1092	2	3	8.56382e-05	0.447824	-1.21867	UROBE1963355_EIv1.0_0006890	0.010277	0.0076357	35
allind	UROBE1963355_EIv1.0_0006900	0	3	UROBE1963355_EIv1.0_0006900.1	High	protein_coding_gene	Fe-S_biosyn domain-containing protein	IPR000361 (FeS cluster biogenesis), IPR016092 (FeS cluster insertion protein)	GO:0005198, GO:0051536, GO:0097428	84	963	4	5	0.000504615	0.473273	-0.802453	UROBE1963355_EIv1.0_0006900	0.02703	0.028624	49
allind	UROBE1963355_EIv1.0_0006910	0	2	UROBE1963355_EIv1.0_0006910.1	High	transposable_element_gene	Integrase catalytic domain-containing protein	None	GO:0000943, GO:0003676, GO:0015074	84	942	4	5	0.000831046	0.502793	-0.043032	UROBE1963355_EIv1.0_0006910	0.081057	0.13195	33
allind	UROBE1963355_EIv1.0_0006920	0	2	UROBE1963355_EIv1.0_0006920.1	High	transposable_element_gene	Integrase catalytic domain-containing protein	None	GO:0000943, GO:0003676, GO:0015074	84	306	1	2	0.000227802	0.411881	-0.774319	UROBE1963355_EIv1.0_0006920	0.011548	0.016688	97
allind	UROBE1963355_EIv1.0_0006930	0	1	UROBE1963355_EIv1.0_0006930.1	Low	transposable_element_gene	Unknown protein	None	None	84	252	0	1	0	0.476191	NA	UROBE1963355_EIv1.0_0006930	0.134	0.32787	15
allind	UROBE1963355_EIv1.0_0006940	0	1	UROBE1963355_EIv1.0_0006940.1	Low	transposable_element_gene	Unknown protein	None	None	84	411	0	1	0	0.501216	NA	UROBE1963355_EIv1.0_0006940	0.14512	0.33031	14
allind	UROBE1963355_EIv1.0_0006950	0	1	UROBE1963355_EIv1.0_0006950.1	High	transposable_element_gene	Integrase catalytic domain-containing protein	IPR001878 (Zinc finger, CCHC-type)	GO:0003676, GO:0008270, GO:0015074	84	867	1	2	0.00030539	0.493835	0.38568	UROBE1963355_EIv1.0_0006950	0.065562	0.054667	9
allind	UROBE1963355_EIv1.0_0006960	0	4	UROBE1963355_EIv1.0_0006960.1	High	protein_coding_gene	J domain-containing protein	IPR001623 (DnaJ domain)	GO:0016020, GO:0016021	84	372	0	1	0	0.489247	NA	UROBE1963355_EIv1.0_0006960	0.13034	0.32787	41
allind	UROBE1963355_EIv1.0_0006970	0	3	UROBE1963355_EIv1.0_0006970.1	High	protein_coding_gene	Unplaced genomic scaffold K443scaffold_439, whole genome shotgun sequence	None	None	84	2265	5	8	0.000453026	0.468123	0.058198	UROBE1963355_EIv1.0_0006970	0.12095	0.3028	41
allind	UROBE1963355_EIv1.0_0006980	0	2	UROBE1963355_EIv1.0_0006980.1	High	protein_coding_gene	Peptidase A1 domain-containing protein	IPR001461 (Aspartic peptidase A1 family), IPR021109 (Aspartic peptidase domain)	GO:0004190, GO:0006508	84	1179	1	2	3.99027e-05	0.476675	-0.909084	UROBE1963355_EIv1.0_0006980	0.083493	0.16143	58
allind	UROBE1963355_EIv1.0_0006990	0	1	UROBE1963355_EIv1.0_0006990.1	High	protein_coding_gene	Unknown protein	None	None	84	984	2	2	0.000538157	0.468339	0.516055	UROBE1963355_EIv1.0_0006990	0.05695	0.10644	32
allind	UROBE1963355_EIv1.0_0007000	0	1	UROBE1963355_EIv1.0_0007000.1	Low	protein_coding_gene	Unknown protein	None	None	84	435	0	1	0	0.537931	NA	UROBE1963355_EIv1.0_0007000	0.047037	0.10645	29
allind	UROBE1963355_EIv1.0_0007010	0	1	UROBE1963355_EIv1.0_0007010.1	Low	predicted_gene	Unknown protein	None	None	84	243	0	1	0	0.489712	NA	UROBE1963355_EIv1.0_0007010	0.052855	0.15015	32
allind	UROBE1963355_EIv1.0_0007020	0	2	UROBE1963355_EIv1.0_0007020.1	High	protein_coding_gene	TruB_N domain-containing protein	IPR002501 (Pseudouridine synthase II, N-terminal), IPR014780 (tRNA pseudouridine synthase II, TruB), IPR020103 (Pseudouridine synthase, catalytic domain)	GO:0001522, GO:0003723, GO:0006396, GO:0009451, GO:0009982	84	1449	1	2	4.81072e-05	0.489328	-0.774319	UROBE1963355_EIv1.0_0007020	0.064309	0.15847	33
allind	UROBE1963355_EIv1.0_0007030	0	1	UROBE1963355_EIv1.0_0007030.1	Low	transposable_element_gene	Unknown protein	None	None	84	252	0	1	0	0.5	NA	UROBE1963355_EIv1.0_0007030	0.046387	0.11798	31
allind	UROBE1963355_EIv1.0_0007040	0	3	UROBE1963355_EIv1.0_0007040.1	High	protein_coding_gene	Exonuclease domain-containing protein	IPR012337 (Ribonuclease H-like domain)	GO:0003676	84	2319	0	1	0	0.466149	NA	UROBE1963355_EIv1.0_0007040	0.072034	0.16354	38
allind	UROBE1963355_EIv1.0_0007050	0	1	UROBE1963355_EIv1.0_0007050.1	High	transposable_element_gene	Integrase catalytic domain-containing protein	IPR012337 (Ribonuclease H-like domain)	GO:0000943, GO:0003676, GO:0015074	84	2064	0	1	0	0.439922	NA	UROBE1963355_EIv1.0_0007050	0.19179	0.58561	16
allind	UROBE1963355_EIv1.0_0007060	0	1	UROBE1963355_EIv1.0_0007060.1	High	transposable_element_gene	Integrase catalytic domain-containing protein	None	None	84	228	0	1	0	0.495614	NA	UROBE1963355_EIv1.0_0007060	0.089509	0.17362	11
allind	UROBE1963355_EIv1.0_0007070	0	1	UROBE1963355_EIv1.0_0007070.1	Low	transposable_element_gene	Integrase catalytic domain-containing protein	None	GO:0000943, GO:0003676, GO:0015074	84	492	0	1	0	0.53252	NA	UROBE1963355_EIv1.0_0007070	0.0062407	0.026317	5
allind	UROBE1963355_EIv1.0_0007080	0	1	UROBE1963355_EIv1.0_0007080.1	High	transposable_element_gene	Reverse transcriptase Ty1/copia-type domain-containing protein	IPR013103 (Reverse transcriptase, RNA-dependent DNA polymerase)	GO:0000943	84	234	0	1	0	0.487179	NA	UROBE1963355_EIv1.0_0007080	0.016301	0.04766	8
allind	UROBE1963355_EIv1.0_0007090	0	1	UROBE1963355_EIv1.0_0007090.1	High	protein_coding_gene	HATPase_c domain-containing protein	IPR001404 (Heat shock protein Hsp90 family)	GO:0005524, GO:0006457, GO:0051082	84	2874	2	3	2.46537e-05	0.455467	-1.30883	UROBE1963355_EIv1.0_0007090	0.062133	0.10732	15
allind	UROBE1963355_EIv1.0_0007100	0	1	UROBE1963355_EIv1.0_0007100.1	Low	predicted_gene	Unknown protein	None	None	84	159	0	1	0	0.522013	NA	UROBE1963355_EIv1.0_0007100	0.034117	0.0040472	8
allind	UROBE1963355_EIv1.0_0007110	1	1	UROBE1963355_EIv1.0_0007110.1	High	protein_coding_gene	Secreted protein	None	None	84	588	2	3	8.09848e-05	0.489796	-1.40128	UROBE1963355_EIv1.0_0007110	0.169	0.33985	21
allind	UROBE1963355_EIv1.0_0007120	0	1	UROBE1963355_EIv1.0_0007120.1	Low	transposable_element_gene	Unknown protein	None	None	84	327	0	1	0	0.458716	NA	UROBE1963355_EIv1.0_0007120	0.13015	0.24061	17
allind	UROBE1963355_EIv1.0_0007130	0	1	UROBE1963355_EIv1.0_0007130.1	Low	predicted_gene	Unknown protein	None	None	84	300	0	1	0	0.513333	NA	UROBE1963355_EIv1.0_0007130	0.088203	0.23159	14
allind	UROBE1963355_EIv1.0_0007140	0	1	UROBE1963355_EIv1.0_0007140.1	High	protein_coding_gene	Unknown protein	None	None	84	681	1	2	0.000363948	0.562618	0.285033	UROBE1963355_EIv1.0_0007140	0.10489	0.22394	19
allind	UROBE1963355_EIv1.0_0007150	0	1	UROBE1963355_EIv1.0_0007150.1	Low	transposable_element_gene	Unknown protein	None	None	84	246	0	1	0	0.325203	NA	UROBE1963355_EIv1.0_0007150	0.12645	0.26157	18
allind	UROBE1963355_EIv1.0_0007160	0	1	UROBE1963355_EIv1.0_0007160.1	High	transposable_element_gene	Integrase catalytic domain-containing protein	IPR012337 (Ribonuclease H-like domain), IPR013103 (Reverse transcriptase, RNA-dependent DNA polymerase)	GO:0003676, GO:0015074	84	1878	0	1	0	0.446219	NA	UROBE1963355_EIv1.0_0007160	0.016463	0.015346	75
allind	UROBE1963355_EIv1.0_0007170	0	2	UROBE1963355_EIv1.0_0007170.1	High	protein_coding_gene	RING-type domain-containing protein	IPR013083 (Zinc finger, RING/FYVE/PHD-type)	None	84	918	1	2	7.5934e-05	0.48471	-0.774319	UROBE1963355_EIv1.0_0007170	0.13203	0.1758	10
allind	UROBE1963355_EIv1.0_0007180	0	1	UROBE1963355_EIv1.0_0007180.1	Low	predicted_gene	Unknown protein	None	None	84	423	0	1	0	0.460993	NA	UROBE1963355_EIv1.0_0007180	0.12385	0.33081	12
allind	UROBE1963355_EIv1.0_0007190	0	1	UROBE1963355_EIv1.0_0007190.1	High	protein_coding_gene	Peptidyl-prolyl cis-trans isomerase	IPR000297 (Peptidyl-prolyl cis-trans isomerase, PpiC-type)	None	84	363	0	1	0	0.509642	NA	UROBE1963355_EIv1.0_0007190	0.12385	0.33081	12
allind	UROBE1963355_EIv1.0_0007200	0	1	UROBE1963355_EIv1.0_0007200.1	Low	protein_coding_gene	Unknown protein	None	None	84	303	0	1	0	0.475247	NA	UROBE1963355_EIv1.0_0007200	0.21574	0.45757	7
allind	UROBE1963355_EIv1.0_0007210	0	2	UROBE1963355_EIv1.0_0007210.1	High	protein_coding_gene	Unknown protein	None	None	84	1332	0	1	0	0.471471	NA	UROBE1963355_EIv1.0_0007210	0.20069	0.44815	8
allind	UROBE1963355_EIv1.0_0007220	0	1	UROBE1963355_EIv1.0_0007220.1	High	protein_coding_gene	Nuclear pore complex protein Nup160	None	None	84	4818	1	2	9.76449e-06	0.518892	-0.909084	UROBE1963355_EIv1.0_0007220	0.39604	0.53197	3
allind	UROBE1963355_EIv1.0_0007230	0	1	UROBE1963355_EIv1.0_0007230.1	High	transposable_element_gene	Integrase catalytic domain-containing protein	IPR012337 (Ribonuclease H-like domain)	GO:0003676, GO:0015074	84	1164	0	1	0	0.566151	NA	UROBE1963355_EIv1.0_0007230	0.11362	0.38207	16
allind	UROBE1963355_EIv1.0_0007240	0	1	UROBE1963355_EIv1.0_0007240.1	High	transposable_element_gene	Reverse transcriptase domain-containing protein	None	None	84	366	0	1	0	0.510929	NA	UROBE1963355_EIv1.0_0007240	0.027634	0.014112	34
allind	UROBE1963355_EIv1.0_0007250	1	1	UROBE1963355_EIv1.0_0007250.1	High	transposable_element_gene	Reverse transcriptase domain-containing protein	None	None	84	420	1	2	5.66893e-05	0.483305	-1.04726	UROBE1963355_EIv1.0_0007250	0.028214	0.014316	32
allind	UROBE1963355_EIv1.0_0007260	0	4	UROBE1963355_EIv1.0_0007260.1	High	protein_coding_gene	Beta-flanking protein, putative	None	None	84	678	0	1	0	0.477876	NA	UROBE1963355_EIv1.0_0007260	0.021042	0.0094125	44
allind	UROBE1963355_EIv1.0_0007270	0	1	UROBE1963355_EIv1.0_0007270.1	Low	transposable_element_gene	Unknown protein	None	None	84	249	0	1	0	0.405622	NA	UROBE1963355_EIv1.0_0007270	0.039394	0.044251	46
allind	UROBE1963355_EIv1.0_0007280	0	1	UROBE1963355_EIv1.0_0007280.1	Low	transposable_element_gene	Unknown protein	None	None	84	237	0	1	0	0.531646	NA	UROBE1963355_EIv1.0_0007280	0.038183	0.044155	46
allind	UROBE1963355_EIv1.0_0007290	0	1	UROBE1963355_EIv1.0_0007290.1	Low	transposable_element_gene	Unknown protein	None	None	84	234	0	1	0	0.452991	NA	UROBE1963355_EIv1.0_0007290	0.043808	0.056614	31
allind	UROBE1963355_EIv1.0_0007300	0	1	UROBE1963355_EIv1.0_0007300.1	High	transposable_element_gene	Integrase catalytic domain-containing protein	IPR013103 (Reverse transcriptase, RNA-dependent DNA polymerase)	GO:0000943, GO:0003676, GO:0015074	84	1425	0	1	0	0.485614	NA	UROBE1963355_EIv1.0_0007300	0.0577	0.083994	31
allind	UROBE1963355_EIv1.0_0007310	0	2	UROBE1963355_EIv1.0_0007310.1	High	protein_coding_gene	Unplaced genomic scaffold SPHSTscaffold_115, whole genome shotgun sequence	None	None	84	639	0	1	0	0.488263	NA	UROBE1963355_EIv1.0_0007310	0.12231	0.34531	14
allind	UROBE1963355_EIv1.0_0007320	0	2	UROBE1963355_EIv1.0_0007320.1	High	protein_coding_gene	PRT_C domain-containing protein	None	GO:0016020, GO:0016021	84	2418	0	1	0	0.476013	NA	UROBE1963355_EIv1.0_0007320	0.039677	0.07495	52
allind	UROBE1963355_EIv1.0_0007330	0	1	UROBE1963355_EIv1.0_0007330.1	High	transposable_element_gene	Integrase catalytic domain-containing protein	None	GO:0000943, GO:0003676, GO:0015074	84	267	4	6	0.00200051	0.423934	-0.679185	UROBE1963355_EIv1.0_0007330	0.016028	0.025118	113
allind	UROBE1963355_EIv1.0_0007340	0	3	UROBE1963355_EIv1.0_0007340.1	High	transposable_element_gene	Integrase catalytic domain-containing protein	IPR012337 (Ribonuclease H-like domain)	GO:0000943, GO:0003676, GO:0015074	84	930	1	2	2.56016e-05	0.473106	-1.04726	UROBE1963355_EIv1.0_0007340	0.087279	0.33843	20
allind	UROBE1963355_EIv1.0_0007350	0	2	UROBE1963355_EIv1.0_0007350.1	High	protein_coding_gene	Enoyl-CoA hydratase	IPR001753 (Crotonase superfamily), IPR029045 (ClpP/crotonase-like domain)	GO:0003824	84	870	1	2	0.000130242	0.469034	-0.515026	UROBE1963355_EIv1.0_0007350	0.14247	0.48499	20
allind	UROBE1963355_EIv1.0_0007360	0	1	UROBE1963355_EIv1.0_0007360.1	Low	transposable_element_gene	Unknown protein	None	None	84	153	0	1	0	0.398693	NA	UROBE1963355_EIv1.0_0007360	0.13897	0.4289	24
allind	UROBE1963355_EIv1.0_0007370	0	1	UROBE1963355_EIv1.0_0007370.1	High	transposable_element_gene	DUF4219 domain-containing protein	None	None	84	348	1	2	0.00109057	0.456896	1.06803	UROBE1963355_EIv1.0_0007370	0.12483	0.616	25
allind	UROBE1963355_EIv1.0_0007380	0	5	UROBE1963355_EIv1.0_0007380.1	High	transposable_element_gene	Integrase catalytic domain-containing protein	None	None	84	606	1	2	0.000728515	0.425743	1.4365	UROBE1963355_EIv1.0_0007380	0.062378	0.1955	28
allind	UROBE1963355_EIv1.0_0007390	0	1	UROBE1963355_EIv1.0_0007390.1	High	transposable_element_gene	CCHC-type domain-containing protein	None	GO:0000943, GO:0003676, GO:0008270	84	681	0	1	0	0.446402	NA	UROBE1963355_EIv1.0_0007390	0.085027	0.28283	24
allind	UROBE1963355_EIv1.0_0007400	0	2	UROBE1963355_EIv1.0_0007400.1	Low	protein_coding_gene	Unknown protein	None	None	84	303	0	1	0	0.495049	NA	UROBE1963355_EIv1.0_0007400	0.068363	0.12026	13
allind	UROBE1963355_EIv1.0_0007410	0	1	UROBE1963355_EIv1.0_0007410.1	High	protein_coding_gene	Trehalose 6-phosphate phosphatase	IPR003337 (Trehalose-phosphatase), IPR023214 (HAD-like domain)	GO:0003824, GO:0004805, GO:0005992, GO:0016311, GO:0016787	84	945	1	2	0.000119905	0.462371	-0.515026	UROBE1963355_EIv1.0_0007410	0.061997	0.11984	13
allind	UROBE1963355_EIv1.0_0007420	0	1	UROBE1963355_EIv1.0_0007420.1	High	protein_coding_gene	Glycosyltransferase family 25 protein	IPR002654 (Glycosyl transferase, family 25)	None	84	1083	0	1	0	0.54109	NA	UROBE1963355_EIv1.0_0007420	0.044665	0.048521	17
allind	UROBE1963355_EIv1.0_0007430	0	2	UROBE1963355_EIv1.0_0007430.1	High	protein_coding_gene	Urease accessory protein ureG-like	IPR004400 (Urease accessory protein UreG), IPR027417 (P-loop containing nucleoside triphosphate hydrolase)	None	84	816	0	1	0	0.48652	NA	UROBE1963355_EIv1.0_0007430	0.026082	0.030323	114
allind	UROBE1963355_EIv1.0_0007440	0	2	UROBE1963355_EIv1.0_0007440.1	High	protein_coding_gene	Heat shock protein 90	IPR001404 (Heat shock protein Hsp90 family)	GO:0005524, GO:0006457, GO:0051082	84	2127	97	44	0.00595032	0.506313	-1.16238	UROBE1963355_EIv1.0_0007440	0.023664	0.02679	123
allind	UROBE1963355_EIv1.0_0007450	0	1	UROBE1963355_EIv1.0_0007450.1	Low	predicted_gene	Unknown protein	None	None	84	336	0	1	0	0.532738	NA	UROBE1963355_EIv1.0_0007450	0.025567	0.043076	118
allind	UROBE1963355_EIv1.0_0007460	0	1	UROBE1963355_EIv1.0_0007460.1	High	protein_coding_gene	Unknown protein	None	None	84	432	0	1	0	0.5	NA	UROBE1963355_EIv1.0_0007460	0.078551	0.32131	14
allind	UROBE1963355_EIv1.0_0007470	0	1	UROBE1963355_EIv1.0_0007470.1	Low	predicted_gene	Unknown protein	None	None	84	288	0	1	0	0.444444	NA	UROBE1963355_EIv1.0_0007470	0.069468	0.29925	16
allind	UROBE1963355_EIv1.0_0007480	0	1	UROBE1963355_EIv1.0_0007480.1	Low	transposable_element_gene	Unknown protein	None	None	84	252	0	1	0	0.527778	NA	UROBE1963355_EIv1.0_0007480	0.075777	0.11415	13
allind	UROBE1963355_EIv1.0_0007490	0	1	UROBE1963355_EIv1.0_0007490.1	High	protein_coding_gene	Protein phosphatase methylesterase 1	IPR016812 (Protein phosphatase methylesterase, eukaryotic), IPR029058 (Alpha/Beta hydrolase fold)	None	84	1125	0	1	0	0.539555	NA	UROBE1963355_EIv1.0_0007490	-0.013216	-0.015007	21
allind	UROBE1963355_EIv1.0_0007500	0	1	UROBE1963355_EIv1.0_0007500.1	High	protein_coding_gene	Gamma-glutamyltranspeptidase	IPR000101 (Gamma-glutamyltranspeptidase), IPR029055 (Nucleophile aminohydrolases, N-terminal)	None	84	1920	0	1	0	0.475	NA	UROBE1963355_EIv1.0_0007500	-0.0048149	-0.011555	25
allind	UROBE1963355_EIv1.0_0007510	0	1	UROBE1963355_EIv1.0_0007510.1	High	transposable_element_gene	DUF4219 domain-containing protein	None	None	84	234	1	2	0.000660763	0.469729	-0.269379	UROBE1963355_EIv1.0_0007510	0.13876	0.22494	19
allind	UROBE1963355_EIv1.0_0007520	0	1	UROBE1963355_EIv1.0_0007520.1	High	protein_coding_gene	NAM-associated domain-containing protein	None	None	84	1212	1	2	7.57391e-05	0.482713	-0.642967	UROBE1963355_EIv1.0_0007520	0.06125	0.061481	33
allind	UROBE1963355_EIv1.0_0007530	0	1	UROBE1963355_EIv1.0_0007530.1	Low	predicted_gene	Unknown protein	None	None	84	216	1	2	0.00042498	0.537258	-0.642967	UROBE1963355_EIv1.0_0007530	0.050998	0.049107	28
allind	UROBE1963355_EIv1.0_0007540	0	1	UROBE1963355_EIv1.0_0007540.1	High	transposable_element_gene	Integrase catalytic domain-containing protein	IPR012337 (Ribonuclease H-like domain)	GO:0000943, GO:0003676, GO:0015074	84	1653	1	2	2.84606e-05	0.45434	-0.909084	UROBE1963355_EIv1.0_0007540	0.14492	0.15888	17
allind	UROBE1963355_EIv1.0_0007550	0	1	UROBE1963355_EIv1.0_0007550.1	High	transposable_element_gene	Integrase catalytic domain-containing protein	None	GO:0000943, GO:0003676, GO:0015074	84	411	0	1	0	0.493917	NA	UROBE1963355_EIv1.0_0007550	0.095794	0.11469	16
allind	UROBE1963355_EIv1.0_0007560	0	1	UROBE1963355_EIv1.0_0007560.1	High	transposable_element_gene	Unknown protein	None	None	84	486	1	2	0.000701218	0.489712	0.837738	UROBE1963355_EIv1.0_0007560	0.050701	0.09279	35
allind	UROBE1963355_EIv1.0_0007570	0	3	UROBE1963355_EIv1.0_0007570.1	High	protein_coding_gene	HPP family protein	IPR007065 (HPP)	GO:0016020, GO:0016021	84	1119	0	1	0	0.487936	NA	UROBE1963355_EIv1.0_0007570	0.041993	0.084882	45
allind	UROBE1963355_EIv1.0_0007580	0	1	UROBE1963355_EIv1.0_0007580.1	Low	transposable_element_gene	Unknown protein	None	None	84	258	2	3	0.00234715	0.378138	0.818491	UROBE1963355_EIv1.0_0007580	0.093138	0.14932	40
allind	UROBE1963355_EIv1.0_0007590	0	2	UROBE1963355_EIv1.0_0007590.1	Low	transposable_element_gene	Unknown protein	None	None	84	294	0	1	0	0.687075	NA	UROBE1963355_EIv1.0_0007590	0.11017	0.20299	17
allind	UROBE1963355_EIv1.0_0007600	0	1	UROBE1963355_EIv1.0_0007600.1	Low	transposable_element_gene	Unknown protein	None	None	84	231	0	1	0	0.584416	NA	UROBE1963355_EIv1.0_0007600	0.076439	0.15035	14
allind	UROBE1963355_EIv1.0_0007610	0	1	UROBE1963355_EIv1.0_0007610.1	High	protein_coding_gene	Plasma membrane fusion protein PRM1	IPR026777 (Plasma membrane fusion protein PRM1)	GO:0016020, GO:0016021, GO:0032220, GO:0043332	84	2244	1	2	1.06103e-05	0.487071	-1.04726	UROBE1963355_EIv1.0_0007610	0.29266	0.8089	17
allind	UROBE1963355_EIv1.0_0007620	0	1	UROBE1963355_EIv1.0_0007620.1	High	transposable_element_gene	Integrase catalytic domain-containing protein	None	GO:0000943, GO:0003676, GO:0015074	84	342	0	1	0	0.429825	NA	UROBE1963355_EIv1.0_0007620	0.19634	0.68547	16
allind	UROBE1963355_EIv1.0_0007630	0	1	UROBE1963355_EIv1.0_0007630.1	High	transposable_element_gene	Integrase catalytic domain-containing protein	None	GO:0000943, GO:0003676, GO:0015074	84	1260	6	6	0.000202852	0.454819	-1.8199	UROBE1963355_EIv1.0_0007630	0.17164	0.56895	29
allind	UROBE1963355_EIv1.0_0007640	0	1	UROBE1963355_EIv1.0_0007640.1	High	transposable_element_gene	Integrase catalytic domain-containing protein	None	GO:0003676, GO:0015074	84	276	0	1	0	0.365942	NA	UROBE1963355_EIv1.0_0007640	0.26323	0.57838	23
allind	UROBE1963355_EIv1.0_0007650	0	1	UROBE1963355_EIv1.0_0007650.1	High	protein_coding_gene	BUB protein kinase	IPR011009 (Protein kinase-like domain), IPR015661 (Mitotic spindle checkpoint protein Bub1/Mad3)	GO:0004672, GO:0005524, GO:0006468, GO:0007094, GO:0016301, GO:0016310	84	3726	1	2	6.3901e-06	0.460819	-1.04726	UROBE1963355_EIv1.0_0007650	0.11921	0.46025	31
allind	UROBE1963355_EIv1.0_0007660	0	1	UROBE1963355_EIv1.0_0007660.1	Low	predicted_gene	Unknown protein	None	None	84	267	0	1	0	0.393258	NA	UROBE1963355_EIv1.0_0007660	0.079254	0.33289	14
allind	UROBE1963355_EIv1.0_0007670	0	1	UROBE1963355_EIv1.0_0007670.1	Low	transposable_element_gene	Unknown protein	None	None	84	402	14	15	0.00593918	0.59358	-0.411589	UROBE1963355_EIv1.0_0007670	0.071652	0.23729	42
allind	UROBE1963355_EIv1.0_0007680	0	1	UROBE1963355_EIv1.0_0007680.1	Low	transposable_element_gene	Unknown protein	None	None	84	244	1	2	9.758e-05	0.508148	-1.04726	UROBE1963355_EIv1.0_0007680	0.12519	0.20863	17
allind	UROBE1963355_EIv1.0_0007690	0	1	UROBE1963355_EIv1.0_0007690.1	Low	transposable_element_gene	Unknown protein	None	None	84	240	1	2	0.000959792	0.486954	0.180974	UROBE1963355_EIv1.0_0007690	0.11709	0.20146	22
allind	UROBE1963355_EIv1.0_0007700	0	1	UROBE1963355_EIv1.0_0007700.1	Low	predicted_gene	Unknown protein	None	None	84	207	0	1	0	0.478261	NA	UROBE1963355_EIv1.0_0007700	0.11726	0.20417	20
allind	UROBE1963355_EIv1.0_0007710	0	2	UROBE1963355_EIv1.0_0007710.1	Low	predicted_gene	Unknown protein	None	None	84	237	0	1	0	0.455696	NA	UROBE1963355_EIv1.0_0007710	0.13922	0.24787	20
allind	UROBE1963355_EIv1.0_0007720	0	1	UROBE1963355_EIv1.0_0007720.1	High	protein_coding_gene	MFS domain-containing protein	IPR020846 (Major facilitator superfamily domain)	GO:0016020, GO:0016021, GO:0055085	84	1413	0	1	0	0.457891	NA	UROBE1963355_EIv1.0_0007720	0.12028	0.23864	19
allind	UROBE1963355_EIv1.0_0007730	0	2	UROBE1963355_EIv1.0_0007730.1	High	protein_coding_gene	SPX domain-containing protein	IPR001898 (Sodium/sulphate symporter), IPR004331 (SPX domain)	GO:0005215, GO:0005315, GO:0006797, GO:0006814, GO:0006817, GO:0016020, GO:0016021, GO:0055085	84	3081	0	1	0	0.444985	NA	UROBE1963355_EIv1.0_0007730	0.20693	0.28038	10
allind	UROBE1963355_EIv1.0_0007740	0	1	UROBE1963355_EIv1.0_0007740.1	High	protein_coding_gene	DH domain-containing protein	IPR000219 (Dbl homology (DH) domain)	GO:0005089, GO:0035023	84	4668	2	3	5.81958e-05	0.513468	-0.509945	UROBE1963355_EIv1.0_0007740	0.21536	0.41208	5
allind	UROBE1963355_EIv1.0_0007750	0	2	UROBE1963355_EIv1.0_0007750.1	High	protein_coding_gene	Leucine carboxyl methyltransferase 1	IPR007213 (Methyltransferase Ppm1/Ppm2/Tcmp), IPR029063 (S-adenosyl-L-methionine-dependent methyltransferase)	GO:0006481, GO:0008168, GO:0016740, GO:0018423, GO:0032259	84	1161	0	1	0	0.572782	NA	UROBE1963355_EIv1.0_0007750	0.035358	0.052607	20
allind	UROBE1963355_EIv1.0_0007760	0	1	UROBE1963355_EIv1.0_0007760.1	High	protein_coding_gene	zf-met2 domain-containing protein	IPR026939 (At2g23090-like)	None	84	222	0	1	0	0.563063	NA	UROBE1963355_EIv1.0_0007760	0.038974	0.055286	21
allind	UROBE1963355_EIv1.0_0007770	0	1	UROBE1963355_EIv1.0_0007770.1	High	protein_coding_gene	PKS_AT domain-containing protein	IPR016035 (Acyl transferase/acyl hydrolase/lysophospholipase)	GO:0016740	84	1416	0	1	0	0.577684	NA	UROBE1963355_EIv1.0_0007770	0.055649	0.066415	27
allind	UROBE1963355_EIv1.0_0007780	0	4	UROBE1963355_EIv1.0_0007780.1	High	protein_coding_gene	Unknown protein	None	None	84	2277	0	1	0	0.517347	NA	UROBE1963355_EIv1.0_0007780	0.084436	0.091703	7
allind	UROBE1963355_EIv1.0_0007790	0	2	UROBE1963355_EIv1.0_0007790.1	High	protein_coding_gene	Guanyl-nucleotide exchange factor	IPR000904 (Sec7 domain), IPR011993 (PH domain-like), IPR023394 (Sec7 domain, alpha orthogonal bundle)	GO:0005086, GO:0032012	84	5898	3	6	0.000241775	0.516024	2.55345	UROBE1963355_EIv1.0_0007790	0.1965	0.19289	12
allind	UROBE1963355_EIv1.0_0007800	0	1	UROBE1963355_EIv1.0_0007800.1	High	transposable_element_gene	Integrase catalytic domain-containing protein	None	GO:0000943, GO:0003676, GO:0015074	84	843	0	1	0	0.448399	NA	UROBE1963355_EIv1.0_0007800	0.13646	0.26442	19
allind	UROBE1963355_EIv1.0_0007810	0	1	UROBE1963355_EIv1.0_0007810.1	High	transposable_element_gene	Unknown protein	None	None	84	300	1	2	0.000581373	0.556984	-0.151673	UROBE1963355_EIv1.0_0007810	0.035388	0.050231	15
allind	UROBE1963355_EIv1.0_0007820	0	2	UROBE1963355_EIv1.0_0007820.1	High	protein_coding_gene	Calpain catalytic domain-containing protein	IPR001300 (Peptidase C2, calpain, catalytic domain), IPR007330 (MIT), IPR022682 (Peptidase C2, calpain, large subunit, domain III)	GO:0004198, GO:0006508, GO:0008233, GO:0008234, GO:0016787	84	2598	2	3	2.72728e-05	0.484608	-1.30883	UROBE1963355_EIv1.0_0007820	0.12053	0.24667	18
allind	UROBE1963355_EIv1.0_0007830	0	1	UROBE1963355_EIv1.0_0007830.1	High	transposable_element_gene	Reverse transcriptase Ty1/copia-type domain-containing protein	None	None	84	333	0	1	0	0.414414	NA	UROBE1963355_EIv1.0_0007830	0.025552	0.037261	31
allind	UROBE1963355_EIv1.0_0007840	0	1	UROBE1963355_EIv1.0_0007840.1	High	transposable_element_gene	Integrase catalytic domain-containing protein	None	GO:0003676, GO:0015074	84	201	0	1	0	0.432836	NA	UROBE1963355_EIv1.0_0007840	0.024663	0.037128	31
allind	UROBE1963355_EIv1.0_0007850	0	1	UROBE1963355_EIv1.0_0007850.1	High	transposable_element_gene	Integrase catalytic domain-containing protein	IPR012337 (Ribonuclease H-like domain)	GO:0000943, GO:0003676, GO:0015074	84	681	0	1	0	0.425844	NA	UROBE1963355_EIv1.0_0007850	0.024663	0.037128	31
allind	UROBE1963355_EIv1.0_0007860	0	1	UROBE1963355_EIv1.0_0007860.1	High	transposable_element_gene	Integrase catalytic domain-containing protein	None	GO:0000943, GO:0003676, GO:0015074	84	507	0	1	0	0.426036	NA	UROBE1963355_EIv1.0_0007860	0.048546	0.091478	28
allind	UROBE1963355_EIv1.0_0007870	0	5	UROBE1963355_EIv1.0_0007870.1	High	protein_coding_gene	DUF2012 domain-containing protein	IPR019008 (Domain of unknown function DUF2012)	GO:0016020, GO:0016021	84	768	0	1	0	0.485677	NA	UROBE1963355_EIv1.0_0007870	0.048836	0.11653	14
allind	UROBE1963355_EIv1.0_0007880	0	1	UROBE1963355_EIv1.0_0007880.1	Low	transposable_element_gene	Unknown protein	None	None	84	318	0	1	0	0.45912	NA	UROBE1963355_EIv1.0_0007880	0.024264	0.16341	7
allind	UROBE1963355_EIv1.0_0007890	0	1	UROBE1963355_EIv1.0_0007890.1	High	transposable_element_gene	Integrase catalytic domain-containing protein	None	GO:0000943, GO:0003676, GO:0015074	84	678	0	1	0	0.513274	NA	UROBE1963355_EIv1.0_0007890	0.081478	0.17981	12
allind	UROBE1963355_EIv1.0_0007900	0	2	UROBE1963355_EIv1.0_0007900.1	High	protein_coding_gene	Lipase_GDSL domain-containing protein	IPR013830 (SGNH hydrolase-type esterase domain)	GO:0016788	84	939	0	1	0	0.520767	NA	UROBE1963355_EIv1.0_0007900	0.11196	0.36183	14
allind	UROBE1963355_EIv1.0_0007910	0	1	UROBE1963355_EIv1.0_0007910.1	Low	predicted_gene	Unknown protein	None	None	84	216	0	1	0	0.527778	NA	UROBE1963355_EIv1.0_0007910	0.13632	0.37473	11
allind	UROBE1963355_EIv1.0_0007920	0	1	UROBE1963355_EIv1.0_0007920.1	High	protein_coding_gene	Unknown protein	None	None	84	774	0	1	0	0.45478	NA	UROBE1963355_EIv1.0_0007920	0.13203	0.37109	12
allind	UROBE1963355_EIv1.0_0007930	0	1	UROBE1963355_EIv1.0_0007930.1	Low	transposable_element_gene	Unknown protein	None	None	84	252	0	1	0	0.365079	NA	UROBE1963355_EIv1.0_0007930	0.082317	0.13041	24
allind	UROBE1963355_EIv1.0_0007940	0	3	UROBE1963355_EIv1.0_0007940.1	High	protein_coding_gene	Post-SET domain-containing protein	IPR001214 (SET domain)	None	84	543	1	2	0.000760738	0.40463	1.26762	UROBE1963355_EIv1.0_0007940	0.079561	0.1288	24
allind	UROBE1963355_EIv1.0_0007950	0	3	UROBE1963355_EIv1.0_0007950.1	High	protein_coding_gene	Unplaced genomic scaffold K443scaffold_328, whole genome shotgun sequence	IPR012340 (Nucleic acid-binding, OB-fold)	None	84	1038	0	1	0	0.519268	NA	UROBE1963355_EIv1.0_0007950	0.042218	0.10971	17
allind	UROBE1963355_EIv1.0_0007960	0	4	UROBE1963355_EIv1.0_0007960.1	High	protein_coding_gene	Methylenetetrahydrofolate reductase	IPR003171 (Methylenetetrahydrofolate reductase), IPR029041 (FAD-linked oxidoreductase-like)	GO:0004489, GO:0006555, GO:0016491, GO:0035999, GO:0055114	84	1923	4	4	0.000144102	0.487247	-1.33662	UROBE1963355_EIv1.0_0007960	0.043721	0.11076	17
allind	UROBE1963355_EIv1.0_0007970	0	6	UROBE1963355_EIv1.0_0007970.1	High	protein_coding_gene	3Beta_HSD domain-containing protein	IPR016040 (NAD(P)-binding domain)	GO:0000252, GO:0003854, GO:0005783, GO:0005789, GO:0006694, GO:0006696, GO:0016491, GO:0016616, GO:0055114	84	1440	2	4	0.000355987	0.558342	0.44872	UROBE1963355_EIv1.0_0007970	0.14642	0.24648	28
allind	UROBE1963355_EIv1.0_0007980	0	1	UROBE1963355_EIv1.0_0007980.1	Low	protein_coding_gene	Myb_DNA-bind_3 domain-containing protein	None	None	84	305	0	1	0	0.416393	NA	UROBE1963355_EIv1.0_0007980	0.042126	0.038989	12
allind	UROBE1963355_EIv1.0_0007990	0	2	UROBE1963355_EIv1.0_0007990.1	Low	protein_coding_gene	Unknown protein	None	None	84	237	0	1	0	0.472574	NA	UROBE1963355_EIv1.0_0007990	0.013654	0.0073235	11
allind	UROBE1963355_EIv1.0_0008000	0	1	UROBE1963355_EIv1.0_0008000.1	Low	protein_coding_gene	Unknown protein	None	None	84	345	0	1	0	0.44058	NA	UROBE1963355_EIv1.0_0008000	0.012818	0.007277	24
allind	UROBE1963355_EIv1.0_0008010	0	1	UROBE1963355_EIv1.0_0008010.1	High	protein_coding_gene	Unknown protein	None	None	84	1908	0	1	0	0.476415	NA	UROBE1963355_EIv1.0_0008010	0.019257	0.028006	28
allind	UROBE1963355_EIv1.0_0008020	0	1	UROBE1963355_EIv1.0_0008020.1	Low	predicted_gene	Unknown protein	None	None	84	288	0	1	0	0.489583	NA	UROBE1963355_EIv1.0_0008020	0.019485	0.033171	24
allind	UROBE1963355_EIv1.0_0008030	0	1	UROBE1963355_EIv1.0_0008030.1	High	transposable_element_gene	Integrase catalytic domain-containing protein	IPR012337 (Ribonuclease H-like domain)	None	84	846	0	1	0	0.549645	NA	UROBE1963355_EIv1.0_0008030	0.093412	0.15025	11
allind	UROBE1963355_EIv1.0_0008040	0	1	UROBE1963355_EIv1.0_0008040.1	High	protein_coding_gene	CCHC-type domain-containing protein	IPR001878 (Zinc finger, CCHC-type)	GO:0003676, GO:0008270	84	1278	0	1	0	0.51252	NA	UROBE1963355_EIv1.0_0008040	0.084062	0.085035	5
allind	UROBE1963355_EIv1.0_0008050	0	1	UROBE1963355_EIv1.0_0008050.1	High	transposable_element_gene	Reverse transcriptase domain-containing protein	IPR000477 (Reverse transcriptase domain)	None	84	1338	0	1	0	0.484305	NA	UROBE1963355_EIv1.0_0008050	0.072688	0.067444	6
allind	UROBE1963355_EIv1.0_0008060	0	1	UROBE1963355_EIv1.0_0008060.1	Low	transposable_element_gene	Unknown protein	None	None	84	162	0	1	0	0.351852	NA	UROBE1963355_EIv1.0_0008060	0.077731	0.15822	12
allind	UROBE1963355_EIv1.0_0008070	0	1	UROBE1963355_EIv1.0_0008070.1	Low	protein_coding_gene	Unknown protein	None	None	84	411	0	1	0	0.56691	NA	UROBE1963355_EIv1.0_0008070	0.11081	0.30613	7
allind	UROBE1963355_EIv1.0_0008080	0	3	UROBE1963355_EIv1.0_0008080.1	High	protein_coding_gene	Protein-histidine kinase	IPR000014 (PAS domain), IPR000700 (PAS-associated, C-terminal), IPR003594 (Histidine kinase-like ATPase, C-terminal domain), IPR003661 (Signal transduction histidine kinase, dimerisation/phosphoacceptor domain), IPR004358 (Signal transduction histidine kinase-related protein, C-terminal), IPR005467 (Histidine kinase domain), IPR011006 (CheY-like superfamily)	GO:0000155, GO:0000160, GO:0007165, GO:0016301, GO:0016310, GO:0016772, GO:0023014	84	6666	1	2	7.0575e-06	0.494003	-0.909084	UROBE1963355_EIv1.0_0008080	0.058453	0.11479	31
allind	UROBE1963355_EIv1.0_0008090	0	1	UROBE1963355_EIv1.0_0008090.1	Low	transposable_element_gene	Unknown protein	None	None	84	240	0	1	0	0.325	NA	UROBE1963355_EIv1.0_0008090	0.079954	0.17644	19
allind	UROBE1963355_EIv1.0_0008100	0	1	UROBE1963355_EIv1.0_0008100.1	Low	transposable_element_gene	Integrase catalytic domain-containing protein	IPR012337 (Ribonuclease H-like domain)	GO:0000943, GO:0003676, GO:0015074	84	747	0	1	0	0.476573	NA	UROBE1963355_EIv1.0_0008100	0.087713	0.18674	13
allind	UROBE1963355_EIv1.0_0008110	0	3	UROBE1963355_EIv1.0_0008110.1	High	protein_coding_gene	DNA replication complex GINS protein SLD5	IPR008591 (GINS complex subunit Sld5), IPR021151 (GINS subunit, domain A), IPR031633 (DNA replication complex GINS protein SLD5, C-terminal)	GO:0005634, GO:0006260, GO:0006261	84	675	0	1	0	0.437037	NA	UROBE1963355_EIv1.0_0008110	0.12384	0.17676	9
allind	UROBE1963355_EIv1.0_0008120	0	1	UROBE1963355_EIv1.0_0008120.1	High	transposable_element_gene	Integrase catalytic domain-containing protein	IPR012337 (Ribonuclease H-like domain)	GO:0000943, GO:0003676, GO:0015074	84	2418	4	5	0.000128601	0.442485	-1.25004	UROBE1963355_EIv1.0_0008120	0.092919	0.14777	48
allind	UROBE1963355_EIv1.0_0008130	0	2	UROBE1963355_EIv1.0_0008130.1	High	protein_coding_gene	ARM repeat-containing protein	IPR016024 (Armadillo-type fold)	None	84	4053	1	2	5.87454e-06	0.458176	-1.04726	UROBE1963355_EIv1.0_0008130	0.07867	0.13207	16
allind	UROBE1963355_EIv1.0_0008140	0	1	UROBE1963355_EIv1.0_0008140.1	Low	predicted_gene	Unknown protein	None	None	84	429	0	1	0	0.491841	NA	UROBE1963355_EIv1.0_0008140	0.076161	0.16953	12
allind	UROBE1963355_EIv1.0_0008150	0	1	UROBE1963355_EIv1.0_0008150.1	High	transposable_element_gene	Integrase catalytic domain-containing protein	IPR013103 (Reverse transcriptase, RNA-dependent DNA polymerase)	GO:0000943, GO:0003676, GO:0015074	84	969	1	2	4.85504e-05	0.419996	-0.909084	UROBE1963355_EIv1.0_0008150	0.11618	0.27304	14
allind	UROBE1963355_EIv1.0_0008160	0	1	UROBE1963355_EIv1.0_0008160.1	Low	transposable_element_gene	Unknown protein	None	None	84	264	0	1	0	0.488636	NA	UROBE1963355_EIv1.0_0008160	0.13294	0.26548	12
allind	UROBE1963355_EIv1.0_0008170	0	1	UROBE1963355_EIv1.0_0008170.1	High	transposable_element_gene	DUF4219 domain-containing protein	None	None	84	390	0	1	0	0.466667	NA	UROBE1963355_EIv1.0_0008170	0.078216	0.18303	6
allind	UROBE1963355_EIv1.0_0008180	0	1	UROBE1963355_EIv1.0_0008180.1	High	transposable_element_gene	Integrase catalytic domain-containing protein	IPR025724 (GAG-pre-integrase domain)	GO:0000943, GO:0003676, GO:0015074	84	1098	0	1	0	0.445355	NA	UROBE1963355_EIv1.0_0008180	0.15034	0.24657	12
allind	UROBE1963355_EIv1.0_0008190	0	1	UROBE1963355_EIv1.0_0008190.1	High	protein_coding_gene	Endoplasmic reticulum protein	IPR005344 (Per33/Pom33 family)	GO:0016020, GO:0016021	84	858	0	1	0	0.484849	NA	UROBE1963355_EIv1.0_0008190	0.15813	0.32569	18
allind	UROBE1963355_EIv1.0_0008200	0	1	UROBE1963355_EIv1.0_0008200.1	High	protein_coding_gene	DNA-directed RNA polymerase subunit	IPR000268 (DNA-directed RNA polymerase, subunit N/Rpb10), IPR009057 (Homeobox domain-like), IPR023580 (RNA polymerase subunit RPB10)	GO:0003677, GO:0003899, GO:0006351, GO:0008270	84	219	0	1	0	0.461187	NA	UROBE1963355_EIv1.0_0008200	0.11082	0.25124	15
allind	UROBE1963355_EIv1.0_0008210	0	1	UROBE1963355_EIv1.0_0008210.1	High	protein_coding_gene	Mitochondrial glyco protein	IPR003428 (Mitochondrial glycoprotein)	GO:0005759	84	801	1	2	0.000241737	0.50049	-0.037379	UROBE1963355_EIv1.0_0008210	0.15201	0.25052	15
allind	UROBE1963355_EIv1.0_0008220	0	8	UROBE1963355_EIv1.0_0008220.1	High	protein_coding_gene	Protein YIP	IPR006977 (Yip1 domain)	GO:0016020, GO:0016021	84	804	0	1	0	0.470149	NA	UROBE1963355_EIv1.0_0008220	0.11346	0.39558	32
allind	UROBE1963355_EIv1.0_0008230	0	1	UROBE1963355_EIv1.0_0008230.1	High	protein_coding_gene	1,3-beta-glucanosyltransferase	IPR004886 (Glucanosyltransferase), IPR012946 (X8 domain), IPR017853 (Glycoside hydrolase superfamily)	GO:0005886, GO:0016020, GO:0016740, GO:0031225	84	1764	0	1	0	0.435941	NA	UROBE1963355_EIv1.0_0008230	0.12507	0.22582	19
allind	UROBE1963355_EIv1.0_0008240	0	1	UROBE1963355_EIv1.0_0008240.1	High	transposable_element_gene	Integrase catalytic domain-containing protein	IPR013103 (Reverse transcriptase, RNA-dependent DNA polymerase)	GO:0000943, GO:0003676, GO:0015074	84	1749	2	3	2.72264e-05	0.515165	-1.40128	UROBE1963355_EIv1.0_0008240	0.1169	0.28365	10
allind	UROBE1963355_EIv1.0_0008250	0	1	UROBE1963355_EIv1.0_0008250.1	High	transposable_element_gene	Integrase catalytic domain-containing protein	None	GO:0000943, GO:0003676, GO:0015074	84	1338	0	1	0	0.51719	NA	UROBE1963355_EIv1.0_0008250	0.146	0.30974	11
allind	UROBE1963355_EIv1.0_0008260	0	1	UROBE1963355_EIv1.0_0008260.1	Low	protein_coding_gene	Unknown protein	None	None	84	138	0	1	0	0.362319	NA	UROBE1963355_EIv1.0_0008260	0.06003	0.07654	23
allind	UROBE1963355_EIv1.0_0008270	0	2	UROBE1963355_EIv1.0_0008270.1	High	protein_coding_gene	Homeobox domain-containing protein	IPR009057 (Homeobox domain-like)	GO:0003677, GO:0005634	84	1881	1	2	0.000165925	0.496114	0.66715	UROBE1963355_EIv1.0_0008270	0.057294	0.078306	17
allind	UROBE1963355_EIv1.0_0008280	0	1	UROBE1963355_EIv1.0_0008280.1	High	transposable_element_gene	Integrase catalytic domain-containing protein	None	GO:0003676, GO:0015074	84	699	0	1	0	0.499285	NA	UROBE1963355_EIv1.0_0008280	0.068762	0.091726	22
allind	UROBE1963355_EIv1.0_0008290	0	1	UROBE1963355_EIv1.0_0008290.1	Low	transposable_element_gene	Unknown protein	None	None	84	189	0	1	0	0.354497	NA	UROBE1963355_EIv1.0_0008290	0.044053	0.062582	32
allind	UROBE1963355_EIv1.0_0008300	0	3	UROBE1963355_EIv1.0_0008300.1	High	protein_coding_gene	Triosephosphate isomerase	IPR000652 (Triosephosphate isomerase), IPR013785 (Aldolase-type TIM barrel)	GO:0003824, GO:0004807, GO:0006094, GO:0006096, GO:0016853	84	768	0	1	0	0.515625	NA	UROBE1963355_EIv1.0_0008300	0.045093	0.064078	24
allind	UROBE1963355_EIv1.0_0008310	0	1	UROBE1963355_EIv1.0_0008310.1	Low	transposable_element_gene	Unknown protein	None	None	84	243	1	2	0.00115689	0.44513	0.482915	UROBE1963355_EIv1.0_0008310	0.066804	0.074621	36
allind	UROBE1963355_EIv1.0_0008320	0	1	UROBE1963355_EIv1.0_0008320.1	High	transposable_element_gene	Retrotrans_gag domain-containing protein	IPR005162 (Retrotransposon gag domain), IPR032567 (LDOC1-related)	None	84	630	5	6	0.00137238	0.495068	-0.296248	UROBE1963355_EIv1.0_0008320	0.066364	0.07082	38
allind	UROBE1963355_EIv1.0_0008330	0	1	UROBE1963355_EIv1.0_0008330.1	Low	transposable_element_gene	Unknown protein	None	None	84	219	0	1	0	0.56621	NA	UROBE1963355_EIv1.0_0008330	0.087824	0.10909	30
allind	UROBE1963355_EIv1.0_0008340	0	1	UROBE1963355_EIv1.0_0008340.1	High	protein_coding_gene	Translation initiation factor eIF-2B gamma subunit	IPR011004 (Trimeric LpxA-like), IPR029044 (Nucleotide-diphospho-sugar transferases)	GO:0003743, GO:0006413	84	1671	0	1	0	0.566128	NA	UROBE1963355_EIv1.0_0008340	0.030198	0.025927	29
allind	UROBE1963355_EIv1.0_0008350	0	3	UROBE1963355_EIv1.0_0008350.1	Low	protein_coding_gene	Unknown protein	None	None	84	231	3	4	0.00124555	0.349979	-0.964314	UROBE1963355_EIv1.0_0008350	0.058807	0.083657	11
allind	UROBE1963355_EIv1.0_0008360	0	1	UROBE1963355_EIv1.0_0008360.1	Low	transposable_element_gene	Unknown protein	None	None	84	213	0	1	0	0.455399	NA	UROBE1963355_EIv1.0_0008360	0.041985	0.052977	27
allind	UROBE1963355_EIv1.0_0008370	0	2	UROBE1963355_EIv1.0_0008370.1	High	protein_coding_gene	DUF726 domain protein	IPR007941 (Protein of unknown function DUF726)	GO:0016020, GO:0016021	84	2001	2	2	9.17499e-05	0.561172	-0.860315	UROBE1963355_EIv1.0_0008370	0.074691	0.094494	19
allind	UROBE1963355_EIv1.0_0008380	0	9	UROBE1963355_EIv1.0_0008380.1	High	protein_coding_gene	Unknown protein	None	None	84	1101	2	3	8.49382e-05	0.436832	-1.21867	UROBE1963355_EIv1.0_0008380	0.08784	0.10367	20
allind	UROBE1963355_EIv1.0_0008390	0	3	UROBE1963355_EIv1.0_0008390.1	High	protein_coding_gene	MutL_C domain-containing protein	IPR003594 (Histidine kinase-like ATPase, C-terminal domain), IPR013507 (DNA mismatch repair protein, C-terminal), IPR014790 (MutL, C-terminal, dimerisation), IPR028830 (DNA mismatch repair protein Mlh3)	GO:0005524, GO:0006298, GO:0007131, GO:0016887, GO:0032300	84	2718	1	2	1.73088e-05	0.472415	-0.909084	UROBE1963355_EIv1.0_0008390	0.013992	0.0072012	46
allind	UROBE1963355_EIv1.0_0008400	0	1	UROBE1963355_EIv1.0_0008400.1	High	protein_coding_gene	Integrase catalytic domain-containing protein	None	GO:0003676, GO:0015074	84	750	1	2	0.000206158	0.430667	-0.269379	UROBE1963355_EIv1.0_0008400	0.069203	0.14178	19
allind	UROBE1963355_EIv1.0_0008410	0	2	UROBE1963355_EIv1.0_0008410.1	High	protein_coding_gene	Zn(2)-C6 fungal-type domain-containing protein	IPR001138 (Zn(2)-C6 fungal-type DNA-binding domain), IPR007219 (Transcription factor domain, fungi)	None	84	2790	1	2	0.000180959	0.506981	1.8135	UROBE1963355_EIv1.0_0008410	0.086674	0.19313	9
allind	UROBE1963355_EIv1.0_0008420	0	1	UROBE1963355_EIv1.0_0008420.1	Low	predicted_gene	Unknown protein	None	None	82	297	0	1	0	0.407407	NA	UROBE1963355_EIv1.0_0008420	0.16937	0.26698	4
allind	UROBE1963355_EIv1.0_0008430	0	8	UROBE1963355_EIv1.0_0008430.1	High	protein_coding_gene	Phosphatidylinositol N-acetylglucosaminyltransferase	IPR009450 (Phosphatidylinositol N-acetylglucosaminyltransferase subunit C)	GO:0006506, GO:0016020, GO:0016021, GO:0016740, GO:0016757, GO:0017176	84	915	0	1	0	0.481967	NA	UROBE1963355_EIv1.0_0008430	0.15458	0.22277	5
allind	UROBE1963355_EIv1.0_0008440	0	2	UROBE1963355_EIv1.0_0008440.1	High	protein_coding_gene	AIP3 domain-containing protein	IPR022782 (Actin interacting protein 3, C-terminal)	GO:0005519, GO:0051125	84	3405	2	3	0.000160322	0.48898	0.581107	UROBE1963355_EIv1.0_0008440	0.028393	0.032462	8
allind	UROBE1963355_EIv1.0_0008450	0	5	UROBE1963355_EIv1.0_0008450.1	High	protein_coding_gene	Palmitoyltransferase	IPR001594 (Palmitoyltransferase, DHHC domain)	GO:0016020, GO:0016021, GO:0016740, GO:0016746, GO:0019706	84	1179	2	3	0.000309246	0.487893	-0.140174	UROBE1963355_EIv1.0_0008450	0.060183	0.069031	10
allind	UROBE1963355_EIv1.0_0008460	0	1	UROBE1963355_EIv1.0_0008460.1	High	transposable_element_gene	DNA-directed RNA polymerase	None	GO:0003677, GO:0003899, GO:0006351	84	642	1	2	0.000486146	0.51528	0.66715	UROBE1963355_EIv1.0_0008460	0.094602	0.17726	14
allind	UROBE1963355_EIv1.0_0008470	0	1	UROBE1963355_EIv1.0_0008470.1	High	protein_coding_gene	CRIB domain-containing protein	IPR000095 (CRIB domain)	None	84	828	0	1	0	0.490338	NA	UROBE1963355_EIv1.0_0008470	0.061432	0.1377	17
allind	UROBE1963355_EIv1.0_0008480	0	1	UROBE1963355_EIv1.0_0008480.1	High	transposable_element_gene	Integrase catalytic domain-containing protein	None	GO:0000943, GO:0003676, GO:0015074	84	876	0	1	0	0.424658	NA	UROBE1963355_EIv1.0_0008480	0.026784	0.049163	24
allind	UROBE1963355_EIv1.0_0008490	0	1	UROBE1963355_EIv1.0_0008490.1	Low	transposable_element_gene	Unknown protein	None	None	84	282	0	1	0	0.429078	NA	UROBE1963355_EIv1.0_0008490	0.024727	0.048257	25
allind	UROBE1963355_EIv1.0_0008500	0	2	UROBE1963355_EIv1.0_0008500.1	High	transposable_element_gene	Integrase catalytic domain-containing protein	None	GO:0000943, GO:0003676, GO:0015074	84	210	0	1	0	0.442857	NA	UROBE1963355_EIv1.0_0008500	0.059602	0.14463	31
allind	UROBE1963355_EIv1.0_0008510	0	2	UROBE1963355_EIv1.0_0008510.1	High	protein_coding_gene	Tryptophanyl-tRNA synthetase	IPR002305 (Aminoacyl-tRNA synthetase, class Ic)	GO:0000166, GO:0004812, GO:0004830, GO:0005524, GO:0005737, GO:0006412, GO:0006418, GO:0006436, GO:0016874	84	1677	0	1	0	0.471079	NA	UROBE1963355_EIv1.0_0008510	0.043345	0.057613	51
allind	UROBE1963355_EIv1.0_0008520	0	3	UROBE1963355_EIv1.0_0008520.1	High	protein_coding_gene	DUF300-domain-containing protein	IPR005178 (Organic solute transporter subunit alpha/Transmembrane protein 184)	GO:0016020, GO:0016021	84	1209	0	1	0	0.497932	NA	UROBE1963355_EIv1.0_0008520	0.028226	0.043494	55
allind	UROBE1963355_EIv1.0_0008530	0	1	UROBE1963355_EIv1.0_0008530.1	Low	transposable_element_gene	Unknown protein	None	None	84	189	0	1	0	0.439153	NA	UROBE1963355_EIv1.0_0008530	0.024916	0.045838	42
allind	UROBE1963355_EIv1.0_0008540	0	2	UROBE1963355_EIv1.0_0008540.1	High	protein_coding_gene	Anaphase-promoting complex subunit cdc27	IPR011990 (Tetratricopeptide-like helical domain)	None	84	2667	2	3	1.78549e-05	0.491189	-1.40128	UROBE1963355_EIv1.0_0008540	0.071369	0.11264	56
allind	UROBE1963355_EIv1.0_0008550	0	3	UROBE1963355_EIv1.0_0008550.1	High	protein_coding_gene	F-BAR domain-containing protein	IPR001060 (FCH domain), IPR031160 (F-BAR domain)	None	84	1164	3	4	0.000573723	0.445692	0.210343	UROBE1963355_EIv1.0_0008550	0.12055	0.185	21
allind	UROBE1963355_EIv1.0_0008560	0	1	UROBE1963355_EIv1.0_0008560.1	Low	transposable_element_gene	Unknown protein	None	None	84	231	7	9	0.00396391	0.403834	-0.833296	UROBE1963355_EIv1.0_0008560	0.043796	0.10433	35
allind	UROBE1963355_EIv1.0_0008570	0	2	UROBE1963355_EIv1.0_0008570.1	High	protein_coding_gene	Integrase catalytic domain-containing protein	None	GO:0000943, GO:0003676, GO:0015074	84	627	0	1	0	0.416268	NA	UROBE1963355_EIv1.0_0008570	0.051702	0.13022	7
allind	UROBE1963355_EIv1.0_0008580	0	1	UROBE1963355_EIv1.0_0008580.1	High	protein_coding_gene	Adenylosuccinate lyase	IPR008948 (L-Aspartase-like)	GO:0003824, GO:0016829	84	675	1	2	0.000135994	0.488889	-0.642967	UROBE1963355_EIv1.0_0008580	0.10485	0.11037	9
allind	UROBE1963355_EIv1.0_0008590	0	2	UROBE1963355_EIv1.0_0008590.1	High	protein_coding_gene	Fermentation associated protein (Csf1), putative	None	GO:0006113, GO:0016020, GO:0016021	84	9663	3	4	4.26003e-05	0.464892	-0.581331	UROBE1963355_EIv1.0_0008590	0.068945	0.13987	19
allind	UROBE1963355_EIv1.0_0008600	0	1	UROBE1963355_EIv1.0_0008600.1	Low	protein_coding_gene	CCHC-type domain-containing protein	None	GO:0003676, GO:0008270	84	768	0	1	0	0.497396	NA	UROBE1963355_EIv1.0_0008600	0.059019	0.2003	18
allind	UROBE1963355_EIv1.0_0008610	0	1	UROBE1963355_EIv1.0_0008610.1	High	transposable_element_gene	CCHC-type domain-containing protein	IPR001878 (Zinc finger, CCHC-type)	GO:0003676, GO:0008270	84	1143	6	4	0.000341323	0.562367	-1.56051	UROBE1963355_EIv1.0_0008610	0.044258	0.067155	49
allind	UROBE1963355_EIv1.0_0008620	0	1	UROBE1963355_EIv1.0_0008620.1	Low	transposable_element_gene	Unknown protein	None	None	84	455	0	1	0	0.547253	NA	UROBE1963355_EIv1.0_0008620	0.044258	0.067155	49
allind	UROBE1963355_EIv1.0_0008630	1	4	UROBE1963355_EIv1.0_0008630.1	High	protein_coding_gene	Unknown protein	None	None	84	393	0	1	0	0.51654	NA	UROBE1963355_EIv1.0_0008630	0.041862	0.066264	49
allind	UROBE1963355_EIv1.0_0008640	0	1	UROBE1963355_EIv1.0_0008640.1	High	transposable_element_gene	Integrase catalytic domain-containing protein	IPR012337 (Ribonuclease H-like domain)	GO:0000943, GO:0003676, GO:0015074	84	735	0	1	0	0.468027	NA	UROBE1963355_EIv1.0_0008640	0.094521	0.26549	16
allind	UROBE1963355_EIv1.0_0008650	0	2	UROBE1963355_EIv1.0_0008650.1	High	transposable_element_gene	Integrase catalytic domain-containing protein	None	GO:0000943, GO:0003676, GO:0015074	84	819	34	23	0.00864123	0.447163	0.129464	UROBE1963355_EIv1.0_0008650	0.013422	0.016731	98
allind	UROBE1963355_EIv1.0_0008660	0	1	UROBE1963355_EIv1.0_0008660.1	High	protein_coding_gene	Polyadenylate-binding protein	IPR012677 (Nucleotide-binding alpha-beta plait domain)	GO:0003676, GO:0003723, GO:0005737	84	828	1	2	2.87555e-05	0.524169	-1.04726	UROBE1963355_EIv1.0_0008660	0.16311	0.27805	13
allind	UROBE1963355_EIv1.0_0008670	0	1	UROBE1963355_EIv1.0_0008670.1	Low	predicted_gene	Unknown protein	None	None	84	181	0	1	0	0.546961	NA	UROBE1963355_EIv1.0_0008670	0.14003	0.25844	11
allind	UROBE1963355_EIv1.0_0008680	0	3	UROBE1963355_EIv1.0_0008680.1	High	protein_coding_gene	Unknown protein	None	None	84	927	1	2	0.000456441	0.494388	1.32733	UROBE1963355_EIv1.0_0008680	0.14709	0.25768	13
allind	UROBE1963355_EIv1.0_0008690	0	1	UROBE1963355_EIv1.0_0008690.1	High	protein_coding_gene	Unplaced genomic scaffold K443scaffold_32, whole genome shotgun sequence	IPR031355 (Protein of unknown function DUF5102)	None	84	1473	4	6	0.00046856	0.489849	-0.28003	UROBE1963355_EIv1.0_0008690	0.1224	0.50368	27
allind	UROBE1963355_EIv1.0_0008700	0	2	UROBE1963355_EIv1.0_0008700.1	High	transposable_element_gene	Integrase catalytic domain-containing protein	None	None	84	1134	2	3	0.000191747	0.478752	-0.725645	UROBE1963355_EIv1.0_0008700	0.11038	0.38568	27
allind	UROBE1963355_EIv1.0_0008710	0	1	UROBE1963355_EIv1.0_0008710.1	Low	transposable_element_gene	Unknown protein	None	None	84	126	0	1	0	0.452381	NA	UROBE1963355_EIv1.0_0008710	0.066917	0.13507	28
allind	UROBE1963355_EIv1.0_0008720	0	2	UROBE1963355_EIv1.0_0008720.1	High	protein_coding_gene	F-box domain-containing protein	IPR001810 (F-box domain)	None	84	1683	0	1	0	0.569222	NA	UROBE1963355_EIv1.0_0008720	0.069984	0.13582	27
allind	UROBE1963355_EIv1.0_0008730	0	2	UROBE1963355_EIv1.0_0008730.1	High	protein_coding_gene	RPAP1_C domain-containing protein	IPR013929 (RNA polymerase II-associated protein 1, C-terminal), IPR013930 (RNA polymerase II-associated protein 1, N-terminal)	GO:0006366	84	4101	2	3	1.16116e-05	0.476469	-1.40128	UROBE1963355_EIv1.0_0008730	0.085162	0.21669	37
allind	UROBE1963355_EIv1.0_0008740	0	1	UROBE1963355_EIv1.0_0008740.1	High	transposable_element_gene	Integrase catalytic domain-containing protein	None	GO:0000943, GO:0003676, GO:0015074	84	580	0	1	0	0.448276	NA	UROBE1963355_EIv1.0_0008740	0.07952	0.11871	17
allind	UROBE1963355_EIv1.0_0008750	0	2	UROBE1963355_EIv1.0_0008750.1	High	protein_coding_gene	Unknown protein	None	None	84	897	1	2	0.000423097	0.482999	1.06803	UROBE1963355_EIv1.0_0008750	0.063227	0.12377	17
allind	UROBE1963355_EIv1.0_0008760	0	3	UROBE1963355_EIv1.0_0008760.1	High	protein_coding_gene	Protein-serine/threonine kinase	IPR003594 (Histidine kinase-like ATPase, C-terminal domain), IPR018955 (Branched-chain alpha-ketoacid dehydrogenase kinase/Pyruvate dehydrogenase kinase, N-terminal)	GO:0004672, GO:0006468	84	1599	4	5	0.000191959	0.480404	-1.26031	UROBE1963355_EIv1.0_0008760	0.058119	0.13519	16
allind	UROBE1963355_EIv1.0_0008770	0	1	UROBE1963355_EIv1.0_0008770.1	High	protein_coding_gene	Unplaced genomic scaffold scaffold_28, whole genome shotgun sequence	None	GO:0016020, GO:0016021	84	2205	4	5	4.31919e-05	0.448537	-1.80181	UROBE1963355_EIv1.0_0008770	0.09072	0.17013	16
allind	UROBE1963355_EIv1.0_0008780	0	1	UROBE1963355_EIv1.0_0008780.1	High	transposable_element_gene	Integrase catalytic domain-containing protein	None	GO:0000943, GO:0003676, GO:0015074	84	1029	1	2	6.77429e-05	0.44117	-0.774319	UROBE1963355_EIv1.0_0008780	0.13172	0.20463	13
allind	UROBE1963355_EIv1.0_0008790	0	1	UROBE1963355_EIv1.0_0008790.1	High	transposable_element_gene	Integrase catalytic domain-containing protein	None	GO:0000943, GO:0003676, GO:0015074	84	663	1	2	0.000514015	0.473282	0.837738	UROBE1963355_EIv1.0_0008790	0.031869	0.034064	37
allind	UROBE1963355_EIv1.0_0008800	0	1	UROBE1963355_EIv1.0_0008800.1	High	transposable_element_gene	Retrotrans_gag domain-containing protein	IPR032567 (LDOC1-related)	None	84	825	1	2	0.000234705	0.501688	-0.037379	UROBE1963355_EIv1.0_0008800	0.024207	0.057369	34
allind	UROBE1963355_EIv1.0_0008810	0	1	UROBE1963355_EIv1.0_0008810.1	Low	transposable_element_gene	Unknown protein	None	None	84	201	14	10	0.00858159	0.660092	-1.07472	UROBE1963355_EIv1.0_0008810	0.010131	0.024187	31
allind	UROBE1963355_EIv1.0_0008820	0	1	UROBE1963355_EIv1.0_0008820.1	Low	transposable_element_gene	Integrase catalytic domain-containing protein	None	GO:0000943, GO:0003676, GO:0015074	84	213	1	2	0.00116361	0.413816	0.285033	UROBE1963355_EIv1.0_0008820	0.066103	0.15103	17
allind	UROBE1963355_EIv1.0_0008830	0	1	UROBE1963355_EIv1.0_0008830.1	High	transposable_element_gene	Integrase catalytic domain-containing protein	None	GO:0000943, GO:0003676, GO:0015074	84	747	1	2	3.18735e-05	0.398913	-1.04726	UROBE1963355_EIv1.0_0008830	0.049444	0.087113	13
allind	UROBE1963355_EIv1.0_0008840	0	1	UROBE1963355_EIv1.0_0008840.1	High	protein_coding_gene	Cytochrome P450	IPR001128 (Cytochrome P450)	GO:0004497, GO:0005506, GO:0016491, GO:0016705, GO:0020037, GO:0046872, GO:0055114	84	1566	2	3	8.86597e-05	0.492991	-1.03835	UROBE1963355_EIv1.0_0008840	0.077687	0.097932	19
allind	UROBE1963355_EIv1.0_0008850	0	1	UROBE1963355_EIv1.0_0008850.1	Low	predicted_gene	Unknown protein	None	None	84	294	0	1	0	0.462585	NA	UROBE1963355_EIv1.0_0008850	0.032412	0.033436	10
allind	UROBE1963355_EIv1.0_0008860	0	1	UROBE1963355_EIv1.0_0008860.1	Low	transposable_element_gene	Integrase catalytic domain-containing protein	IPR012337 (Ribonuclease H-like domain)	GO:0000943, GO:0003676, GO:0015074	84	213	0	1	0	0.389671	NA	UROBE1963355_EIv1.0_0008860	0.066129	0.068592	13
allind	UROBE1963355_EIv1.0_0008870	0	1	UROBE1963355_EIv1.0_0008870.1	Low	transposable_element_gene	Unknown protein	None	None	84	111	0	1	0	0.432432	NA	UROBE1963355_EIv1.0_0008870	0.074331	0.069457	11
allind	UROBE1963355_EIv1.0_0008880	0	1	UROBE1963355_EIv1.0_0008880.1	Low	transposable_element_gene	Integrase catalytic domain-containing protein	None	GO:0000943, GO:0003676, GO:0015074	84	183	0	1	0	0.491803	NA	UROBE1963355_EIv1.0_0008880	0.14015	0.31548	17
allind	UROBE1963355_EIv1.0_0008890	0	2	UROBE1963355_EIv1.0_0008890.1	High	transposable_element_gene	Integrase catalytic domain-containing protein	None	GO:0000943, GO:0003676, GO:0015074	84	930	1	2	2.56016e-05	0.470981	-1.04726	UROBE1963355_EIv1.0_0008890	0.14341	0.28095	19
allind	UROBE1963355_EIv1.0_0008900	0	4	UROBE1963355_EIv1.0_0008900.1	High	protein_coding_gene	Dicer-like protein 1	IPR000999 (Ribonuclease III domain), IPR001650 (Helicase, C-terminal), IPR005034 (Dicer dimerisation domain), IPR014001 (Helicase superfamily 1/2, ATP-binding domain), IPR027417 (P-loop containing nucleoside triphosphate hydrolase)	None	84	5016	4	5	6.25651e-05	0.483481	-1.2427	UROBE1963355_EIv1.0_0008900	0.086972	0.17274	20
allind	UROBE1963355_EIv1.0_0008910	0	2	UROBE1963355_EIv1.0_0008910.1	Low	protein_coding_gene	Unknown protein	None	None	84	651	1	2	7.22662e-05	0.502268	-0.909084	UROBE1963355_EIv1.0_0008910	0.085316	0.22308	12
allind	UROBE1963355_EIv1.0_0008920	0	1	UROBE1963355_EIv1.0_0008920.1	High	transposable_element_gene	Reverse transcriptase domain-containing protein	None	None	84	564	0	1	0	0.533688	NA	UROBE1963355_EIv1.0_0008920	0.036697	0.059384	10
allind	UROBE1963355_EIv1.0_0008930	0	1	UROBE1963355_EIv1.0_0008930.1	High	transposable_element_gene	Reverse transcriptase domain-containing protein	None	None	84	486	0	1	0	0.537037	NA	UROBE1963355_EIv1.0_0008930	0.067456	0.09164	11
allind	UROBE1963355_EIv1.0_0008940	0	1	UROBE1963355_EIv1.0_0008940.1	High	transposable_element_gene	Reverse transcriptase domain-containing protein	IPR000477 (Reverse transcriptase domain)	None	84	1227	0	1	0	0.488997	NA	UROBE1963355_EIv1.0_0008940	0.079703	0.095696	12
allind	UROBE1963355_EIv1.0_0008950	0	1	UROBE1963355_EIv1.0_0008950.1	Low	transposable_element_gene	Unknown protein	None	None	84	327	0	1	0	0.458716	NA	UROBE1963355_EIv1.0_0008950	0.055968	0.057781	41
allind	UROBE1963355_EIv1.0_0008960	0	1	UROBE1963355_EIv1.0_0008960.1	High	transposable_element_gene	Integrase catalytic domain-containing protein	None	GO:0000943, GO:0003676, GO:0015074	84	236	9	8	0.0128954	0.4432	1.77196	UROBE1963355_EIv1.0_0008960	0.021857	0.037943	25
allind	UROBE1963355_EIv1.0_0008970	0	4	UROBE1963355_EIv1.0_0008970.1	High	protein_coding_gene	GATA-type domain-containing protein	IPR013088 (Zinc finger, NHR/GATA-type)	GO:0003700, GO:0006355, GO:0008270, GO:0043565, GO:0046872	84	1950	1	2	3.57474e-05	0.590751	-0.774319	UROBE1963355_EIv1.0_0008970	0.066624	0.078933	15
allind	UROBE1963355_EIv1.0_0008980	0	1	UROBE1963355_EIv1.0_0008980.1	Low	protein_coding_gene	Unknown protein	None	None	84	240	0	1	0	0.579167	NA	UROBE1963355_EIv1.0_0008980	0.12575	0.19349	12
allind	UROBE1963355_EIv1.0_0008990	0	1	UROBE1963355_EIv1.0_0008990.1	High	transposable_element_gene	Integrase catalytic domain-containing protein	None	GO:0000943, GO:0003676, GO:0015074	84	456	0	1	0	0.43421	NA	UROBE1963355_EIv1.0_0008990	0.065493	0.10334	35
allind	UROBE1963355_EIv1.0_0009000	0	1	UROBE1963355_EIv1.0_0009000.1	High	transposable_element_gene	Integrase_H2C2 domain-containing protein	None	None	84	552	6	5	0.000835641	0.516196	-1.42334	UROBE1963355_EIv1.0_0009000	0.041316	0.046735	43
allind	UROBE1963355_EIv1.0_0009010	0	1	UROBE1963355_EIv1.0_0009010.1	Low	transposable_element_gene	Integrase catalytic domain-containing protein	None	GO:0000943, GO:0003676, GO:0015074	84	1344	1	2	1.77154e-05	0.441211	-1.04726	UROBE1963355_EIv1.0_0009010	0.062211	0.15421	34
allind	UROBE1963355_EIv1.0_0009020	0	1	UROBE1963355_EIv1.0_0009020.1	High	transposable_element_gene	Integrase catalytic domain-containing protein	None	GO:0000943, GO:0003676, GO:0015074	84	591	1	2	4.02868e-05	0.43824	-1.04726	UROBE1963355_EIv1.0_0009020	0.067866	0.22374	20
allind	UROBE1963355_EIv1.0_0009030	0	1	UROBE1963355_EIv1.0_0009030.1	Low	predicted_gene	Unknown protein	None	None	84	198	0	1	0	0.449495	NA	UROBE1963355_EIv1.0_0009030	0.083244	0.13645	16
allind	UROBE1963355_EIv1.0_0009040	0	7	UROBE1963355_EIv1.0_0009040.1	High	protein_coding_gene	SMP domain-containing protein	None	None	84	291	0	1	0	0.52921	NA	UROBE1963355_EIv1.0_0009040	0.048858	0.050598	40
allind	UROBE1963355_EIv1.0_0009050	0	1	UROBE1963355_EIv1.0_0009050.1	High	transposable_element_gene	RNase H domain-containing protein	IPR012337 (Ribonuclease H-like domain)	None	84	858	0	1	0	0.474359	NA	UROBE1963355_EIv1.0_0009050	0.048786	0.050432	40
allind	UROBE1963355_EIv1.0_0009060	0	2	UROBE1963355_EIv1.0_0009060.1	High	transposable_element_gene	Integrase catalytic domain-containing protein	None	GO:0000943, GO:0003676, GO:0015074	84	429	0	1	0	0.41958	NA	UROBE1963355_EIv1.0_0009060	0.06211	0.12656	25
allind	UROBE1963355_EIv1.0_0009070	0	1	UROBE1963355_EIv1.0_0009070.1	Low	transposable_element_gene	Unknown protein	None	None	84	176	0	1	0	0.460227	NA	UROBE1963355_EIv1.0_0009070	0.024744	0.016019	13
allind	UROBE1963355_EIv1.0_0009080	0	1	UROBE1963355_EIv1.0_0009080.1	High	transposable_element_gene	RNase H domain-containing protein	IPR012337 (Ribonuclease H-like domain)	None	84	828	0	1	0	0.437198	NA	UROBE1963355_EIv1.0_0009080	0.024744	0.016019	13
allind	UROBE1963355_EIv1.0_0009090	0	1	UROBE1963355_EIv1.0_0009090.1	High	protein_coding_gene	Phospholipase	IPR015679 (Phospholipase D family), IPR025202 (Phospholipase D-like domain)	GO:0003824, GO:0004630, GO:0006654, GO:0016042, GO:0016787, GO:0035091, GO:0048017, GO:0048870, GO:0070290	84	4113	1	2	5.60053e-05	0.482584	0.180974	UROBE1963355_EIv1.0_0009090	0.059806	0.046764	8
allind	UROBE1963355_EIv1.0_0009100	0	2	UROBE1963355_EIv1.0_0009100.1	High	protein_coding_gene	Sec39 domain-containing protein	IPR013244 (Sec39 domain)	GO:0006890	84	3270	1	2	2.13172e-05	0.468512	-0.774319	UROBE1963355_EIv1.0_0009100	0.063015	0.10176	20
allind	UROBE1963355_EIv1.0_0009110	0	3	UROBE1963355_EIv1.0_0009110.1	High	protein_coding_gene	ATP synthase subunit beta	IPR005722 (ATP synthase, F1 complex, beta subunit), IPR024034 (ATPase, F1/V1 complex, beta subunit, C-terminal), IPR027417 (P-loop containing nucleoside triphosphate hydrolase)	GO:0000166, GO:0005524, GO:0006754, GO:0015986, GO:0045261, GO:0046034, GO:0046933, GO:0099132, GO:1902600	84	1629	93	38	0.00654305	0.518453	-1.42581	UROBE1963355_EIv1.0_0009110	0.072199	0.11425	103
allind	UROBE1963355_EIv1.0_0009120	0	1	UROBE1963355_EIv1.0_0009120.1	High	transposable_element_gene	Reverse transcriptase domain-containing protein	None	None	84	261	0	1	0	0.452107	NA	UROBE1963355_EIv1.0_0009120	0.043092	0.067786	9
allind	UROBE1963355_EIv1.0_0009130	0	1	UROBE1963355_EIv1.0_0009130.1	High	transposable_element_gene	Endo/exonuclease/phosphatase domain-containing protein	None	None	84	168	1	2	0.000280032	0.434382	-0.909084	UROBE1963355_EIv1.0_0009130	0.034567	0.046647	8
allind	UROBE1963355_EIv1.0_0009140	0	3	UROBE1963355_EIv1.0_0009140.1	High	protein_coding_gene	Secreted protein	None	None	84	933	1	2	2.55193e-05	0.455533	-1.04726	UROBE1963355_EIv1.0_0009140	0.054072	0.10435	12
allind	UROBE1963355_EIv1.0_0009150	0	1	UROBE1963355_EIv1.0_0009150.1	Low	predicted_gene	Unknown protein	None	None	84	177	0	1	0	0.451977	NA	UROBE1963355_EIv1.0_0009150	0.036786	0.064683	10
allind	UROBE1963355_EIv1.0_0009160	0	1	UROBE1963355_EIv1.0_0009160.1	Low	predicted_gene	Unknown protein	None	None	84	231	0	1	0	0.411255	NA	UROBE1963355_EIv1.0_0009160	0.097451	0.25364	11
allind	UROBE1963355_EIv1.0_0009170	0	2	UROBE1963355_EIv1.0_0009170.1	High	transposable_element_gene	Integrase catalytic domain-containing protein	IPR012337 (Ribonuclease H-like domain)	GO:0003676, GO:0015074	84	1029	0	1	0	0.570457	NA	UROBE1963355_EIv1.0_0009170	0.077825	0.072497	22
allind	UROBE1963355_EIv1.0_0009180	0	1	UROBE1963355_EIv1.0_0009180.1	High	transposable_element_gene	Reverse transcriptase domain-containing protein	IPR021109 (Aspartic peptidase domain)	None	84	1785	0	1	0	0.546219	NA	UROBE1963355_EIv1.0_0009180	0.036558	0.017119	11
allind	UROBE1963355_EIv1.0_0009190	0	3	UROBE1963355_EIv1.0_0009190.1	High	protein_coding_gene	Malate dehydrogenase	IPR001557 (L-lactate/malate dehydrogenase)	GO:0003824, GO:0005975, GO:0006099, GO:0006108, GO:0016491, GO:0016615, GO:0016616, GO:0019752, GO:0030060, GO:0055114	84	999	1	2	2.38334e-05	0.503492	-1.04726	UROBE1963355_EIv1.0_0009190	0.02141	0.024982	7
allind	UROBE1963355_EIv1.0_0009200	0	2	UROBE1963355_EIv1.0_0009200.1	High	protein_coding_gene	Fe2OG dioxygenase domain-containing protein	None	GO:0016491, GO:0055114	84	426	0	1	0	0.478873	NA	UROBE1963355_EIv1.0_0009200	0.12619	0.3832	8
allind	UROBE1963355_EIv1.0_0009210	0	1	UROBE1963355_EIv1.0_0009210.1	High	transposable_element_gene	Integrase catalytic domain-containing protein	IPR012337 (Ribonuclease H-like domain)	GO:0000943, GO:0003676, GO:0015074	84	1788	3	3	9.12888e-05	0.423391	-1.34907	UROBE1963355_EIv1.0_0009210	0.048565	0.16889	16
allind	UROBE1963355_EIv1.0_0009220	0	2	UROBE1963355_EIv1.0_0009220.1	High	protein_coding_gene	BP28CT domain-containing protein	IPR012954 (BP28, C-terminal domain), IPR016024 (Armadillo-type fold), IPR022125 (U3 small nucleolar RNA-associated protein 10)	None	84	6375	1	2	7.37966e-06	0.467141	-0.909084	UROBE1963355_EIv1.0_0009220	0.088296	0.26882	20
allind	UROBE1963355_EIv1.0_0009230	0	2	UROBE1963355_EIv1.0_0009230.1	High	transposable_element_gene	Integrase catalytic domain-containing protein	IPR012337 (Ribonuclease H-like domain)	GO:0000943, GO:0003676, GO:0015074	84	2244	2	3	0.000211567	0.495867	0.298072	UROBE1963355_EIv1.0_0009230	0.075255	0.12077	28
allind	UROBE1963355_EIv1.0_0009240	0	1	UROBE1963355_EIv1.0_0009240.1	High	transposable_element_gene	Integrase catalytic domain-containing protein	IPR013103 (Reverse transcriptase, RNA-dependent DNA polymerase)	None	84	630	1	2	0.000179858	0.439588	-0.515026	UROBE1963355_EIv1.0_0009240	0.064211	0.079039	22
allind	UROBE1963355_EIv1.0_0009250	0	1	UROBE1963355_EIv1.0_0009250.1	High	transposable_element_gene	Integrase catalytic domain-containing protein	None	GO:0000943, GO:0003676, GO:0015074	84	282	0	1	0	0.475177	NA	UROBE1963355_EIv1.0_0009250	0.071876	0.092664	19
allind	UROBE1963355_EIv1.0_0009260	0	1	UROBE1963355_EIv1.0_0009260.1	Low	transposable_element_gene	Integrase catalytic domain-containing protein	None	GO:0000943, GO:0003676, GO:0015074	84	411	0	1	0	0.454988	NA	UROBE1963355_EIv1.0_0009260	0.044299	0.079709	59
allind	UROBE1963355_EIv1.0_0009270	0	1	UROBE1963355_EIv1.0_0009270.1	Low	transposable_element_gene	Unknown protein	None	None	84	576	1	2	4.1336e-05	0.541646	-1.04726	UROBE1963355_EIv1.0_0009270	0.041507	0.11454	25
allind	UROBE1963355_EIv1.0_0009280	0	1	UROBE1963355_EIv1.0_0009280.1	High	protein_coding_gene	Mitochondrial import receptor subunit	IPR002056 (Protein import receptor MAS20), IPR023392 (Mitochondrial outer membrane translocase complex, subunit Tom20 domain)	GO:0005742, GO:0006605, GO:0006886	84	1071	0	1	0	0.51634	NA	UROBE1963355_EIv1.0_0009280	0.012406	-0.0060731	15
allind	UROBE1963355_EIv1.0_0009290	0	4	UROBE1963355_EIv1.0_0009290.1	High	protein_coding_gene	Nonsense-mediated mRNA decay factor	IPR007193 (Up-frameshift suppressor 2), IPR016024 (Armadillo-type fold)	GO:0000184, GO:0003723	84	3432	1	2	6.93751e-06	0.44843	-1.04726	UROBE1963355_EIv1.0_0009290	0.041537	0.19301	22
allind	UROBE1963355_EIv1.0_0009300	0	8	UROBE1963355_EIv1.0_0009300.1	High	protein_coding_gene	Glyco_hydro_63 domain-containing protein	IPR004888 (Glycoside hydrolase family 63)	GO:0003824, GO:0004573, GO:0009311	84	3861	10	7	0.000258183	0.489803	-1.31521	UROBE1963355_EIv1.0_0009300	0.071456	0.32477	16
allind	UROBE1963355_EIv1.0_0009310	0	2	UROBE1963355_EIv1.0_0009310.1	High	protein_coding_gene	Exosome complex component RRP4	IPR004088 (K Homology domain, type 1), IPR012340 (Nucleic acid-binding, OB-fold), IPR025721 (Exosome complex component, N-terminal domain), IPR026699 (Exosome complex RNA-binding protein 1/RRP40/RRP4)	GO:0000176, GO:0000177, GO:0000178, GO:0000467, GO:0003723, GO:0034427, GO:0034475, GO:0043928, GO:0071034, GO:0071035, GO:0071038, GO:0071049, GO:0071051	84	1044	1	2	2.28061e-05	0.521084	-1.04726	UROBE1963355_EIv1.0_0009310	0.11938	0.23465	10
allind	UROBE1963355_EIv1.0_0009320	0	1	UROBE1963355_EIv1.0_0009320.1	High	protein_coding_gene	Protein PBN1	IPR013233 (Glycosylphosphatidylinositol-mannosyltransferase I, PIG-X/PBN1)	GO:0005789, GO:0006506, GO:0016020, GO:0016021	84	777	0	1	0	0.598456	NA	UROBE1963355_EIv1.0_0009320	0.22097	0.47378	3
allind	UROBE1963355_EIv1.0_0009330	0	2	UROBE1963355_EIv1.0_0009330.1	High	protein_coding_gene	Lipase_GDSL domain-containing protein	IPR013830 (SGNH hydrolase-type esterase domain)	None	84	1173	0	1	0	0.547315	NA	UROBE1963355_EIv1.0_0009330	0.094687	0.15869	4
allind	UROBE1963355_EIv1.0_0009340	0	2	UROBE1963355_EIv1.0_0009340.1	High	protein_coding_gene	UPF0658 Golgi apparatus membrane protein	None	GO:0016020, GO:0016021	84	1575	2	3	4.49872e-05	0.507324	-1.30883	UROBE1963355_EIv1.0_0009340	0.048341	0.13175	10
allind	UROBE1963355_EIv1.0_0009350	0	1	UROBE1963355_EIv1.0_0009350.1	Low	predicted_gene	Unknown protein	None	None	84	222	0	1	0	0.463964	NA	UROBE1963355_EIv1.0_0009350	0.071059	0.095414	28
allind	UROBE1963355_EIv1.0_0009360	0	1	UROBE1963355_EIv1.0_0009360.1	High	protein_coding_gene	Protein-lysine N-methyltransferase EFM3	IPR019410 (Lysine methyltransferase), IPR029063 (S-adenosyl-L-methionine-dependent methyltransferase)	GO:0008168, GO:0016740, GO:0032259	84	1089	0	1	0	0.520661	NA	UROBE1963355_EIv1.0_0009360	0.0733	0.099318	32
allind	UROBE1963355_EIv1.0_0009370	0	1	UROBE1963355_EIv1.0_0009370.1	High	protein_coding_gene	NADH-ubiquinone oxidoreductase subunit	IPR006885 (NADH dehydrogenase ubiquinone Fe-S protein 4, mitochondrial)	GO:0016651, GO:0022900	84	552	0	1	0	0.552536	NA	UROBE1963355_EIv1.0_0009370	0.098769	0.19833	11
allind	UROBE1963355_EIv1.0_0009380	0	1	UROBE1963355_EIv1.0_0009380.1	Low	transposable_element_gene	CxC1 domain-containing protein	None	None	84	546	1	2	0.000127669	0.42118	-0.774319	UROBE1963355_EIv1.0_0009380	0.067328	0.12534	29
allind	UROBE1963355_EIv1.0_0009390	0	1	UROBE1963355_EIv1.0_0009390.1	High	transposable_element_gene	CxC1 domain-containing protein	None	None	84	336	1	2	0.000140016	0.380881	-0.909084	UROBE1963355_EIv1.0_0009390	0.071013	0.12565	31
allind	UROBE1963355_EIv1.0_0009400	0	3	UROBE1963355_EIv1.0_0009400.1	High	protein_coding_gene	Chitin biosynthesis protein CHS5	IPR001357 (BRCT domain), IPR013783 (Immunoglobulin-like fold), IPR031673 (Chitin biosynthesis protein Chs5, N-terminal)	GO:0046983	84	2301	0	1	0	0.510213	NA	UROBE1963355_EIv1.0_0009400	0.0076209	0.0046682	30
allind	UROBE1963355_EIv1.0_0009410	0	1	UROBE1963355_EIv1.0_0009410.1	High	protein_coding_gene	H/ACA ribonucleoprotein complex subunit	IPR007504 (H/ACA ribonucleoprotein complex, subunit Gar1/Naf1), IPR009000 (Translation protein, beta-barrel domain)	GO:0000493, GO:0001522, GO:0003723, GO:0005732, GO:0042254	84	2853	3	4	3.31806e-05	0.500192	-1.56095	UROBE1963355_EIv1.0_0009410	0.075848	0.11165	13
allind	UROBE1963355_EIv1.0_0009420	0	1	UROBE1963355_EIv1.0_0009420.1	High	protein_coding_gene	RRM domain-containing protein	IPR012677 (Nucleotide-binding alpha-beta plait domain)	GO:0003676, GO:0003723	84	1533	2	3	3.10627e-05	0.475538	-1.40128	UROBE1963355_EIv1.0_0009420	0.14748	0.42453	21
allind	UROBE1963355_EIv1.0_0009430	0	1	UROBE1963355_EIv1.0_0009430.1	Low	predicted_gene	Unknown protein	None	None	84	204	0	1	0	0.504902	NA	UROBE1963355_EIv1.0_0009430	0.12484	0.43291	10
allind	UROBE1963355_EIv1.0_0009440	0	2	UROBE1963355_EIv1.0_0009440.1	High	protein_coding_gene	ABC transporter	IPR003439 (ABC transporter-like), IPR010929 (CDR ABC transporter), IPR013525 (ABC-2 type transporter), IPR027417 (P-loop containing nucleoside triphosphate hydrolase)	GO:0000166, GO:0005524, GO:0016020, GO:0016021, GO:0016887, GO:0042626, GO:0055085	84	4026	1	2	5.91394e-06	0.486087	-1.04726	UROBE1963355_EIv1.0_0009440	0.028423	0.0596	20
allind	UROBE1963355_EIv1.0_0009450	0	1	UROBE1963355_EIv1.0_0009450.1	Low	predicted_gene	Unknown protein	None	None	84	271	0	1	0	0.439114	NA	UROBE1963355_EIv1.0_0009450	0.020956	0.053768	7
allind	UROBE1963355_EIv1.0_0009460	0	1	UROBE1963355_EIv1.0_0009460.1	High	transposable_element_gene	Integrase catalytic domain-containing protein	None	GO:0000943, GO:0003676, GO:0015074	84	690	0	1	0	0.595652	NA	UROBE1963355_EIv1.0_0009460	0.011828	0.0027871	37
allind	UROBE1963355_EIv1.0_0009470	0	5	UROBE1963355_EIv1.0_0009470.1	High	protein_coding_gene	sn-1,2-diacylglycerol cholinephosphotransferase	IPR000462 (CDP-alcohol phosphatidyltransferase)	GO:0008654, GO:0016020, GO:0016021, GO:0016740, GO:0016780	84	1254	0	1	0	0.432217	NA	UROBE1963355_EIv1.0_0009470	0.11467	0.19713	13
allind	UROBE1963355_EIv1.0_0009480	1	1	UROBE1963355_EIv1.0_0009480.1	High	protein_coding_gene	Unknown protein	None	None	84	513	0	1	0	0.465887	NA	UROBE1963355_EIv1.0_0009480	0.091982	0.20954	19
allind	UROBE1963355_EIv1.0_0009490	0	1	UROBE1963355_EIv1.0_0009490.1	High	transposable_element_gene	Endo/exonuclease/phosphatase domain-containing protein	None	None	84	555	0	1	0	0.497297	NA	UROBE1963355_EIv1.0_0009490	0.018625	0.014443	12
allind	UROBE1963355_EIv1.0_0009500	0	2	UROBE1963355_EIv1.0_0009500.1	High	protein_coding_gene	ABC transporter domain-containing protein	IPR003439 (ABC transporter-like), IPR010929 (CDR ABC transporter), IPR013525 (ABC-2 type transporter), IPR027417 (P-loop containing nucleoside triphosphate hydrolase), IPR029481 (ABC-transporter extracellular N-terminal domain)	GO:0000166, GO:0005524, GO:0016020, GO:0016021, GO:0016887, GO:0042626, GO:0055085	84	4452	3	4	0.000174875	0.475747	0.552545	UROBE1963355_EIv1.0_0009500	0.019818	0.0081643	17
allind	UROBE1963355_EIv1.0_0009510	0	1	UROBE1963355_EIv1.0_0009510.1	Low	protein_coding_gene	Unknown protein	None	None	84	339	1	2	0.000138777	0.466077	-0.909084	UROBE1963355_EIv1.0_0009510	0.010377	-0.0056283	12
allind	UROBE1963355_EIv1.0_0009520	0	2	UROBE1963355_EIv1.0_0009520.1	High	protein_coding_gene	Kinesin-like protein	IPR001752 (Kinesin motor domain), IPR027417 (P-loop containing nucleoside triphosphate hydrolase)	GO:0000166, GO:0003774, GO:0003777, GO:0005524, GO:0005874, GO:0007018, GO:0008017	84	2220	6	7	0.000135032	0.504982	-1.73473	UROBE1963355_EIv1.0_0009520	0.02578	0.077224	45
allind	UROBE1963355_EIv1.0_0009530	0	1	UROBE1963355_EIv1.0_0009530.1	Low	protein_coding_gene	Unknown protein	None	None	84	366	1	2	0.000128539	0.505529	-0.909084	UROBE1963355_EIv1.0_0009530	0.020807	0.077807	36
allind	UROBE1963355_EIv1.0_0009540	0	1	UROBE1963355_EIv1.0_0009540.1	High	transposable_element_gene	Integrase catalytic domain-containing protein	None	None	84	567	0	1	0	0.532628	NA	UROBE1963355_EIv1.0_0009540	0.032657	0.083302	27
allind	UROBE1963355_EIv1.0_0009550	0	1	UROBE1963355_EIv1.0_0009550.1	High	transposable_element_gene	Integrase catalytic domain-containing protein	None	GO:0000943, GO:0003676, GO:0015074	84	231	0	1	0	0.549783	NA	UROBE1963355_EIv1.0_0009550	0.13608	0.34416	7
allind	UROBE1963355_EIv1.0_0009560	0	1	UROBE1963355_EIv1.0_0009560.1	Low	transposable_element_gene	Reverse transcriptase Ty1/copia-type domain-containing protein	IPR013103 (Reverse transcriptase, RNA-dependent DNA polymerase)	GO:0000943	84	816	0	1	0	0.508578	NA	UROBE1963355_EIv1.0_0009560	0.023833	0.040111	6
allind	UROBE1963355_EIv1.0_0009570	0	1	UROBE1963355_EIv1.0_0009570.1	Low	transposable_element_gene	Reverse transcriptase Ty1/copia-type domain-containing protein	None	None	84	327	1	2	7.2812e-05	0.379205	-1.04726	UROBE1963355_EIv1.0_0009570	0.059191	0.10341	16
allind	UROBE1963355_EIv1.0_0009580	0	1	UROBE1963355_EIv1.0_0009580.1	Low	transposable_element_gene	Integrase catalytic domain-containing protein	IPR012337 (Ribonuclease H-like domain)	GO:0003676, GO:0015074	84	450	0	1	0	0.446667	NA	UROBE1963355_EIv1.0_0009580	0.084439	0.15202	18
allind	UROBE1963355_EIv1.0_0009590	0	1	UROBE1963355_EIv1.0_0009590.1	Low	transposable_element_gene	Unknown protein	None	None	84	294	0	1	0	0.442177	NA	UROBE1963355_EIv1.0_0009590	0.08438	0.16096	17
allind	UROBE1963355_EIv1.0_0009600	0	1	UROBE1963355_EIv1.0_0009600.1	Low	transposable_element_gene	Unknown protein	None	None	84	276	1	2	0.000834601	0.536706	0.180974	UROBE1963355_EIv1.0_0009600	0.025229	0.060237	12
allind	UROBE1963355_EIv1.0_0009610	0	1	UROBE1963355_EIv1.0_0009610.1	High	transposable_element_gene	RNase H domain-containing protein	None	GO:0003676, GO:0004523, GO:0090502	84	276	0	1	0	0.557971	NA	UROBE1963355_EIv1.0_0009610	0.018549	0.065874	10
allind	UROBE1963355_EIv1.0_0009620	0	1	UROBE1963355_EIv1.0_0009620.1	High	protein_coding_gene	ABC transporter	IPR003439 (ABC transporter-like), IPR010929 (CDR ABC transporter), IPR013525 (ABC-2 type transporter), IPR027417 (P-loop containing nucleoside triphosphate hydrolase), IPR029481 (ABC-transporter extracellular N-terminal domain)	GO:0000166, GO:0005524, GO:0016020, GO:0016021, GO:0016887, GO:0042626, GO:0055085	84	4425	3	4	9.60744e-05	0.491348	-0.539664	UROBE1963355_EIv1.0_0009620	0.065594	0.19268	13
allind	UROBE1963355_EIv1.0_0009630	0	1	UROBE1963355_EIv1.0_0009630.1	Low	transposable_element_gene	Unknown protein	None	None	84	201	0	1	0	0.368159	NA	UROBE1963355_EIv1.0_0009630	0.013269	0.0026642	38
allind	UROBE1963355_EIv1.0_0009640	0	1	UROBE1963355_EIv1.0_0009640.1	Low	predicted_gene	Unknown protein	None	None	84	258	0	1	0	0.449612	NA	UROBE1963355_EIv1.0_0009640	0.0028897	0.0010335	79
allind	UROBE1963355_EIv1.0_0009650	0	1	UROBE1963355_EIv1.0_0009650.1	High	transposable_element_gene	Retrotransposable element Tf2 155 kDa protein type 1	None	GO:0003676, GO:0015074	84	210	1	2	0.000224025	0.461905	-0.909084	UROBE1963355_EIv1.0_0009650	0.0059822	0.0019533	79
allind	UROBE1963355_EIv1.0_0009660	0	1	UROBE1963355_EIv1.0_0009660.1	Low	protein_coding_gene	Unknown protein	None	None	84	318	0	1	0	0.487421	NA	UROBE1963355_EIv1.0_0009660	0.070364	0.082971	11
allind	UROBE1963355_EIv1.0_0009670	0	1	UROBE1963355_EIv1.0_0009670.1	High	protein_coding_gene	Unknown protein	None	None	84	720	0	1	0	0.595833	NA	UROBE1963355_EIv1.0_0009670	0.078989	0.085029	10
allind	UROBE1963355_EIv1.0_0009680	0	3	UROBE1963355_EIv1.0_0009680.1	Low	protein_coding_gene	Kinesin	IPR001752 (Kinesin motor domain), IPR027417 (P-loop containing nucleoside triphosphate hydrolase)	GO:0000166, GO:0003774, GO:0003777, GO:0005524, GO:0007018, GO:0008017	84	279	0	1	0	0.487455	NA	UROBE1963355_EIv1.0_0009680	0.062182	0.080408	10
allind	UROBE1963355_EIv1.0_0009690	0	1	UROBE1963355_EIv1.0_0009690.1	Low	protein_coding_gene	Kinesin-like protein Klp8	None	None	84	276	0	1	0	0.398551	NA	UROBE1963355_EIv1.0_0009690	0.05071	0.053008	11
allind	UROBE1963355_EIv1.0_0009700	0	1	UROBE1963355_EIv1.0_0009700.1	Low	predicted_gene	Unknown protein	None	None	84	238	0	1	0	0.445378	NA	UROBE1963355_EIv1.0_0009700	0.035096	0.036342	74
allind	UROBE1963355_EIv1.0_0009710	0	1	UROBE1963355_EIv1.0_0009710.1	High	protein_coding_gene	Integrase catalytic domain-containing protein	None	GO:0000943, GO:0003676, GO:0015074	84	714	0	1	0	0.44958	NA	UROBE1963355_EIv1.0_0009710	0.02453	0.020149	20
allind	UROBE1963355_EIv1.0_0009720	0	1	UROBE1963355_EIv1.0_0009720.1	High	transposable_element_gene	Unknown protein	None	None	84	176	0	1	0	0.488636	NA	UROBE1963355_EIv1.0_0009720	0.022346	0.041534	24
allind	UROBE1963355_EIv1.0_0009730	0	1	UROBE1963355_EIv1.0_0009730.1	High	transposable_element_gene	Integrase catalytic domain-containing protein	IPR012337 (Ribonuclease H-like domain)	GO:0000943, GO:0003676, GO:0015074	84	1482	0	1	0	0.485155	NA	UROBE1963355_EIv1.0_0009730	0.029504	0.043603	32
allind	UROBE1963355_EIv1.0_0009740	0	1	UROBE1963355_EIv1.0_0009740.1	High	transposable_element_gene	Integrase catalytic domain-containing protein	None	GO:0000943, GO:0003676, GO:0015074	84	672	1	2	3.54308e-05	0.517839	-1.04726	UROBE1963355_EIv1.0_0009740	0.038502	0.072366	21
allind	UROBE1963355_EIv1.0_0009750	0	1	UROBE1963355_EIv1.0_0009750.1	High	transposable_element_gene	Integrase catalytic domain-containing protein	None	GO:0000943, GO:0003676, GO:0015074	84	645	0	1	0	0.51783	NA	UROBE1963355_EIv1.0_0009750	0.084343	0.12419	8
allind	UROBE1963355_EIv1.0_0009760	0	1	UROBE1963355_EIv1.0_0009760.1	High	transposable_element_gene	Integrase catalytic domain-containing protein	None	GO:0000943, GO:0003676, GO:0015074	84	888	1	2	2.68125e-05	0.515766	-1.04726	UROBE1963355_EIv1.0_0009760	0.058064	0.14897	10
allind	UROBE1963355_EIv1.0_0009770	0	1	UROBE1963355_EIv1.0_0009770.1	High	transposable_element_gene	Integrase catalytic domain-containing protein	IPR012337 (Ribonuclease H-like domain), IPR013103 (Reverse transcriptase, RNA-dependent DNA polymerase)	GO:0000943, GO:0003676, GO:0015074	84	1881	0	1	0	0.460393	NA	UROBE1963355_EIv1.0_0009770	0.13418	0.35288	21
allind	UROBE1963355_EIv1.0_0009780	0	1	UROBE1963355_EIv1.0_0009780.1	Low	transposable_element_gene	Unknown protein	None	None	84	237	0	1	0	0.464135	NA	UROBE1963355_EIv1.0_0009780	0.042181	0.051061	26
allind	UROBE1963355_EIv1.0_0009790	0	2	UROBE1963355_EIv1.0_0009790.1	High	protein_coding_gene	PB1 domain-containing protein	IPR000270 (PB1 domain)	None	84	2112	3	4	4.48221e-05	0.547349	-1.56095	UROBE1963355_EIv1.0_0009790	0.042016	0.075552	30
allind	UROBE1963355_EIv1.0_0009800	0	1	UROBE1963355_EIv1.0_0009800.1	High	protein_coding_gene	Pectinesterase	IPR011050 (Pectin lyase fold/virulence factor)	GO:0005576, GO:0005618, GO:0016787, GO:0030599, GO:0042545, GO:0045330, GO:0045490, GO:0071555	84	1188	1	2	0.000236637	0.47124	0.482915	UROBE1963355_EIv1.0_0009800	0.080195	0.14654	19
allind	UROBE1963355_EIv1.0_0009810	0	1	UROBE1963355_EIv1.0_0009810.1	Low	predicted_gene	Unknown protein	None	None	84	235	0	1	0	0.408511	NA	UROBE1963355_EIv1.0_0009810	0.047866	0.090996	17
allind	UROBE1963355_EIv1.0_0009820	0	5	UROBE1963355_EIv1.0_0009820.1	High	protein_coding_gene	Unplaced genomic scaffold SPHSTscaffold_55, whole genome shotgun sequence	None	GO:0016020, GO:0016021	84	885	4	5	0.00188648	0.539387	2.22496	UROBE1963355_EIv1.0_0009820	0.057807	0.10436	19
allind	UROBE1963355_EIv1.0_0009830	0	1	UROBE1963355_EIv1.0_0009830.1	Low	transposable_element_gene	Unknown protein	None	None	84	252	0	1	0	0.349206	NA	UROBE1963355_EIv1.0_0009830	0.16329	0.2374	6
allind	UROBE1963355_EIv1.0_0009840	0	1	UROBE1963355_EIv1.0_0009840.1	Low	transposable_element_gene	Unknown protein	None	None	84	168	1	2	0.00126356	0.393566	0.073503	UROBE1963355_EIv1.0_0009840	0.048113	0.077495	25
allind	UROBE1963355_EIv1.0_0009850	0	1	UROBE1963355_EIv1.0_0009850.1	High	transposable_element_gene	Integrase catalytic domain-containing protein	None	GO:0000943, GO:0003676, GO:0015074	84	687	1	2	0.000432172	0.595082	0.576738	UROBE1963355_EIv1.0_0009850	0.071221	0.16636	21
allind	UROBE1963355_EIv1.0_0009860	0	3	UROBE1963355_EIv1.0_0009860.1	Low	transposable_element_gene	Unknown protein	None	None	84	531	2	3	8.96781e-05	0.489665	-1.40128	UROBE1963355_EIv1.0_0009860	0.067268	0.075333	62
allind	UROBE1963355_EIv1.0_0009870	0	9	UROBE1963355_EIv1.0_0009870.1	High	protein_coding_gene	CCHC-type domain-containing protein	None	GO:0003676, GO:0008270	84	624	1	2	0.000247786	0.5207	-0.269379	UROBE1963355_EIv1.0_0009870	0.16865	0.35556	22
allind	UROBE1963355_EIv1.0_0009880	0	2	UROBE1963355_EIv1.0_0009880.1	Low	predicted_gene	Unknown protein	None	None	84	369	0	1	0	0.476965	NA	UROBE1963355_EIv1.0_0009880	0.27627	0.48725	27
allind	UROBE1963355_EIv1.0_0009890	0	1	UROBE1963355_EIv1.0_0009890.1	Low	transposable_element_gene	Unknown protein	None	None	84	240	0	1	0	0.325	NA	UROBE1963355_EIv1.0_0009890	0.13197	0.47884	19
allind	UROBE1963355_EIv1.0_0009900	0	1	UROBE1963355_EIv1.0_0009900.1	High	protein_coding_gene	G-patch domain-containing protein	IPR000467 (G-patch domain), IPR022159 (Tuftelin interacting protein, N-terminal domain), IPR022783 (GC-rich sequence DNA-binding factor domain)	GO:0003676	84	3126	3	4	4.49655e-05	0.466746	-1.41911	UROBE1963355_EIv1.0_0009900	0.052213	0.081937	32
allind	UROBE1963355_EIv1.0_0009910	0	1	UROBE1963355_EIv1.0_0009910.1	Low	transposable_element_gene	Unknown protein	None	None	84	207	0	1	0	0.487923	NA	UROBE1963355_EIv1.0_0009910	0.056484	0.07138	27
allind	UROBE1963355_EIv1.0_0009920	0	1	UROBE1963355_EIv1.0_0009920.1	High	transposable_element_gene	Retrotransposable element	None	GO:0003676, GO:0015074	84	366	0	1	0	0.401639	NA	UROBE1963355_EIv1.0_0009920	0.066009	0.16264	35
allind	UROBE1963355_EIv1.0_0009930	0	1	UROBE1963355_EIv1.0_0009930.1	Low	predicted_gene	Unknown protein	None	None	84	204	0	1	0	0.47549	NA	UROBE1963355_EIv1.0_0009930	0.11843	0.24686	12
allind	UROBE1963355_EIv1.0_0009940	0	2	UROBE1963355_EIv1.0_0009940.1	High	protein_coding_gene	Exocyst complex component Sec10-like protein	IPR009976 (Exocyst complex component Sec10-like)	GO:0000145, GO:0005737, GO:0006887, GO:0048278	84	2595	1	2	2.68622e-05	0.474388	-0.774319	UROBE1963355_EIv1.0_0009940	0.068326	0.20365	17
allind	UROBE1963355_EIv1.0_0009950	0	1	UROBE1963355_EIv1.0_0009950.1	Low	transposable_element_gene	Unknown protein	None	None	84	210	0	1	0	0.438095	NA	UROBE1963355_EIv1.0_0009950	0.047626	0.14432	27
allind	UROBE1963355_EIv1.0_0009960	0	1	UROBE1963355_EIv1.0_0009960.1	Low	transposable_element_gene	Unknown protein	None	None	84	252	1	2	0.000364269	0.420824	-0.642967	UROBE1963355_EIv1.0_0009960	0.094474	0.23573	23
allind	UROBE1963355_EIv1.0_0009970	0	1	UROBE1963355_EIv1.0_0009970.1	High	protein_coding_gene	Secreted protein	None	None	84	831	1	2	8.38838e-05	0.513839	-0.774319	UROBE1963355_EIv1.0_0009970	0.040444	0.046274	41
allind	UROBE1963355_EIv1.0_0009980	0	1	UROBE1963355_EIv1.0_0009980.1	High	protein_coding_gene	Secreted protein	None	None	84	828	0	1	0	0.478261	NA	UROBE1963355_EIv1.0_0009980	0.057308	0.078968	39
allind	UROBE1963355_EIv1.0_0009990	0	4	UROBE1963355_EIv1.0_0009990.1	High	protein_coding_gene	Endonuclease III homolog	IPR011257 (DNA glycosylase), IPR023170 (Helix-turn-helix, base-excision DNA repair, C-terminal)	GO:0000703, GO:0003677, GO:0003824, GO:0003906, GO:0004519, GO:0005634, GO:0005739, GO:0006281, GO:0006284, GO:0006285, GO:0006974, GO:0008152, GO:0016787, GO:0016798, GO:0016829, GO:0019104, GO:0046872, GO:0051536, GO:0051539, GO:0090305, GO:0140078	84	1458	2	3	0.000281353	0.453924	0.041287	UROBE1963355_EIv1.0_0009990	0.056159	0.11026	53
allind	UROBE1963355_EIv1.0_0010000	0	1	UROBE1963355_EIv1.0_0010000.1	High	transposable_element_gene	Integrase catalytic domain-containing protein	None	GO:0000943, GO:0003676, GO:0015074	84	561	1	2	0.000124256	0.399351	-0.774319	UROBE1963355_EIv1.0_0010000	0.054996	0.11088	55
allind	UROBE1963355_EIv1.0_0010010	0	3	UROBE1963355_EIv1.0_0010010.1	High	transposable_element_gene	Reverse transcriptase Ty1/copia-type domain-containing protein	None	None	84	912	0	1	0	0.400219	NA	UROBE1963355_EIv1.0_0010010	0.16407	0.38868	25
allind	UROBE1963355_EIv1.0_0010020	0	1	UROBE1963355_EIv1.0_0010020.1	High	transposable_element_gene	Integrase catalytic domain-containing protein	None	None	84	1044	0	1	0	0.5	NA	UROBE1963355_EIv1.0_0010020	0.21191	0.51664	13
allind	UROBE1963355_EIv1.0_0010030	0	1	UROBE1963355_EIv1.0_0010030.1	High	transposable_element_gene	Integrase catalytic domain-containing protein	None	GO:0000943, GO:0003676, GO:0015074	84	228	0	1	0	0.429825	NA	UROBE1963355_EIv1.0_0010030	0.19341	0.38929	17
allind	UROBE1963355_EIv1.0_0010040	0	4	UROBE1963355_EIv1.0_0010040.1	High	protein_coding_gene	CAP-Gly domain-containing protein	IPR000938 (CAP Gly-rich domain), IPR029071 (Ubiquitin-related domain)	None	84	825	0	1	0	0.426667	NA	UROBE1963355_EIv1.0_0010040	0.1677	0.41055	20
allind	UROBE1963355_EIv1.0_0010050	0	1	UROBE1963355_EIv1.0_0010050.1	High	transposable_element_gene	Integrase catalytic domain-containing protein	None	GO:0000943, GO:0003676, GO:0015074	84	837	0	1	0	0.535245	NA	UROBE1963355_EIv1.0_0010050	0.17609	0.57327	8
allind	UROBE1963355_EIv1.0_0010060	0	1	UROBE1963355_EIv1.0_0010060.1	High	transposable_element_gene	Integrase catalytic domain-containing protein	None	GO:0000943, GO:0003676, GO:0015074	84	870	0	1	0	0.483908	NA	UROBE1963355_EIv1.0_0010060	0.10926	0.37324	13
allind	UROBE1963355_EIv1.0_0010070	0	1	UROBE1963355_EIv1.0_0010070.1	High	transposable_element_gene	Dimer_Tnp_hAT domain-containing protein	None	None	84	585	0	1	0	0.494017	NA	UROBE1963355_EIv1.0_0010070	0.10085	0.26772	43
allind	UROBE1963355_EIv1.0_0010080	0	6	UROBE1963355_EIv1.0_0010080.1	High	protein_coding_gene	Glyco_hydro_15 domain-containing protein	IPR008928 (Six-hairpin glycosidase-like), IPR011613 (Glycoside hydrolase family 15/Phosphorylase b kinase regulatory chain family)	GO:0003824	84	1734	0	1	0	0.497117	NA	UROBE1963355_EIv1.0_0010080	0.16693	0.22828	68
allind	UROBE1963355_EIv1.0_0010090	0	1	UROBE1963355_EIv1.0_0010090.1	Low	transposable_element_gene	Unknown protein	None	None	70	249	15	15	0.0125205	0.518416	0.004327	UROBE1963355_EIv1.0_0010090	0.22073	0.25955	46
allind	UROBE1963355_EIv1.0_0010100	0	3	UROBE1963355_EIv1.0_0010100.1	High	protein_coding_gene	U3 small nucleolar RNA-associated protein 22	IPR005554 (Nrap protein)	GO:0003723, GO:0005634, GO:0005730, GO:0006364, GO:0042254	84	3384	0	1	0	0.460106	NA	UROBE1963355_EIv1.0_0010100	0.039435	0.072266	8
allind	UROBE1963355_EIv1.0_0010110	0	1	UROBE1963355_EIv1.0_0010110.1	Low	predicted_gene	Unknown protein	None	None	84	215	0	1	0	0.483721	NA	UROBE1963355_EIv1.0_0010110	0.0072299	0.038185	6
allind	UROBE1963355_EIv1.0_0010120	0	1	UROBE1963355_EIv1.0_0010120.1	High	protein_coding_gene	Phosphoribosylaminoimidazole-succinocarboxamide synthase	IPR001636 (Phosphoribosylaminoimidazole-succinocarboxamide synthase), IPR028923 (SAICAR synthetase/ADE2, N-terminal)	GO:0004639, GO:0006106, GO:0006164, GO:0006189, GO:0009152, GO:0046084	84	924	2	3	0.000101209	0.496792	-1.21867	UROBE1963355_EIv1.0_0010120	0.033016	0.068483	7
allind	UROBE1963355_EIv1.0_0010130	0	2	UROBE1963355_EIv1.0_0010130.1	High	protein_coding_gene	Glucosamine 6-phosphate N-acetyltransferase	IPR016181 (Acyl-CoA N-acyltransferase)	GO:0004343, GO:0006048	84	570	0	1	0	0.489474	NA	UROBE1963355_EIv1.0_0010130	0.033016	0.068483	7
allind	UROBE1963355_EIv1.0_0010140	0	1	UROBE1963355_EIv1.0_0010140.1	High	protein_coding_gene	PX domain-containing protein	IPR001683 (Phox homologous domain)	GO:0035091	84	3294	3	4	8.71732e-05	0.503629	-0.966087	UROBE1963355_EIv1.0_0010140	0.10085	0.39923	12
allind	UROBE1963355_EIv1.0_0010150	0	1	UROBE1963355_EIv1.0_0010150.1	High	protein_coding_gene	Cytochrome c oxidase subunit 9, mitochondrial	IPR014368 (Cytochrome c oxidase, subunit VIIa, fungal)	GO:0004129, GO:0005739, GO:0005743, GO:0005746, GO:0016020, GO:0016021, GO:0016491, GO:0022904, GO:0055114, GO:1902600	84	183	0	1	0	0.508197	NA	UROBE1963355_EIv1.0_0010150	0.32268	0.69458	8
allind	UROBE1963355_EIv1.0_0010160	0	1	UROBE1963355_EIv1.0_0010160.1	High	transposable_element_gene	Integrase catalytic domain-containing protein	None	GO:0000943, GO:0003676, GO:0015074	84	852	1	2	0.000566653	0.464328	1.68215	UROBE1963355_EIv1.0_0010160	0.12022	0.26327	27
allind	UROBE1963355_EIv1.0_0010170	0	1	UROBE1963355_EIv1.0_0010170.1	Low	predicted_gene	Unknown protein	None	None	84	594	1	2	0.000728262	0.5483	1.38362	UROBE1963355_EIv1.0_0010170	0.1394	0.2127	13
allind	UROBE1963355_EIv1.0_0010180	0	6	UROBE1963355_EIv1.0_0010180.1	High	protein_coding_gene	Cyclin N-terminal domain-containing protein	IPR013763 (Cyclin-like)	GO:0005634	84	1881	1	2	0.000234705	0.494779	1.4365	UROBE1963355_EIv1.0_0010180	0.10573	0.18983	17
allind	UROBE1963355_EIv1.0_0010190	0	2	UROBE1963355_EIv1.0_0010190.1	High	protein_coding_gene	Ubiquitin-conjugating enzyme E2 6	IPR016135 (Ubiquitin-conjugating enzyme/RWD-like)	None	84	735	0	1	0	0.557823	NA	UROBE1963355_EIv1.0_0010190	-0.00029159	-0.0052049	12
allind	UROBE1963355_EIv1.0_0010200	0	2	UROBE1963355_EIv1.0_0010200.1	High	protein_coding_gene	Unknown protein	None	None	84	1770	2	3	2.69034e-05	0.512994	-1.40128	UROBE1963355_EIv1.0_0010200	0.10846	0.46079	12
allind	UROBE1963355_EIv1.0_0010210	0	1	UROBE1963355_EIv1.0_0010210.1	Low	predicted_gene	Unknown protein	None	None	84	420	0	1	0	0.490476	NA	UROBE1963355_EIv1.0_0010210	0.18028	0.52687	11
allind	UROBE1963355_EIv1.0_0010220	0	1	UROBE1963355_EIv1.0_0010220.1	High	transposable_element_gene	Integrase catalytic domain-containing protein	None	GO:0000943, GO:0003676, GO:0015074	84	1026	1	2	4.58531e-05	0.462012	-0.909084	UROBE1963355_EIv1.0_0010220	0.22269	0.64078	15
allind	UROBE1963355_EIv1.0_0010230	0	1	UROBE1963355_EIv1.0_0010230.1	Low	transposable_element_gene	Unknown protein	None	None	84	165	1	2	0.00189155	0.551515	0.66715	UROBE1963355_EIv1.0_0010230	0.16623	0.51833	22
allind	UROBE1963355_EIv1.0_0010240	0	1	UROBE1963355_EIv1.0_0010240.1	Low	transposable_element_gene	Unknown protein	None	None	84	246	0	1	0	0.682927	NA	UROBE1963355_EIv1.0_0010240	0.15646	0.51471	22
allind	UROBE1963355_EIv1.0_0010250	0	1	UROBE1963355_EIv1.0_0010250.1	High	transposable_element_gene	Integrase catalytic domain-containing protein	IPR025314 (Domain of unknown function DUF4219)	GO:0000943, GO:0003676, GO:0015074	84	396	0	1	0	0.426768	NA	UROBE1963355_EIv1.0_0010250	0.075749	0.36765	15
allind	UROBE1963355_EIv1.0_0010260	0	3	UROBE1963355_EIv1.0_0010260.1	High	transposable_element_gene	Integrase catalytic domain-containing protein	None	GO:0000943, GO:0003676, GO:0015074	84	984	1	2	2.41967e-05	0.444094	-1.04726	UROBE1963355_EIv1.0_0010260	0.169	0.47442	50
allind	UROBE1963355_EIv1.0_0010270	0	1	UROBE1963355_EIv1.0_0010270.1	High	transposable_element_gene	Integrase catalytic domain-containing protein	None	None	84	1032	0	1	0	0.468023	NA	UROBE1963355_EIv1.0_0010270	0.080987	0.15272	65
allind	UROBE1963355_EIv1.0_0010280	0	1	UROBE1963355_EIv1.0_0010280.1	Low	transposable_element_gene	Integrase catalytic domain-containing protein	None	GO:0000943, GO:0003676, GO:0015074	84	375	0	1	0	0.538667	NA	UROBE1963355_EIv1.0_0010280	0.043295	0.08147	56
allind	UROBE1963355_EIv1.0_0010290	0	2	UROBE1963355_EIv1.0_0010290.1	High	protein_coding_gene	Fructose-bisphosphate aldolase	IPR000771 (Fructose-bisphosphate aldolase, class-II), IPR013785 (Aldolase-type TIM barrel)	GO:0003824, GO:0004332, GO:0005829, GO:0005886, GO:0005975, GO:0006094, GO:0006096, GO:0008270, GO:0009277, GO:0016832	84	1080	0	1	0	0.494444	NA	UROBE1963355_EIv1.0_0010290	0.039993	0.12657	97
allind	UROBE1963355_EIv1.0_0010300	0	1	UROBE1963355_EIv1.0_0010300.1	High	transposable_element_gene	DDE_3 domain-containing protein	None	GO:0003677	84	399	4	5	0.00461998	0.461153	2.66961	UROBE1963355_EIv1.0_0010300	0.062652	0.20215	69
allind	UROBE1963355_EIv1.0_0010310	0	1	UROBE1963355_EIv1.0_0010310.1	High	protein_coding_gene	Family 2 glycoside hydrolase	IPR008979 (Galactose-binding domain-like), IPR013812 (Glycoside hydrolase, family 2/20, immunoglobulin-like beta-sandwich domain), IPR017853 (Glycoside hydrolase superfamily)	GO:0016787	84	3111	1	2	7.65333e-06	0.476696	-1.04726	UROBE1963355_EIv1.0_0010310	0.29852	0.61233	24
allind	UROBE1963355_EIv1.0_0010320	0	2	UROBE1963355_EIv1.0_0010320.1	High	protein_coding_gene	Aminotran_1_2 domain-containing protein	IPR015424 (Pyridoxal phosphate-dependent transferase)	GO:0003824, GO:0009058, GO:0030170	84	1347	0	1	0	0.507795	NA	UROBE1963355_EIv1.0_0010320	0.45176	0.6922	5
allind	UROBE1963355_EIv1.0_0010330	0	1	UROBE1963355_EIv1.0_0010330.1	Low	protein_coding_gene	Unknown protein	None	None	84	216	0	1	0	0.50463	NA	UROBE1963355_EIv1.0_0010330	0.58711	0.70122	5
allind	UROBE1963355_EIv1.0_0010340	0	1	UROBE1963355_EIv1.0_0010340.1	High	transposable_element_gene	Transposable element tc3 transposase	None	GO:0003677, GO:0006313, GO:0015074	84	615	0	1	0	0.528455	NA	UROBE1963355_EIv1.0_0010340	0.47195	0.64085	11
allind	UROBE1963355_EIv1.0_0010350	0	2	UROBE1963355_EIv1.0_0010350.1	High	transposable_element_gene	Integrase catalytic domain-containing protein	IPR025724 (GAG-pre-integrase domain)	GO:0003676, GO:0008270, GO:0015074	84	1464	1	2	3.21348e-05	0.46518	-0.909084	UROBE1963355_EIv1.0_0010350	0.48634	0.66579	18
allind	UROBE1963355_EIv1.0_0010360	0	1	UROBE1963355_EIv1.0_0010360.1	Low	transposable_element_gene	Reverse transcriptase Ty1/copia-type domain-containing protein	IPR013103 (Reverse transcriptase, RNA-dependent DNA polymerase)	None	84	312	0	1	0	0.464744	NA	UROBE1963355_EIv1.0_0010360	0.48367	0.66192	18
allind	UROBE1963355_EIv1.0_0010370	0	1	UROBE1963355_EIv1.0_0010370.1	High	protein_coding_gene	Protein kinase domain-containing protein	IPR011009 (Protein kinase-like domain)	None	84	5469	1	2	4.35354e-06	0.536481	-1.04726	UROBE1963355_EIv1.0_0010370	0.065302	0.057946	31
allind	UROBE1963355_EIv1.0_0010380	0	2	UROBE1963355_EIv1.0_0010380.1	High	transposable_element_gene	Integrase catalytic domain-containing protein	IPR013103 (Reverse transcriptase, RNA-dependent DNA polymerase)	None	84	795	0	1	0	0.450315	NA	UROBE1963355_EIv1.0_0010380	0.21582	0.30583	13
allind	UROBE1963355_EIv1.0_0010390	0	1	UROBE1963355_EIv1.0_0010390.1	High	transposable_element_gene	Integrase catalytic domain-containing protein	None	GO:0000943, GO:0003676, GO:0015074	84	696	0	1	0	0.432471	NA	UROBE1963355_EIv1.0_0010390	0.2176	0.30901	13
allind	UROBE1963355_EIv1.0_0010400	0	3	UROBE1963355_EIv1.0_0010400.1	High	protein_coding_gene	Carbohydrate-binding module family 13 protein	None	None	84	825	0	1	0	0.533333	NA	UROBE1963355_EIv1.0_0010400	0.093374	0.23432	14
allind	UROBE1963355_EIv1.0_0010410	0	1	UROBE1963355_EIv1.0_0010410.1	Low	protein_coding_gene	Unknown protein	None	None	84	306	0	1	0	0.526144	NA	UROBE1963355_EIv1.0_0010410	0.1494	0.28798	10
allind	UROBE1963355_EIv1.0_0010420	0	1	UROBE1963355_EIv1.0_0010420.1	Low	transposable_element_gene	Unknown protein	None	None	84	256	0	1	0	0.386719	NA	UROBE1963355_EIv1.0_0010420	0.021203	0.027578	122
allind	UROBE1963355_EIv1.0_0010430	0	2	UROBE1963355_EIv1.0_0010430.1	High	protein_coding_gene	t-SNARE coiled-coil homology domain-containing protein	IPR010989 (SNARE)	GO:0000149, GO:0005484, GO:0005886, GO:0006886, GO:0006887, GO:0006906, GO:0012505, GO:0016020, GO:0016021, GO:0016192, GO:0031201, GO:0048278	84	1236	0	1	0	0.544498	NA	UROBE1963355_EIv1.0_0010430	0.024941	0.027767	40
allind	UROBE1963355_EIv1.0_0010440	0	1	UROBE1963355_EIv1.0_0010440.1	Low	protein_coding_gene	Unknown protein	None	None	84	1080	0	1	0	0.496296	NA	UROBE1963355_EIv1.0_0010440	-0.0073658	-0.0088956	27
allind	UROBE1963355_EIv1.0_0010450	0	2	UROBE1963355_EIv1.0_0010450.1	Low	predicted_gene	Unknown protein	None	None	84	264	0	1	0	0.511364	NA	UROBE1963355_EIv1.0_0010450	-0.0070031	-0.0074577	23
allind	UROBE1963355_EIv1.0_0010460	0	1	UROBE1963355_EIv1.0_0010460.1	High	transposable_element_gene	Integrase catalytic domain-containing protein	IPR013103 (Reverse transcriptase, RNA-dependent DNA polymerase)	GO:0000943, GO:0003676, GO:0008270, GO:0015074	84	1026	1	2	4.58531e-05	0.518518	-0.909084	UROBE1963355_EIv1.0_0010460	0.14401	0.19382	11
allind	UROBE1963355_EIv1.0_0010470	0	2	UROBE1963355_EIv1.0_0010470.1	High	protein_coding_gene	Nadh:ubiquinone oxidoreductase subunit	None	None	84	324	1	2	0.00109344	0.456092	0.917915	UROBE1963355_EIv1.0_0010470	0.20663	0.57709	11
allind	UROBE1963355_EIv1.0_0010480	0	1	UROBE1963355_EIv1.0_0010480.1	Low	predicted_gene	Unknown protein	None	None	84	279	1	2	8.53388e-05	0.458739	-1.04726	UROBE1963355_EIv1.0_0010480	0.17765	0.5643	12
allind	UROBE1963355_EIv1.0_0010490	0	1	UROBE1963355_EIv1.0_0010490.1	Low	transposable_element_gene	Unknown protein	None	None	84	381	0	1	0	0.456693	NA	UROBE1963355_EIv1.0_0010490	0.2061	0.57737	10
allind	UROBE1963355_EIv1.0_0010500	0	2	UROBE1963355_EIv1.0_0010500.1	High	protein_coding_gene	Trafficking protein particle complex subunit	IPR007233 (Trafficking protein particle complex subunit)	None	84	735	0	1	0	0.444898	NA	UROBE1963355_EIv1.0_0010500	0.052958	0.10235	16
allind	UROBE1963355_EIv1.0_0010510	0	1	UROBE1963355_EIv1.0_0010510.1	High	transposable_element_gene	Reverse transcriptase Ty1/copia-type domain-containing protein	None	None	84	1308	1	2	1.8203e-05	0.5	-1.04726	UROBE1963355_EIv1.0_0010510	0.066689	0.10756	19
allind	UROBE1963355_EIv1.0_0010520	0	1	UROBE1963355_EIv1.0_0010520.1	High	transposable_element_gene	Integrase catalytic domain-containing protein	None	GO:0000943, GO:0003676, GO:0015074	84	741	0	1	0	0.622132	NA	UROBE1963355_EIv1.0_0010520	0.0012284	-0.0011305	21
allind	UROBE1963355_EIv1.0_0010530	0	3	UROBE1963355_EIv1.0_0010530.1	High	protein_coding_gene	zf-4CXXC_R1 domain-containing protein	IPR018866 (Zinc-finger domain of monoamine-oxidase A repressor R1)	GO:0006355	84	2931	1	2	8.12334e-06	0.451045	-1.04726	UROBE1963355_EIv1.0_0010530	0.08494	0.17756	30
allind	UROBE1963355_EIv1.0_0010540	0	1	UROBE1963355_EIv1.0_0010540.1	Low	predicted_gene	Unknown protein	None	None	84	234	0	1	0	0.41453	NA	UROBE1963355_EIv1.0_0010540	0.20403	0.47175	9
allind	UROBE1963355_EIv1.0_0010550	0	1	UROBE1963355_EIv1.0_0010550.1	High	transposable_element_gene	Reverse transcriptase Ty1/copia-type domain-containing protein	None	GO:0000943	84	449	0	1	0	0.432071	NA	UROBE1963355_EIv1.0_0010550	0.051444	0.094372	20
allind	UROBE1963355_EIv1.0_0010560	0	1	UROBE1963355_EIv1.0_0010560.1	High	transposable_element_gene	Integrase catalytic domain-containing protein	None	GO:0000943, GO:0003676, GO:0015074	84	777	0	1	0	0.487774	NA	UROBE1963355_EIv1.0_0010560	0.086087	0.29269	9
allind	UROBE1963355_EIv1.0_0010570	0	1	UROBE1963355_EIv1.0_0010570.1	Low	predicted_gene	Unknown protein	None	None	84	270	1	2	0.000419668	0.414815	-0.515026	UROBE1963355_EIv1.0_0010570	0.10516	0.21964	16
allind	UROBE1963355_EIv1.0_0010580	0	1	UROBE1963355_EIv1.0_0010580.1	High	protein_coding_gene	Proteasome complex subunit Sem1	IPR007834 (DSS1/SEM1)	None	84	384	0	1	0	0.515625	NA	UROBE1963355_EIv1.0_0010580	0.10095	0.21006	18
allind	UROBE1963355_EIv1.0_0010590	0	1	UROBE1963355_EIv1.0_0010590.1	High	transposable_element_gene	BZ3500_MvSof-1268-A1- protein	None	None	84	402	0	1	0	0.50995	NA	UROBE1963355_EIv1.0_0010590	0.031264	0.054418	26
allind	UROBE1963355_EIv1.0_0010600	0	1	UROBE1963355_EIv1.0_0010600.1	High	protein_coding_gene	CCHC-type domain-containing protein	None	None	84	351	0	1	0	0.478633	NA	UROBE1963355_EIv1.0_0010600	0.023619	0.029544	59
allind	UROBE1963355_EIv1.0_0010610	0	1	UROBE1963355_EIv1.0_0010610.1	High	protein_coding_gene	CCHC-type domain-containing protein	None	None	84	477	0	1	0	0.549266	NA	UROBE1963355_EIv1.0_0010610	0.025487	0.037726	62
allind	UROBE1963355_EIv1.0_0010620	0	1	UROBE1963355_EIv1.0_0010620.1	High	transposable_element_gene	Integrase catalytic domain-containing protein	None	None	84	606	0	1	0	0.513201	NA	UROBE1963355_EIv1.0_0010620	0.16492	0.36278	15
allind	UROBE1963355_EIv1.0_0010630	0	1	UROBE1963355_EIv1.0_0010630.1	Low	transposable_element_gene	BZ3500_MvSof-1268-A1- protein	IPR012337 (Ribonuclease H-like domain)	GO:0000943, GO:0003676, GO:0015074	84	300	0	1	0	0.38	NA	UROBE1963355_EIv1.0_0010630	0.11376	0.37552	13
allind	UROBE1963355_EIv1.0_0010640	0	4	UROBE1963355_EIv1.0_0010640.1	High	protein_coding_gene	C2H2-type domain-containing protein	IPR000504 (RNA recognition motif domain), IPR007042 (Arsenite-resistance protein 2), IPR021933 (Protein of unknown function DUF3546), IPR025239 (Domain of unknown function DUF4187)	GO:0003676, GO:0006397	84	2949	1	2	8.07376e-06	0.513398	-1.04726	UROBE1963355_EIv1.0_0010640	0.073733	0.15228	35
allind	UROBE1963355_EIv1.0_0010650	0	1	UROBE1963355_EIv1.0_0010650.1	Low	predicted_gene	Unknown protein	None	None	84	228	2	3	0.000310767	0.469246	-1.30883	UROBE1963355_EIv1.0_0010650	0.070852	0.13936	30
allind	UROBE1963355_EIv1.0_0010660	0	1	UROBE1963355_EIv1.0_0010660.1	High	transposable_element_gene	Integrase catalytic domain-containing protein	None	GO:0000943, GO:0003676, GO:0015074	84	402	0	1	0	0.440298	NA	UROBE1963355_EIv1.0_0010660	0.11297	0.39324	22
allind	UROBE1963355_EIv1.0_0010670	0	3	UROBE1963355_EIv1.0_0010670.1	High	transposable_element_gene	Leucine-zipper-like transcriptional regulator 1	None	None	84	777	2	4	0.000893074	0.530199	1.17	UROBE1963355_EIv1.0_0010670	0.074396	0.28995	11
allind	UROBE1963355_EIv1.0_0010680	0	2	UROBE1963355_EIv1.0_0010680.1	High	transposable_element_gene	Integrase catalytic domain-containing protein	None	GO:0000943, GO:0003676, GO:0015074	84	597	0	1	0	0.425461	NA	UROBE1963355_EIv1.0_0010680	0.11065	0.21434	18
allind	UROBE1963355_EIv1.0_0010690	0	1	UROBE1963355_EIv1.0_0010690.1	Low	predicted_gene	Unknown protein	None	None	84	162	0	1	0	0.469136	NA	UROBE1963355_EIv1.0_0010690	0.14119	0.35657	7
allind	UROBE1963355_EIv1.0_0010700	0	1	UROBE1963355_EIv1.0_0010700.1	High	protein_coding_gene	LIM zinc-binding domain-containing protein	IPR001781 (Zinc finger, LIM-type)	None	84	2289	1	2	1.04017e-05	0.536047	-1.04726	UROBE1963355_EIv1.0_0010700	0.21041	0.32428	19
allind	UROBE1963355_EIv1.0_0010710	0	1	UROBE1963355_EIv1.0_0010710.1	Low	predicted_gene	Unknown protein	None	None	84	144	0	1	0	0.423611	NA	UROBE1963355_EIv1.0_0010710	0.23027	0.30542	13
allind	UROBE1963355_EIv1.0_0010720	0	1	UROBE1963355_EIv1.0_0010720.1	High	transposable_element_gene	DDE Tnp4 domain-containing protein	IPR027806 (Harbinger transposase-derived nuclease domain)	None	84	1110	1	2	2.145e-05	0.498209	-1.04726	UROBE1963355_EIv1.0_0010720	0.23027	0.30542	13
allind	UROBE1963355_EIv1.0_0010730	0	1	UROBE1963355_EIv1.0_0010730.1	Low	protein_coding_gene	Unknown protein	None	None	84	426	0	1	0	0.565728	NA	UROBE1963355_EIv1.0_0010730	0.23027	0.30542	13
allind	UROBE1963355_EIv1.0_0010740	0	1	UROBE1963355_EIv1.0_0010740.1	Low	protein_coding_gene	Unknown protein	None	None	84	528	0	1	0	0.429924	NA	UROBE1963355_EIv1.0_0010740	0.10493	0.36581	6
allind	UROBE1963355_EIv1.0_0010750	0	1	UROBE1963355_EIv1.0_0010750.1	High	protein_coding_gene	KH domain RNA binding protein	IPR004087 (K Homology domain)	None	84	1521	0	1	0	0.591059	NA	UROBE1963355_EIv1.0_0010750	0.18583	0.33035	9
allind	UROBE1963355_EIv1.0_0010760	0	1	UROBE1963355_EIv1.0_0010760.1	Low	predicted_gene	Unknown protein	None	None	84	300	0	1	0	0.48	NA	UROBE1963355_EIv1.0_0010760	0.26201	0.38478	10
allind	UROBE1963355_EIv1.0_0010770	0	1	UROBE1963355_EIv1.0_0010770.1	High	protein_coding_gene	BZIP domain-containing protein	None	GO:0003700, GO:0006355	84	726	0	1	0	0.526171	NA	UROBE1963355_EIv1.0_0010770	0.13738	0.22446	11
allind	UROBE1963355_EIv1.0_0010780	0	1	UROBE1963355_EIv1.0_0010780.1	High	protein_coding_gene	Protein-tyrosine phosphatase	IPR003595 (Protein-tyrosine phosphatase, catalytic), IPR029021 (Protein-tyrosine phosphatase-like)	GO:0004721, GO:0004725, GO:0006470, GO:0016311, GO:0016787, GO:0016791, GO:0035335	84	1215	0	1	0	0.56214	NA	UROBE1963355_EIv1.0_0010780	0.1468	0.22388	13
allind	UROBE1963355_EIv1.0_0010790	0	2	UROBE1963355_EIv1.0_0010790.1	High	protein_coding_gene	AN1-type domain-containing protein	IPR000058 (Zinc finger, AN1-type)	None	84	798	2	3	0.000171829	0.498657	-1.0452	UROBE1963355_EIv1.0_0010790	0.046013	0.060134	35
allind	UROBE1963355_EIv1.0_0010800	0	2	UROBE1963355_EIv1.0_0010800.1	High	protein_coding_gene	WD_REPEATS_REGION domain-containing protein	IPR015943 (WD40/YVTN repeat-like-containing domain)	None	84	1401	0	1	0	0.555318	NA	UROBE1963355_EIv1.0_0010800	0.1299	0.32219	15
allind	UROBE1963355_EIv1.0_0010810	0	1	UROBE1963355_EIv1.0_0010810.1	Low	protein_coding_gene	Unknown protein	None	None	84	288	0	1	0	0.520833	NA	UROBE1963355_EIv1.0_0010810	0.13463	0.39139	12
allind	UROBE1963355_EIv1.0_0010820	0	2	UROBE1963355_EIv1.0_0010820.1	High	protein_coding_gene	BZ3500_MvSof-1268-A1-R1_Chr8-1g09951 protein	IPR029044 (Nucleotide-diphospho-sugar transferases)	None	84	2331	2	3	4.95947e-05	0.568431	-1.13079	UROBE1963355_EIv1.0_0010820	0.15079	0.4458	14
allind	UROBE1963355_EIv1.0_0010830	0	1	UROBE1963355_EIv1.0_0010830.1	High	protein_coding_gene	Plasma membrane ATPase	IPR001757 (P-type ATPase), IPR023214 (HAD-like domain), IPR023298 (P-type ATPase, transmembrane domain)	GO:0000166, GO:0005524, GO:0005886, GO:0006811, GO:0008553, GO:0016020, GO:0016021, GO:0016787, GO:0120029	84	2886	0	1	0	0.521137	NA	UROBE1963355_EIv1.0_0010830	0.11927	0.31714	38
allind	UROBE1963355_EIv1.0_0010840	0	2	UROBE1963355_EIv1.0_0010840.1	High	transposable_element_gene	Integrase catalytic domain-containing protein	None	GO:0000943, GO:0003676, GO:0015074	84	711	1	2	6.61678e-05	0.47676	-0.909084	UROBE1963355_EIv1.0_0010840	0.14222	0.51985	12
allind	UROBE1963355_EIv1.0_0010850	0	5	UROBE1963355_EIv1.0_0010850.1	High	protein_coding_gene	Allantoicase	IPR005164 (Allantoicase), IPR007247 (Ureidoglycolate lyase), IPR008979 (Galactose-binding domain-like), IPR011051 (RmlC-like cupin domain)	None	84	1728	0	1	0	0.498264	NA	UROBE1963355_EIv1.0_0010850	0.059356	0.11212	56
allind	UROBE1963355_EIv1.0_0010860	0	1	UROBE1963355_EIv1.0_0010860.1	Low	predicted_gene	Unknown protein	None	None	84	327	0	1	0	0.446483	NA	UROBE1963355_EIv1.0_0010860	0.075583	0.13229	35
allind	UROBE1963355_EIv1.0_0010870	0	1	UROBE1963355_EIv1.0_0010870.1	High	protein_coding_gene	Unknown protein	None	None	84	312	0	1	0	0.573718	NA	UROBE1963355_EIv1.0_0010870	0.16981	0.43915	19
allind	UROBE1963355_EIv1.0_0010880	0	1	UROBE1963355_EIv1.0_0010880.1	High	protein_coding_gene	Septin-type G domain-containing protein	IPR016491 (Septin), IPR027417 (P-loop containing nucleoside triphosphate hydrolase), IPR030379 (Septin-type guanine nucleotide-binding (G) domain)	GO:0000166, GO:0005525	84	957	0	1	0	0.474399	NA	UROBE1963355_EIv1.0_0010880	0.34524	0.58272	16
allind	UROBE1963355_EIv1.0_0010890	0	1	UROBE1963355_EIv1.0_0010890.1	High	protein_coding_gene	Unknown protein	IPR032675 (Leucine-rich repeat domain, L domain-like)	None	84	1533	4	4	0.000682443	0.464472	0.630543	UROBE1963355_EIv1.0_0010890	0.1526	0.36238	14
allind	UROBE1963355_EIv1.0_0010900	0	1	UROBE1963355_EIv1.0_0010900.1	High	transposable_element_gene	Integrase catalytic domain-containing protein	IPR012337 (Ribonuclease H-like domain), IPR013103 (Reverse transcriptase, RNA-dependent DNA polymerase)	GO:0000943, GO:0003676, GO:0015074	84	3363	5	7	0.000302045	0.434416	0.035534	UROBE1963355_EIv1.0_0010900	0.1666	0.35165	17
allind	UROBE1963355_EIv1.0_0010910	0	1	UROBE1963355_EIv1.0_0010910.1	High	protein_coding_gene	HbrB-like-domain containing protein	IPR013745 (TORC2 component Bit61/PRR5)	None	84	3171	0	1	0	0.515926	NA	UROBE1963355_EIv1.0_0010910	0.016908	0.013872	40
allind	UROBE1963355_EIv1.0_0010920	0	1	UROBE1963355_EIv1.0_0010920.1	Low	predicted_gene	Unknown protein	None	None	84	300	1	2	7.93651e-05	0.456627	-1.04726	UROBE1963355_EIv1.0_0010920	0.047489	0.088159	8
allind	UROBE1963355_EIv1.0_0010930	0	2	UROBE1963355_EIv1.0_0010930.1	High	protein_coding_gene	Lipase_3 domain-containing protein	IPR029058 (Alpha/Beta hydrolase fold)	GO:0006629, GO:0016020, GO:0016021, GO:0016787	84	1935	1	2	7.99062e-05	0.493497	-0.269379	UROBE1963355_EIv1.0_0010930	0.055642	0.11693	14
allind	UROBE1963355_EIv1.0_0010940	0	2	UROBE1963355_EIv1.0_0010940.1	High	protein_coding_gene	Unknown protein	None	None	84	630	0	1	0	0.444444	NA	UROBE1963355_EIv1.0_0010940	0.11945	0.39865	12
allind	UROBE1963355_EIv1.0_0010950	0	1	UROBE1963355_EIv1.0_0010950.1	High	transposable_element_gene	Leucine-zipper-like transcriptional regulator 1	None	None	84	465	1	2	0.000569405	0.429775	0.38568	UROBE1963355_EIv1.0_0010950	0.16763	0.36399	21
allind	UROBE1963355_EIv1.0_0010960	0	1	UROBE1963355_EIv1.0_0010960.1	High	transposable_element_gene	Integrase catalytic domain-containing protein	None	None	84	1296	1	2	0.000103589	0.480655	-0.390496	UROBE1963355_EIv1.0_0010960	0.058709	0.23488	13
allind	UROBE1963355_EIv1.0_0010970	0	1	UROBE1963355_EIv1.0_0010970.1	Low	transposable_element_gene	Unknown protein	None	None	84	321	0	1	0	0.542056	NA	UROBE1963355_EIv1.0_0010970	0.051722	0.074473	29
allind	UROBE1963355_EIv1.0_0010980	0	3	UROBE1963355_EIv1.0_0010980.1	High	protein_coding_gene	NADH-ubiquinone oxidoreductase 14 kDa subunit, putative	None	GO:0016020, GO:0016021	84	288	0	1	0	0.475694	NA	UROBE1963355_EIv1.0_0010980	0.047841	0.06464	12
allind	UROBE1963355_EIv1.0_0010990	0	1	UROBE1963355_EIv1.0_0010990.1	Low	transposable_element_gene	Unknown protein	None	None	84	219	0	1	0	0.374429	NA	UROBE1963355_EIv1.0_0010990	0.058681	0.072301	13
allind	UROBE1963355_EIv1.0_0011000	0	1	UROBE1963355_EIv1.0_0011000.1	Low	predicted_gene	Unknown protein	None	None	84	174	0	1	0	0.45977	NA	UROBE1963355_EIv1.0_0011000	0.16861	0.2129	5
allind	UROBE1963355_EIv1.0_0011010	0	1	UROBE1963355_EIv1.0_0011010.1	High	protein_coding_gene	37S ribosomal protein S25, mitochondrial	IPR016939 (Mitochondrial ribosomal protein S25)	None	84	846	0	1	0	0.489362	NA	UROBE1963355_EIv1.0_0011010	0.23389	0.31997	5
allind	UROBE1963355_EIv1.0_0011020	0	2	UROBE1963355_EIv1.0_0011020.1	High	protein_coding_gene	Leo1-like protein	IPR007149 (Leo1-like protein)	None	84	1341	0	1	0	0.519761	NA	UROBE1963355_EIv1.0_0011020	0.097076	0.22108	7
allind	UROBE1963355_EIv1.0_0011030	0	1	UROBE1963355_EIv1.0_0011030.1	Low	transposable_element_gene	Retrotrans_gag domain-containing protein	None	None	84	273	1	2	8.72144e-05	0.542081	-1.04726	UROBE1963355_EIv1.0_0011030	0.034187	0.18674	23
allind	UROBE1963355_EIv1.0_0011040	0	1	UROBE1963355_EIv1.0_0011040.1	Low	transposable_element_gene	Unknown protein	None	None	84	387	1	2	0.000121564	0.643472	-0.909084	UROBE1963355_EIv1.0_0011040	0.01351	0.11147	22
allind	UROBE1963355_EIv1.0_0011050	0	1	UROBE1963355_EIv1.0_0011050.1	High	protein_coding_gene	Transcription factor IIIA	None	None	84	1455	1	2	1.63639e-05	0.516143	-1.04726	UROBE1963355_EIv1.0_0011050	0.051548	0.058375	20
allind	UROBE1963355_EIv1.0_0011060	0	3	UROBE1963355_EIv1.0_0011060.1	High	protein_coding_gene	5-formyltetrahydrofolate cyclo-ligase	IPR002698 (5-formyltetrahydrofolate cyclo-ligase), IPR024185 (5-formyltetrahydrofolate cyclo-ligase-like domain)	None	84	756	1	2	3.14941e-05	0.469593	-1.04726	UROBE1963355_EIv1.0_0011060	0.070642	0.2165	28
allind	UROBE1963355_EIv1.0_0011070	0	3	UROBE1963355_EIv1.0_0011070.1	High	protein_coding_gene	DUF300-domain-containing protein	IPR005178 (Organic solute transporter subunit alpha/Transmembrane protein 184)	GO:0016020, GO:0016021	84	1611	0	1	0	0.558038	NA	UROBE1963355_EIv1.0_0011070	0.049861	0.080573	31
allind	UROBE1963355_EIv1.0_0011080	0	1	UROBE1963355_EIv1.0_0011080.1	High	transposable_element_gene	Integrase catalytic domain-containing protein	None	GO:0000943, GO:0003676, GO:0015074	84	402	0	1	0	0.497512	NA	UROBE1963355_EIv1.0_0011080	0.039695	0.041379	20
allind	UROBE1963355_EIv1.0_0011090	0	1	UROBE1963355_EIv1.0_0011090.1	Low	transposable_element_gene	Unknown protein	None	None	84	402	0	1	0	0.497512	NA	UROBE1963355_EIv1.0_0011090	0.085893	0.1652	33
allind	UROBE1963355_EIv1.0_0011100	1	2	UROBE1963355_EIv1.0_0011100.1	Low	protein_coding_gene	Unknown protein	None	None	84	459	2	3	0.000628721	0.468072	-0.442611	UROBE1963355_EIv1.0_0011100	0.073695	0.14668	24
allind	UROBE1963355_EIv1.0_0011110	0	3	UROBE1963355_EIv1.0_0011110.1	High	protein_coding_gene	ATPase_2 domain-containing protein	IPR027417 (P-loop containing nucleoside triphosphate hydrolase)	None	84	1998	2	3	0.000219382	0.504362	0.153131	UROBE1963355_EIv1.0_0011110	0.089855	0.18941	37
allind	UROBE1963355_EIv1.0_0011120	0	1	UROBE1963355_EIv1.0_0011120.1	Low	predicted_gene	Unknown protein	None	None	84	195	0	1	0	0.466667	NA	UROBE1963355_EIv1.0_0011120	0.096892	0.1912	30
allind	UROBE1963355_EIv1.0_0011130	0	2	UROBE1963355_EIv1.0_0011130.1	High	transposable_element_gene	Unknown protein	None	None	84	282	0	1	0	0.531915	NA	UROBE1963355_EIv1.0_0011130	0.17682	0.29589	18
allind	UROBE1963355_EIv1.0_0011140	0	1	UROBE1963355_EIv1.0_0011140.1	High	transposable_element_gene	Integrase catalytic domain-containing protein	IPR013103 (Reverse transcriptase, RNA-dependent DNA polymerase)	GO:0000943, GO:0003676, GO:0015074	84	1149	0	1	0	0.48651	NA	UROBE1963355_EIv1.0_0011140	0.060202	0.073949	79
allind	UROBE1963355_EIv1.0_0011150	0	1	UROBE1963355_EIv1.0_0011150.1	High	transposable_element_gene	Integrase catalytic domain-containing protein	None	GO:0000943, GO:0003676, GO:0015074	84	480	0	1	0	0.416667	NA	UROBE1963355_EIv1.0_0011150	0.051566	0.059137	67
allind	UROBE1963355_EIv1.0_0011160	0	2	UROBE1963355_EIv1.0_0011160.1	High	protein_coding_gene	F-box domain-containing protein	IPR001810 (F-box domain), IPR021894 (Domain of unknown function DUF3506)	None	84	1776	0	1	0	0.518581	NA	UROBE1963355_EIv1.0_0011160	0.058939	0.06723	57
allind	UROBE1963355_EIv1.0_0011170	0	1	UROBE1963355_EIv1.0_0011170.1	High	transposable_element_gene	CDC37_N domain-containing protein	None	None	84	561	0	1	0	0.520499	NA	UROBE1963355_EIv1.0_0011170	0.10189	0.21659	16
allind	UROBE1963355_EIv1.0_0011180	0	1	UROBE1963355_EIv1.0_0011180.1	Low	protein_coding_gene	Reverse transcriptase Ty1/copia-type domain-containing protein	None	GO:0003676	84	372	0	1	0	0.475806	NA	UROBE1963355_EIv1.0_0011180	0.096739	0.17475	21
allind	UROBE1963355_EIv1.0_0011190	0	5	UROBE1963355_EIv1.0_0011190.1	High	protein_coding_gene	CSEP-16	IPR025659 (Tubby C-terminal-like domain)	None	84	810	0	1	0	0.502469	NA	UROBE1963355_EIv1.0_0011190	0.073725	0.14128	18
allind	UROBE1963355_EIv1.0_0011200	0	1	UROBE1963355_EIv1.0_0011200.1	Low	predicted_gene	Unknown protein	None	None	84	201	0	1	0	0.447761	NA	UROBE1963355_EIv1.0_0011200	0.2399	0.36622	10
allind	UROBE1963355_EIv1.0_0011210	0	3	UROBE1963355_EIv1.0_0011210.1	Low	predicted_gene	Unknown protein	None	None	84	156	0	1	0	0.429487	NA	UROBE1963355_EIv1.0_0011210	0.28205	0.44004	6
allind	UROBE1963355_EIv1.0_0011220	0	1	UROBE1963355_EIv1.0_0011220.1	High	protein_coding_gene	2-dehydropantoate 2-reductase	IPR008927 (6-phosphogluconate dehydrogenase C-terminal domain-like), IPR013328 (6-phosphogluconate dehydrogenase, domain 2), IPR016040 (NAD(P)-binding domain)	GO:0005737, GO:0008677, GO:0015940, GO:0016491, GO:0055114	84	1647	0	1	0	0.506375	NA	UROBE1963355_EIv1.0_0011220	0.28874	0.35889	9
allind	UROBE1963355_EIv1.0_0011230	0	1	UROBE1963355_EIv1.0_0011230.1	High	protein_coding_gene	Unknown protein	None	None	84	2073	0	1	0	0.508924	NA	UROBE1963355_EIv1.0_0011230	0.23553	0.279	9
allind	UROBE1963355_EIv1.0_0011240	0	1	UROBE1963355_EIv1.0_0011240.1	Low	predicted_gene	Unknown protein	None	None	84	201	0	1	0	0.462687	NA	UROBE1963355_EIv1.0_0011240	0.23283	0.28012	8
allind	UROBE1963355_EIv1.0_0011250	0	3	UROBE1963355_EIv1.0_0011250.1	High	protein_coding_gene	Unplaced genomic scaffold supercont2.2, whole genome shotgun sequence	None	GO:0016020, GO:0016021	84	1878	3	4	0.000462523	0.501889	0.830917	UROBE1963355_EIv1.0_0011250	0.22627	0.29344	10
allind	UROBE1963355_EIv1.0_0011260	0	2	UROBE1963355_EIv1.0_0011260.1	High	protein_coding_gene	Med12 domain-containing protein	IPR019035 (Mediator complex, subunit Med12)	GO:0003712, GO:0006357, GO:0016592	84	5316	2	3	9.77251e-05	0.460615	0.47611	UROBE1963355_EIv1.0_0011260	0.080474	0.098802	48
allind	UROBE1963355_EIv1.0_0011270	0	1	UROBE1963355_EIv1.0_0011270.1	High	transposable_element_gene	Integrase catalytic domain-containing protein	IPR012337 (Ribonuclease H-like domain)	GO:0000943, GO:0003676, GO:0015074	84	264	0	1	0	0.473485	NA	UROBE1963355_EIv1.0_0011270	0.27671	0.47058	16
allind	UROBE1963355_EIv1.0_0011280	0	1	UROBE1963355_EIv1.0_0011280.1	High	transposable_element_gene	Integrase catalytic domain-containing protein	IPR012337 (Ribonuclease H-like domain)	GO:0000943, GO:0003676, GO:0015074	84	477	1	2	9.86275e-05	0.440252	-0.909084	UROBE1963355_EIv1.0_0011280	0.24312	0.46388	20
allind	UROBE1963355_EIv1.0_0011290	0	2	UROBE1963355_EIv1.0_0011290.1	High	transposable_element_gene	DUF4219 domain-containing protein	None	None	84	273	1	2	0.00167599	0.429836	1.53203	UROBE1963355_EIv1.0_0011290	0.18223	0.34191	60
allind	UROBE1963355_EIv1.0_0011300	0	1	UROBE1963355_EIv1.0_0011300.1	High	protein_coding_gene	Zn(2)-C6 fungal-type domain-containing protein	IPR001138 (Zn(2)-C6 fungal-type DNA-binding domain)	None	84	3255	4	5	0.000229666	0.47769	-0.133282	UROBE1963355_EIv1.0_0011300	0.26948	0.55134	16
allind	UROBE1963355_EIv1.0_0011310	0	1	UROBE1963355_EIv1.0_0011310.1	Low	protein_coding_gene	Unknown protein	None	None	84	393	1	2	0.000119708	0.455531	-0.909084	UROBE1963355_EIv1.0_0011310	0.40819	0.61855	14
allind	UROBE1963355_EIv1.0_0011320	0	2	UROBE1963355_EIv1.0_0011320.1	Low	protein_coding_gene	Serine/threonine-protein phosphatase	IPR029052 (Metallo-dependent phosphatase-like)	GO:0004721, GO:0006470, GO:0016787	84	184	0	1	0	0.451087	NA	UROBE1963355_EIv1.0_0011320	0.24732	0.38577	2
allind	UROBE1963355_EIv1.0_0011330	0	1	UROBE1963355_EIv1.0_0011330.1	Low	predicted_gene	Unknown protein	None	None	84	276	0	1	0	0.48913	NA	UROBE1963355_EIv1.0_0011330	0.15958	0.35967	3
allind	UROBE1963355_EIv1.0_0011340	0	1	UROBE1963355_EIv1.0_0011340.1	High	protein_coding_gene	Protein arginine N-methyltransferase	IPR025799 (Protein arginine N-methyltransferase), IPR029063 (S-adenosyl-L-methionine-dependent methyltransferase)	GO:0006479, GO:0008168, GO:0016740, GO:0032259, GO:0035246	84	2562	0	1	0	0.464481	NA	UROBE1963355_EIv1.0_0011340	0.087566	0.26611	5
allind	UROBE1963355_EIv1.0_0011350	0	1	UROBE1963355_EIv1.0_0011350.1	High	protein_coding_gene	Inosine-5'-monophosphate dehydrogenase	IPR005990 (Inosine-5'-monophosphate dehydrogenase), IPR013785 (Aldolase-type TIM barrel)	GO:0000166, GO:0003824, GO:0003938, GO:0005737, GO:0006164, GO:0006177, GO:0006183, GO:0016491, GO:0046872, GO:0055114	84	1650	1	2	1.443e-05	0.500007	-1.04726	UROBE1963355_EIv1.0_0011350	0.059991	0.23091	7
allind	UROBE1963355_EIv1.0_0011360	0	2	UROBE1963355_EIv1.0_0011360.1	High	protein_coding_gene	DNA_MISMATCH_REPAIR_2 domain-containing protein	IPR000432 (DNA mismatch repair protein MutS, C-terminal), IPR007696 (DNA mismatch repair protein MutS, core), IPR027417 (P-loop containing nucleoside triphosphate hydrolase)	GO:0005524, GO:0006298, GO:0030983	84	2610	1	2	9.12242e-06	0.459008	-1.04726	UROBE1963355_EIv1.0_0011360	0.12322	0.33531	9
allind	UROBE1963355_EIv1.0_0011370	0	3	UROBE1963355_EIv1.0_0011370.1	Low	protein_coding_gene	Unknown protein	None	None	84	348	0	1	0	0.448276	NA	UROBE1963355_EIv1.0_0011370	0.14061	0.3449	8
allind	UROBE1963355_EIv1.0_0011380	0	1	UROBE1963355_EIv1.0_0011380.1	High	transposable_element_gene	CCHC-type domain-containing protein	IPR001878 (Zinc finger, CCHC-type)	GO:0003676, GO:0008270	84	1242	1	2	9.12322e-05	0.517665	-0.515026	UROBE1963355_EIv1.0_0011380	0.12637	0.30605	14
allind	UROBE1963355_EIv1.0_0011390	0	1	UROBE1963355_EIv1.0_0011390.1	High	protein_coding_gene	A_deaminase domain-containing protein	IPR001365 (Adenosine/AMP deaminase domain), IPR032466 (Metal-dependent hydrolase)	GO:0019239	84	1032	0	1	0	0.476744	NA	UROBE1963355_EIv1.0_0011390	0.27758	0.51153	12
allind	UROBE1963355_EIv1.0_0011400	0	1	UROBE1963355_EIv1.0_0011400.1	High	protein_coding_gene	Unknown protein	None	None	84	942	0	1	0	0.5138	NA	UROBE1963355_EIv1.0_0011400	0.099144	0.12749	29
allind	UROBE1963355_EIv1.0_0011410	0	5	UROBE1963355_EIv1.0_0011410.1	High	protein_coding_gene	PlsC domain-containing protein	IPR002123 (Phospholipid/glycerol acyltransferase), IPR032098 (Acyltransferase, C-terminal domain)	None	84	1320	0	1	0	0.507576	NA	UROBE1963355_EIv1.0_0011410	0.09811	0.15412	36
allind	UROBE1963355_EIv1.0_0011420	0	1	UROBE1963355_EIv1.0_0011420.1	Low	predicted_gene	Unknown protein	None	None	84	462	1	2	0.00010183	0.538961	-0.909084	UROBE1963355_EIv1.0_0011420	0.11736	0.20677	30
allind	UROBE1963355_EIv1.0_0011430	0	1	UROBE1963355_EIv1.0_0011430.1	High	transposable_element_gene	Integrase catalytic domain-containing protein	None	GO:0000943, GO:0003676, GO:0015074	84	115	0	1	0	0.434783	NA	UROBE1963355_EIv1.0_0011430	0.20738	0.41104	33
allind	UROBE1963355_EIv1.0_0011440	0	1	UROBE1963355_EIv1.0_0011440.1	Low	transposable_element_gene	Unknown protein	None	None	84	165	1	2	0.000556338	0.557287	-0.642967	UROBE1963355_EIv1.0_0011440	0.28354	0.49721	33
allind	UROBE1963355_EIv1.0_0011450	0	1	UROBE1963355_EIv1.0_0011450.1	High	protein_coding_gene	BZIP domain-containing protein	None	GO:0003700, GO:0006355	84	480	0	1	0	0.45	NA	UROBE1963355_EIv1.0_0011450	0.058953	0.073148	19
allind	UROBE1963355_EIv1.0_0011460	1	1	UROBE1963355_EIv1.0_0011460.1	High	protein_coding_gene	Related to cell wall mannoprotein	None	None	84	792	0	1	0	0.453283	NA	UROBE1963355_EIv1.0_0011460	0.39378	0.82782	19
allind	UROBE1963355_EIv1.0_0011470	0	1	UROBE1963355_EIv1.0_0011470.1	High	protein_coding_gene	TBPIP domain-containing protein	IPR010776 (Tat binding protein 1-interacting), IPR011991 (Winged helix-turn-helix DNA-binding domain)	None	84	795	0	1	0	0.437736	NA	UROBE1963355_EIv1.0_0011470	0.38683	0.81331	21
allind	UROBE1963355_EIv1.0_0011480	0	4	UROBE1963355_EIv1.0_0011480.1	High	protein_coding_gene	CN hydrolase domain-containing protein	IPR003010 (Carbon-nitrogen hydrolase)	GO:0006807, GO:0008418, GO:0070773	84	906	0	1	0	0.480133	NA	UROBE1963355_EIv1.0_0011480	0.41513	0.82078	22
allind	UROBE1963355_EIv1.0_0011490	0	1	UROBE1963355_EIv1.0_0011490.1	Low	protein_coding_gene	Unknown protein	None	None	84	351	0	1	0	0.549858	NA	UROBE1963355_EIv1.0_0011490	0.38851	0.81362	15
allind	UROBE1963355_EIv1.0_0011500	0	1	UROBE1963355_EIv1.0_0011500.1	High	protein_coding_gene	Aldehyde dehydrogenase	IPR016161 (Aldehyde/histidinol dehydrogenase)	GO:0016491, GO:0016620, GO:0055114	84	1503	0	1	0	0.481038	NA	UROBE1963355_EIv1.0_0011500	0.40016	0.78142	15
allind	UROBE1963355_EIv1.0_0011510	0	2	UROBE1963355_EIv1.0_0011510.1	High	protein_coding_gene	Proteasome activator subunit 4	IPR016024 (Armadillo-type fold), IPR021843 (Protein of unknown function DUF3437), IPR032430 (Proteasome activator Blm10, mid region)	GO:0000502, GO:0010952, GO:0016504, GO:0070577, GO:0070628	84	5772	1	2	4.125e-06	0.466911	-1.04726	UROBE1963355_EIv1.0_0011510	0.073575	0.13997	33
allind	UROBE1963355_EIv1.0_0011520	0	2	UROBE1963355_EIv1.0_0011520.1	High	protein_coding_gene	Unknown protein	IPR013183 (DASH complex subunit Hsk3-like)	None	84	276	2	2	0.000172533	0.405797	-1.40128	UROBE1963355_EIv1.0_0011520	0.065862	0.1359	30
allind	UROBE1963355_EIv1.0_0011530	0	2	UROBE1963355_EIv1.0_0011530.1	High	protein_coding_gene	Unknown protein	None	None	84	1032	2	3	0.000297424	0.527939	-0.369569	UROBE1963355_EIv1.0_0011530	0.048884	0.066316	23
allind	UROBE1963355_EIv1.0_0011540	0	1	UROBE1963355_EIv1.0_0011540.1	High	protein_coding_gene	Integrase catalytic domain-containing protein	None	GO:0000943, GO:0003676, GO:0015074	84	1230	0	1	0	0.404878	NA	UROBE1963355_EIv1.0_0011540	0.21648	0.28591	11
allind	UROBE1963355_EIv1.0_0011550	0	2	UROBE1963355_EIv1.0_0011550.1	High	protein_coding_gene	Sds3-like family protein	IPR013907 (Sds3-like)	None	84	1149	0	1	0	0.523934	NA	UROBE1963355_EIv1.0_0011550	0.12417	0.25605	10
allind	UROBE1963355_EIv1.0_0011560	0	1	UROBE1963355_EIv1.0_0011560.1	Low	protein_coding_gene	Nudix hydrolase domain-containing protein	None	GO:0016787	84	270	1	2	0.000572661	0.521914	-0.269379	UROBE1963355_EIv1.0_0011560	0.11672	0.24463	11
allind	UROBE1963355_EIv1.0_0011570	0	6	UROBE1963355_EIv1.0_0011570.1	High	protein_coding_gene	Cytochrome c oxidase assembly protein	IPR031568 (Protein Pet117, mitochondrial)	None	84	321	0	1	0	0.395639	NA	UROBE1963355_EIv1.0_0011570	0.063468	0.16763	17
allind	UROBE1963355_EIv1.0_0011580	0	1	UROBE1963355_EIv1.0_0011580.1	High	transposable_element_gene	Integrase catalytic domain-containing protein	IPR012337 (Ribonuclease H-like domain), IPR013103 (Reverse transcriptase, RNA-dependent DNA polymerase)	GO:0003676, GO:0008270, GO:0015074	84	1215	1	2	0.000331249	0.52039	1.2045	UROBE1963355_EIv1.0_0011580	0.021511	0.018641	33
allind	UROBE1963355_EIv1.0_0011590	0	2	UROBE1963355_EIv1.0_0011590.1	Low	transposable_element_gene	Unknown protein	None	None	84	378	2	3	0.000624569	0.515904	-0.651463	UROBE1963355_EIv1.0_0011590	0.012839	0.0057007	32
allind	UROBE1963355_EIv1.0_0011600	1	4	UROBE1963355_EIv1.0_0011600.1	Low	transposable_element_gene	Unknown protein	None	None	84	519	0	1	0	0.462428	NA	UROBE1963355_EIv1.0_0011600	0.01364	0.0060583	33
allind	UROBE1963355_EIv1.0_0011610	0	1	UROBE1963355_EIv1.0_0011610.1	Low	predicted_gene	Unknown protein	None	None	84	223	2	3	0.00245698	0.462898	0.589096	UROBE1963355_EIv1.0_0011610	0.024162	0.026848	46
allind	UROBE1963355_EIv1.0_0011620	0	1	UROBE1963355_EIv1.0_0011620.1	High	protein_coding_gene	RNase H domain-containing protein	None	GO:0003676, GO:0004523, GO:0090502	84	690	0	1	0	0.488406	NA	UROBE1963355_EIv1.0_0011620	0.026833	0.095692	15
allind	UROBE1963355_EIv1.0_0011630	0	2	UROBE1963355_EIv1.0_0011630.1	High	protein_coding_gene	Unknown protein	None	None	84	591	2	3	0.000399471	0.51271	-0.651463	UROBE1963355_EIv1.0_0011630	0.040351	0.13167	10
allind	UROBE1963355_EIv1.0_0011640	0	1	UROBE1963355_EIv1.0_0011640.1	High	protein_coding_gene	RNase H domain-containing protein	IPR012337 (Ribonuclease H-like domain)	GO:0003676, GO:0004523, GO:0090502	84	912	2	3	0.000278684	0.500013	-0.579563	UROBE1963355_EIv1.0_0011640	0.040351	0.13167	10
allind	UROBE1963355_EIv1.0_0011650	0	6	UROBE1963355_EIv1.0_0011650.1	High	protein_coding_gene	Myosin-1	IPR001452 (SH3 domain), IPR010926 (Class I myosin tail homology domain), IPR027417 (P-loop containing nucleoside triphosphate hydrolase)	GO:0000166, GO:0003774, GO:0003779, GO:0005524, GO:0005737, GO:0005856, GO:0016459, GO:0016787, GO:0030479	84	4065	2	3	3.88833e-05	0.481412	-0.961888	UROBE1963355_EIv1.0_0011650	0.061296	0.12618	39
allind	UROBE1963355_EIv1.0_0011660	0	1	UROBE1963355_EIv1.0_0011660.1	High	transposable_element_gene	Integrase catalytic domain-containing protein	None	GO:0000943, GO:0003676, GO:0015074	84	798	0	1	0	0.41604	NA	UROBE1963355_EIv1.0_0011660	0.049349	0.11787	26
allind	UROBE1963355_EIv1.0_0011670	0	4	UROBE1963355_EIv1.0_0011670.1	High	protein_coding_gene	Deoxyhypusine synthase	IPR002773 (Deoxyhypusine synthase), IPR029035 (DHS-like NAD/FAD-binding domain)	None	84	1227	2	4	0.000453555	0.477258	0.623334	UROBE1963355_EIv1.0_0011670	0.074668	0.14742	28
allind	UROBE1963355_EIv1.0_0011680	0	1	UROBE1963355_EIv1.0_0011680.1	High	transposable_element_gene	Integrase catalytic domain-containing protein	None	GO:0000943, GO:0003676, GO:0015074	84	330	0	1	0	0.360606	NA	UROBE1963355_EIv1.0_0011680	0.1091	0.20547	18
allind	UROBE1963355_EIv1.0_0011690	0	2	UROBE1963355_EIv1.0_0011690.1	High	transposable_element_gene	Integrase catalytic domain-containing protein	IPR012337 (Ribonuclease H-like domain), IPR013103 (Reverse transcriptase, RNA-dependent DNA polymerase)	GO:0000943, GO:0003676, GO:0015074	84	1944	0	1	0	0.446502	NA	UROBE1963355_EIv1.0_0011690	0.06416	0.19917	52
allind	UROBE1963355_EIv1.0_0011700	0	1	UROBE1963355_EIv1.0_0011700.1	High	protein_coding_gene	Unplaced genomic scaffold GYMLUscaffold_61, whole genome shotgun sequence	IPR019410 (Lysine methyltransferase), IPR029063 (S-adenosyl-L-methionine-dependent methyltransferase)	None	84	1077	1	2	2.21073e-05	0.518117	-1.04726	UROBE1963355_EIv1.0_0011700	0.078061	0.23788	21
allind	UROBE1963355_EIv1.0_0011710	0	1	UROBE1963355_EIv1.0_0011710.1	High	protein_coding_gene	Rho-GAP domain-containing protein	IPR001251 (CRAL-TRIO lipid binding domain), IPR008936 (Rho GTPase activation protein)	GO:0007165	84	1926	3	4	4.91508e-05	0.493757	-1.56095	UROBE1963355_EIv1.0_0011710	0.070721	0.1107	42
allind	UROBE1963355_EIv1.0_0011720	0	2	UROBE1963355_EIv1.0_0011720.1	Low	transposable_element_gene	Unknown protein	None	None	84	255	2	3	0.00308573	0.423203	1.53977	UROBE1963355_EIv1.0_0011720	0.15247	0.24655	20
allind	UROBE1963355_EIv1.0_0011730	0	1	UROBE1963355_EIv1.0_0011730.1	High	transposable_element_gene	Retrotrans_gag domain-containing protein	IPR005162 (Retrotransposon gag domain), IPR032567 (LDOC1-related)	None	84	825	17	16	0.00943897	0.515815	3.73387	UROBE1963355_EIv1.0_0011730	0.00085842	0.00023908	62
allind	UROBE1963355_EIv1.0_0011740	0	1	UROBE1963355_EIv1.0_0011740.1	High	transposable_element_gene	Integrase catalytic domain-containing protein	IPR012337 (Ribonuclease H-like domain)	GO:0003676, GO:0015074	84	447	2	3	0.00045885	0.550309	-0.77472	UROBE1963355_EIv1.0_0011740	0.0065761	0.0076116	174
allind	UROBE1963355_EIv1.0_0011750	0	1	UROBE1963355_EIv1.0_0011750.1	High	transposable_element_gene	Retrotransposable element Tf2 155 kDa protein type 1	IPR000477 (Reverse transcriptase domain), IPR012337 (Ribonuclease H-like domain), IPR015416 (Zinc finger, H2C2-type, histone UAS binding)	GO:0003676, GO:0005634, GO:0015074	84	2271	92	56	0.0163531	0.491912	3.40412	UROBE1963355_EIv1.0_0011750	0.0097989	0.011047	180
allind	UROBE1963355_EIv1.0_0011760	0	1	UROBE1963355_EIv1.0_0011760.1	High	protein_coding_gene	Alpha-galactosidase	IPR002241 (Glycoside hydrolase, family 27), IPR013780 (Glycosyl hydrolase, all-beta)	GO:0003824, GO:0004553, GO:0004557, GO:0005975, GO:0008152, GO:0016020, GO:0016021, GO:0016787, GO:0016798, GO:0052692	84	1698	0	1	0	0.45053	NA	UROBE1963355_EIv1.0_0011760	0.072011	0.14439	19
allind	UROBE1963355_EIv1.0_0011770	0	1	UROBE1963355_EIv1.0_0011770.1	High	protein_coding_gene	Unknown protein	None	None	84	1446	1	2	1.64658e-05	0.521447	-1.04726	UROBE1963355_EIv1.0_0011770	0.10612	0.212	21
allind	UROBE1963355_EIv1.0_0011780	0	2	UROBE1963355_EIv1.0_0011780.1	High	transposable_element_gene	Integrase catalytic domain-containing protein	None	GO:0000943, GO:0003676, GO:0015074	84	798	2	3	5.9673e-05	0.472461	-1.40128	UROBE1963355_EIv1.0_0011780	0.19313	0.46067	19
allind	UROBE1963355_EIv1.0_0011790	0	1	UROBE1963355_EIv1.0_0011790.1	High	transposable_element_gene	Integrase catalytic domain-containing protein	IPR012337 (Ribonuclease H-like domain)	GO:0000943, GO:0003676, GO:0015074	84	1200	0	1	0	0.465	NA	UROBE1963355_EIv1.0_0011790	0.20283	0.42099	16
allind	UROBE1963355_EIv1.0_0011800	0	1	UROBE1963355_EIv1.0_0011800.1	High	transposable_element_gene	CCHC-type domain-containing protein	None	GO:0000943, GO:0003676, GO:0008270	84	564	0	1	0	0.487589	NA	UROBE1963355_EIv1.0_0011800	0.28032	0.54845	17
allind	UROBE1963355_EIv1.0_0011810	0	1	UROBE1963355_EIv1.0_0011810.1	High	protein_coding_gene	Unknown protein	None	None	84	1638	3	4	4.36072e-05	0.547612	-1.63276	UROBE1963355_EIv1.0_0011810	0.056013	0.19442	23
allind	UROBE1963355_EIv1.0_0011820	0	1	UROBE1963355_EIv1.0_0011820.1	High	transposable_element_gene	Integrase catalytic domain-containing protein	None	GO:0000943, GO:0003676, GO:0015074	84	510	0	1	0	0.445098	NA	UROBE1963355_EIv1.0_0011820	0.16977	0.63118	8
allind	UROBE1963355_EIv1.0_0011830	0	1	UROBE1963355_EIv1.0_0011830.1	Low	transposable_element_gene	Integrase catalytic domain-containing protein	None	GO:0000943, GO:0003676, GO:0015074	84	627	0	1	0	0.457735	NA	UROBE1963355_EIv1.0_0011830	0.23864	0.66642	10
allind	UROBE1963355_EIv1.0_0011840	0	1	UROBE1963355_EIv1.0_0011840.1	High	transposable_element_gene	Integrase catalytic domain-containing protein	None	GO:0000943, GO:0003676, GO:0015074	84	641	0	1	0	0.475819	NA	UROBE1963355_EIv1.0_0011840	0.22848	0.61476	8
allind	UROBE1963355_EIv1.0_0011850	1	1	UROBE1963355_EIv1.0_0011850.1	High	transposable_element_gene	Integrase catalytic domain-containing protein	IPR013103 (Reverse transcriptase, RNA-dependent DNA polymerase)	GO:0000943, GO:0003676, GO:0015074	84	510	0	1	0	0.447059	NA	UROBE1963355_EIv1.0_0011850	0.23265	0.60921	9
allind	UROBE1963355_EIv1.0_0011860	0	2	UROBE1963355_EIv1.0_0011860.1	High	transposable_element_gene	Integrase catalytic domain-containing protein	None	GO:0000943, GO:0003676, GO:0015074	84	657	1	2	0.00013972	0.458143	-0.642967	UROBE1963355_EIv1.0_0011860	0.13379	0.53869	8
allind	UROBE1963355_EIv1.0_0011870	0	1	UROBE1963355_EIv1.0_0011870.1	Low	transposable_element_gene	Unknown protein	None	None	84	468	0	1	0	0.587607	NA	UROBE1963355_EIv1.0_0011870	0.070048	0.2707	27
allind	UROBE1963355_EIv1.0_0011880	0	2	UROBE1963355_EIv1.0_0011880.1	High	protein_coding_gene	zf-RING-like domain-containing protein	IPR011513 (Non-structural maintenance of chromosomes element 1), IPR014857 (Zinc finger, RING-like)	GO:0006281, GO:0030915	84	948	1	2	4.96259e-05	0.433569	-0.909084	UROBE1963355_EIv1.0_0011880	0.058251	0.10671	13
allind	UROBE1963355_EIv1.0_0011890	0	3	UROBE1963355_EIv1.0_0011890.1	High	protein_coding_gene	Family 5 glycoside hydrolase	IPR017853 (Glycoside hydrolase superfamily)	GO:0016787	84	2022	0	1	0	0.483679	NA	UROBE1963355_EIv1.0_0011890	0.060931	0.066282	28
allind	UROBE1963355_EIv1.0_0011900	0	1	UROBE1963355_EIv1.0_0011900.1	Low	predicted_gene	Unknown protein	None	None	84	165	0	1	0	0.412121	NA	UROBE1963355_EIv1.0_0011900	0.055089	0.067901	14
allind	UROBE1963355_EIv1.0_0011910	0	2	UROBE1963355_EIv1.0_0011910.1	High	protein_coding_gene	Family 5 glycoside hydrolase	IPR017853 (Glycoside hydrolase superfamily)	GO:0016787	84	1770	0	1	0	0.457062	NA	UROBE1963355_EIv1.0_0011910	0.058297	0.087377	22
allind	UROBE1963355_EIv1.0_0011920	0	1	UROBE1963355_EIv1.0_0011920.1	Low	predicted_gene	Unknown protein	None	None	84	306	0	1	0	0.5	NA	UROBE1963355_EIv1.0_0011920	0.049148	0.070265	18
allind	UROBE1963355_EIv1.0_0011930	0	1	UROBE1963355_EIv1.0_0011930.1	Low	transposable_element_gene	Unknown protein	None	None	84	324	0	1	0	0.404321	NA	UROBE1963355_EIv1.0_0011930	0.010436	0.0062099	29
allind	UROBE1963355_EIv1.0_0011940	0	1	UROBE1963355_EIv1.0_0011940.1	Low	transposable_element_gene	Unknown protein	None	None	84	234	0	1	0	0.401709	NA	UROBE1963355_EIv1.0_0011940	0.065823	0.10737	22
allind	UROBE1963355_EIv1.0_0011950	0	1	UROBE1963355_EIv1.0_0011950.1	Low	transposable_element_gene	Unknown protein	None	None	84	480	0	1	0	0.4375	NA	UROBE1963355_EIv1.0_0011950	0.035787	0.067942	14
allind	UROBE1963355_EIv1.0_0011960	0	1	UROBE1963355_EIv1.0_0011960.1	Low	transposable_element_gene	Unknown protein	None	None	84	324	0	1	0	0.469136	NA	UROBE1963355_EIv1.0_0011960	0.029555	0.020792	35
allind	UROBE1963355_EIv1.0_0011970	0	1	UROBE1963355_EIv1.0_0011970.1	High	transposable_element_gene	Reverse transcriptase Ty1/copia-type domain-containing protein	None	None	84	846	0	1	0	0.520095	NA	UROBE1963355_EIv1.0_0011970	0.14698	0.26703	12
allind	UROBE1963355_EIv1.0_0011980	0	4	UROBE1963355_EIv1.0_0011980.1	High	protein_coding_gene	Protein kinase domain-containing protein	IPR011009 (Protein kinase-like domain)	None	84	1518	0	1	0	0.449934	NA	UROBE1963355_EIv1.0_0011980	0.044481	0.043077	42
allind	UROBE1963355_EIv1.0_0011990	0	3	UROBE1963355_EIv1.0_0011990.1	High	protein_coding_gene	Short-chain dehydrogenase	IPR002347 (Short-chain dehydrogenase/reductase SDR)	None	84	786	0	1	0	0.458015	NA	UROBE1963355_EIv1.0_0011990	0.058253	0.10444	39
allind	UROBE1963355_EIv1.0_0012000	0	2	UROBE1963355_EIv1.0_0012000.1	High	transposable_element_gene	RNase H domain-containing protein	IPR012337 (Ribonuclease H-like domain)	GO:0003676, GO:0004523, GO:0090502	84	636	0	1	0	0.457547	NA	UROBE1963355_EIv1.0_0012000	0.044345	0.070873	56
allind	UROBE1963355_EIv1.0_0012010	0	1	UROBE1963355_EIv1.0_0012010.1	High	transposable_element_gene	Integrase catalytic domain-containing protein	None	GO:0000943, GO:0003676, GO:0015074	84	1260	3	4	0.000455791	0.486961	-0.078667	UROBE1963355_EIv1.0_0012010	0.085432	0.28316	24
allind	UROBE1963355_EIv1.0_0012020	0	1	UROBE1963355_EIv1.0_0012020.1	High	protein_coding_gene	Mitochondrial import inner membrane translocase subunit TIM50	IPR004274 (FCP1 homology domain), IPR023214 (HAD-like domain), IPR027111 (Mitochondrial import inner membrane translocase subunit Tim50)	GO:0005743, GO:0005744, GO:0015031	84	1404	2	3	0.000168153	0.476487	-0.651463	UROBE1963355_EIv1.0_0012020	0.03003	0.063432	62
allind	UROBE1963355_EIv1.0_0012030	0	1	UROBE1963355_EIv1.0_0012030.1	High	transposable_element_gene	Integrase catalytic domain-containing protein	None	None	84	1608	0	1	0	0.492537	NA	UROBE1963355_EIv1.0_0012030	0.068834	0.23864	31
allind	UROBE1963355_EIv1.0_0012040	0	1	UROBE1963355_EIv1.0_0012040.1	High	transposable_element_gene	Reverse transcriptase Ty1/copia-type domain-containing protein	IPR013103 (Reverse transcriptase, RNA-dependent DNA polymerase)	None	84	939	1	2	0.000536147	0.519131	1.80497	UROBE1963355_EIv1.0_0012040	0.047689	0.19297	25
allind	UROBE1963355_EIv1.0_0012050	0	1	UROBE1963355_EIv1.0_0012050.1	High	transposable_element_gene	Integrase catalytic domain-containing protein	None	GO:0000943, GO:0003676, GO:0015074	84	1113	1	2	6.26302e-05	0.512162	-0.774319	UROBE1963355_EIv1.0_0012050	0.091464	0.23224	14
allind	UROBE1963355_EIv1.0_0012060	0	1	UROBE1963355_EIv1.0_0012060.1	High	transposable_element_gene	Integrase catalytic domain-containing protein	None	None	84	537	11	16	0.00531522	0.411124	0.797284	UROBE1963355_EIv1.0_0012060	0.02224	0.049327	76
allind	UROBE1963355_EIv1.0_0012070	0	1	UROBE1963355_EIv1.0_0012070.1	High	protein_coding_gene	AFG1-like ATPase	IPR005654 (ATPase, AFG1-like), IPR027417 (P-loop containing nucleoside triphosphate hydrolase)	None	84	1692	0	1	0	0.51773	NA	UROBE1963355_EIv1.0_0012070	0.024277	0.032781	64
allind	UROBE1963355_EIv1.0_0012080	0	1	UROBE1963355_EIv1.0_0012080.1	Low	transposable_element_gene	Unknown protein	None	None	84	132	5	10	0.0186265	0.395292	3.20225	UROBE1963355_EIv1.0_0012080	0.023074	0.031958	60
allind	UROBE1963355_EIv1.0_0012090	0	1	UROBE1963355_EIv1.0_0012090.1	High	transposable_element_gene	CCHC-type domain-containing protein	None	GO:0003676, GO:0008270	84	432	0	1	0	0.50463	NA	UROBE1963355_EIv1.0_0012090	0.054048	0.1504	24
allind	UROBE1963355_EIv1.0_0012100	0	1	UROBE1963355_EIv1.0_0012100.1	Low	transposable_element_gene	Unknown protein	None	None	84	468	0	1	0	0.549145	NA	UROBE1963355_EIv1.0_0012100	0.0096789	0.023213	16
allind	UROBE1963355_EIv1.0_0012110	0	1	UROBE1963355_EIv1.0_0012110.1	High	transposable_element_gene	Integrase catalytic domain-containing protein	None	GO:0000943, GO:0003676, GO:0015074	84	291	0	1	0	0.439862	NA	UROBE1963355_EIv1.0_0012110	0.094578	0.33865	26
allind	UROBE1963355_EIv1.0_0012120	0	1	UROBE1963355_EIv1.0_0012120.1	High	transposable_element_gene	Integrase catalytic domain-containing protein	None	GO:0000943, GO:0003676, GO:0015074	84	600	0	1	0	0.455	NA	UROBE1963355_EIv1.0_0012120	0.091439	0.31926	28
allind	UROBE1963355_EIv1.0_0012130	0	2	UROBE1963355_EIv1.0_0012130.1	Low	protein_coding_gene	Unknown protein	None	None	84	984	0	1	0	0.431911	NA	UROBE1963355_EIv1.0_0012130	0.12949	0.38802	22
allind	UROBE1963355_EIv1.0_0012140	1	2	UROBE1963355_EIv1.0_0012140.1	High	protein_coding_gene	Alpha-amylase	IPR006046 (Alpha amylase)	None	84	639	0	1	0	0.56964	NA	UROBE1963355_EIv1.0_0012140	0.070709	0.073648	4
allind	UROBE1963355_EIv1.0_0012150	0	1	UROBE1963355_EIv1.0_0012150.1	High	transposable_element_gene	Integrase catalytic domain-containing protein	None	None	84	771	1	2	6.10186e-05	0.403341	-0.909084	UROBE1963355_EIv1.0_0012150	0.084055	0.12914	30
allind	UROBE1963355_EIv1.0_0012160	0	2	UROBE1963355_EIv1.0_0012160.1	High	protein_coding_gene	Meiotic nuclear division protein 1	IPR005647 (Meiotic nuclear division protein 1)	None	84	648	0	1	0	0.475309	NA	UROBE1963355_EIv1.0_0012160	0.038436	0.061787	26
allind	UROBE1963355_EIv1.0_0012170	0	2	UROBE1963355_EIv1.0_0012170.1	Low	predicted_gene	Unknown protein	None	None	84	168	0	1	0	0.517857	NA	UROBE1963355_EIv1.0_0012170	0.036711	0.058755	25
allind	UROBE1963355_EIv1.0_0012180	0	1	UROBE1963355_EIv1.0_0012180.1	High	protein_coding_gene	37S ribosomal protein S22	IPR015324 (Ribosomal protein Rsm22, bacterial-type), IPR029063 (S-adenosyl-L-methionine-dependent methyltransferase)	None	84	1806	1	2	1.31836e-05	0.49501	-1.04726	UROBE1963355_EIv1.0_0012180	0.028659	0.15667	8
allind	UROBE1963355_EIv1.0_0012190	0	1	UROBE1963355_EIv1.0_0012190.1	High	protein_coding_gene	WD_REPEATS_REGION domain-containing protein	IPR015943 (WD40/YVTN repeat-like-containing domain)	None	84	1833	3	4	9.922e-05	0.469183	-1.29144	UROBE1963355_EIv1.0_0012190	0.081666	0.16888	17
allind	UROBE1963355_EIv1.0_0012200	0	1	UROBE1963355_EIv1.0_0012200.1	High	protein_coding_gene	AAA domain-containing protein	IPR000642 (Peptidase M41), IPR003959 (ATPase, AAA-type, core), IPR011546 (Peptidase M41, FtsH extracellular), IPR027417 (P-loop containing nucleoside triphosphate hydrolase)	GO:0000166, GO:0004222, GO:0005524, GO:0006508, GO:0008270, GO:0016021	84	2649	2	3	4.36411e-05	0.483179	-1.13079	UROBE1963355_EIv1.0_0012200	0.15113	0.21555	26
allind	UROBE1963355_EIv1.0_0012210	0	1	UROBE1963355_EIv1.0_0012210.1	High	protein_coding_gene	Ndufa5, NADH-ubiquinone oxidoreductase subunit	IPR006806 (ETC complex I subunit)	GO:0005747, GO:0022904	84	759	0	1	0	0.523057	NA	UROBE1963355_EIv1.0_0012210	0.14428	0.18953	35
allind	UROBE1963355_EIv1.0_0012220	0	1	UROBE1963355_EIv1.0_0012220.1	High	transposable_element_gene	Integrase catalytic domain-containing protein	None	GO:0000943, GO:0003676, GO:0015074	84	426	0	1	0	0.553991	NA	UROBE1963355_EIv1.0_0012220	0.043279	0.088688	16
allind	UROBE1963355_EIv1.0_0012230	0	2	UROBE1963355_EIv1.0_0012230.1	High	protein_coding_gene	Proteophosphoglycan ppg4	None	None	84	2661	1	2	2.61959e-05	0.547928	-0.774319	UROBE1963355_EIv1.0_0012230	0.079839	0.21272	11
allind	UROBE1963355_EIv1.0_0012240	0	1	UROBE1963355_EIv1.0_0012240.1	Low	protein_coding_gene	Unknown protein	None	None	84	651	0	1	0	0.53149	NA	UROBE1963355_EIv1.0_0012240	0.098896	0.2156	13
allind	UROBE1963355_EIv1.0_0012250	0	3	UROBE1963355_EIv1.0_0012250.1	High	protein_coding_gene	Unknown protein	None	None	84	1476	1	2	1.61311e-05	0.493233	-1.04726	UROBE1963355_EIv1.0_0012250	0.067692	0.28406	9
allind	UROBE1963355_EIv1.0_0012260	0	3	UROBE1963355_EIv1.0_0012260.1	High	protein_coding_gene	VWFA domain-containing protein	IPR002035 (von Willebrand factor, type A)	None	84	1473	0	1	0	0.523422	NA	UROBE1963355_EIv1.0_0012260	0.073587	0.28631	9
allind	UROBE1963355_EIv1.0_0012270	1	2	UROBE1963355_EIv1.0_0012270.1	High	protein_coding_gene	PUA domain-containing protein	None	GO:0003723, GO:0004349, GO:0005737, GO:0006561, GO:0016310	84	972	1	2	4.84005e-05	0.454757	-0.909084	UROBE1963355_EIv1.0_0012270	0.12241	0.15234	12
allind	UROBE1963355_EIv1.0_0012280	0	1	UROBE1963355_EIv1.0_0012280.1	Low	protein_coding_gene	Unknown protein	None	None	84	198	1	2	0.00208627	0.503607	1.26762	UROBE1963355_EIv1.0_0012280	0.12253	0.1517	13
allind	UROBE1963355_EIv1.0_0012290	0	1	UROBE1963355_EIv1.0_0012290.1	High	transposable_element_gene	Integrase catalytic domain-containing protein	None	GO:0003676, GO:0015074	84	369	0	1	0	0.452574	NA	UROBE1963355_EIv1.0_0012290	0.081135	0.10558	10
allind	UROBE1963355_EIv1.0_0012300	0	1	UROBE1963355_EIv1.0_0012300.1	High	transposable_element_gene	Integrase catalytic domain-containing protein	None	None	84	327	0	1	0	0.492355	NA	UROBE1963355_EIv1.0_0012300	0.12847	0.16416	56
allind	UROBE1963355_EIv1.0_0012310	0	2	UROBE1963355_EIv1.0_0012310.1	High	transposable_element_gene	Integrase catalytic domain-containing protein	None	GO:0000943, GO:0003676, GO:0015074	84	399	0	1	0	0.390977	NA	UROBE1963355_EIv1.0_0012310	0.13213	0.15039	47
allind	UROBE1963355_EIv1.0_0012320	0	1	UROBE1963355_EIv1.0_0012320.1	High	transposable_element_gene	Integrase catalytic domain-containing protein	None	None	84	438	0	1	0	0.509132	NA	UROBE1963355_EIv1.0_0012320	0.13021	0.15532	48
allind	UROBE1963355_EIv1.0_0012330	0	2	UROBE1963355_EIv1.0_0012330.1	High	protein_coding_gene	Elongator complex protein 4	IPR008728 (Elongator complex protein 4), IPR027417 (P-loop containing nucleoside triphosphate hydrolase)	None	84	1380	1	2	6.65187e-05	0.4696	-0.642967	UROBE1963355_EIv1.0_0012330	0.070992	0.17058	23
allind	UROBE1963355_EIv1.0_0012340	0	1	UROBE1963355_EIv1.0_0012340.1	Low	transposable_element_gene	Integrase catalytic domain-containing protein	None	GO:0000943, GO:0003676, GO:0015074	84	264	0	1	0	0.484849	NA	UROBE1963355_EIv1.0_0012340	0.12212	0.42028	26
allind	UROBE1963355_EIv1.0_0012350	0	1	UROBE1963355_EIv1.0_0012350.1	High	transposable_element_gene	Integrase catalytic domain-containing protein	None	GO:0000943, GO:0003676, GO:0015074	84	663	1	2	0.000719967	0.476047	1.64974	UROBE1963355_EIv1.0_0012350	0.1699	0.4773	36
allind	UROBE1963355_EIv1.0_0012360	0	3	UROBE1963355_EIv1.0_0012360.1	High	transposable_element_gene	Integrase catalytic domain-containing protein	None	GO:0000943, GO:0003676, GO:0015074	84	759	0	1	0	0.512517	NA	UROBE1963355_EIv1.0_0012360	0.10678	0.24857	13
allind	UROBE1963355_EIv1.0_0012370	0	1	UROBE1963355_EIv1.0_0012370.1	High	transposable_element_gene	Integrase catalytic domain-containing protein	None	GO:0000943, GO:0003676, GO:0015074	84	498	0	1	0	0.429719	NA	UROBE1963355_EIv1.0_0012370	0.09339	0.18153	12
allind	UROBE1963355_EIv1.0_0012380	0	1	UROBE1963355_EIv1.0_0012380.1	Low	transposable_element_gene	Integrase catalytic domain-containing protein	None	GO:0003676, GO:0008270, GO:0015074	84	516	1	2	0.000219594	0.47093	-0.515026	UROBE1963355_EIv1.0_0012380	0.18515	0.3909	15
allind	UROBE1963355_EIv1.0_0012390	0	1	UROBE1963355_EIv1.0_0012390.1	Low	predicted_gene	Unknown protein	None	None	84	192	1	2	0.000124008	0.59902	-1.04726	UROBE1963355_EIv1.0_0012390	0.20901	0.43036	13
allind	UROBE1963355_EIv1.0_0012400	0	1	UROBE1963355_EIv1.0_0012400.1	High	protein_coding_gene	Myb_DNA-bind_2 domain-containing protein	IPR009057 (Homeobox domain-like)	GO:0000723, GO:0003677	84	1800	0	1	0	0.47	NA	UROBE1963355_EIv1.0_0012400	0.15755	0.33112	14
allind	UROBE1963355_EIv1.0_0012410	0	2	UROBE1963355_EIv1.0_0012410.1	High	protein_coding_gene	MFS domain-containing protein	IPR005828 (Major facilitator, sugar transporter-like), IPR020846 (Major facilitator superfamily domain)	GO:0005215, GO:0016020, GO:0016021, GO:0022857, GO:0055085	84	1566	3	4	0.000520051	0.450154	0.663362	UROBE1963355_EIv1.0_0012410	0.087464	0.11644	29
allind	UROBE1963355_EIv1.0_0012420	0	2	UROBE1963355_EIv1.0_0012420.1	High	transposable_element_gene	Integrase catalytic domain-containing protein	IPR012337 (Ribonuclease H-like domain), IPR013103 (Reverse transcriptase, RNA-dependent DNA polymerase)	GO:0000943, GO:0003676, GO:0015074	84	3207	0	1	0	0.513876	NA	UROBE1963355_EIv1.0_0012420	0.07099	0.13907	10
allind	UROBE1963355_EIv1.0_0012430	0	2	UROBE1963355_EIv1.0_0012430.1	High	protein_coding_gene	40S ribosomal protein S22	IPR000630 (Ribosomal protein S8)	GO:0003735, GO:0005840, GO:0006412, GO:0022627	84	390	0	1	0	0.5	NA	UROBE1963355_EIv1.0_0012430	0.038737	0.10943	39
allind	UROBE1963355_EIv1.0_0012440	0	2	UROBE1963355_EIv1.0_0012440.1	High	protein_coding_gene	40S ribosomal protein S17	IPR001210 (Ribosomal protein S17e)	None	84	456	25	17	0.00524655	0.549081	-1.5875	UROBE1963355_EIv1.0_0012440	0.039374	0.11178	41
allind	UROBE1963355_EIv1.0_0012450	0	1	UROBE1963355_EIv1.0_0012450.1	Low	predicted_gene	Unknown protein	None	None	84	285	0	1	0	0.508772	NA	UROBE1963355_EIv1.0_0012450	0.03679	0.11008	43
allind	UROBE1963355_EIv1.0_0012460	0	3	UROBE1963355_EIv1.0_0012460.1	Low	protein_coding_gene	Unknown protein	None	None	84	222	0	1	0	0.405405	NA	UROBE1963355_EIv1.0_0012460	0.03679	0.11008	43
allind	UROBE1963355_EIv1.0_0012470	0	1	UROBE1963355_EIv1.0_0012470.1	Low	protein_coding_gene	Unknown protein	None	None	84	411	0	1	0	0.545012	NA	UROBE1963355_EIv1.0_0012470	0.032068	0.079105	43
allind	UROBE1963355_EIv1.0_0012480	0	1	UROBE1963355_EIv1.0_0012480.1	High	transposable_element_gene	Integrase catalytic domain-containing protein	None	GO:0000943, GO:0003676, GO:0015074	84	303	0	1	0	0.419142	NA	UROBE1963355_EIv1.0_0012480	0.10202	0.24764	8
allind	UROBE1963355_EIv1.0_0012490	0	1	UROBE1963355_EIv1.0_0012490.1	High	protein_coding_gene	Nuclear envelope pore membrane protein	None	None	84	4023	3	4	2.35308e-05	0.437991	-1.56095	UROBE1963355_EIv1.0_0012490	0.0082775	0.0095011	90
allind	UROBE1963355_EIv1.0_0012500	0	1	UROBE1963355_EIv1.0_0012500.1	Low	protein_coding_gene	Unknown protein	None	None	84	480	0	1	0	0.479167	NA	UROBE1963355_EIv1.0_0012500	0.074737	0.1696	11
allind	UROBE1963355_EIv1.0_0012510	0	2	UROBE1963355_EIv1.0_0012510.1	Low	predicted_gene	Unknown protein	None	None	84	231	0	1	0	0.545455	NA	UROBE1963355_EIv1.0_0012510	0.074737	0.1696	11
allind	UROBE1963355_EIv1.0_0012520	0	1	UROBE1963355_EIv1.0_0012520.1	Low	predicted_gene	Unknown protein	None	None	84	261	0	1	0	0.390805	NA	UROBE1963355_EIv1.0_0012520	0.068695	0.14868	13
allind	UROBE1963355_EIv1.0_0012530	0	2	UROBE1963355_EIv1.0_0012530.1	High	protein_coding_gene	Unknown protein	None	None	84	474	1	2	9.92517e-05	0.447308	-0.909084	UROBE1963355_EIv1.0_0012530	0.1449	0.37617	12
allind	UROBE1963355_EIv1.0_0012540	0	1	UROBE1963355_EIv1.0_0012540.1	High	protein_coding_gene	Unknown protein	None	None	84	223	0	1	0	0.399103	NA	UROBE1963355_EIv1.0_0012540	0.1449	0.37617	12
allind	UROBE1963355_EIv1.0_0012550	0	1	UROBE1963355_EIv1.0_0012550.1	High	transposable_element_gene	Integrase catalytic domain-containing protein	None	GO:0003676, GO:0015074	84	798	0	1	0	0.507519	NA	UROBE1963355_EIv1.0_0012550	0.11713	0.30787	24
allind	UROBE1963355_EIv1.0_0012560	0	3	UROBE1963355_EIv1.0_0012560.1	High	protein_coding_gene	Protein kinase C	IPR000008 (C2 domain), IPR000961 (AGC-kinase, C-terminal), IPR002219 (Protein kinase C-like, phorbol ester/diacylglycerol-binding domain), IPR011009 (Protein kinase-like domain), IPR011072 (HR1 rho-binding repeat)	GO:0000166, GO:0004672, GO:0004674, GO:0004697, GO:0005524, GO:0006468, GO:0007165, GO:0009272, GO:0016301, GO:0016310, GO:0016740, GO:0018105, GO:0035556, GO:0046872	84	3228	2	3	0.000193907	0.481944	0.899521	UROBE1963355_EIv1.0_0012560	0.30616	0.60738	8
allind	UROBE1963355_EIv1.0_0012570	0	3	UROBE1963355_EIv1.0_0012570.1	High	protein_coding_gene	Polar growth protein	None	None	84	1380	1	2	0.000112042	0.472403	-0.269379	UROBE1963355_EIv1.0_0012570	0.04742	0.11267	42
allind	UROBE1963355_EIv1.0_0012580	0	1	UROBE1963355_EIv1.0_0012580.1	High	transposable_element_gene	Integrase catalytic domain-containing protein	None	GO:0000943, GO:0003676, GO:0015074	84	1047	0	1	0	0.51767	NA	UROBE1963355_EIv1.0_0012580	0.14849	0.32134	13
allind	UROBE1963355_EIv1.0_0012590	0	1	UROBE1963355_EIv1.0_0012590.1	Low	transposable_element_gene	Integrase catalytic domain-containing protein	IPR012337 (Ribonuclease H-like domain)	GO:0000943, GO:0003676, GO:0015074	84	231	1	2	0.000397384	0.480313	-0.642967	UROBE1963355_EIv1.0_0012590	0.23358	0.62985	13
allind	UROBE1963355_EIv1.0_0012600	0	1	UROBE1963355_EIv1.0_0012600.1	High	transposable_element_gene	Integrase catalytic domain-containing protein	None	GO:0000943, GO:0003676, GO:0015074	84	384	12	7	0.00575442	0.419054	-0.214845	UROBE1963355_EIv1.0_0012600	0.11036	0.27513	56
allind	UROBE1963355_EIv1.0_0012610	0	2	UROBE1963355_EIv1.0_0012610.1	High	protein_coding_gene	Cell wall surface anchored protein	None	None	84	3198	2	3	1.48903e-05	0.469668	-1.40128	UROBE1963355_EIv1.0_0012610	0.046181	0.076937	61
allind	UROBE1963355_EIv1.0_0012620	0	1	UROBE1963355_EIv1.0_0012620.1	High	transposable_element_gene	Integrase catalytic domain-containing protein	IPR013103 (Reverse transcriptase, RNA-dependent DNA polymerase)	None	84	1968	1	2	1.20983e-05	0.499498	-1.04726	UROBE1963355_EIv1.0_0012620	0.1681	0.47246	15
allind	UROBE1963355_EIv1.0_0012630	0	1	UROBE1963355_EIv1.0_0012630.1	High	transposable_element_gene	Integrase catalytic domain-containing protein	None	None	84	477	0	1	0	0.501048	NA	UROBE1963355_EIv1.0_0012630	0.14014	0.49973	12
allind	UROBE1963355_EIv1.0_0012640	0	1	UROBE1963355_EIv1.0_0012640.1	High	protein_coding_gene	Unknown protein	None	None	84	1452	0	1	0	0.477273	NA	UROBE1963355_EIv1.0_0012640	0.067413	0.18297	15
allind	UROBE1963355_EIv1.0_0012650	0	1	UROBE1963355_EIv1.0_0012650.1	Low	transposable_element_gene	Unknown protein	None	None	84	162	0	1	0	0.41358	NA	UROBE1963355_EIv1.0_0012650	0.33472	0.73422	32
allind	UROBE1963355_EIv1.0_0012660	0	2	UROBE1963355_EIv1.0_0012660.1	High	protein_coding_gene	Bromo domain-containing protein	IPR001487 (Bromodomain)	None	84	2838	1	2	8.38954e-06	0.508813	-1.04726	UROBE1963355_EIv1.0_0012660	0.3309	0.65244	27
allind	UROBE1963355_EIv1.0_0012670	0	1	UROBE1963355_EIv1.0_0012670.1	Low	protein_coding_gene	Unknown protein	None	None	84	267	0	1	0	0.546817	NA	UROBE1963355_EIv1.0_0012670	0.27525	0.62538	22
allind	UROBE1963355_EIv1.0_0012680	0	2	UROBE1963355_EIv1.0_0012680.1	High	protein_coding_gene	Zz type zinc finger domain-containing protein	IPR000433 (Zinc finger, ZZ-type), IPR032350 (Next to BRCA1, central domain)	GO:0008270, GO:0016236, GO:0043130, GO:0046872	84	4677	3	4	0.000161617	0.501828	0.482509	UROBE1963355_EIv1.0_0012680	0.45883	0.79942	16
allind	UROBE1963355_EIv1.0_0012690	0	2	UROBE1963355_EIv1.0_0012690.1	High	protein_coding_gene	Ubiquitin-conjugating enzyme	IPR016135 (Ubiquitin-conjugating enzyme/RWD-like)	None	84	813	3	3	0.000145019	0.47723	-1.48914	UROBE1963355_EIv1.0_0012690	0.36214	0.73759	8
allind	UROBE1963355_EIv1.0_0012700	0	1	UROBE1963355_EIv1.0_0012700.1	High	transposable_element_gene	Reverse transcriptase domain-containing protein	None	None	84	924	3	4	0.00031977	0.510655	-0.940378	UROBE1963355_EIv1.0_0012700	0.25251	0.49252	60
allind	UROBE1963355_EIv1.0_0012710	0	2	UROBE1963355_EIv1.0_0012710.1	High	transposable_element_gene	Integrase catalytic domain-containing protein	None	GO:0003676, GO:0015074	84	582	1	2	0.000652093	0.539949	1.06803	UROBE1963355_EIv1.0_0012710	0.2039	0.42643	57
allind	UROBE1963355_EIv1.0_0012720	0	3	UROBE1963355_EIv1.0_0012720.1	High	protein_coding_gene	Pyruvate kinase	IPR001697 (Pyruvate kinase)	GO:0000287, GO:0003824, GO:0004743, GO:0006096, GO:0016301, GO:0016310, GO:0016740, GO:0030955	84	1599	14	8	0.000438097	0.50411	-2.09984	UROBE1963355_EIv1.0_0012720	0.098754	0.31328	31
allind	UROBE1963355_EIv1.0_0012730	0	1	UROBE1963355_EIv1.0_0012730.1	Low	predicted_gene	Unknown protein	None	None	84	297	0	1	0	0.484849	NA	UROBE1963355_EIv1.0_0012730	0.05549	0.21033	26
allind	UROBE1963355_EIv1.0_0012740	0	1	UROBE1963355_EIv1.0_0012740.1	High	protein_coding_gene	Myosin regulatory light chain cdc4	IPR011992 (EF-hand domain pair)	GO:0005509	84	429	0	1	0	0.494173	NA	UROBE1963355_EIv1.0_0012740	0.040816	0.091466	12
allind	UROBE1963355_EIv1.0_0012750	0	1	UROBE1963355_EIv1.0_0012750.1	High	protein_coding_gene	Isopentenyl-diphosphate Delta-isomerase	IPR011876 (Isopentenyl-diphosphate delta-isomerase, type 1), IPR015797 (NUDIX hydrolase domain-like)	GO:0004452, GO:0008299, GO:0009240, GO:0016787, GO:0016853, GO:0045337	84	885	0	1	0	0.467797	NA	UROBE1963355_EIv1.0_0012750	0.072492	0.29249	16
allind	UROBE1963355_EIv1.0_0012760	0	1	UROBE1963355_EIv1.0_0012760.1	High	transposable_element_gene	Integrase catalytic domain-containing protein	None	GO:0000943, GO:0003676, GO:0015074	84	627	2	3	7.59474e-05	0.437002	-1.40128	UROBE1963355_EIv1.0_0012760	0.090105	0.22501	24
allind	UROBE1963355_EIv1.0_0012770	0	1	UROBE1963355_EIv1.0_0012770.1	Low	predicted_gene	Unknown protein	None	None	84	174	0	1	0	0.413793	NA	UROBE1963355_EIv1.0_0012770	0.12869	0.23255	16
allind	UROBE1963355_EIv1.0_0012780	0	1	UROBE1963355_EIv1.0_0012780.1	High	protein_coding_gene	Unknown protein	None	None	84	1407	0	1	0	0.463397	NA	UROBE1963355_EIv1.0_0012780	0.1398	0.25986	20
allind	UROBE1963355_EIv1.0_0012790	0	1	UROBE1963355_EIv1.0_0012790.1	High	transposable_element_gene	Integrase catalytic domain-containing protein	None	GO:0000943, GO:0003676, GO:0015074	84	456	0	1	0	0.445175	NA	UROBE1963355_EIv1.0_0012790	0.099007	0.18652	28
allind	UROBE1963355_EIv1.0_0012800	0	1	UROBE1963355_EIv1.0_0012800.1	High	transposable_element_gene	Integrase catalytic domain-containing protein	IPR012337 (Ribonuclease H-like domain), IPR013103 (Reverse transcriptase, RNA-dependent DNA polymerase)	None	84	2046	1	2	0.000173155	0.482893	0.917915	UROBE1963355_EIv1.0_0012800	0.098903	0.16577	28
allind	UROBE1963355_EIv1.0_0012810	0	1	UROBE1963355_EIv1.0_0012810.1	High	transposable_element_gene	Integrase catalytic domain-containing protein	None	None	84	792	0	1	0	0.474747	NA	UROBE1963355_EIv1.0_0012810	0.0913	0.1441	27
allind	UROBE1963355_EIv1.0_0012820	0	1	UROBE1963355_EIv1.0_0012820.1	High	transposable_element_gene	Integrase catalytic domain-containing protein	None	GO:0000943, GO:0003676, GO:0015074	84	1239	2	3	0.000412812	0.546889	0.444155	UROBE1963355_EIv1.0_0012820	0.071021	0.075737	37
allind	UROBE1963355_EIv1.0_0012830	0	1	UROBE1963355_EIv1.0_0012830.1	High	transposable_element_gene	Integrase catalytic domain-containing protein	IPR013103 (Reverse transcriptase, RNA-dependent DNA polymerase)	GO:0000943, GO:0003676, GO:0015074	84	1494	2	3	6.2595e-05	0.536161	-1.21867	UROBE1963355_EIv1.0_0012830	0.025128	0.023862	50
allind	UROBE1963355_EIv1.0_0012840	0	1	UROBE1963355_EIv1.0_0012840.1	High	protein_coding_gene	EF-hand domain-containing protein	IPR006685 (Mechanosensitive ion channel MscS), IPR010920 (LSM domain), IPR011992 (EF-hand domain pair)	GO:0005509, GO:0016020, GO:0016021, GO:0055085	84	2970	2	3	0.000113103	0.508421	-0.254301	UROBE1963355_EIv1.0_0012840	0.02856	0.032506	32
allind	UROBE1963355_EIv1.0_0012850	0	4	UROBE1963355_EIv1.0_0012850.1	High	protein_coding_gene	AAA_16 domain-containing protein	IPR027417 (P-loop containing nucleoside triphosphate hydrolase)	None	84	1716	2	3	2.775e-05	0.527972	-1.40128	UROBE1963355_EIv1.0_0012850	0.052734	0.16425	8
allind	UROBE1963355_EIv1.0_0012860	0	1	UROBE1963355_EIv1.0_0012860.1	High	protein_coding_gene	Unplaced genomic scaffold CY34scaffold_40, whole genome shotgun sequence	IPR018466 (Kre9/Knh1 family)	None	84	447	0	1	0	0.511261	NA	UROBE1963355_EIv1.0_0012860	0.028543	0.045985	21
allind	UROBE1963355_EIv1.0_0012870	0	1	UROBE1963355_EIv1.0_0012870.1	High	protein_coding_gene	Protein kinase domain-containing protein	None	GO:0004672, GO:0004674, GO:0005524, GO:0006468	84	870	0	1	0	0.493103	NA	UROBE1963355_EIv1.0_0012870	0.03057	0.046322	19
allind	UROBE1963355_EIv1.0_0012880	0	1	UROBE1963355_EIv1.0_0012880.1	High	protein_coding_gene	Unknown protein	None	None	84	546	0	1	0	0.529304	NA	UROBE1963355_EIv1.0_0012880	0.0067473	0.0043996	3
allind	UROBE1963355_EIv1.0_0012890	0	1	UROBE1963355_EIv1.0_0012890.1	Low	protein_coding_gene	Unknown protein	None	None	84	189	0	1	0	0.428571	NA	UROBE1963355_EIv1.0_0012890	0.0010877	0.00047432	4
allind	UROBE1963355_EIv1.0_0012900	0	3	UROBE1963355_EIv1.0_0012900.1	High	protein_coding_gene	PP28 domain-containing protein	IPR019380 (Casein kinase substrate, phosphoprotein PP28)	None	84	672	0	1	0	0.498512	NA	UROBE1963355_EIv1.0_0012900	0.0010877	0.00047432	4
allind	UROBE1963355_EIv1.0_0012910	0	1	UROBE1963355_EIv1.0_0012910.1	High	protein_coding_gene	Unknown protein	None	None	84	3216	1	2	1.46285e-05	0.493152	-0.909084	UROBE1963355_EIv1.0_0012910	0.040814	0.20975	21
allind	UROBE1963355_EIv1.0_0012920	0	3	UROBE1963355_EIv1.0_0012920.1	High	protein_coding_gene	Unknown protein	None	None	84	666	0	1	0	0.566066	NA	UROBE1963355_EIv1.0_0012920	0.061835	0.23068	25
allind	UROBE1963355_EIv1.0_0012930	0	1	UROBE1963355_EIv1.0_0012930.1	Low	transposable_element_gene	Unknown protein	None	None	84	228	1	2	0.000104428	0.486894	-1.04726	UROBE1963355_EIv1.0_0012930	0.078482	0.25125	20
allind	UROBE1963355_EIv1.0_0012940	0	1	UROBE1963355_EIv1.0_0012940.1	High	transposable_element_gene	Reverse transcriptase domain-containing protein	None	None	84	1215	0	1	0	0.520988	NA	UROBE1963355_EIv1.0_0012940	0.13026	0.36564	21
allind	UROBE1963355_EIv1.0_0012950	0	1	UROBE1963355_EIv1.0_0012950.1	High	transposable_element_gene	Reverse transcriptase domain-containing protein	None	None	84	1137	0	1	0	0.578716	NA	UROBE1963355_EIv1.0_0012950	0.12337	0.37401	9
allind	UROBE1963355_EIv1.0_0012960	0	3	UROBE1963355_EIv1.0_0012960.1	High	protein_coding_gene	Proteasome subunit beta	IPR001353 (Proteasome, subunit alpha/beta), IPR029055 (Nucleophile aminohydrolases, N-terminal)	GO:0000502, GO:0004175, GO:0004298, GO:0005634, GO:0005737, GO:0005839, GO:0006508, GO:0008233, GO:0016787, GO:0051603	84	585	0	1	0	0.494017	NA	UROBE1963355_EIv1.0_0012960	0.06926	0.19329	36
allind	UROBE1963355_EIv1.0_0012970	0	4	UROBE1963355_EIv1.0_0012970.1	High	protein_coding_gene	Argininosuccinate lyase	IPR000362 (Fumarate lyase family), IPR008948 (L-Aspartase-like), IPR024083 (Fumarase/histidase, N-terminal), IPR029419 (Argininosuccinate lyase, C-terminal)	GO:0003824, GO:0004056, GO:0005737, GO:0005829, GO:0016829, GO:0042450	84	1395	0	1	0	0.474552	NA	UROBE1963355_EIv1.0_0012970	0.008959	0.0057846	30
allind	UROBE1963355_EIv1.0_0012980	0	4	UROBE1963355_EIv1.0_0012980.1	Low	protein_coding_gene	Unknown protein	None	None	84	333	0	1	0	0.498499	NA	UROBE1963355_EIv1.0_0012980	0.035196	0.060702	8
allind	UROBE1963355_EIv1.0_0012990	0	1	UROBE1963355_EIv1.0_0012990.1	High	protein_coding_gene	Glycosyltransferase family 25	None	GO:0016020, GO:0016021, GO:0016740	84	1386	1	2	0.000225184	0.473442	0.66715	UROBE1963355_EIv1.0_0012990	0.035196	0.060702	8
allind	UROBE1963355_EIv1.0_0013000	0	1	UROBE1963355_EIv1.0_0013000.1	Low	protein_coding_gene	Unknown protein	None	None	84	429	1	2	0.000109663	0.505883	-0.909084	UROBE1963355_EIv1.0_0013000	0.042494	0.062579	7
allind	UROBE1963355_EIv1.0_0013010	0	1	UROBE1963355_EIv1.0_0013010.1	High	protein_coding_gene	Invertase	IPR001362 (Glycoside hydrolase, family 32), IPR013320 (Concanavalin A-like lectin/glucanase domain), IPR023296 (Glycosyl hydrolase, five-bladed beta-propellor domain)	GO:0004553, GO:0004564, GO:0005975, GO:0008152, GO:0016787, GO:0016798	84	2394	2	3	8.27993e-05	0.512148	-0.80211	UROBE1963355_EIv1.0_0013010	0.042494	0.062579	7
allind	UROBE1963355_EIv1.0_0013020	0	2	UROBE1963355_EIv1.0_0013020.1	High	protein_coding_gene	Actin-like ATPase domain-containing protein	IPR013126 (Heat shock protein 70 family), IPR029047 (Heat shock protein 70kD, peptide-binding domain), IPR029048 (Heat shock protein 70kD, C-terminal domain)	None	84	2844	0	1	0	0.46308	NA	UROBE1963355_EIv1.0_0013020	0.062105	0.12952	5
allind	UROBE1963355_EIv1.0_0013030	0	1	UROBE1963355_EIv1.0_0013030.1	High	protein_coding_gene	TPR_REGION domain-containing protein	IPR011990 (Tetratricopeptide-like helical domain)	None	84	858	0	1	0	0.455711	NA	UROBE1963355_EIv1.0_0013030	0.069031	0.30209	21
allind	UROBE1963355_EIv1.0_0013040	0	3	UROBE1963355_EIv1.0_0013040.1	High	transposable_element_gene	Integrase catalytic domain-containing protein	None	GO:0000943, GO:0003676, GO:0015074	84	819	1	2	2.90715e-05	0.442002	-1.04726	UROBE1963355_EIv1.0_0013040	0.20631	0.29919	66
allind	UROBE1963355_EIv1.0_0013050	0	1	UROBE1963355_EIv1.0_0013050.1	High	transposable_element_gene	Integrase catalytic domain-containing protein	None	GO:0000943, GO:0003676, GO:0015074	84	894	42	30	0.0132114	0.522824	1.30081	UROBE1963355_EIv1.0_0013050	0.23127	0.28748	66
allind	UROBE1963355_EIv1.0_0013060	0	2	UROBE1963355_EIv1.0_0013060.1	Low	protein_coding_gene	Unknown protein	None	None	84	432	0	1	0	0.481482	NA	UROBE1963355_EIv1.0_0013060	0.15527	0.64932	7
allind	UROBE1963355_EIv1.0_0013070	0	2	UROBE1963355_EIv1.0_0013070.1	Low	transposable_element_gene	Unknown protein	None	None	84	237	0	1	0	0.476793	NA	UROBE1963355_EIv1.0_0013070	0.15157	0.62251	8
allind	UROBE1963355_EIv1.0_0013080	0	1	UROBE1963355_EIv1.0_0013080.1	High	transposable_element_gene	Integrase catalytic domain-containing protein	None	GO:0000943, GO:0003676, GO:0015074	84	381	0	1	0	0.409449	NA	UROBE1963355_EIv1.0_0013080	0.63477	0.83033	6
allind	UROBE1963355_EIv1.0_0013090	0	1	UROBE1963355_EIv1.0_0013090.1	High	transposable_element_gene	Integrase catalytic domain-containing protein	None	GO:0000943, GO:0003676, GO:0015074	84	1527	1	2	8.79183e-05	0.434138	-0.390496	UROBE1963355_EIv1.0_0013090	0.55921	0.7349	11
allind	UROBE1963355_EIv1.0_0013100	0	1	UROBE1963355_EIv1.0_0013100.1	High	transposable_element_gene	Integrase catalytic domain-containing protein	IPR013103 (Reverse transcriptase, RNA-dependent DNA polymerase)	GO:0000943, GO:0003676, GO:0015074	84	1152	4	4	0.00125079	0.445034	1.64017	UROBE1963355_EIv1.0_0013100	0.51198	0.71126	16
allind	UROBE1963355_EIv1.0_0013110	0	1	UROBE1963355_EIv1.0_0013110.1	Low	transposable_element_gene	Unknown protein	None	None	84	465	2	3	0.000102407	0.432207	-1.40128	UROBE1963355_EIv1.0_0013110	0.3111	0.62291	14
allind	UROBE1963355_EIv1.0_0013120	0	1	UROBE1963355_EIv1.0_0013120.1	Low	transposable_element_gene	Reverse transcriptase Ty1/copia-type domain-containing protein	None	None	84	327	1	2	0.000410554	0.415684	-0.390496	UROBE1963355_EIv1.0_0013120	0.30681	0.61083	15
allind	UROBE1963355_EIv1.0_0013130	0	1	UROBE1963355_EIv1.0_0013130.1	Low	transposable_element_gene	Integrase catalytic domain-containing protein	None	GO:0000943, GO:0003676, GO:0015074	84	318	0	1	0	0.462264	NA	UROBE1963355_EIv1.0_0013130	0.25111	0.53643	15
allind	UROBE1963355_EIv1.0_0013140	0	1	UROBE1963355_EIv1.0_0013140.1	Low	transposable_element_gene	Unknown protein	None	None	84	267	0	1	0	0.41573	NA	UROBE1963355_EIv1.0_0013140	0.27049	0.54041	14
allind	UROBE1963355_EIv1.0_0013150	0	1	UROBE1963355_EIv1.0_0013150.1	High	transposable_element_gene	Integrase catalytic domain-containing protein	None	GO:0000943, GO:0003676, GO:0015074	84	639	1	2	3.72606e-05	0.430379	-1.04726	UROBE1963355_EIv1.0_0013150	0.27939	0.61575	14
allind	UROBE1963355_EIv1.0_0013160	0	3	UROBE1963355_EIv1.0_0013160.1	High	transposable_element_gene	Integrase catalytic domain-containing protein	None	GO:0000943, GO:0003676, GO:0015074	84	360	0	1	0	0.477778	NA	UROBE1963355_EIv1.0_0013160	0.24076	0.60412	17
allind	UROBE1963355_EIv1.0_0013170	0	1	UROBE1963355_EIv1.0_0013170.1	Low	transposable_element_gene	Unknown protein	None	None	84	127	1	2	0.000892208	0.385358	-0.515026	UROBE1963355_EIv1.0_0013170	0.12719	0.45424	17
allind	UROBE1963355_EIv1.0_0013180	0	2	UROBE1963355_EIv1.0_0013180.1	High	protein_coding_gene	SANT/Myb domain	None	None	84	1518	0	1	0	0.517128	NA	UROBE1963355_EIv1.0_0013180	0.093582	0.23362	19
allind	UROBE1963355_EIv1.0_0013190	0	1	UROBE1963355_EIv1.0_0013190.1	High	transposable_element_gene	Integrase catalytic domain-containing protein	None	GO:0003676, GO:0015074	84	378	0	1	0	0.42328	NA	UROBE1963355_EIv1.0_0013190	0.22386	0.54467	14
allind	UROBE1963355_EIv1.0_0013200	0	1	UROBE1963355_EIv1.0_0013200.1	Low	transposable_element_gene	Unknown protein	None	None	84	183	0	1	0	0.448087	NA	UROBE1963355_EIv1.0_0013200	0.22127	0.60024	15
allind	UROBE1963355_EIv1.0_0013210	0	1	UROBE1963355_EIv1.0_0013210.1	High	transposable_element_gene	Integrase catalytic domain-containing protein	None	GO:0000943, GO:0003676, GO:0015074	84	852	1	2	8.18162e-05	0.423667	-0.774319	UROBE1963355_EIv1.0_0013210	0.25633	0.69146	16
allind	UROBE1963355_EIv1.0_0013220	0	1	UROBE1963355_EIv1.0_0013220.1	High	transposable_element_gene	Integrase catalytic domain-containing protein	None	GO:0000943, GO:0003676, GO:0015074	84	270	1	2	0.00187416	0.446296	1.82033	UROBE1963355_EIv1.0_0013220	0.24116	0.54409	15
allind	UROBE1963355_EIv1.0_0013230	0	1	UROBE1963355_EIv1.0_0013230.1	Low	transposable_element_gene	Unknown protein	None	None	84	246	0	1	0	0.313008	NA	UROBE1963355_EIv1.0_0013230	0.26047	0.52077	29
allind	UROBE1963355_EIv1.0_0013240	0	1	UROBE1963355_EIv1.0_0013240.1	High	protein_coding_gene	Unknown protein	None	None	84	2463	2	3	0.000126601	0.52829	-0.350168	UROBE1963355_EIv1.0_0013240	0.16205	0.43773	23
allind	UROBE1963355_EIv1.0_0013250	0	2	UROBE1963355_EIv1.0_0013250.1	High	transposable_element_gene	Integrase catalytic domain-containing protein	None	GO:0000943, GO:0003676, GO:0015074	84	589	0	1	0	0.453311	NA	UROBE1963355_EIv1.0_0013250	0.14567	0.30024	17
allind	UROBE1963355_EIv1.0_0013260	0	9	UROBE1963355_EIv1.0_0013260.1	High	protein_coding_gene	Unknown protein	None	None	84	2301	2	3	0.000162069	0.491018	-0.107078	UROBE1963355_EIv1.0_0013260	0.11541	0.29009	13
allind	UROBE1963355_EIv1.0_0013270	0	1	UROBE1963355_EIv1.0_0013270.1	Low	protein_coding_gene	Unknown protein	None	None	84	417	0	1	0	0.553957	NA	UROBE1963355_EIv1.0_0013270	0.090354	0.21476	10
allind	UROBE1963355_EIv1.0_0013280	0	2	UROBE1963355_EIv1.0_0013280.1	High	protein_coding_gene	Unknown protein	None	None	84	1692	0	1	0	0.45331	NA	UROBE1963355_EIv1.0_0013280	0.078583	0.13468	10
allind	UROBE1963355_EIv1.0_0013290	0	2	UROBE1963355_EIv1.0_0013290.1	High	protein_coding_gene	Unplaced genomic scaffold SPHSTscaffold_307, whole genome shotgun sequence	None	None	84	351	0	1	0	0.464388	NA	UROBE1963355_EIv1.0_0013290	0.10963	0.20861	6
allind	UROBE1963355_EIv1.0_0013300	0	1	UROBE1963355_EIv1.0_0013300.1	High	transposable_element_gene	Integrase catalytic domain-containing protein	IPR012337 (Ribonuclease H-like domain), IPR013103 (Reverse transcriptase, RNA-dependent DNA polymerase)	GO:0003676, GO:0008270, GO:0015074	84	1767	0	1	0	0.480475	NA	UROBE1963355_EIv1.0_0013300	0.096121	0.25589	23
allind	UROBE1963355_EIv1.0_0013310	0	4	UROBE1963355_EIv1.0_0013310.1	High	protein_coding_gene	Hydrolase_4 domain-containing protein	IPR029058 (Alpha/Beta hydrolase fold)	None	84	918	0	1	0	0.504357	NA	UROBE1963355_EIv1.0_0013310	0.081769	0.17758	20
allind	UROBE1963355_EIv1.0_0013320	0	4	UROBE1963355_EIv1.0_0013320.1	High	protein_coding_gene	HORMA domain-containing protein	IPR003511 (HORMA domain)	None	84	780	0	1	0	0.458974	NA	UROBE1963355_EIv1.0_0013320	0.025179	0.1007	8
allind	UROBE1963355_EIv1.0_0013330	0	1	UROBE1963355_EIv1.0_0013330.1	High	transposable_element_gene	Integrase catalytic domain-containing protein	IPR013103 (Reverse transcriptase, RNA-dependent DNA polymerase)	GO:0000943, GO:0003676, GO:0015074	84	1821	1	2	5.04095e-05	0.470071	-0.642967	UROBE1963355_EIv1.0_0013330	0.0063241	0.034201	25
allind	UROBE1963355_EIv1.0_0013340	0	1	UROBE1963355_EIv1.0_0013340.1	High	protein_coding_gene	Nuclear cap-binding protein subunit 2	IPR012677 (Nucleotide-binding alpha-beta plait domain), IPR027157 (Nuclear cap-binding protein subunit 2)	None	84	591	0	1	0	0.490694	NA	UROBE1963355_EIv1.0_0013340	0.11529	0.19682	10
allind	UROBE1963355_EIv1.0_0013350	0	1	UROBE1963355_EIv1.0_0013350.1	Low	protein_coding_gene	Unknown protein	None	None	84	321	0	1	0	0.492212	NA	UROBE1963355_EIv1.0_0013350	0.11529	0.19682	10
allind	UROBE1963355_EIv1.0_0013360	0	1	UROBE1963355_EIv1.0_0013360.1	High	transposable_element_gene	Integrase catalytic domain-containing protein	None	GO:0000943, GO:0003676, GO:0015074	84	618	0	1	0	0.430421	NA	UROBE1963355_EIv1.0_0013360	0.055143	0.10805	10
allind	UROBE1963355_EIv1.0_0013370	0	1	UROBE1963355_EIv1.0_0013370.1	High	transposable_element_gene	Integrase catalytic domain-containing protein	None	GO:0000943, GO:0003676, GO:0015074	84	1143	1	2	6.09864e-05	0.458474	-0.774319	UROBE1963355_EIv1.0_0013370	0.10558	0.30666	20
allind	UROBE1963355_EIv1.0_0013380	0	1	UROBE1963355_EIv1.0_0013380.1	Low	protein_coding_gene	Integrase catalytic domain-containing protein	None	GO:0000943, GO:0003676, GO:0015074	84	513	0	1	0	0.493177	NA	UROBE1963355_EIv1.0_0013380	0.25025	0.40763	10
allind	UROBE1963355_EIv1.0_0013390	0	1	UROBE1963355_EIv1.0_0013390.1	High	protein_coding_gene	Unknown protein	None	None	84	3723	0	1	0	0.467365	NA	UROBE1963355_EIv1.0_0013390	0.11317	0.18758	17
allind	UROBE1963355_EIv1.0_0013400	0	1	UROBE1963355_EIv1.0_0013400.1	High	transposable_element_gene	Integrase catalytic domain-containing protein	None	GO:0000943, GO:0003676, GO:0015074	84	336	1	2	0.000399557	0.508716	-0.390496	UROBE1963355_EIv1.0_0013400	0.060285	0.13157	22
allind	UROBE1963355_EIv1.0_0013410	0	1	UROBE1963355_EIv1.0_0013410.1	High	transposable_element_gene	Integrase catalytic domain-containing protein	None	GO:0000943, GO:0003676, GO:0015074	84	231	0	1	0	0.463203	NA	UROBE1963355_EIv1.0_0013410	0.064132	0.13467	19
allind	UROBE1963355_EIv1.0_0013420	0	1	UROBE1963355_EIv1.0_0013420.1	Low	transposable_element_gene	Unknown protein	None	None	84	282	1	2	0.00142719	0.33785	1.2045	UROBE1963355_EIv1.0_0013420	0.13293	0.26033	80
allind	UROBE1963355_EIv1.0_0013430	0	1	UROBE1963355_EIv1.0_0013430.1	High	transposable_element_gene	Integrase catalytic domain-containing protein	None	None	84	1176	0	1	0	0.582483	NA	UROBE1963355_EIv1.0_0013430	0.21522	0.48222	25
allind	UROBE1963355_EIv1.0_0013440	0	3	UROBE1963355_EIv1.0_0013440.1	High	protein_coding_gene	NADPH--cytochrome P450 reductase	IPR001094 (Flavodoxin-like), IPR023173 (NADPH-cytochrome p450 reductase, FAD-binding, alpha-helical domain-3), IPR029039 (Flavoprotein-like domain)	GO:0003958, GO:0005737, GO:0005739, GO:0005741, GO:0005783, GO:0005789, GO:0005886, GO:0006629, GO:0006694, GO:0006696, GO:0008202, GO:0010181, GO:0016020, GO:0016126, GO:0016491, GO:0050660, GO:0050661, GO:0055114	84	2262	0	1	0	0.462865	NA	UROBE1963355_EIv1.0_0013440	0.088836	0.44007	13
allind	UROBE1963355_EIv1.0_0013450	0	1	UROBE1963355_EIv1.0_0013450.1	Low	predicted_gene	Unknown protein	None	None	84	312	0	1	0	0.423077	NA	UROBE1963355_EIv1.0_0013450	0.11548	0.47858	9
allind	UROBE1963355_EIv1.0_0013460	0	3	UROBE1963355_EIv1.0_0013460.1	High	protein_coding_gene	N-acetyltransferase domain-containing protein	IPR016181 (Acyl-CoA N-acyltransferase)	None	84	1173	0	1	0	0.534527	NA	UROBE1963355_EIv1.0_0013460	0.11626	0.22353	6
allind	UROBE1963355_EIv1.0_0013470	0	1	UROBE1963355_EIv1.0_0013470.1	High	protein_coding_gene	DDE_3 domain-containing protein	None	None	84	534	0	1	0	0.543071	NA	UROBE1963355_EIv1.0_0013470	0.1076	0.17763	15
allind	UROBE1963355_EIv1.0_0013480	0	5	UROBE1963355_EIv1.0_0013480.1	High	protein_coding_gene	Adenylate cyclase	IPR000159 (Ras-associating (RA) domain), IPR001611 (Leucine-rich repeat), IPR001932 (PPM-type phosphatase domain), IPR003591 (Leucine-rich repeat, typical subtype), IPR029787 (Nucleotide cyclase), IPR032675 (Leucine-rich repeat domain, L domain-like)	None	84	6489	1	2	3.66921e-06	0.472956	-1.04726	UROBE1963355_EIv1.0_0013480	0.19015	0.37631	18
allind	UROBE1963355_EIv1.0_0013490	0	1	UROBE1963355_EIv1.0_0013490.1	High	transposable_element_gene	Integrase catalytic domain-containing protein	None	GO:0000943, GO:0003676, GO:0015074	84	624	1	2	3.81563e-05	0.440724	-1.04726	UROBE1963355_EIv1.0_0013490	0.17758	0.72919	6
allind	UROBE1963355_EIv1.0_0013500	0	2	UROBE1963355_EIv1.0_0013500.1	High	protein_coding_gene	Septin-type G domain-containing protein	IPR016491 (Septin), IPR027417 (P-loop containing nucleoside triphosphate hydrolase), IPR030379 (Septin-type guanine nucleotide-binding (G) domain)	GO:0000166, GO:0005525	84	1299	0	1	0	0.458815	NA	UROBE1963355_EIv1.0_0013500	0.20043	0.25362	3
allind	UROBE1963355_EIv1.0_0013510	0	1	UROBE1963355_EIv1.0_0013510.1	Low	predicted_gene	Unknown protein	None	None	84	219	0	1	0	0.461187	NA	UROBE1963355_EIv1.0_0013510	0.1445	0.14771	6
allind	UROBE1963355_EIv1.0_0013520	0	1	UROBE1963355_EIv1.0_0013520.1	High	protein_coding_gene	MICOS complex subunit	IPR019166 (MICOS complex subunit MIC26/MIC27)	None	84	633	0	1	0	0.481832	NA	UROBE1963355_EIv1.0_0013520	0.1445	0.14771	6
allind	UROBE1963355_EIv1.0_0013530	0	1	UROBE1963355_EIv1.0_0013530.1	High	protein_coding_gene	GMC_OxRdtase_N domain-containing protein	IPR012132 (Glucose-methanol-choline oxidoreductase), IPR023753 (FAD/NAD(P)-binding domain)	GO:0016614, GO:0050660, GO:0055114	84	1890	0	1	0	0.473016	NA	UROBE1963355_EIv1.0_0013530	0.08586	0.13585	11
allind	UROBE1963355_EIv1.0_0013540	0	1	UROBE1963355_EIv1.0_0013540.1	Low	predicted_gene	Unknown protein	None	None	84	233	0	1	0	0.433476	NA	UROBE1963355_EIv1.0_0013540	0.05264	0.047424	25
allind	UROBE1963355_EIv1.0_0013550	0	4	UROBE1963355_EIv1.0_0013550.1	High	protein_coding_gene	Adipose-regulatory protein, Seipin	IPR009617 (Seipin family)	GO:0016020, GO:0016021, GO:0019915	84	1308	0	1	0	0.497706	NA	UROBE1963355_EIv1.0_0013550	0.077811	0.15556	38
allind	UROBE1963355_EIv1.0_0013560	0	2	UROBE1963355_EIv1.0_0013560.1	High	protein_coding_gene	P-loop containing nucleoside triphosphate hydrolase	IPR003439 (ABC transporter-like), IPR027417 (P-loop containing nucleoside triphosphate hydrolase), IPR032781 (ABC-transporter extension domain)	GO:0000166, GO:0005524, GO:0005829, GO:0006448, GO:0016787, GO:0016887, GO:0022626, GO:0031369, GO:0042327, GO:0043022, GO:0071232, GO:0071264	84	2166	0	1	0	0.505078	NA	UROBE1963355_EIv1.0_0013560	0.038644	0.032362	36
allind	UROBE1963355_EIv1.0_0013570	0	1	UROBE1963355_EIv1.0_0013570.1	High	protein_coding_gene	Alpha-galactosidase	IPR008551 (Transport and Golgi organisation protein 2)	GO:0003824, GO:0004553, GO:0004557, GO:0005975, GO:0008152, GO:0016020, GO:0016021, GO:0016787, GO:0016798, GO:0052692	84	1074	0	1	0	0.461825	NA	UROBE1963355_EIv1.0_0013570	0.031953	0.019268	37
allind	UROBE1963355_EIv1.0_0013580	0	2	UROBE1963355_EIv1.0_0013580.1	High	protein_coding_gene	F-box domain-containing protein	IPR001810 (F-box domain), IPR011990 (Tetratricopeptide-like helical domain), IPR032675 (Leucine-rich repeat domain, L domain-like)	GO:0019005, GO:0031146	84	1971	0	1	0	0.473364	NA	UROBE1963355_EIv1.0_0013580	0.085567	0.17567	14
allind	UROBE1963355_EIv1.0_0013590	0	1	UROBE1963355_EIv1.0_0013590.1	Low	transposable_element_gene	Unknown protein	None	None	84	183	0	1	0	0.508197	NA	UROBE1963355_EIv1.0_0013590	0.14402	0.5364	12
allind	UROBE1963355_EIv1.0_0013600	0	1	UROBE1963355_EIv1.0_0013600.1	High	transposable_element_gene	Reverse transcriptase domain-containing protein	IPR000477 (Reverse transcriptase domain)	None	84	1098	1	2	2.16844e-05	0.493636	-1.04726	UROBE1963355_EIv1.0_0013600	0.21257	0.68209	9
allind	UROBE1963355_EIv1.0_0013610	0	1	UROBE1963355_EIv1.0_0013610.1	High	transposable_element_gene	Integrase catalytic domain-containing protein	None	GO:0003676, GO:0015074	84	282	0	1	0	0.553191	NA	UROBE1963355_EIv1.0_0013610	0.32133	0.66901	8
allind	UROBE1963355_EIv1.0_0013620	0	4	UROBE1963355_EIv1.0_0013620.1	High	transposable_element_gene	Integrase catalytic domain-containing protein	IPR013103 (Reverse transcriptase, RNA-dependent DNA polymerase)	GO:0000943, GO:0003676, GO:0015074	84	702	2	3	0.000336307	0.502663	-0.651463	UROBE1963355_EIv1.0_0013620	0.15678	0.39504	21
allind	UROBE1963355_EIv1.0_0013630	0	1	UROBE1963355_EIv1.0_0013630.1	High	transposable_element_gene	Integrase catalytic domain-containing protein	IPR026523 (Paraneoplastic antigen Ma)	GO:0003676, GO:0015074	84	1902	3	4	0.000346587	0.515159	0.183747	UROBE1963355_EIv1.0_0013630	0.062526	0.15498	15
allind	UROBE1963355_EIv1.0_0013640	0	1	UROBE1963355_EIv1.0_0013640.1	High	transposable_element_gene	Integrase catalytic domain-containing protein	None	GO:0000943, GO:0003676, GO:0015074	84	327	0	1	0	0.452599	NA	UROBE1963355_EIv1.0_0013640	0.10931	0.25915	25
allind	UROBE1963355_EIv1.0_0013650	0	1	UROBE1963355_EIv1.0_0013650.1	High	transposable_element_gene	Integrase catalytic domain-containing protein	IPR025724 (GAG-pre-integrase domain)	GO:0000943, GO:0003676, GO:0015074	84	1152	2	3	4.1336e-05	0.479187	-1.40128	UROBE1963355_EIv1.0_0013650	0.011634	0.010125	17
allind	UROBE1963355_EIv1.0_0013660	0	1	UROBE1963355_EIv1.0_0013660.1	High	transposable_element_gene	Integrase catalytic domain-containing protein	None	GO:0000943, GO:0003676, GO:0015074	84	213	0	1	0	0.488263	NA	UROBE1963355_EIv1.0_0013660	0.009579	0.011531	16
allind	UROBE1963355_EIv1.0_0013670	0	1	UROBE1963355_EIv1.0_0013670.1	High	transposable_element_gene	Reverse transcriptase domain-containing protein	IPR000477 (Reverse transcriptase domain)	None	84	714	0	1	0	0.508403	NA	UROBE1963355_EIv1.0_0013670	0.027215	0.079522	36
allind	UROBE1963355_EIv1.0_0013680	0	3	UROBE1963355_EIv1.0_0013680.1	High	protein_coding_gene	UDG domain-containing protein	IPR005122 (Uracil-DNA glycosylase-like), IPR015637 (G/U mismatch-specific DNA glycosylase)	None	84	1176	0	1	0	0.460884	NA	UROBE1963355_EIv1.0_0013680	0.13764	0.34776	11
allind	UROBE1963355_EIv1.0_0013690	0	1	UROBE1963355_EIv1.0_0013690.1	High	transposable_element_gene	Integrase catalytic domain-containing protein	None	GO:0000943, GO:0003676, GO:0015074	84	696	0	1	0	0.399425	NA	UROBE1963355_EIv1.0_0013690	0.11304	0.30128	12
allind	UROBE1963355_EIv1.0_0013700	0	1	UROBE1963355_EIv1.0_0013700.1	High	protein_coding_gene	Integrase catalytic domain-containing protein	IPR032741 (Protein Sls1)	None	84	1809	1	2	2.60063e-05	0.490339	-0.909084	UROBE1963355_EIv1.0_0013700	0.083733	0.23083	16
allind	UROBE1963355_EIv1.0_0013710	0	1	UROBE1963355_EIv1.0_0013710.1	Low	protein_coding_gene	Unknown protein	None	None	84	270	0	1	0	0.47037	NA	UROBE1963355_EIv1.0_0013710	0.06673	0.094714	6
allind	UROBE1963355_EIv1.0_0013720	0	1	UROBE1963355_EIv1.0_0013720.1	High	protein_coding_gene	Mitochondrial glycine transporter	IPR018108 (Mitochondrial substrate/solute carrier), IPR023395 (Mitochondrial carrier domain)	GO:0005739, GO:0005743, GO:0015187, GO:0016020, GO:0016021, GO:0022857, GO:1904983	84	939	0	1	0	0.56869	NA	UROBE1963355_EIv1.0_0013720	0.14067	0.3971	7
allind	UROBE1963355_EIv1.0_0013730	0	4	UROBE1963355_EIv1.0_0013730.1	High	protein_coding_gene	PH domain-containing protein	None	GO:0016020, GO:0016021	84	219	0	1	0	0.525114	NA	UROBE1963355_EIv1.0_0013730	0.17456	0.25285	16
allind	UROBE1963355_EIv1.0_0013740	0	1	UROBE1963355_EIv1.0_0013740.1	High	protein_coding_gene	Unplaced genomic scaffold supercont1.2, whole genome shotgun sequence	None	None	84	1326	1	2	1.79559e-05	0.492468	-1.04726	UROBE1963355_EIv1.0_0013740	0.11786	0.20384	28
allind	UROBE1963355_EIv1.0_0013750	0	3	UROBE1963355_EIv1.0_0013750.1	High	protein_coding_gene	WD_REPEATS_REGION domain-containing protein	IPR015943 (WD40/YVTN repeat-like-containing domain)	None	84	1761	1	2	0.00026764	0.504617	1.61391	UROBE1963355_EIv1.0_0013750	0.1067	0.20955	31
allind	UROBE1963355_EIv1.0_0013760	0	1	UROBE1963355_EIv1.0_0013760.1	Low	predicted_gene	Unknown protein	None	None	84	399	1	2	0.000437123	0.425826	-0.151673	UROBE1963355_EIv1.0_0013760	0.084086	0.10754	20
allind	UROBE1963355_EIv1.0_0013770	0	1	UROBE1963355_EIv1.0_0013770.1	High	protein_coding_gene	P-loop containing nucleoside triphosphate hydrolase protein	IPR026681 (Nicotinamide riboside kinase), IPR027417 (P-loop containing nucleoside triphosphate hydrolase)	None	84	795	2	3	0.000319697	0.49419	-0.579563	UROBE1963355_EIv1.0_0013770	0.047048	0.068577	19
allind	UROBE1963355_EIv1.0_0013780	0	2	UROBE1963355_EIv1.0_0013780.1	Low	predicted_gene	Unknown protein	None	None	84	441	0	1	0	0.573696	NA	UROBE1963355_EIv1.0_0013780	0.042712	0.075394	20
allind	UROBE1963355_EIv1.0_0013790	0	1	UROBE1963355_EIv1.0_0013790.1	High	protein_coding_gene	40S ribosomal protein S8	IPR022309 (Ribosomal protein S8e/ribosomal biogenesis NSA2)	GO:0003735, GO:0005840, GO:0006412	84	639	1	2	0.000177325	0.541564	-0.515026	UROBE1963355_EIv1.0_0013790	0.033278	0.05338	21
allind	UROBE1963355_EIv1.0_0013800	0	1	UROBE1963355_EIv1.0_0013800.1	Low	protein_coding_gene	T-complex protein 1, theta subunit	IPR002423 (Chaperonin Cpn60/TCP-1 family), IPR027410 (TCP-1-like chaperonin intermediate domain)	GO:0000166, GO:0005524, GO:0005737, GO:0006457, GO:0051082	84	522	0	1	0	0.538314	NA	UROBE1963355_EIv1.0_0013800	0.08769	0.21436	20
allind	UROBE1963355_EIv1.0_0013810	0	7	UROBE1963355_EIv1.0_0013810.1	High	protein_coding_gene	Nicotinate-nucleotide pyrophosphorylase [carboxylating]	IPR027277 (Nicotinate-nucleotide pyrophosphorylase/Putative pyrophosphorylase ModD)	GO:0003824, GO:0004514, GO:0009435, GO:0016740, GO:0016757, GO:0016763, GO:0019363	84	924	0	1	0	0.445887	NA	UROBE1963355_EIv1.0_0013810	0.081925	0.21521	28
allind	UROBE1963355_EIv1.0_0013820	0	1	UROBE1963355_EIv1.0_0013820.1	High	transposable_element_gene	Integrase catalytic domain-containing protein	None	GO:0000943, GO:0003676, GO:0015074	84	288	0	1	0	0.40625	NA	UROBE1963355_EIv1.0_0013820	0.31361	0.55514	28
allind	UROBE1963355_EIv1.0_0013830	0	2	UROBE1963355_EIv1.0_0013830.1	High	protein_coding_gene	RNA-binding domain protein	IPR012677 (Nucleotide-binding alpha-beta plait domain)	GO:0003676, GO:0003723	84	1011	0	1	0	0.553907	NA	UROBE1963355_EIv1.0_0013830	0.3518	0.58665	15
allind	UROBE1963355_EIv1.0_0013840	0	2	UROBE1963355_EIv1.0_0013840.1	High	protein_coding_gene	Metallophos domain-containing protein	IPR029052 (Metallo-dependent phosphatase-like)	GO:0016020, GO:0016021, GO:0016787	84	1239	1	2	1.92167e-05	0.485059	-1.04726	UROBE1963355_EIv1.0_0013840	0.12193	0.30374	20
allind	UROBE1963355_EIv1.0_0013850	0	4	UROBE1963355_EIv1.0_0013850.1	High	protein_coding_gene	Ribonuclease T2-like	IPR001568 (Ribonuclease T2-like)	None	84	1002	0	1	0	0.533932	NA	UROBE1963355_EIv1.0_0013850	0.15219	0.3402	15
allind	UROBE1963355_EIv1.0_0013860	0	1	UROBE1963355_EIv1.0_0013860.1	High	protein_coding_gene	Inorganic phosphate transporter PHO88	IPR019263 (Inorganic phosphate transporter Pho88)	GO:0005783, GO:0016020, GO:0016021, GO:0045047	84	555	0	1	0	0.446847	NA	UROBE1963355_EIv1.0_0013860	0.07037	0.21863	15
allind	UROBE1963355_EIv1.0_0013870	0	2	UROBE1963355_EIv1.0_0013870.1	High	transposable_element_gene	Reverse transcriptase domain-containing protein	None	None	84	1056	1	2	2.25469e-05	0.535049	-1.04726	UROBE1963355_EIv1.0_0013870	0.14794	0.34794	12
allind	UROBE1963355_EIv1.0_0013880	0	1	UROBE1963355_EIv1.0_0013880.1	High	transposable_element_gene	Reverse transcriptase domain-containing protein	IPR000477 (Reverse transcriptase domain)	None	84	714	0	1	0	0.511204	NA	UROBE1963355_EIv1.0_0013880	0.19692	0.35728	11
allind	UROBE1963355_EIv1.0_0013890	0	1	UROBE1963355_EIv1.0_0013890.1	High	transposable_element_gene	Integrase catalytic domain-containing protein	IPR012337 (Ribonuclease H-like domain)	GO:0003676, GO:0015074	84	393	1	2	0.00126132	0.505271	1.75891	UROBE1963355_EIv1.0_0013890	0.16891	0.34244	13
allind	UROBE1963355_EIv1.0_0013900	1	1	UROBE1963355_EIv1.0_0013900.1	High	transposable_element_gene	Integrase catalytic domain-containing protein	IPR012337 (Ribonuclease H-like domain)	GO:0000943, GO:0003676, GO:0015074	84	558	0	1	0	0.473118	NA	UROBE1963355_EIv1.0_0013900	0.035883	0.080923	14
allind	UROBE1963355_EIv1.0_0013910	0	1	UROBE1963355_EIv1.0_0013910.1	High	transposable_element_gene	Integrase catalytic domain-containing protein	IPR012337 (Ribonuclease H-like domain)	GO:0000943, GO:0003676, GO:0015074	84	1098	2	3	0.000105287	0.466248	-1.13079	UROBE1963355_EIv1.0_0013910	0.090612	0.31196	22
allind	UROBE1963355_EIv1.0_0013920	0	3	UROBE1963355_EIv1.0_0013920.1	Low	protein_coding_gene	Unknown protein	None	None	84	645	0	1	0	0.506977	NA	UROBE1963355_EIv1.0_0013920	0.019098	0.024955	47
allind	UROBE1963355_EIv1.0_0013930	0	6	UROBE1963355_EIv1.0_0013930.1	High	protein_coding_gene	DUF1752 domain-containing protein	IPR013860 (Protein of unknown function DUF1752, fungi)	None	84	3342	3	4	0.000151156	0.531628	-0.292321	UROBE1963355_EIv1.0_0013930	0.012404	0.020567	52
allind	UROBE1963355_EIv1.0_0013940	0	2	UROBE1963355_EIv1.0_0013940.1	High	protein_coding_gene	Lipase_GDSL domain-containing protein	IPR013830 (SGNH hydrolase-type esterase domain)	GO:0016788	84	939	1	2	2.53563e-05	0.521819	-1.04726	UROBE1963355_EIv1.0_0013940	0.098299	0.14929	27
allind	UROBE1963355_EIv1.0_0013950	0	2	UROBE1963355_EIv1.0_0013950.1	High	protein_coding_gene	WD_REPEATS_REGION domain-containing protein	IPR015943 (WD40/YVTN repeat-like-containing domain)	None	84	1512	2	4	0.000621913	0.531715	2.15035	UROBE1963355_EIv1.0_0013950	0.073903	0.06012	11
allind	UROBE1963355_EIv1.0_0013960	0	1	UROBE1963355_EIv1.0_0013960.1	Low	predicted_gene	Unknown protein	None	None	84	198	0	1	0	0.550505	NA	UROBE1963355_EIv1.0_0013960	0.077363	0.061661	10
allind	UROBE1963355_EIv1.0_0013970	0	3	UROBE1963355_EIv1.0_0013970.1	High	protein_coding_gene	HABP4_PAI-RBP1 domain-containing protein	IPR006861 (Hyaluronan/mRNA-binding protein)	None	84	1074	0	1	0	0.562384	NA	UROBE1963355_EIv1.0_0013970	0.050445	0.064161	10
allind	UROBE1963355_EIv1.0_0013980	0	4	UROBE1963355_EIv1.0_0013980.1	High	protein_coding_gene	Structural maintenance of chromosomes protein 5	IPR003395 (RecF/RecN/SMC, N-terminal), IPR027131 (Structural maintenance of chromosomes protein 5), IPR027417 (P-loop containing nucleoside triphosphate hydrolase)	None	84	3552	3	4	0.00015716	0.457093	-0.128313	UROBE1963355_EIv1.0_0013980	0.017541	0.0243	30
allind	UROBE1963355_EIv1.0_0013990	0	2	UROBE1963355_EIv1.0_0013990.1	High	protein_coding_gene	Unknown protein	None	None	84	396	1	2	0.000390451	0.401726	-0.269379	UROBE1963355_EIv1.0_0013990	0.05181	0.099041	12
allind	UROBE1963355_EIv1.0_0014000	0	1	UROBE1963355_EIv1.0_0014000.1	High	transposable_element_gene	Integrase catalytic domain-containing protein	None	GO:0000943, GO:0003676, GO:0015074	84	813	0	1	0	0.494465	NA	UROBE1963355_EIv1.0_0014000	0.10438	0.18952	16
allind	UROBE1963355_EIv1.0_0014010	0	1	UROBE1963355_EIv1.0_0014010.1	High	protein_coding_gene	Unplaced genomic scaffold CY34scaffold_39, whole genome shotgun sequence	None	None	84	603	2	3	0.000191717	0.537254	-1.13079	UROBE1963355_EIv1.0_0014010	0.074255	0.19959	17
allind	UROBE1963355_EIv1.0_0014020	0	1	UROBE1963355_EIv1.0_0014020.1	High	protein_coding_gene	WD40-repeat-containing domain protein	IPR001810 (F-box domain), IPR015943 (WD40/YVTN repeat-like-containing domain), IPR020472 (G-protein beta WD-40 repeat)	None	84	1374	1	2	0.000216086	0.55955	0.576738	UROBE1963355_EIv1.0_0014020	0.078517	0.18551	14
allind	UROBE1963355_EIv1.0_0014030	1	2	UROBE1963355_EIv1.0_0014030.1	High	protein_coding_gene	Unknown protein	None	None	84	561	0	1	0	0.463458	NA	UROBE1963355_EIv1.0_0014030	0.056074	0.057475	7
allind	UROBE1963355_EIv1.0_0014040	0	1	UROBE1963355_EIv1.0_0014040.1	High	protein_coding_gene	RING-type domain-containing protein	IPR013083 (Zinc finger, RING/FYVE/PHD-type)	GO:0016020, GO:0016021	84	1137	2	3	0.000392574	0.488901	0.185087	UROBE1963355_EIv1.0_0014040	0.054709	0.056844	37
allind	UROBE1963355_EIv1.0_0014050	0	1	UROBE1963355_EIv1.0_0014050.1	High	protein_coding_gene	SANT_DAMP1_like domain-containing protein	None	GO:0006281, GO:0006338, GO:0035267, GO:0043967, GO:0043968	84	594	0	1	0	0.518518	NA	UROBE1963355_EIv1.0_0014050	0.075713	0.14081	17
allind	UROBE1963355_EIv1.0_0014060	0	1	UROBE1963355_EIv1.0_0014060.1	High	protein_coding_gene	Unknown protein	None	None	84	939	1	2	5.01015e-05	0.532507	-0.909084	UROBE1963355_EIv1.0_0014060	0.062007	0.13632	14
allind	UROBE1963355_EIv1.0_0014070	0	3	UROBE1963355_EIv1.0_0014070.1	High	protein_coding_gene	Tubulin-tyrosine ligase family-domain-containing protein	IPR004344 (Tubulin-tyrosine ligase/Tubulin polyglutamylase)	None	84	1446	1	2	3.25348e-05	0.486185	-0.909084	UROBE1963355_EIv1.0_0014070	0.084823	0.24308	20
allind	UROBE1963355_EIv1.0_0014080	0	2	UROBE1963355_EIv1.0_0014080.1	High	protein_coding_gene	PfkB domain-containing protein	IPR007342 (Pseudouridine-5'-phosphate glycosidase), IPR029056 (Ribokinase-like)	GO:0016798	84	2334	1	2	1.02012e-05	0.494864	-1.04726	UROBE1963355_EIv1.0_0014080	0.10321	0.25524	19
allind	UROBE1963355_EIv1.0_0014090	0	1	UROBE1963355_EIv1.0_0014090.1	Low	predicted_gene	Unknown protein	None	None	84	156	0	1	0	0.442308	NA	UROBE1963355_EIv1.0_0014090	0.09143	0.2583	16
allind	UROBE1963355_EIv1.0_0014100	0	1	UROBE1963355_EIv1.0_0014100.1	Low	predicted_gene	Unknown protein	None	None	84	264	0	1	0	0.55303	NA	UROBE1963355_EIv1.0_0014100	0.11053	0.26818	16
allind	UROBE1963355_EIv1.0_0014110	0	1	UROBE1963355_EIv1.0_0014110.1	High	transposable_element_gene	Integrase catalytic domain-containing protein	None	GO:0000943, GO:0003676, GO:0015074	84	642	0	1	0	0.556075	NA	UROBE1963355_EIv1.0_0014110	0.012636	-0.00034429	27
allind	UROBE1963355_EIv1.0_0014120	0	2	UROBE1963355_EIv1.0_0014120.1	High	transposable_element_gene	Integrase catalytic domain-containing protein	None	GO:0000943, GO:0003676, GO:0015074	84	345	1	2	0.000136363	0.498482	-0.909084	UROBE1963355_EIv1.0_0014120	0.014237	0.0087299	28
allind	UROBE1963355_EIv1.0_0014130	0	1	UROBE1963355_EIv1.0_0014130.1	High	transposable_element_gene	CxC1 domain-containing protein	None	None	84	1284	5	5	0.00060098	0.423268	-0.500227	UROBE1963355_EIv1.0_0014130	0.051164	0.039923	30
allind	UROBE1963355_EIv1.0_0014140	0	2	UROBE1963355_EIv1.0_0014140.1	High	protein_coding_gene	C2H2-type domain-containing protein	IPR015880 (Zinc finger, C2H2-like)	GO:0003676	84	1068	0	1	0	0.589888	NA	UROBE1963355_EIv1.0_0014140	0.27198	0.40562	15
allind	UROBE1963355_EIv1.0_0014150	0	1	UROBE1963355_EIv1.0_0014150.1	High	protein_coding_gene	Related to ATPase family protein	IPR005654 (ATPase, AFG1-like)	GO:0005524	84	359	0	1	0	0.501393	NA	UROBE1963355_EIv1.0_0014150	0.25416	0.60976	20
allind	UROBE1963355_EIv1.0_0014160	0	2	UROBE1963355_EIv1.0_0014160.1	Low	protein_coding_gene	Unknown protein	None	None	84	606	1	2	3.92896e-05	0.453815	-1.04726	UROBE1963355_EIv1.0_0014160	0.23616	0.51443	28
allind	UROBE1963355_EIv1.0_0014170	0	1	UROBE1963355_EIv1.0_0014170.1	High	transposable_element_gene	Reverse transcriptase domain-containing protein	None	None	84	1914	3	4	8.40802e-05	0.542879	-1.35616	UROBE1963355_EIv1.0_0014170	0.24419	0.49564	12
allind	UROBE1963355_EIv1.0_0014180	0	1	UROBE1963355_EIv1.0_0014180.1	High	protein_coding_gene	Unknown protein	None	None	84	1521	3	4	0.00031006	0.469365	-0.396046	UROBE1963355_EIv1.0_0014180	0.13521	0.31801	34
allind	UROBE1963355_EIv1.0_0014190	0	1	UROBE1963355_EIv1.0_0014190.1	Low	transposable_element_gene	Pkinase-domain-containing protein	None	GO:0004672, GO:0005524, GO:0006468, GO:0016301, GO:0016310, GO:0035556, GO:0046872	84	408	3	4	0.00017507	0.654383	-1.63276	UROBE1963355_EIv1.0_0014190	0.12463	0.30013	45
allind	UROBE1963355_EIv1.0_0014200	0	1	UROBE1963355_EIv1.0_0014200.1	High	transposable_element_gene	Integrase catalytic domain-containing protein	IPR012337 (Ribonuclease H-like domain), IPR013103 (Reverse transcriptase, RNA-dependent DNA polymerase)	GO:0000943, GO:0003676, GO:0015074	84	1788	0	1	0	0.417785	NA	UROBE1963355_EIv1.0_0014200	0.0052557	0.0018608	34
allind	UROBE1963355_EIv1.0_0014210	0	1	UROBE1963355_EIv1.0_0014210.1	High	transposable_element_gene	Integrase catalytic domain-containing protein	None	GO:0000943, GO:0003676, GO:0015074	84	465	0	1	0	0.423656	NA	UROBE1963355_EIv1.0_0014210	0.0035642	0.00075795	33
allind	UROBE1963355_EIv1.0_0014220	0	2	UROBE1963355_EIv1.0_0014220.1	High	protein_coding_gene	Unknown protein	None	None	84	1338	1	2	1.77949e-05	0.454419	-1.04726	UROBE1963355_EIv1.0_0014220	0.00013994	-0.006217	22
allind	UROBE1963355_EIv1.0_0014230	0	1	UROBE1963355_EIv1.0_0014230.1	High	protein_coding_gene	4-hydroxybenzoate polyprenyltransferase, mitochondrial	IPR000537 (UbiA prenyltransferase family)	GO:0002083, GO:0002094, GO:0004659, GO:0005739, GO:0005743, GO:0006744, GO:0008299, GO:0016020, GO:0016021, GO:0016740, GO:0016765, GO:0031305, GO:0047293	84	1212	0	1	0	0.507426	NA	UROBE1963355_EIv1.0_0014230	0.023799	0.037003	13
allind	UROBE1963355_EIv1.0_0014240	0	1	UROBE1963355_EIv1.0_0014240.1	High	protein_coding_gene	Rhodanese domain-containing protein	IPR000751 (M-phase inducer phosphatase)	GO:0004725, GO:0006470, GO:0035335, GO:1902751	84	2700	2	3	2.62425e-05	0.518893	-1.30883	UROBE1963355_EIv1.0_0014240	0.014372	0.012627	57
allind	UROBE1963355_EIv1.0_0014250	0	1	UROBE1963355_EIv1.0_0014250.1	High	protein_coding_gene	Secreted protein	None	None	84	558	0	1	0	0.514337	NA	UROBE1963355_EIv1.0_0014250	0.17145	0.68064	10
allind	UROBE1963355_EIv1.0_0014260	0	1	UROBE1963355_EIv1.0_0014260.1	High	transposable_element_gene	Reverse transcriptase domain-containing protein	None	None	84	1008	0	1	0	0.505952	NA	UROBE1963355_EIv1.0_0014260	0.068732	0.18102	31
allind	UROBE1963355_EIv1.0_0014270	0	1	UROBE1963355_EIv1.0_0014270.1	Low	protein_coding_gene	Unknown protein	None	None	84	408	0	1	0	0.485294	NA	UROBE1963355_EIv1.0_0014270	0.11449	0.23299	18
allind	UROBE1963355_EIv1.0_0014280	0	1	UROBE1963355_EIv1.0_0014280.1	High	transposable_element_gene	Integrase catalytic domain-containing protein	None	GO:0000943, GO:0003676, GO:0015074	84	582	1	2	0.000230672	0.450049	-0.390496	UROBE1963355_EIv1.0_0014280	0.11329	0.21452	22
allind	UROBE1963355_EIv1.0_0014290	0	1	UROBE1963355_EIv1.0_0014290.1	Low	transposable_element_gene	Unknown protein	None	None	84	282	0	1	0	0.485816	NA	UROBE1963355_EIv1.0_0014290	0.10512	0.19057	16
allind	UROBE1963355_EIv1.0_0014300	0	1	UROBE1963355_EIv1.0_0014300.1	Low	transposable_element_gene	Integrase catalytic domain-containing protein	IPR013103 (Reverse transcriptase, RNA-dependent DNA polymerase)	GO:0000943, GO:0003676, GO:0015074	84	207	0	1	0	0.429952	NA	UROBE1963355_EIv1.0_0014300	0.052568	0.043439	38
allind	UROBE1963355_EIv1.0_0014310	0	1	UROBE1963355_EIv1.0_0014310.1	High	transposable_element_gene	Integrase catalytic domain-containing protein	None	GO:0000943, GO:0003676, GO:0015074	84	642	1	2	7.32793e-05	0.46258	-0.909084	UROBE1963355_EIv1.0_0014310	0.12267	0.32747	14
allind	UROBE1963355_EIv1.0_0014320	0	2	UROBE1963355_EIv1.0_0014320.1	High	protein_coding_gene	AA_TRNA_LIGASE_II domain-containing protein	IPR002317 (Serine-tRNA ligase, type1)	GO:0000166, GO:0004812, GO:0004828, GO:0005524, GO:0005737, GO:0006418, GO:0006434	84	1788	1	2	3.89862e-05	0.545322	-0.774319	UROBE1963355_EIv1.0_0014320	0.052886	0.059926	46
allind	UROBE1963355_EIv1.0_0014330	0	2	UROBE1963355_EIv1.0_0014330.1	High	protein_coding_gene	Dol-P-Glc:Glc(2)Man(9)GlcNAc(2)-PP-Dol alpha-1,2-glucosyltransferase	IPR016900 (Alpha-2-glucosyltransferase Alg10)	None	84	1527	1	2	1.55924e-05	0.461027	-1.04726	UROBE1963355_EIv1.0_0014330	0.16965	0.33667	13
allind	UROBE1963355_EIv1.0_0014340	0	1	UROBE1963355_EIv1.0_0014340.1	Low	transposable_element_gene	Unknown protein	None	None	84	255	0	1	0	0.439216	NA	UROBE1963355_EIv1.0_0014340	0.092893	0.22169	32
allind	UROBE1963355_EIv1.0_0014350	0	1	UROBE1963355_EIv1.0_0014350.1	High	transposable_element_gene	Integrase catalytic domain-containing protein	IPR001878 (Zinc finger, CCHC-type)	GO:0000943, GO:0003676, GO:0008270, GO:0015074	84	537	2	3	0.00062554	0.522901	-0.254301	UROBE1963355_EIv1.0_0014350	0.071514	0.18348	32
allind	UROBE1963355_EIv1.0_0014360	0	1	UROBE1963355_EIv1.0_0014360.1	Low	protein_coding_gene	Unknown protein	IPR013083 (Zinc finger, RING/FYVE/PHD-type)	None	84	414	0	1	0	0.519324	NA	UROBE1963355_EIv1.0_0014360	0.093437	0.17064	19
allind	UROBE1963355_EIv1.0_0014370	0	4	UROBE1963355_EIv1.0_0014370.1	High	protein_coding_gene	Nudix hydrolase domain-containing protein	IPR015797 (NUDIX hydrolase domain-like)	GO:0016787	84	840	0	1	0	0.553571	NA	UROBE1963355_EIv1.0_0014370	0.11285	0.15654	28
allind	UROBE1963355_EIv1.0_0014380	0	2	UROBE1963355_EIv1.0_0014380.1	High	transposable_element_gene	Integrase catalytic domain-containing protein	None	GO:0000943, GO:0003676, GO:0015074	84	762	0	1	0	0.465879	NA	UROBE1963355_EIv1.0_0014380	0.15751	0.3606	37
allind	UROBE1963355_EIv1.0_0014390	0	2	UROBE1963355_EIv1.0_0014390.1	High	protein_coding_gene	Dolichyl-diphosphooligosaccharide--protein glycosyltransferase subunit 2	IPR008814 (Dolichyl-diphosphooligosaccharide--protein glycosyltransferase subunit Swp1)	GO:0006487, GO:0008250, GO:0016020, GO:0016021	84	1008	0	1	0	0.492063	NA	UROBE1963355_EIv1.0_0014390	0.14028	0.4232	24
allind	UROBE1963355_EIv1.0_0014400	0	1	UROBE1963355_EIv1.0_0014400.1	High	transposable_element_gene	Integrase catalytic domain-containing protein	IPR012337 (Ribonuclease H-like domain)	GO:0000943, GO:0003676, GO:0015074	84	316	0	1	0	0.439873	NA	UROBE1963355_EIv1.0_0014400	0.42667	0.87821	19
allind	UROBE1963355_EIv1.0_0014410	0	1	UROBE1963355_EIv1.0_0014410.1	High	transposable_element_gene	Integrase catalytic domain-containing protein	IPR025314 (Domain of unknown function DUF4219)	GO:0000943, GO:0003676, GO:0015074	84	402	0	1	0	0.430348	NA	UROBE1963355_EIv1.0_0014410	0.39616	0.85518	13
allind	UROBE1963355_EIv1.0_0014420	0	2	UROBE1963355_EIv1.0_0014420.1	High	protein_coding_gene	PCI domain-containing protein	IPR000717 (Proteasome component (PCI) domain), IPR013586 (26S proteasome regulatory subunit, C-terminal)	GO:0000502, GO:0006511, GO:0008541, GO:0030234, GO:0042176, GO:0050790	84	1632	0	1	0	0.481618	NA	UROBE1963355_EIv1.0_0014420	0.41676	0.81204	13
allind	UROBE1963355_EIv1.0_0014430	0	2	UROBE1963355_EIv1.0_0014430.1	Low	protein_coding_gene	Unknown protein	None	None	84	297	2	3	0.000794906	0.551828	-0.651463	UROBE1963355_EIv1.0_0014430	0.35223	0.74239	14
allind	UROBE1963355_EIv1.0_0014440	0	1	UROBE1963355_EIv1.0_0014440.1	High	protein_coding_gene	Alpha/beta-hydrolase	IPR029058 (Alpha/Beta hydrolase fold)	GO:0016787	84	1272	2	3	7.35196e-05	0.475666	-1.21867	UROBE1963355_EIv1.0_0014440	0.21492	0.50552	33
allind	UROBE1963355_EIv1.0_0014450	0	2	UROBE1963355_EIv1.0_0014450.1	High	protein_coding_gene	Protein kinase domain-containing protein	IPR011009 (Protein kinase-like domain), IPR016024 (Armadillo-type fold)	None	84	4302	2	3	1.1069e-05	0.496051	-1.40128	UROBE1963355_EIv1.0_0014450	0.27868	0.44944	18
allind	UROBE1963355_EIv1.0_0014460	0	1	UROBE1963355_EIv1.0_0014460.1	High	protein_coding_gene	Tip elongation aberrant protein 1	IPR015915 (Kelch-type beta propeller)	None	84	4854	5	6	0.000120796	0.516496	-0.906927	UROBE1963355_EIv1.0_0014460	0.23542	0.42676	15
allind	UROBE1963355_EIv1.0_0014470	0	1	UROBE1963355_EIv1.0_0014470.1	Low	predicted_gene	Unknown protein	None	None	84	567	1	2	4.19921e-05	0.51854	-1.04726	UROBE1963355_EIv1.0_0014470	0.13075	0.21049	21
allind	UROBE1963355_EIv1.0_0014480	0	3	UROBE1963355_EIv1.0_0014480.1	High	protein_coding_gene	Autophagy-protein 2	IPR015412 (Autophagy-related, C-terminal), IPR026849 (Autophagy-related protein 2)	None	84	5796	4	5	7.08246e-05	0.496518	-0.995427	UROBE1963355_EIv1.0_0014480	0.10763	0.22204	16
allind	UROBE1963355_EIv1.0_0014490	0	1	UROBE1963355_EIv1.0_0014490.1	High	protein_coding_gene	WD_REPEATS_REGION domain-containing protein	IPR015943 (WD40/YVTN repeat-like-containing domain), IPR022100 (Minichromosome loss protein Mcl1, middle region), IPR024977 (Anaphase-promoting complex subunit 4, WD40 domain)	None	84	3267	3	4	0.000225398	0.492329	0.422225	UROBE1963355_EIv1.0_0014490	0.080865	0.16385	18
allind	UROBE1963355_EIv1.0_0014500	0	1	UROBE1963355_EIv1.0_0014500.1	High	protein_coding_gene	LIM-domain-containing protein	IPR001781 (Zinc finger, LIM-type)	GO:0046872	84	1527	0	1	0	0.564506	NA	UROBE1963355_EIv1.0_0014500	0.093677	0.236	12
allind	UROBE1963355_EIv1.0_0014510	0	1	UROBE1963355_EIv1.0_0014510.1	Low	protein_coding_gene	Unknown protein	None	None	84	342	1	2	0.000203823	0.476504	-0.774319	UROBE1963355_EIv1.0_0014510	0.093677	0.236	12
allind	UROBE1963355_EIv1.0_0014520	0	1	UROBE1963355_EIv1.0_0014520.1	High	transposable_element_gene	Integrase catalytic domain-containing protein	None	GO:0000943, GO:0003676, GO:0015074	84	645	23	14	0.00521999	0.434773	-0.807291	UROBE1963355_EIv1.0_0014520	0.012601	0.012737	101
allind	UROBE1963355_EIv1.0_0014530	0	1	UROBE1963355_EIv1.0_0014530.1	High	transposable_element_gene	Integrase catalytic domain-containing protein	None	GO:0000943, GO:0003676, GO:0015074	84	696	0	1	0	0.41523	NA	UROBE1963355_EIv1.0_0014530	0.12015	0.38369	13
allind	UROBE1963355_EIv1.0_0014540	0	1	UROBE1963355_EIv1.0_0014540.1	Low	transposable_element_gene	Unknown protein	None	None	84	192	5	7	0.00859241	0.397011	1.42687	UROBE1963355_EIv1.0_0014540	0.019816	0.033205	59
allind	UROBE1963355_EIv1.0_0014550	0	3	UROBE1963355_EIv1.0_0014550.1	High	protein_coding_gene	Unplaced genomic scaffold supercont1.1, whole genome shotgun sequence	None	None	84	1077	0	1	0	0.512535	NA	UROBE1963355_EIv1.0_0014550	0.019246	0.03319	58
allind	UROBE1963355_EIv1.0_0014560	0	1	UROBE1963355_EIv1.0_0014560.1	High	protein_coding_gene	Ribonucleoside-diphosphate reductase small chain	IPR000358 (Ribonucleotide reductase small subunit family), IPR009078 (Ferritin-like superfamily)	GO:0009263, GO:0016491, GO:0055114	84	1146	29	27	0.00379028	0.505121	-0.77618	UROBE1963355_EIv1.0_0014560	0.0082559	0.014412	58
allind	UROBE1963355_EIv1.0_0014570	0	1	UROBE1963355_EIv1.0_0014570.1	High	protein_coding_gene	Structure-specific endonuclease subunit SLX1	IPR000305 (GIY-YIG nuclease superfamily)	GO:0004518, GO:0004519, GO:0004520, GO:0005634, GO:0006281, GO:0006310, GO:0006974, GO:0016787, GO:0017108, GO:0033557, GO:0090305	84	1479	1	2	7.66128e-05	0.490872	-0.515026	UROBE1963355_EIv1.0_0014570	0.1797	0.35853	21
allind	UROBE1963355_EIv1.0_0014580	0	1	UROBE1963355_EIv1.0_0014580.1	Low	predicted_gene	Unknown protein	None	None	84	171	0	1	0	0.438597	NA	UROBE1963355_EIv1.0_0014580	0.22482	0.3846	22
allind	UROBE1963355_EIv1.0_0014590	0	1	UROBE1963355_EIv1.0_0014590.1	High	protein_coding_gene	DUF218 domain-containing protein	None	GO:0016020, GO:0016021	84	1098	4	6	0.000917801	0.473567	0.532221	UROBE1963355_EIv1.0_0014590	0.12188	0.22209	26
allind	UROBE1963355_EIv1.0_0014600	0	3	UROBE1963355_EIv1.0_0014600.1	High	protein_coding_gene	Helicase ATP-binding domain-containing protein	IPR006555 (ATP-dependent helicase, C-terminal), IPR013020 (DNA helicase (DNA repair), Rad3 type), IPR014013 (Helicase superfamily 1/2, ATP-binding domain, DinG/Rad3-type), IPR027417 (P-loop containing nucleoside triphosphate hydrolase)	GO:0000166, GO:0003676, GO:0003677, GO:0004003, GO:0004386, GO:0005524, GO:0005634, GO:0006139, GO:0008026, GO:0016787, GO:0016818, GO:0032508	84	2562	1	2	0.000115887	0.439821	0.576738	UROBE1963355_EIv1.0_0014600	0.098129	0.18074	27
allind	UROBE1963355_EIv1.0_0014610	0	1	UROBE1963355_EIv1.0_0014610.1	Low	transposable_element_gene	Unknown protein	None	None	84	231	0	1	0	0.450216	NA	UROBE1963355_EIv1.0_0014610	0.067276	0.12048	18
allind	UROBE1963355_EIv1.0_0014620	0	4	UROBE1963355_EIv1.0_0014620.1	High	transposable_element_gene	Integrase catalytic domain-containing protein	IPR012337 (Ribonuclease H-like domain)	None	84	1917	2	2	9.57702e-05	0.518022	-0.860315	UROBE1963355_EIv1.0_0014620	0.077213	0.13036	13
allind	UROBE1963355_EIv1.0_0014630	0	1	UROBE1963355_EIv1.0_0014630.1	High	transposable_element_gene	Reverse transcriptase Ty1/copia-type domain-containing protein	IPR013103 (Reverse transcriptase, RNA-dependent DNA polymerase)	GO:0000943	84	510	0	1	0	0.52549	NA	UROBE1963355_EIv1.0_0014630	0.029557	0.049642	14
allind	UROBE1963355_EIv1.0_0014640	0	3	UROBE1963355_EIv1.0_0014640.1	High	transposable_element_gene	Integrase catalytic domain-containing protein	None	GO:0000943, GO:0003676, GO:0015074	84	342	1	2	0.000268409	0.517683	-0.642967	UROBE1963355_EIv1.0_0014640	0.036719	0.052007	19
allind	UROBE1963355_EIv1.0_0014650	0	1	UROBE1963355_EIv1.0_0014650.1	High	transposable_element_gene	Reverse transcriptase domain-containing protein	None	None	84	375	0	1	0	0.461333	NA	UROBE1963355_EIv1.0_0014650	0.030952	0.059406	24
allind	UROBE1963355_EIv1.0_0014660	0	4	UROBE1963355_EIv1.0_0014660.1	High	protein_coding_gene	Cog4 domain-containing protein	IPR013167 (Conserved oligomeric Golgi complex, subunit 4)	None	84	2526	0	1	0	0.450119	NA	UROBE1963355_EIv1.0_0014660	0.011334	0.020272	60
allind	UROBE1963355_EIv1.0_0014670	0	1	UROBE1963355_EIv1.0_0014670.1	High	transposable_element_gene	RNase H domain-containing protein	IPR012337 (Ribonuclease H-like domain)	None	84	324	0	1	0	0.472222	NA	UROBE1963355_EIv1.0_0014670	0.011115	0.018706	55
allind	UROBE1963355_EIv1.0_0014680	0	1	UROBE1963355_EIv1.0_0014680.1	High	protein_coding_gene	Unknown protein	None	None	84	306	0	1	0	0.441177	NA	UROBE1963355_EIv1.0_0014680	0.067447	0.083867	22
allind	UROBE1963355_EIv1.0_0014690	0	1	UROBE1963355_EIv1.0_0014690.1	High	protein_coding_gene	G-protein gamma subunit	IPR015898 (G-protein gamma-like domain)	GO:0007186	84	249	0	1	0	0.514056	NA	UROBE1963355_EIv1.0_0014690	0.033216	0.014785	47
allind	UROBE1963355_EIv1.0_0014700	0	1	UROBE1963355_EIv1.0_0014700.1	High	protein_coding_gene	Unknown protein	None	None	84	885	0	1	0	0.545763	NA	UROBE1963355_EIv1.0_0014700	0.081315	0.074231	7
allind	UROBE1963355_EIv1.0_0014710	0	1	UROBE1963355_EIv1.0_0014710.1	High	transposable_element_gene	Integrase catalytic domain-containing protein	None	None	84	336	0	1	0	0.529762	NA	UROBE1963355_EIv1.0_0014710	0.17841	0.31071	43
allind	UROBE1963355_EIv1.0_0014720	0	1	UROBE1963355_EIv1.0_0014720.1	High	protein_coding_gene	GH16 domain-containing protein	IPR013320 (Concanavalin A-like lectin/glucanase domain)	GO:0004553, GO:0005975	84	1290	0	1	0	0.491473	NA	UROBE1963355_EIv1.0_0014720	0.22357	0.36874	19
allind	UROBE1963355_EIv1.0_0014730	0	1	UROBE1963355_EIv1.0_0014730.1	High	protein_coding_gene	Unknown protein	None	None	84	414	0	1	0	0.483092	NA	UROBE1963355_EIv1.0_0014730	0.2269	0.34171	13
allind	UROBE1963355_EIv1.0_0014740	0	1	UROBE1963355_EIv1.0_0014740.1	High	protein_coding_gene	60S ribosomal export protein NMD3	IPR007064 (NMD3)	GO:0005634, GO:0005737, GO:0015031, GO:0043023	84	1662	3	5	0.00045532	0.467129	0.485169	UROBE1963355_EIv1.0_0014740	0.13965	0.14356	25
allind	UROBE1963355_EIv1.0_0014750	0	1	UROBE1963355_EIv1.0_0014750.1	High	transposable_element_gene	Integrase catalytic domain-containing protein	None	GO:0000943, GO:0003676, GO:0008270, GO:0015074	84	834	0	1	0	0.504796	NA	UROBE1963355_EIv1.0_0014750	0.15231	0.14551	22
allind	UROBE1963355_EIv1.0_0014760	0	2	UROBE1963355_EIv1.0_0014760.1	Low	predicted_gene	Unknown protein	None	None	84	210	0	1	0	0.528571	NA	UROBE1963355_EIv1.0_0014760	0.076254	0.14632	25
allind	UROBE1963355_EIv1.0_0014770	0	1	UROBE1963355_EIv1.0_0014770.1	Low	predicted_gene	Unknown protein	None	None	84	162	0	1	0	0.395062	NA	UROBE1963355_EIv1.0_0014770	0.18899	0.35071	9
allind	UROBE1963355_EIv1.0_0014780	0	2	UROBE1963355_EIv1.0_0014780.1	High	protein_coding_gene	Serine/threonine-protein kinase TOR	IPR003152 (FATC domain), IPR009076 (FKBP12-rapamycin binding domain), IPR011009 (Protein kinase-like domain), IPR011990 (Tetratricopeptide-like helical domain), IPR014009 (PIK-related kinase), IPR016024 (Armadillo-type fold), IPR024585 (Domain of unknown function DUF3385, target of rapamycin protein), IPR026683 (Serine/threonine-protein kinase TOR)	GO:0000166, GO:0004674, GO:0005524, GO:0006468, GO:0016301, GO:0016310, GO:0016740, GO:0044877	84	7218	1	2	6.51778e-06	0.466476	-0.909084	UROBE1963355_EIv1.0_0014780	0.065742	0.14599	17
allind	UROBE1963355_EIv1.0_0014790	0	2	UROBE1963355_EIv1.0_0014790.1	High	protein_coding_gene	Chitin synthase	IPR004835 (Chitin synthase), IPR013616 (Chitin synthase N-terminal)	GO:0004100, GO:0006031, GO:0016020, GO:0016021, GO:0016758	84	2658	0	1	0	0.489842	NA	UROBE1963355_EIv1.0_0014790	0.011095	0.0045763	99
allind	UROBE1963355_EIv1.0_0014800	0	1	UROBE1963355_EIv1.0_0014800.1	High	transposable_element_gene	Integrase catalytic domain-containing protein	None	GO:0000943, GO:0003676, GO:0015074, GO:0016020, GO:0016021	84	1049	0	1	0	0.450906	NA	UROBE1963355_EIv1.0_0014800	0.059052	0.094846	29
allind	UROBE1963355_EIv1.0_0014810	0	1	UROBE1963355_EIv1.0_0014810.1	High	transposable_element_gene	DUF4219 domain-containing protein	None	GO:0016020, GO:0016021	84	366	0	1	0	0.478142	NA	UROBE1963355_EIv1.0_0014810	0.1237	0.20836	12
allind	UROBE1963355_EIv1.0_0014820	0	1	UROBE1963355_EIv1.0_0014820.1	High	transposable_element_gene	Integrase catalytic domain-containing protein	None	GO:0000943, GO:0003676, GO:0015074	84	702	1	2	0.000161411	0.450227	-0.515026	UROBE1963355_EIv1.0_0014820	0.095117	0.16932	10
allind	UROBE1963355_EIv1.0_0014830	0	4	UROBE1963355_EIv1.0_0014830.1	High	transposable_element_gene	Integrase catalytic domain-containing protein	IPR012337 (Ribonuclease H-like domain)	GO:0003676, GO:0015074	84	720	0	1	0	0.454167	NA	UROBE1963355_EIv1.0_0014830	0.13869	0.26217	13
allind	UROBE1963355_EIv1.0_0014840	0	1	UROBE1963355_EIv1.0_0014840.1	Low	transposable_element_gene	Unknown protein	None	None	84	234	0	1	0	0.525641	NA	UROBE1963355_EIv1.0_0014840	0.13869	0.26217	13
allind	UROBE1963355_EIv1.0_0014850	0	2	UROBE1963355_EIv1.0_0014850.1	High	protein_coding_gene	RRM domain-containing protein	IPR012677 (Nucleotide-binding alpha-beta plait domain), IPR025742 (Cleavage stimulation factor subunit 2, hinge domain), IPR026896 (Transcription termination and cleavage factor, C-terminal domain)	GO:0003676, GO:0003723, GO:0003729, GO:0005847, GO:0031124, GO:0098789	84	1080	0	1	0	0.537963	NA	UROBE1963355_EIv1.0_0014850	0.054356	0.13374	42
allind	UROBE1963355_EIv1.0_0014860	0	4	UROBE1963355_EIv1.0_0014860.1	High	protein_coding_gene	40S ribosomal protein S12	IPR000530 (Ribosomal protein S12e), IPR029064 (50S ribosomal protein L30e-like)	GO:0003735, GO:0005840, GO:0006412	84	450	1	2	0.000726079	0.511561	0.75415	UROBE1963355_EIv1.0_0014860	0.15053	0.36762	30
allind	UROBE1963355_EIv1.0_0014870	0	1	UROBE1963355_EIv1.0_0014870.1	High	transposable_element_gene	CCHC-type domain-containing protein	IPR001878 (Zinc finger, CCHC-type)	GO:0003676, GO:0008270	84	510	0	1	0	0.482353	NA	UROBE1963355_EIv1.0_0014870	0.1415	0.36748	29
allind	UROBE1963355_EIv1.0_0014880	0	3	UROBE1963355_EIv1.0_0014880.1	High	protein_coding_gene	DBR1 domain-containing protein	IPR007708 (Lariat debranching enzyme, C-terminal), IPR029052 (Metallo-dependent phosphatase-like)	GO:0006397, GO:0016787, GO:0016788	84	1818	1	2	5.04927e-05	0.456546	-0.642967	UROBE1963355_EIv1.0_0014880	0.10614	0.1482	15
allind	UROBE1963355_EIv1.0_0014890	0	3	UROBE1963355_EIv1.0_0014890.1	High	protein_coding_gene	Pyruvate carboxylase	IPR005930 (Pyruvate carboxylase), IPR009057 (Homeobox domain-like), IPR011761 (ATP-grasp fold), IPR016185 (Pre-ATP-grasp domain)	GO:0000166, GO:0003824, GO:0004736, GO:0005524, GO:0006090, GO:0006094, GO:0009374, GO:0016874, GO:0046872	84	3627	22	12	0.000289551	0.499934	-2.28226	UROBE1963355_EIv1.0_0014890	0.013091	0.013355	47
allind	UROBE1963355_EIv1.0_0014900	0	1	UROBE1963355_EIv1.0_0014900.1	High	transposable_element_gene	Reverse transcriptase Ty1/copia-type domain-containing protein	IPR013103 (Reverse transcriptase, RNA-dependent DNA polymerase)	GO:0000943	84	273	0	1	0	0.432234	NA	UROBE1963355_EIv1.0_0014900	0.064871	0.075587	11
allind	UROBE1963355_EIv1.0_0014910	0	1	UROBE1963355_EIv1.0_0014910.1	Low	transposable_element_gene	Unknown protein	None	None	84	279	0	1	0	0.46595	NA	UROBE1963355_EIv1.0_0014910	0.071657	0.095171	7
allind	UROBE1963355_EIv1.0_0014920	0	2	UROBE1963355_EIv1.0_0014920.1	High	protein_coding_gene	V-type proton ATPase proteolipid subunit	IPR000245 (V-ATPase proteolipid subunit), IPR002379 (V-ATPase proteolipid subunit C-like domain)	GO:0005773, GO:0005774, GO:0006811, GO:0015078, GO:0015991, GO:0016020, GO:0016021, GO:0033177, GO:0033179	84	498	0	1	0	0.491968	NA	UROBE1963355_EIv1.0_0014920	0.31306	0.68719	19
allind	UROBE1963355_EIv1.0_0014930	0	4	UROBE1963355_EIv1.0_0014930.1	High	protein_coding_gene	Gem (Nuclear organelle) associated protein 2	None	None	84	969	3	4	0.000642701	0.530677	0.071157	UROBE1963355_EIv1.0_0014930	0.086432	0.1577	43
allind	UROBE1963355_EIv1.0_0014940	0	1	UROBE1963355_EIv1.0_0014940.1	Low	transposable_element_gene	Unknown protein	None	None	84	189	0	1	0	0.455026	NA	UROBE1963355_EIv1.0_0014940	0.039539	0.1076	44
allind	UROBE1963355_EIv1.0_0014950	0	1	UROBE1963355_EIv1.0_0014950.1	High	transposable_element_gene	Unknown protein	None	None	84	729	0	1	0	0.455418	NA	UROBE1963355_EIv1.0_0014950	0.20318	0.43012	18
allind	UROBE1963355_EIv1.0_0014960	0	1	UROBE1963355_EIv1.0_0014960.1	Low	transposable_element_gene	RNase H domain-containing protein	IPR012337 (Ribonuclease H-like domain)	GO:0003676, GO:0004523, GO:0090502	84	285	0	1	0	0.480702	NA	UROBE1963355_EIv1.0_0014960	0.15424	0.365	17
allind	UROBE1963355_EIv1.0_0014970	0	1	UROBE1963355_EIv1.0_0014970.1	Low	transposable_element_gene	Unknown protein	None	None	84	369	17	25	0.0160122	0.46677	2.13547	UROBE1963355_EIv1.0_0014970	0.072024	0.16515	45
allind	UROBE1963355_EIv1.0_0014980	0	1	UROBE1963355_EIv1.0_0014980.1	Low	predicted_gene	Unknown protein	None	None	84	282	1	2	8.44309e-05	0.439674	-1.04726	UROBE1963355_EIv1.0_0014980	0.0015497	0.0076976	102
[truncated: 76,562 more rows]
