# Supplementary material for: Developing a crop- wild-reservoir pathogen system to understand pathogen evolution and emergence
Source: eLife. 2025 Apr 11;14:e91245. doi: 10.7554/eLife.91245 (PMC11991705; doi:10.7554/eLife.91245)
Supplement: Supplementary file 2. — Sample – Isolate sampling data listed north to south including information on whether isolation was from a wild or crop beet (W-Ag_host) and how isolates clustered after DAPC analysis of genotypes (W-Ag_path-DAPC). Region abbreviation and colour (W-Ag_host) is used in samples names in Figure 1 in the main text. Proximity – Individual host proximity measures are listed for each sample in addition to average and greatest distances per site. Wild sites are sampling locations in the truest sense, but crop samples were grouped by region after being sent from growers via the BBRO. GPS coordinates of sites were not able to be shared due to data protection. [file elife-91245-supp2.xlsx]

## Sheet: Sample
Individual ID	W-Ag host	W-Ag path-DAPC	Date	Region	Local_abbrv
ub-w_170_hfs_15dec	Wild	Agri	2015-12-09	Hessle Foreshore	hfs
ub-w_174_hfs_15dec	Wild	Agri	2015-12-09	Hessle Foreshore	hfs
ub-a_053_hfs_15sep	Agri	Agri	2015-09-04	Hessle Foreshore	hfs
ub-a_527_hsw_15sep	Agri	Agri	2015-09-18	Hibaldstow	hsw
ub-a_207_hsw_15sep	Agri	Agri	2015-09-18	Hibaldstow	hsw
ub-a_518_hsw_15sep	Agri	Agri	2015-09-25	Hibaldstow	hsw
ub-a_096_hfs_15sep	Agri	Agri	2015-09-03	Hessle Foreshore	hfs
ub-a_400_lcn_15sep	Agri	Agri	2015-09-14	Lincoln	lcn
ub-a_382_lcn_15sep	Agri	Agri	2015-09-14	Lincoln	lcn
ub-a_383_lcn_15sep	Agri	Agri	2015-09-14	Lincoln	lcn
ub-a_411_bnm_15sep	Agri	Agri	2015-09-14	Bingham	bnm
ub-a_290_kln_15sep	Agri	Agri	2015-09-18	King's Lynn	kln
ub-w_451_kln_15oct	Wild	Agri	2015-10-27	King's Lynn	kln
ub-a_372_kln_15sep	Agri	Agri	2015-09-14	King's Lynn	kln
ub-w_142_kln_15oct	Wild	Agri	2015-10-27	King's Lynn	kln
ub-w_418_kln_15oct	Wild	Agri	2015-10-27	King's Lynn	kln
ub-a_263_wxm_15sep	Agri	Agri	2015-09-14	Waxham	wxm
ub-a_338_wxm_15sep	Agri	Agri	2015-09-15	Waxham	wxm
ub-a_331_wxm_15sep	Agri	Agri	2015-09-15	Waxham	wxm
ub-a_509_kln_15oct	Agri	Agri	2015-10-23	King's Lynn	kln
ub-a_313_gbm_15sep	Agri	Agri	2015-09-15	Garboldisham	gbm
ub-a_292_gbm_15sep	Agri	Agri	2015-09-15	Garboldisham	gbm
ub-a_245_gbm_15sep	Agri	Agri	2015-09-15	Garboldisham	gbm
ub-w_419_swd_15oct	Wild	Wild	2015-10-14	Southwold	swd
ub-w_228_swd_16nov	Wild	Wild	2016-11-08	Southwold	swd
ub-w_229_swd_16nov	Wild	Wild	2016-11-08	Southwold	swd
ub-w_109_swd_15oct	Wild	Wild	2015-10-14	Southwold	swd
ub-w_052_swd_16nov	Wild	Wild	2016-11-08	Southwold	swd
ub-w_097_swd_15oct	Wild	Wild	2015-10-14	Southwold	swd
ub-a_037_ofd_15sep	Agri	Agri	2015-09-07	Orford	ofd
ub-a_519_ofd_15oct	Agri	Agri	2015-10-01	Orford	ofd
ub-a_491_ofd_15oct	Agri	Agri	2015-10-01	Orford	ofd
ub-w_145_ofd_15oct	Wild	Wild	2015-10-14	Orford	ofd
ub-w_075_ofd_15nov	Wild	Wild	2015-11-08	Orford	ofd
ub-w_090_ofd_16nov	Wild	Wild	2016-11-08	Orford	ofd
ub-w_077_ofd_15nov	Wild	Wild	2015-11-08	Orford	ofd
ub-w_204_ofd_16nov	Wild	Wild	2016-11-08	Orford	ofd
ub-a_236_bos_15sep	Agri	Agri	2015-09-18	Bradwell-on-Sea	bos
ub-a_278_bos_15sep	Agri	Agri	2015-09-16	Bradwell-on-Sea	bos
ub-a_360_bos_15sep	Agri	Agri	2015-09-14	Bradwell-on-Sea	bos
ub-w_470_bos_15nov	Wild	Wild	2015-11-18	Bradwell-on-Sea	bos
ub-w_458_bos_15nov	Wild	Wild	2015-11-18	Bradwell-on-Sea	bos

## Sheet: Proximity
Region	Sample No.	Wild or Agricultural Host plant	Wild or Agricultural Rust (DAPC)	Closest neighbour (km)	Closest Agri plant (km)	Closest Wild plant (km)	Region	Average distance between plants Agri (km)	Most distant plants Agri	Region	Average distance between plants Wild (km)	Most distant plants Wild
hfs	170	W	A	0.5	9.2(53)	0.5(174)	Hibaldstow (hsw: DN18,DN20)	15.7	31.6	Hessle Foreshore (hfs: HU13)	0.1	0.1
hfs	174	W	A	0.5	9.3(53)	0.5(170)	Lincoln (lcn: LN7, NG23, LN5, LN6)	58.8	120.6	King's Lynn (kln: PE30)	1.7	3.2
hfs	053	A	A	9.2	31.3(518)	9.2(170)	Bingham, Kings Lynn (bnm, kln: NG13, PE6, PE31, NR20)	74.4	107	Garboldisham (gbm: NR16)	0.1	0.1
hsw	527	A	A	0.3	0.3(207)	39.4(170)	Waxham (wxm: NR29)	7.6	10.8	Southwold (swd: IP18)	0.3	0.3
hsw	207	A	A	0.2	0.2(518)	39.9(174)	Orford (ofd: IP12)	6.75	8.9	Orford (ofd: IP12)	1.4	2.2
hsw	518	A	A	0.1	0.1(527)	39.26(174)	Bradwell-on-Sea (bos: C09,CB10)	14.5	16	Bradwell-on-Sea (bos: CM0)	0.3	0.3
hfs	096	A	A	23.6	23.6(518)	43.8(170)
lcn	400	A	A	17.7	17.7(382)	104.2(170)
lcn	382	A	A	12.8	12.8(382)	102.7(170)
lcn	383	A	A	12.8	12.8(383)	99.3(170)
bnm	411	A	A	45	45(400)	148.9(170)
kln	290	A	A	17	17.0(372)	40.0(451)
kln	451	W	A	2.3	40.6(290)	2.3(418)
kln	372	A	A	17.4	17.4(290)	51.5(418)
kln	142	W	A	0.5	40.3(290)	0.5(418)
kln	418	W	A	0.7	40.3(290)	0.7(142)
wxm	263	A	A	3.9	3.9(338)	68.5(419)
wxm	338	A	A	3.7	3.7(263)	68.5(229)
wxm	331	A	A	8	8(263)	62.2(419)
kln	509	A	A	59.7	99.2(290)	59.7(418)
gbm	313	A	A	0.3	0.3(245)	82.7(418)
gbm	292	A	A	0.3	0.3(313)	82.6(109)
gbm	245	A	A	0.5	0.5(292)	82.3(109)
swd	419	W	W	0.2	49.7(37)	0.2(109)
swd	228	W	W	0.3	44.7(75)	0.3(229)
swd	229	W	W	0.1	49.7(519)	0.1(228)
swd	109	W	W	0.3	49.7(37)	0.3(228)
swd	052	W	W	0.1	49.7(37&519)	0.1(97)
swd	097	W	W	0.1	83.1(313)	0.1(52)
ofd	037	A	A	0.1	0.1(519)	16.3(75)
ofd	519	A	A	0.9	0.9(37)	16.4(75)
ofd	491	A	A	8.9	8.9(37)	24.9(145)
ofd	145	W	W	0.1	16.4(37)	0.1(75)
ofd	075	W	W	0.7	16.3(519)	0.7(90)
ofd	090	W	W	0.5	16.5(37)	0.5(77)
ofd	077	W	W	0.1	16.9 (519)	0.1 (204)
ofd	204	W	W	0.7	16.8(519)	0.7(90)
bos	236	A	A	11.2	11.2 (360)	68.3 (470)
bos	278	A	A	16	16.0(236)	71.1(458)
bos	360	A	A	11.7	11.7(236)	57.7(470)
bos	458	W	W	0.1	58.1(360)	0.1(470)
bos	470	W	W	0.4	58.4(360)	0.4(458)
