# Supplementary material for: Developing a crop- wild-reservoir pathogen system to understand pathogen evolution and emergence
Source: eLife. 2025 Apr 11;14:e91245. doi: 10.7554/eLife.91245 (PMC11991705; doi:10.7554/eLife.91245)
Supplement: Supplementary file 3. — Skim sequencing of 404 rust peels was used to assess library performance. Rust libraries in green were considered for re-sequencing. [file elife-91245-supp3.xlsx]

## Sheet: Sheet1
Sample No.	Infection	Wild or Agricultural	Read count	Rust Coverage (-q 60)
346	R	A	24	280
498	R	A	13	519
490	R	A	22	1083
219	R	A	16	1471
463	R	W	23	1583
161	R	W	20	1669
165	R	A	19	1759
304	R	A	22	1772
344	R	A	21	1804
82	R	A	14	2037
146	R	W	20	2069
28	R	A	26	2091
26	R	A	24	2389
65	R	A	17	2636
301	R	A	23	2772
318	R	A	30	2834
308	R	A	25	2955
164	R	A	39	3117
438	R	W	31	3261
251	R	A	46	3556
311	R	A	34	3606
160	R	A	24	3727
427	R	W	53	3890
125	R	W	35	4307
414	R	A	40	5063
324	R	A	42	5111
230	R	W	73	6377
111	R	W	217	20152
417	R	W	635	110365
35	R	A	298003	171188
47	R	A	352501	174740
168	R	A	304917	193679
2	R	A	331870	231920
339	R	A	330488	579185
171	R	A	329524	947052
405	R	A	396741	1650070
151	R	A	291638	1780970
221	R	A	306739	1867895
69	R	A	550832	2052329
460	R	W	352768	2234492
407	R	A	481930	2264075
247	R	A	239530	2492400
238	R	A	483877	2619669
307	R	A	392236	2679194
169	R	A	347748	2722361
92	R	A	300498	2889404
71	R	A	352198	2989485
486	R	A	386792	2991020
327	R	A	388552	3013017
288	R	A	377814	3036866
406	R	A	282556	3145818
432	R	W	437437	3153702
70	R	A	333447	3212757
462	R	A	356624	3240215
237	R	A	350883	3395666
335	R	A	393912	3484040
394	R	A	350680	3786968
443	R	A	308291	3817884
196	R	A	317001	3929319
25	R	A	366272	3985048
442	R	W	376985	4215992
359	R	A	349963	4385870
483	R	A	317574	4422647
172	R	W	292429	4663070
86	R	A	335442	4742943
256	R	A	302171	4838898
79	R	W	371534	4877877
391	R	A	397226	4966289
302	R	A	372006	5115211
524	R	A	320781	5141412
54	R	W	353190	5150927
365	R	A	382033	5209784
337	R	A	311815	5431797
64	R	A	402852	5473423
211	R	A	385996	5538616
36	R	A	336888	5567815
267	R	A	555942	5600757
375	R	A	314387	5608522
329	R	A	318896	5841551
361	R	A	392262	5854859
476	R	A	477957	5879338
356	R	A	376322	5882806
298	R	A	378016	5903745
167	R	W	421613	6003299
384	R	A	433202	6163064
381	R	A	371504	6372941
529	R	A	348857	6592723
93	R	A	316306	6744964
74	R	W	322393	6762040
277	R	A	349152	6797662
280	R	A	328430	6844232
62	R	A	346032	6872072
495	R	A	391269	6937428
73	R	W	411402	6952355
231	R	A	390512	6956750
336	R	A	381730	6998861
216	R	A	390425	7011623
516	R	A	363739	7097990
408	R	A	396077	7201035
84	R	A	330358	7205684
357	R	A	386703	7228984
364	R	A	311896	7253066
104	R	W	457655	7294938
208	R	A	299375	7338701
310	R	A	381123	7348204
41	R	A	312531	7438284
117	R	W	341409	7447346
63	R	A	419354	7454179
398	R	A	349257	7550122
105	R	W	305332	7557861
257	R	A	301105	7682953
8	R	A	343159	7826149
409	R	A	320656	7884743
243	R	A	276741	7929627
380	R	A	504740	8012598
528	R	A	350021	8017507
131	R	W	375588	8071747
128	R	W	303713	8102939
132	R	W	251914	8179683
49	R	A	411326	8276344
521	R	A	360373	8482779
478	R	A	381020	8566029
269	R	A	349508	8658293
530	R	A	619352	8753579
30	R	A	355203	8788332
515	R	A	542394	8858588
450	R	W	344875	8999638
543	R	A	277649	9008364
520	R	A	329236	9045831
21	R	A	357310	9058208
403	R	A	324464	9082615
68	R	A	356734	9083066
19	R	A	363865	9107121
99	R	W	311555	9207319
67	R	A	369271	9260246
223	R	A	347569	9370725
72	R	A	333445	9372920
126	R	W	365956	9573914
369	R	A	405095	9702572
246	R	A	366277	9774444
6	R	A	403925	9800056
88	R	W	324696	9834685
206	R	A	335735	9846088
236	R	A	385587	9846979
274	R	A	350535	9874612
94	R	W	394705	9878226
252	R	A	386632	9895928
7	R	A	312200	9966249
260	R	A	294822	9994308
57	R	A	333033	10036330
305	R	A	399079	10040492
294	R	A	348408	10078937
370	R	A	369488	10159968
378	R	A	336509	10193419
367	R	A	134092	10235146
348	R	A	461635	10291322
475	R	A	286378	10406581
511	R	A	370310	10428547
80	R	W	362506	10440528
322	R	A	271149	10471396
481	R	A	309203	10495228
321	R	A	268087	10606916
77	R	W	448526	10694871
226	R	W	363499	10711817
493	R	A	348353	10770528
397	R	A	337456	10884012
358	R	A	459909	10924353
282	R	A	401788	10931691
410	R	A	339036	10967116
98	R	W	413156	10976606
158	R	W	292797	11013573
224	R	A	367992	11022768
115	R	W	405922	11067554
404	R	A	338267	11072280
387	R	A	306800	11132907
43	R	A	364226	11237244
415	R	W	430405	11238762
317	R	A	381361	11269294
334	R	A	275167	11345460
320	R	A	417050	11347979
312	R	A	346475	11374012
162	R	W	400163	11382004
271	R	A	320502	11472126
261	R	A	372376	11476826
145	R	W	322448	11479238
55	R	A	339388	11481874
12	R	A	351122	11515236
258	R	A	340491	11561889
155	R	W	336585	11628810
11	R	A	394232	11633095
33	R	A	340017	11644336
45	R	A	449776	11731324
275	R	A	348175	11792892
393	R	A	356890	11793184
205	R	A	286418	11806647
194	R	A	573046	11814936
371	R	A	502843	11923527
345	R	A	294012	11961222
91	R	W	378971	11971703
200	R	A	390369	11978350
440	R	A	405852	12007160
315	R	A	364167	12011001
114	R	W	292819	12023292
494	R	A	457139	12080893
526	R	A	265752	12109016
250	R	A	347354	12161535
295	R	A	362534	12182455
402	R	A	409432	12197444
453	R	W	371680	12237511
266	R	A	311063	12240133
360	R	A	370700	12281330
142	R	W	380660	12294338
444	R	W	339098	12298505
446	R	A	294087	12302892
465	R	W	356199	12304404
434	R	A	313457	12322147
212	R	A	306947	12355043
412	R	A	367771	12372811
300	R	A	265449	12439402
464	R	W	301253	12473866
10	R	A	312392	12620923
488	R	A	341939	12706261
316	R	W	295516	12742104
150	R	W	325111	12874654
342	R	A	403291	12889492
291	R	A	295178	12901772
75	R	W	347031	12943645
293	R	A	370909	12954341
66	R	A	394715	12977676
355	R	A	456091	13072317
273	R	A	377550	13084926
385	R	A	381111	13169416
278	R	A	366960	13190927
389	R	A	459356	13198287
373	R	A	336597	13198449
272	R	A	357119	13303230
166a	R	W	317349	13325895
235	R	A	410888	13332378
523	R	A	406865	13366921
328	R	A	361978	13384204
286	R	A	319529	13424628
352	R	A	336296	13464064
363	R	A	274127	13483472
90	R	W	350923	13489809
29	R	A	291984	13498567
20	R	A	323518	13605832
31	R	A	328547	13636725
347	R	A	347943	13667801
56	R	A	365731	13730225
234	R	A	432968	13794465
14	R	A	308798	13816433
202	R	W	360189	13860419
285	R	A	398282	13889652
284	R	A	318319	13906130
270	R	A	298275	13907725
255	R	A	302992	13948522
368	R	A	367057	13992863
504	R	A	330786	14004413
473	R	A	335338	14041460
233	R	A	395817	14073557
366	R	A	361503	14101529
263	R	A	361606	14106271
265	R	A	322919	14125822
108	R	W	329467	14167601
466	R	W	451406	14252296
210	R	A	284383	14266438
500	R	A	289211	14271413
374	R	A	540503	14272368
513	R	A	339877	14321216
259	R	A	473432	14359583
392	R	A	377233	14365418
458	R	W	285436	14386328
420	R	W	334513	14389893
52	R	W	331658	14406167
22	R	A	548378	14414933
279	R	A	322724	14478730
467	R	W	420394	14550957
9	R	A	364168	14564006
289	R	A	450378	14567735
175	R	W	364022	14570175
309	R	A	345374	14581144
482	R	A	404944	14587855
38	R	A	318773	14601501
17	R	A	302201	14605640
214	R	W	333518	14608870
242	R	A	348924	14687588
27	R	A	377630	14739398
383	R	A	380830	14780665
382	R	A	415176	14785514
343	R	A	397858	14795271
281	R	A	330264	14868940
13	R	A	349714	14873716
48	R	A	415228	14907524
244	R	A	503215	14944365
37	R	A	393413	14947850
508	R	A	177928	14962632
3	R	A	347197	14976012
23	R	A	355337	15049833
290	R	A	339810	15080033
330	R	A	305120	15124315
78	R	W	347131	15127103
209	R	A	380031	15137265
325	R	A	341731	15151726
480	R	A	342285	15181333
137	R	W	319770	15195062
349	R	A	334295	15231775
18	R	A	302193	15250326
351	R	A	392028	15323923
503	R	A	362070	15325852
518	R	A	410216	15330291
496	R	A	378088	15338450
388	R	A	400338	15347391
153	R	A	370556	15349312
166b	R	W	335071	15359190
97	R	W	330826	15365938
506	R	A	339046	15367258
44	R	A	335297	15426952
157	R	W	372095	15432568
376	R	A	334797	15460907
379	R	A	327918	15475162
199	R	A	326564	15478005
399	R	A	338477	15479176
297	R	A	311991	15487865
232	R	A	414507	15580077
491	R	A	398739	15619284
4	R	A	332021	15622742
350	R	A	389286	15642189
411	R	A	352005	15708643
395	R	W	496630	15732413
50	R	A	320999	15766883
287	R	A	421269	15773687
283	R	A	340776	15773906
264	R	A	374008	15802426
331	R	A	334084	15856543
418	R	W	345978	15947456
461	R	W	432536	15961303
228	R	W	386095	15963204
354	R	A	422807	15974454
248	R	A	325107	15984266
147	R	A	346073	16010622
15	R	A	393538	16099373
296	R	A	372067	16124852
89	R	A	319950	16150963
83	R	A	352573	16212121
53	R	A	390458	16226248
470	R	W	371328	16316232
306	R	A	386550	16347480
413	R	A	309611	16358760
276	R	A	338375	16377793
510	R	A	379967	16438132
484	R	A	383985	16442756
148	R	W	373212	16445213
341	R	A	338783	16472686
314	R	A	364675	16479129
220	R	W	335343	16489548
87	R	A	353747	16501640
396	R	A	339660	16518381
254	R	A	410983	16524939
323	R	A	280956	16527447
59	R	A	393631	16531916
292	R	A	377295	16587196
262	R	A	310061	16611673
39	R	A	392157	16630750
207	R	A	408905	16638946
372	R	A	366067	16754965
217	R	A	374627	16842694
178	R	W	512072	16847446
204	R	W	366560	16857365
61	R	A	340201	16875231
332	R	A	388489	16890344
109	R	W	429640	16893224
241	R	A	336907	16894040
253	R	A	432775	16905032
225	R	A	346415	16928385
401	R	A	337090	16952473
229	R	W	415578	16985946
51	R	A	442879	17011356
46	R	A	582079	17031294
303	R	A	383279	17060208
173	R	A	403980	17098306
81	R	A	432276	17101833
174	R	W	411328	17134803
32	R	A	366821	17181318
170	R	W	347913	17258323
245	R	A	423441	17285350
333	R	A	405489	17365796
95	R	A	298028	17370616
268	R	A	408514	17445569
419	R	W	278498	17461727
519	R	A	502290	17566839
96	R	A	348455	17573222
42	R	A	383233	17765209
58	R	A	398568	17803461
34	R	A	272527	17994358
451	R	W	313822	18075694
249	R	A	370713	18105051
156	R	W	304879	18147193
400	R	A	379195	18183210
509	R	A	372896	18252924
85	R	A	262738	18270956
338	R	A	340564	18426399
213	R	A	388440	18513275
313	R	A	291362	18780758
527	R	A	342702	16965137
